# Supplementary material for: Multiplexed Assays of Human Disease-relevant Mutations Reveal UTR Dinucleotide Composition as a Major Determinant of RNA Stability
Source: bioRxiv preprint, doi:10.1101/2024.04.10.588845, version 2 (2024-10-17)
Supplement: Supplemental Table S1 [file 588845_file03.xlsx]

## Sheet: Sup_T2_metaTable
Mutant	variant_name	GeneSymbol	Chromosome	Start	Stop	UTR_Group	ReferenceAllele	AlternateAllele	t05_WT_SH	t05_mt_SH	pval_SH	sig_SH	t05_WT_HEK	t05_mt_HEK	pval_HEK	sig_HEK	GCcontent_WT	GCcontent_mt	TA_ratio_WT	TA_ratio_mt
chr1_100210692_100210693_-_G_-	NM_001918.3(DBT):c.940_1017del78	DBT	chr1	100210692	100210693	3'UTR	G	-					86.1445	66.5598	0.372332	no	0.406452	0.402597	0.103704	0.104478
chr11_2661959_2661960_-_C_A	NM_000218.2(KCNQ1):c.1394-1G>T	KCNQ1	chr11	2661959	2661960	3'UTR	C	A	119.832	49.5942	0.380457	no	70.5165	94.5881	0.140119	no	0.548387	0.541935	0.0296296	0.0296296
chr11_31664396_31664397_-_G_T	(G-T)_+125537_to_termination_codon	PAX6	chr11	31664396	31664397	3'UTR	G	T					96.0943	83.2626	0.546607	no	0.445161	0.43871	0.0518519	0.0592593
chr11_5225465_5225466_-_C_A	(C-A)_+132_to_termination_codon	HBB	chr11	5225465	5225466	3'UTR	C	A	19.2213	31.1677	0.357336	no	72.304	70.8568	0.907631	no	0.412903	0.406452	0.0888889	0.0888889
chr11_5225465_5225466_-_C_T	(C-T)_+132_to_termination_codon	HBB	chr11	5225465	5225466	3'UTR	C	T	19.2213	19.5258	0.970844	no	72.304	71.8371	0.970858	no	0.412903	0.406452	0.0888889	0.0888889
chr11_5225468_5225469_-_T_C	(T-C)_+129_to_termination_codon	HBB	chr11	5225468	5225469	3'UTR	T	C	19.2213	11.7646	0.130178	no	72.304	73.1752	0.9477	no	0.412903	0.419355	0.0888889	0.0888889
chr11_5225483_5225488_-_TAAAA_-	NM_000518.4(HBB):c.*110_*114delTAAAA	HBB	chr11	5225483	5225488	3'UTR	TAAAA	-					70.2197	92.1848	0.583351	no	0.415094	0.428571	0.0863309	0.0820896
chr11_5225484_5225485_-_A_G	NM_000518.4(HBB):c.*113A>G	HBB	chr11	5225484	5225485	3'UTR	A	G	19.2213	16.687	0.739595	no	72.304	73.3786	0.942696	no	0.412903	0.419355	0.0888889	0.0888889
chr11_5225485_5225486_-_A_G	NM_000518.4(HBB):c.*112A>G	HBB	chr11	5225485	5225486	3'UTR	A	G					72.304	76.4956	0.806004	no	0.412903	0.419355	0.0888889	0.0888889
chr11_5225486_5225487_-_A_G	NM_000518.4(HBB):c.*111A>G	HBB	chr11	5225486	5225487	3'UTR	A	G					72.304	75.0245	0.821914	no	0.412903	0.419355	0.0888889	0.0814815
chr11_5225487_5225488_-_T_A	(T-A)_+110_to_termination_codon	HBB	chr11	5225487	5225488	3'UTR	T	A	19.2213	16.7141	0.679851	no	72.304	78.2364	0.65614	no	0.412903	0.412903	0.0888889	0.0814815
chr11_5225487_5225488_-_T_C	NM_000518.4(HBB):c.*110T>C	HBB	chr11	5225487	5225488	3'UTR	T	C	19.2213	13.1997	0.324183	no	72.304	62.684	0.39452	no	0.412903	0.419355	0.0888889	0.0814815
chr11_5225487_5225488_-_T_G	(T-G)_+110_to_termination_codon	HBB	chr11	5225487	5225488	3'UTR	T	G	19.2213	35.0467	0.312243	no	72.304	59.2179	0.268788	no	0.412903	0.419355	0.0888889	0.0814815
chr11_5225489_5225490_-_A_C	(A-C)_+108_to_termination_codon	HBB	chr11	5225489	5225490	3'UTR	A	C					72.304	74.2841	0.927841	no	0.412903	0.419355	0.0888889	0.0814815
chr11_5225489_5225490_-_A_G	(A-G)_+108_to_termination_codon	HBB	chr11	5225489	5225490	3'UTR	A	G	19.2213	17.6668	0.859913	no	72.304	61.0501	0.343766	no	0.412903	0.419355	0.0888889	0.0814815
chr11_5225501_5225502_-_T_C	(T-C)_+96_to_termination_codon	HBB	chr11	5225501	5225502	3'UTR	T	C	19.2213	17.9672	0.850653	no	72.304	66.7344	0.657979	no	0.412903	0.419355	0.0888889	0.0888889
chr11_5225523_5225524_-_A_G	(A-G)_+74_to_termination_codon	HBB	chr11	5225523	5225524	3'UTR	A	G	53.9281	12.9416	0.000617074	yes	74.5475	87.1418	0.289832	no	0.406452	0.412903	0.0888889	0.0814815
chr11_5225550_5225551_-_C_G	(C-G)_+47_to_termination_codon	HBB	chr11	5225550	5225551	3'UTR	C	G	15.2716	33.5284	0.028334	yes	58.2805	82.0645	0.115322	no	0.445161	0.445161	0.0814815	0.0814815
chr11_5225565_5225566_-_A_C	(A-C)_+32_to_termination_codon	HBB	chr11	5225565	5225566	3'UTR	A	C	15.2716	16.114	0.858503	no	58.2805	58.5834	0.981631	no	0.445161	0.451613	0.0814815	0.0814815
chr11_5225591_5225592_-_C_G	NM_000518.4(HBB):c.*6C>G	HBB	chr11	5225591	5225592	3'UTR	C	G	15.2716	16.1727	0.870722	no					0.445161	0.445161	0.0814815	0.0814815
chr11_5232854_5232855_-_A_T	(A-T)_+109_to_termination_codon	HBD	chr11	5232854	5232855	3'UTR	A	T					97.8148	94.3102	0.885686	no	0.432258	0.432258	0.0814815	0.0814815
chr1_180271377_180271378_-_T_G	NM_033343.3(LHX4):c.452-2A>C	LHX4	chr1	180271377	180271378	3'UTR	T	G					64.805	64.2167	0.966039	no	0.587097	0.593548	0.037037	0.037037
chr12_102839030_102839031_-_A_G	(A-G)_+144_to_termination_codon	PAH	chr12	102839030	102839031	3'UTR	A	G					82.4229	70.2871	0.508742	no	0.36129	0.367742	0.0962963	0.0962963
chr13_110150327_110150328_-_C_A	(C-A)_+35_to_termination_codon	COL4A1	chr13	110150327	110150328	3'UTR	C	A	13.0086	33.6369	0.1668	no	76.8587	68.9342	0.59987	no	0.43871	0.432258	0.0814815	0.0814815
chr13_110150330_110150331_-_G_T	(G-T)_+32_to_termination_codon	COL4A1	chr13	110150330	110150331	3'UTR	G	T	13.0086	10.7689	0.681447	no	76.8587	62.3365	0.382173	no	0.43871	0.432258	0.0814815	0.0814815
chr13_110150331_110150332_-_G_T	(G-T)_+31_to_termination_codon	COL4A1	chr13	110150331	110150332	3'UTR	G	T	13.0086	14.3465	0.806613	no	76.8587	76.9777	0.995291	no	0.43871	0.432258	0.0814815	0.0814815
chr13_83878727_83878728_-_G_A	NM_052910.2(SLITRK1):c.*689G>A	SLITRK1	chr13	83878727	83878728	3'UTR	G	A	12.0858	13.0926	0.774037	no	75.2714	91.3923	0.36618	no	0.374194	0.367742	0.103704	0.103704
chr14_75958691_75958692_-_C_T	NM_003239.4(TGFB3):c.*495C>T	TGFB3	chr14	75958691	75958692	3'UTR	C	T	11.1002	17.1131	0.361733	no	58.6174	74.2822	0.119831	no	0.380645	0.374194	0.0814815	0.0814815
chr14_87934719_87934720_-_G_A	(G-A)_+12_to_termination_codon	GALC	chr14	87934719	87934720	3'UTR	G	A	23.789	36.3171	0.52513	no	59.3299	75.908	0.297707	no	0.4	0.393548	0.0740741	0.0740741
chr15_100892639_100892640_-_C_A	NM_000693.3(ALDH1A3):c.475+1G>T	ALDH1A3	chr15	100892639	100892640	3'UTR	C	A	8010.44	43.0894	0.0232465	yes	97.9213	71.6436	0.178657	no	0.503226	0.496774	0.0518519	0.0518519
chr15_100893010_100893011_-_C_T	NM_000693.3(ALDH1A3):c.537+5G>A	ALDH1A3	chr15	100893010	100893011	3'UTR	C	T	10.1524	24.8496	0.0411691	yes	67.6404	80.3364	0.333862	no	0.541935	0.535484	0.0518519	0.0518519
chr15_34788627_34788628_-_T_C	(T-C)_+1784_to_termination_codon	ACTC1	chr15	34788627	34788628	3'UTR	T	C					71.3917	91.1817	0.462693	no	0.445161	0.451613	0.111111	0.103704
chr16_288078_288079_-_G_A	(G-A)_+43_to_termination_codon	AXIN1	chr16	288078	288079	3'UTR	G	A					77.7002	55.9076	0.276804	no	0.63871	0.632258	0.037037	0.037037
chr17_43044406_43044407_-_T_C	(T-C)_+1271_to_termination_codon	BRCA1	chr17	43044406	43044407	3'UTR	T	C					76.6295	87.5118	0.59516	no	0.470968	0.477419	0.0740741	0.0740741
chr17_43044877_43044878_-_T_C	(T-C)_+800_to_termination_codon	BRCA1	chr17	43044877	43044878	3'UTR	T	C	17.3424	128.078	0.0143737	yes	78.5806	64.6304	0.47602	no	0.567742	0.574194	0.037037	0.037037
chr17_43044959_43044960_-_A_G	(A-G)_+718_to_termination_codon	BRCA1	chr17	43044959	43044960	3'UTR	A	G					84.6932	59.1	0.209063	no	0.503226	0.509677	0.0666667	0.0666667
chr17_43045149_43045150_-_G_C	(G-C)_+528_to_termination_codon	BRCA1	chr17	43045149	43045150	3'UTR	G	C					78.8431	36.5628	0.0456744	no	0.458065	0.458065	0.0444444	0.0444444
chr17_43045572_43045576_-_CTGT_-	NM_007294.3(BRCA1):c.*102_*105delCTGT	BRCA1	chr17	43045572	43045576	3'UTR	CTGT	-	14.3509	28.5964	0.245474	no	76.0141	76.7564	0.961438	no	0.493671	0.493506	0.0724638	0.0746269
chr17_43045619_43045620_-_C_T	(C-T)_+58_to_termination_codon	BRCA1	chr17	43045619	43045620	3'UTR	C	T					63.5269	51.2904	0.382954	no	0.56129	0.554839	0.0444444	0.0444444
chr17_43094420_43094421_-_T_-	NM_007299.3(BRCA1):c.787+323delT	BRCA1	chr17	43094420	43094421	3'UTR	T	-					79.9523	77.5929	0.858334	no	0.425806	0.428571	0.0666667	0.0671642
chr17_8173443_8173444_-_C_T	NR_033294.1(SNORD118):n.145C>T	SNORD118	chr17	8173443	8173444	3'UTR	C	T					70.1996	92.5179	0.279219	no	0.451613	0.445161	0.0666667	0.0666667
chr17_8173447_8173448_-_C_T	NR_033294.1(SNORD118):n.*5C>G	SNORD118	chr17	8173447	8173448	3'UTR	C	T	11.8383	41.2287	0.0954223	no	74.7123	96.8057	0.182539	no	0.445161	0.43871	0.0740741	0.0740741
chr17_8173530_8173531_-_A_G	NR_033294.1(SNORD118):n.58A>G	SNORD118	chr17	8173530	8173531	3'UTR	A	G	25.9328	80.7255	0.312455	no	65.5518	87.776	0.317054	no	0.490323	0.496774	0.0518519	0.0518519
chr17_8173531_8173532_-_G_A	NR_033294.1(SNORD118):n.57G>A	SNORD118	chr17	8173531	8173532	3'UTR	G	A	9.86461	35.1955	0.000838323	yes					0.483871	0.477419	0.0592593	0.0666667
chr17_8173636_8173642_-_TAGCTT_-	NR_033294.1(SNORD118):n.-54_-49del	SNORD118	chr17	8173636	8173642	3'UTR	TAGCTT	-	36.3905	24.1356	0.178369	no	85.0123	79.807	0.757046	no	0.475	0.480519	0.0714286	0.0671642
chr1_90916205_90916206_-_G_A	NM_201269.2(ZNF644):c.*592G>A	ZNF644	chr1	90916205	90916206	3'UTR	G	A	17.4652	15.4679	0.839192	no	71.8447	81.8165	0.47255	no	0.335484	0.329032	0.0962963	0.0962963
chr19_41966738_41966741_-_CTC_CTCCTC	NM_152296.4(ATP1A3):c.*196_*198dupCTC	ATP1A3	chr19	41966738	41966741	3'UTR	CTC	CTCCTC					82.3139	83.7919	0.911855	no	0.585987	0.5875	0.0218978	0.0214286
chr20_2467304_2467305_-_G_C	NM_003091.3(SNRPB):c.155+302G>C	SNRPB	chr20	2467304	2467305	3'UTR	G	C	37.0049	301.756	0.00143319	yes	68.5498	92.1566	0.125807	no	0.513889	0.513889	0.0564516	0.0564516
chr20_2467304_2467305_-_G_T	NM_003091.3(SNRPB):c.155+302G>T	SNRPB	chr20	2467304	2467305	3'UTR	G	T	37.0049	165.687	0.0146099	yes	68.5498	80.1137	0.411878	no	0.513889	0.506944	0.0564516	0.0564516
chr20_2467305_2467306_-_G_C	NM_003091.3(SNRPB):c.155+301G>C	SNRPB	chr20	2467305	2467306	3'UTR	G	C	37.0049	90.2695	0.0776216	no	68.5498	83.961	0.258767	no	0.513889	0.513889	0.0564516	0.0564516
chr20_761239_761240_-_A_C	NM_033409.3(SLC52A3):c.1198-2A>C	SLC52A3	chr20	761239	761240	3'UTR	A	C	15.9054	33.1379	0.218056	no	112.589	99.3568	0.500813	no	0.651613	0.658065	0.0222222	0.0222222
chr21_43774331_43774332_-_A_G	NM_000100.3(CSTB):c.169-2A>G	CSTB	chr21	43774331	43774332	3'UTR	A	G	24.3226	46.8524	0.154822	no	96.1584	90.6719	0.820611	no	0.593548	0.6	0.0222222	0.0222222
chr2_196847945_196847946_-_G_T	NM_024989.3(PGAP1):c.1952+1G>T	PGAP1	chr2	196847945	196847946	3'UTR	G	T	10.2701	60.3839	0.000216948	yes	71.7043	78.622	0.670394	no	0.335484	0.329032	0.111111	0.111111
chr2_218163327_218163328_-_G_A	(G-A)_+831_to_termination_codon	CXCR1	chr2	218163327	218163328	3'UTR	G	A	89.6903	33.2834	0.0556531	yes	85.3494	81.0563	0.831837	no	0.516129	0.509677	0.037037	0.037037
chr2_86217049_86217050_-_G_A	(G-A)_+50_to_termination_codon	REEP1	chr2	86217049	86217050	3'UTR	G	A	24.74	122.116	0.0624205	yes	98.1536	85.7469	0.603051	no	0.509677	0.503226	0.0296296	0.0296296
chr2_86217056_86217057_-_G_T	(G-T)_+43_to_termination_codon	REEP1	chr2	86217056	86217057	3'UTR	G	T	24.74	6.87646	0.000742929	yes	98.1536	57.9454	0.0406459	no	0.509677	0.503226	0.0296296	0.0296296
chr2_86217085_86217086_-_C_T	(C-T)_+14_to_termination_codon	REEP1	chr2	86217085	86217086	3'UTR	C	T	24.74	18.2837	0.576123	no	98.1536	91.1123	0.761666	no	0.509677	0.503226	0.0296296	0.0296296
chr3_138944972_138944973_-_C_A	(C-A)_+619_to_termination_codon	FOXL2	chr3	138944972	138944973	3'UTR	C	A					61.45	61.7533	0.987363	no	0.703226	0.696774	0.037037	0.037037
chr3_169764668_169764670_-_CC_-	NR_001566.1(TERC):n.391_392delCC	TERC	chr3	169764668	169764670	3'UTR	CC	-	14.4955	53.3929	0.116242	no	78.3247	94.4847	0.47925	no	0.653846	0.649351	0.0147059	0.0149254
chr3_169764737_169764738_-_C_T	NR_001566.1(TERC):n.323C>T	TERC	chr3	169764737	169764738	3'UTR	C	T	19.1064	87.0527	0.0409348	yes	75.4287	74.8464	0.979381	no	0.658065	0.651613	0.0148148	0.0148148
chr3_169764738_169764739_-_G_A	NR_001566.1(TERC):n.322G>A	TERC	chr3	169764738	169764739	3'UTR	G	A					79.2193	132.982	0.0991259	no	0.658065	0.651613	0.0148148	0.0148148
chr3_169764755_169764756_-_G_A	NR_001566.1(TERC):n.305G>A	TERC	chr3	169764755	169764756	3'UTR	G	A	56.8892	41.8331	0.828176	no	70.3386	50.6056	0.255091	no	0.677419	0.670968	0.0148148	0.0148148
chr3_169764880_169764881_-_C_T	NR_001566.1(TERC):n.180C>T	TERC	chr3	169764880	169764881	3'UTR	C	T					101.79	69.5497	0.0908771	no	0.632258	0.625806	0.0222222	0.0296296
chr3_169764882_169764883_-_G_A	NR_001566.1(TERC):n.178G>A	TERC	chr3	169764882	169764883	3'UTR	G	A	17.2267	17.7505	0.962424	no	77.3846	77.4398	0.99765	no	0.632258	0.625806	0.0222222	0.0296296
chr3_169764917_169764918_-_G_A	NR_001566.1(TERC):n.143G>A	TERC	chr3	169764917	169764918	3'UTR	G	A	29.0665	143.995	0.0700092	no	76.3721	97.4872	0.300738	no	0.580645	0.574194	0.0222222	0.0222222
chr3_169764937_169764952_-_TGACTTTCAGCGGGC_-	NR_001566.1(TERC):n.109_123delTGACTTTCAGCGGGC	TERC	chr3	169764937	169764952	3'UTR	TGACTTTCAGCGGGC	-					44.1234	86.1413	0.0092186	no	0.56213	0.558442	0.033557	0.0373134
chr3_169764943_169764944_-_A_C	NR_001566.1(TERC):n.117A>C	TERC	chr3	169764943	169764944	3'UTR	A	C	17.9982	2564.26	0.00335377	yes	82.3151	86.0532	0.910395	no	0.580645	0.587097	0.0296296	0.0296296
chr3_169764944_169764945_-_C_T	NR_001566.1(TERC):n.116C>T	TERC	chr3	169764944	169764945	3'UTR	C	T	11.0196	45.6407	0.097215	no	82.3564	131.952	0.10788	no	0.580645	0.574194	0.0296296	0.037037
chr3_169764947_169764951_-_GACT_-	NR_001566.1(TERC):n.110_113delGACT	TERC	chr3	169764947	169764951	3'UTR	GACT	-	18.8046	40.8845	0.288454	no	67.2057	77.0174	0.540451	no	0.582278	0.584416	0.0362319	0.0373134
chr3_169764952_169764954_-_GC_AG	NR_001566.1(TERC):n.107_108delGCinsAG	TERC	chr3	169764952	169764954	3'UTR	GC	AG	18.1553	51.5269	0.282	no	46.8327	81.2069	0.00624903	no	0.596154	0.589744	0.0367647	0.0367647
chr3_169764960_169764961_-_T_A	NR_001566.1(TERC):n.100T>A	TERC	chr3	169764960	169764961	3'UTR	T	A					67.0682	96.9148	0.0560679	no	0.593548	0.593548	0.037037	0.0444444
chr3_169764962_169764963_-_G_A	NR_001566.1(TERC):n.98G>A	TERC	chr3	169764962	169764963	3'UTR	G	A	142.006	46.526	0.19354	no	92.6776	98.5987	0.69838	no	0.587097	0.580645	0.037037	0.0444444
chr3_169764963_169764965_-_CT_-	NR_001566.1(TERC):n.96_97delCT	TERC	chr3	169764963	169764965	3'UTR	CT	-	28.6602	65.5318	0.244891	no	73.7273	74.1746	0.973761	no	0.583333	0.584416	0.0367647	0.0373134
chr3_169764981_169764982_-_C_-	NR_001566.1(TERC):n.79delC	TERC	chr3	169764981	169764982	3'UTR	C	-	62.9227	47.7689	0.220913	no	86.9211	88.1255	0.951984	no	0.580645	0.577922	0.037037	0.0373134
chr3_169764988_169764989_-_C_G	NR_001566.1(TERC):n.72C>G	TERC	chr3	169764988	169764989	3'UTR	C	G	91.0357	58.8749	0.592127	no	73.5629	55.7991	0.188994	no	0.580645	0.580645	0.037037	0.037037
chr3_169765003_169765007_-_AACT_-	NR_001566.1(TERC):n.54_57delAACT	TERC	chr3	169765003	169765007	3'UTR	AACT	-	27.7349	29.9567	0.894945	no					0.588608	0.597403	0.0362319	0.0298507
chr3_169765012_169765013_-_A_G	NR_001566.1(TERC):n.48A>G	TERC	chr3	169765012	169765013	3'UTR	A	G	48.1258	37.3727	0.326803	no	61.5152	72.8261	0.446146	no	0.587097	0.593548	0.037037	0.0296296
chr3_169765025_169765026_-_C_T	NR_001566.1(TERC):n.35C>T	TERC	chr3	169765025	169765026	3'UTR	C	T	48.1258	33.4495	0.0365153	no	61.5152	88.2094	0.0440951	no	0.587097	0.580645	0.037037	0.037037
chr3_169765026_169765033_-_GTGGTGG_-	NR_001566.1(TERC):n.28_34delGTGGTGG	TERC	chr3	169765026	169765033	3'UTR	GTGGTGG	-	32.699	56.8239	0.0664926	no	49.1176	72.2243	0.0619857	no	0.596273	0.590909	0.035461	0.0373134
chr3_169765058_169765059_-_G_C	NR_001566.1(TERC):n.2G>C	TERC	chr3	169765058	169765059	3'UTR	G	C	48.1258	41.6377	0.535389	no	61.5152	77.1986	0.254002	no	0.587097	0.587097	0.037037	0.037037
chr3_24122874_24122875_-_G_A	(G-A)_+9_to_termination_codon	THRB	chr3	24122874	24122875	3'UTR	G	A	76.0646	351.565	0.22089	no	76.4644	71.2745	0.632996	no	0.43871	0.432258	0.0518519	0.0518519
chr4_127932981_127932981_-_-_T	NM_152778.2(MFSD8):c.863+3_863+4insT	MFSD8	chr4	127932981	127932981	3'UTR	-	T	58.847	13.7348	0.00828457	yes	79.7078	83.2252	0.858742	no	0.344156	0.341935	0.11194	0.118519
chr4_89726163_89726164_-_C_A	(C-A)_+464_to_termination_codon	SNCA	chr4	89726163	89726164	3'UTR	C	A					96.8573	56.3768	0.0313752	no	0.309677	0.303226	0.140741	0.140741
chr5_150056111_150056112_-_C_T	NM_005211.3:c.2467C>T	CSF1R	chr5	150056111	150056112	3'UTR	C	T	231.7	58.0376	0.198861	no	88.2026	84.5076	0.849664	no	0.565789	0.559211	0.030303	0.030303
chr5_173233209_173233210_-_G_T	NM_004387.3(NKX2-5):c.335-1G>T	NKX2-5	chr5	173233209	173233210	3'UTR	G	T					90.1188	73.6458	0.278786	no	0.612903	0.606452	0.0296296	0.037037
chr5_33951547_33951551_-_AAGT_-	del_4_bp_non-coding_DNA_c.1156+3_1156+6delAAGT	SLC45A2	chr5	33951547	33951551	3'UTR	AAGT	-	24.0957	67.8655	0.00431675	yes	69.9944	99.6882	0.0380929	no	0.449367	0.454545	0.0507246	0.0447761
chr7_107661636_107661637_-_T_C	NM_000441.1(SLC26A4):c.-3-2A>G	SLC26A4	chr7	107661636	107661637	3'UTR	T	C					117.319	97.9972	0.210461	no	0.670968	0.677419	0.0296296	0.0296296
chr9_32973653_32973654_-_A_G	NM_175073.2(APTX):c.875-2A>G	APTX	chr9	32973653	32973654	3'UTR	A	G	42.4836	167.598	0.016126	yes	76.4502	79.4541	0.853836	no	0.529032	0.535484	0.037037	0.037037
chr9_34635580_34635581_-_G_T	(G-T)_+51_to_termination_codon	SIGMAR1	chr9	34635580	34635581	3'UTR	G	T					53.7408	78.2055	0.00407671	no	0.574194	0.567742	0.0444444	0.0444444
chr9_35657871_35657872_-_G_A	NR_003051.3(RMRP):r.147G>A	RMRP	chr9	35657871	35657872	3'UTR	G	A					100.522	102.968	0.944215	no	0.619355	0.612903	0.037037	0.037037
chr9_35657926_35657928_-_AG_GC	NR_003051.3(RMRP):n.91_92delAGinsGC	RMRP	chr9	35657926	35657928	3'UTR	AG	GC					79.8545	69.5931	0.501196	no	0.602564	0.608974	0.0367647	0.0367647
chr9_70810047_70810048_-_C_T	NR_029621.1(MIR204):n.37C>T	MIR204	chr9	70810047	70810048	3'UTR	C	T					74.738	95.9318	0.410303	no	0.5	0.493333	0.0461538	0.0461538
chrX_49250455_49250456_-_A_G	(A-G)_+878_to_termination_codon	FOXP3	chrX	49250455	49250456	3'UTR	A	G					61.5601	84.7202	0.225773	no	0.548387	0.554839	0.0518519	0.0518519
chrX_49250457_49250458_-_A_G	(A-G)_+876_to_termination_codon	FOXP3	chrX	49250457	49250458	3'UTR	A	G					61.5601	101.701	0.130741	no	0.548387	0.554839	0.0518519	0.0444444
chrX_71107427_71107428_-_A_G	(A-G)_+308_to_termination_codon	IL2RG	chrX	71107427	71107428	3'UTR	A	G	15.8964	41.1544	0.379844	no	79.4543	74.5904	0.784827	no	0.464516	0.470968	0.037037	0.037037
chr10_98417551_98417552_-_C_T	NM_000195.4(HPS1):c.*12C>T	HPS1	chr10	98417551	98417552	3'UTR	C	T	14.3569	58.8174	0.0105006	yes	59.4626	78.6871	0.360938	no	0.6	0.593548	0.0222222	0.0222222
chr11_119096570_119096571_-_T_G	NM_001382.3(DPAGT1):c.*427T>G	DPAGT1;HMBS	chr11	119096570	119096571	3'UTR	T	G					83.2446	72.3955	0.531184	no	0.445161	0.451613	0.0592593	0.0518519
chr11_2163955_2163956_-_G_A	NM_000360.3(TH):c.*277G>A	INS;TH	chr11	2163955	2163956	3'UTR	G	A	26.0359	32.5686	0.439435	no	70.0321	68.2898	0.909467	no	0.587097	0.580645	0.0296296	0.0296296
chr11_32389054_32389055_-_G_T	(G-T)_+3_to_termination_codon	WT1	chr11	32389054	32389055	3'UTR	G	T	31.5495	148.971	0.15297	no	57.2151	65.1362	0.41413	no	0.522581	0.516129	0.0222222	0.0222222
chr11_36592532_36592533_-_T_A	NM_000536.3(RAG2):c.*52T>A	RAG2	chr11	36592532	36592533	3'UTR	T	A					89.6666	72.2372	0.308971	no	0.303226	0.303226	0.0814815	0.0814815
chr11_5225479_5225480_-_A_G	(A-G)_+118_to_termination_codon	HBB	chr11	5225479	5225480	3'UTR	A	G					72.304	59.2115	0.308011	no	0.412903	0.419355	0.0888889	0.0888889
chr1_171635851_171635852_-_G_C	(G-C)_+73_to_termination_codon	MYOC	chr1	171635851	171635852	3'UTR	G	C					89.0963	89.7849	0.970202	no	0.567742	0.567742	0.0296296	0.0296296
chr12_102839155_102839156_-_G_T	(G-T)_+19_to_termination_codon	PAH	chr12	102839155	102839156	3'UTR	G	T					139.146	52.9192	1.30529e-07	yes	0.419355	0.412903	0.0444444	0.0444444
chr12_2668924_2668925_-_C_T	NM_000719.6(CACNA1C):c.4624-8G>A	CACNA1C	chr12	2668924	2668925	3'UTR	C	T					96.4861	88.7072	0.770136	no	0.574194	0.567742	0.0222222	0.0222222
chr1_230703050_230703051_-_T_C	(T-C)_+90_to_termination_codon	AGT	chr1	230703050	230703051	3'UTR	T	C					52.5052	94.6333	0.00254672	no	0.548387	0.554839	0.0296296	0.0296296
chr12_32746843_32746844_-_A_G	NM_001040436.2(YARS2):c.*360A>G	DNM1L;YARS2	chr12	32746843	32746844	3'UTR	A	G	217.888	69.0079	0.708001	no	112.742	88.6309	0.512686	no	0.509677	0.516129	0.0444444	0.0444444
chr12_32746973_32746974_-_A_G	NM_001040436.2(YARS2):c.*230A>G	DNM1L;YARS2	chr12	32746973	32746974	3'UTR	A	G	17.6095	12.7084	0.136141	no	80.9749	87.2369	0.760748	no	0.348387	0.354839	0.0888889	0.0888889
chr12_32747061_32747062_-_T_C	NM_001040436.2(YARS2):c.*142T>C	DNM1L;YARS2	chr12	32747061	32747062	3'UTR	T	C	9.97941	31.4338	0.000510438	yes	73.8716	83.8278	0.538923	no	0.367742	0.374194	0.0962963	0.0962963
chr12_32747076_32747078_-_AG_-	NM_001040436.2(YARS2):c.*126_*127delAG	DNM1L;YARS2	chr12	32747076	32747078	3'UTR	AG	-					95.8796	91.1152	0.852214	no	0.397436	0.396104	0.0955882	0.0970149
chr12_32747141_32747142_-_G_A	NM_001040436.2(YARS2):c.*62G>A	DNM1L;YARS2	chr12	32747141	32747142	3'UTR	G	A					76.925	65.8244	0.502114	no	0.43871	0.432258	0.0518519	0.0518519
chr1_235830421_235830422_-_C_T	NM_000081.3(LYST):c.-5C>T	LYST	chr1	235830421	235830422	3'UTR	C	T	241.533	286.674	0.968587	no					0.56129	0.554839	0.0222222	0.0222222
chr1_26890735_26890736_-_C_T	(C-T)_+274_to_termination_codon	GPATCH3	chr1	26890735	26890736	3'UTR	C	T	201.442	43.3758	0.443266	no					0.529032	0.522581	0.037037	0.037037
chr1_26890746_26890747_-_C_T	(C-T)_+263_to_termination_codon	GPATCH3	chr1	26890746	26890747	3'UTR	C	T	104.434	84.8606	0.912675	no	80.0769	76.0489	0.834933	no	0.535484	0.529032	0.0444444	0.0444444
chr13_20188899_20188900_-_C_T	NM_004004.5(GJB2):c.*1C>T	GJB2	chr13	20188899	20188900	3'UTR	C	T	549.355	12.8937	0.00411918	yes	68.3234	75.8971	0.646066	no	0.496774	0.490323	0.0518519	0.0518519
chr13_43213954_43213955_-_A_G	(A-G)_+35_to_termination_codon	ENOX1	chr13	43213954	43213955	3'UTR	A	G	57.4001	18.375	0.00200998	yes					0.580645	0.587097	0.0148148	0.0148148
chr13_51934740_51934741_-_C_T	NM_000053.3(ATP7B):c.*15C>T	ATP7B	chr13	51934740	51934741	3'UTR	C	T					215.588	100.816	0.0913102	no	0.625806	0.619355	0.0222222	0.0222222
chr13_83878124_83878125_-_G_A	(G-A)_+1292_to_termination_codon	SLITRK1	chr13	83878124	83878125	3'UTR	G	A	82.1222	17.8016	0.0512398	yes	83.2221	75.8052	0.703465	no	0.496774	0.490323	0.0814815	0.0814815
chr1_40073531_40073535_-_ATCA_-	NM_000310.3(PPT1):c.*526_*529delATCA	PPT1	chr1	40073531	40073535	3'UTR	ATCA	-	15.2141	30.5755	0.126564	no	73.2568	65.6623	0.594447	no	0.468354	0.474026	0.0652174	0.0597015
chr1_40074057_40074058_-_C_A	NM_000310.3(PPT1):c.*3C>A	PPT1	chr1	40074057	40074058	3'UTR	C	A	22.9776	6.90673	0.0163721	yes	65.7929	81.8361	0.501914	no	0.509677	0.503226	0.0518519	0.0518519
chr14_22813415_22813416_-_G_A	NM_001126106.2(SLC7A7):c.-18G>A	SLC7A7	chr14	22813415	22813416	3'UTR	G	A					77.1797	104.068	0.315124	no	0.574194	0.567742	0.0222222	0.0222222
chr1_46193388_46193390_-_AG_-	NM_017739.3(POMGNT1):c.1027-2_1027-1delAG	POMGNT1	chr1	46193388	46193390	3'UTR	AG	-					104.875	83.3702	0.457105	no	0.576923	0.577922	0.0220588	0.0223881
chr15_41397064_41397065_-_T_G	NM_016013.3(NDUFAF1):c.-6T>G	NDUFAF1	chr15	41397064	41397065	3'UTR	T	G	27.588	12.0824	0.0433966	yes	68.62	91.8901	0.373649	no	0.43871	0.445161	0.0518519	0.0518519
chr15_68207979_68207981_-_GT_GTGT	NM_017882.2(CLN6):c.*159_*160dupGT	CLN6	chr15	68207979	68207981	3'UTR	GT	GTGT	31.8982	35.7085	0.725813	no	62.0235	54.9412	0.53475	no	0.50641	0.506329	0.0441176	0.0434783
chr15_99973382_99973388_-_AGCCCA_-	NM_139057.3(ADAMTS17):c.*1014_*1019delAGCCCA	ADAMTS17	chr15	99973382	99973388	3'UTR	AGCCCA	-	85.2267	27.2661	0.245412	no	52.3995	69.2014	0.228379	no	0.55625	0.551948	0.05	0.0522388
chr16_11549451_11549452_-_T_C	(T-C)_+185_to_termination_codon	LITAF	chr16	11549451	11549452	3'UTR	T	C	79.8609	84.9799	0.936966	no	78.6472	93.9729	0.414285	no	0.490323	0.496774	0.037037	0.037037
chr16_11553519_11553520_-_C_G	NM_004862.3(LITAF):c.377+13C>G	LITAF	chr16	11553519	11553520	3'UTR	C	G					109.967	111.562	0.94683	no	0.589041	0.589041	0.015873	0.015873
chr16_1510941_1510942_-_G_A	NM_014714.3(IFT140):c.*2G>A	IFT140	chr16	1510941	1510942	3'UTR	G	A	47.1272	12.1927	0.0918513	no	70.7373	66.9348	0.738389	no	0.522581	0.516129	0.0148148	0.0148148
chr16_23603312_23603313_-_A_G	(A-G)_+146_to_termination_codon	PALB2	chr16	23603312	23603313	3'UTR	A	G	31.9431	13.5252	0.0250151	yes	89.4634	70.2144	0.274262	no	0.374194	0.380645	0.0888889	0.0888889
chr16_3243131_3243132_-_C_T	(C-T)_+9_to_termination_codon	MEFV	chr16	3243131	3243132	3'UTR	C	T					75.1726	64.4936	0.56399	no	0.529032	0.522581	0.037037	0.0444444
chr16_81082963_81082964_-_G_T	NM_004483.4(GCSH):c.425-1G>T	GCSH	chr16	81082963	81082964	3'UTR	G	T	20.4216	20.5252	0.983512	no	67.0767	65.9747	0.93472	no	0.406452	0.4	0.0666667	0.0666667
chr16_84177858_84177859_-_A_G	NM_178452.5(DNAAF1):c.*18T>C	DNAAF1	chr16	84177858	84177859	3'UTR	A	G					55.3232	78.3806	0.167788	no	0.43871	0.445161	0.0962963	0.0888889
chr16_88809515_88809516_-_A_G	NM_000485.2(APRT):c.*182A>G	APRT;GALNS	chr16	88809515	88809516	3'UTR	A	G					124.269	51.7487	0.0636303	no	0.554839	0.56129	0.0296296	0.0296296
chr17_43044538_43044539_-_G_T	(G-T)_+1139_to_termination_codon	BRCA1	chr17	43044538	43044539	3'UTR	G	T	16.9176	15.562	0.735688	no	73.4446	75.6522	0.890992	no	0.412903	0.406452	0.0592593	0.0592593
chr17_43045386_43045387_-_C_T	(C-T)_+291_to_termination_codon	BRCA1	chr17	43045386	43045387	3'UTR	C	T					92.5738	80.6797	0.492648	no	0.43871	0.432258	0.0666667	0.0740741
chr17_43125259_43125260_-_C_T	NM_007294.3(BRCA1):c.-20+11C>T	BRCA1	chr17	43125259	43125260	3'UTR	C	T	218.219	56.9555	0.253386	no	70.7994	86.7413	0.44656	no	0.619355	0.612903	0.0444444	0.0444444
chr17_4898729_4898730_-_A_G	NM_000080.3(CHRNE):c.*6A>G	CHRNE	chr17	4898729	4898730	3'UTR	A	G					93.769	64.2777	0.130757	no	0.509677	0.516129	0.037037	0.037037
chr17_4898730_4898731_-_C_T	NM_000080.3(CHRNE):c.*5C>T	CHRNE	chr17	4898730	4898731	3'UTR	C	T	20.215	15665.3	0.000644803	yes	93.769	76.8735	0.471085	no	0.509677	0.503226	0.037037	0.0444444
chr17_50185257_50185259_-_AA_AAAA	NM_000088.3(COL1A1):c.*243_*244dupAA	COL1A1	chr17	50185257	50185259	3'UTR	AA	AAAA					56.5538	63.2285	0.470239	no	0.365385	0.360759	0.0514706	0.0507246
chr17_7219948_7219949_-_T_C	NM_000018.3(ACADVL):c.-36A>G	ACADVL	chr17	7219948	7219949	3'UTR	T	C	12.6993	98.5584	0.00199248	yes					0.658065	0.664516	0.0222222	0.0222222
chr17_7668433_7668434_-_A_C	NM_000546.5(TP53):c.*1175A>C	TP53	chr17	7668433	7668434	3'UTR	A	C	24.4752	25.8997	0.854603	no	53.7006	46.2429	0.244764	no	0.458065	0.464516	0.0666667	0.0666667
chr17_8121014_8121015_-_A_G	(A-G)_+556_to_termination_codon	HES7	chr17	8121014	8121015	3'UTR	A	G	30.6916	38.3406	0.767754	no	90.0413	94.2143	0.839527	no	0.43871	0.445161	0.0518519	0.0518519
chr18_59435893_59435894_-_C_T	NM_133459.3(CCBE1):c.*14C>T	CCBE1	chr18	59435893	59435894	3'UTR	C	T					60.735	93.0458	0.0851829	no	0.458065	0.451613	0.0444444	0.0444444
chr18_62138237_62138238_-_G_C	NM_176787.4(PIGN):c.1172+5G>C	PIGN	chr18	62138237	62138238	3'UTR	G	C	24.6887	24.9159	0.984626	no	94.5835	93.8276	0.9728	no	0.354839	0.354839	0.103704	0.103704
chr1_90916785_90916786_-_C_G	(C-G)_+12_to_termination_codon	ZNF644	chr1	90916785	90916786	3'UTR	C	G					82.3763	77.2476	0.796607	no	0.354839	0.354839	0.0888889	0.0888889
chr19_35826371_35826372_-_T_C	(T-C)_+142_to_termination_codon	NPHS1	chr19	35826371	35826372	3'UTR	T	C	28.5703	117.703	0.175012	no	64.4812	64.2192	0.983541	no	0.535484	0.541935	0.037037	0.037037
chr19_48968419_48968420_-_A_G	NM_002103.4(GYS1):c.*868A>G	FTL;GYS1	chr19	48968419	48968420	3'UTR	A	G	59.1435	12.1454	0.0185773	yes	83.9172	90.4431	0.715487	no	0.529032	0.535484	0.0740741	0.0666667
chr19_48968628_48968629_-_C_T	NM_002103.4(GYS1):c.*659C>T	FTL;GYS1	chr19	48968628	48968629	3'UTR	C	T	390.936	19.8215	0.00244204	yes	96.3042	80.5423	0.388509	no	0.554839	0.548387	0.0296296	0.037037
chr19_48968917_48968918_-_A_C	NM_002103.4(GYS1):c.*370A>C	FTL;GYS1	chr19	48968917	48968918	3'UTR	A	C	11.3175	16.9488	0.372225	no	107.105	78.7884	0.272791	no	0.574194	0.580645	0.0444444	0.0444444
chr21_25881651_25881652_-_C_T	(C-T)_+18_to_termination_codon	APP	chr21	25881651	25881652	3'UTR	C	T	58.0455	22.7007	0.119614	no	92.2549	96.0711	0.864332	no	0.470968	0.464516	0.0592593	0.0592593
chr21_36460965_36460966_-_G_C	NM_001146077.1(CLDN14):c.*10G>C	CLDN14	chr21	36460965	36460966	3'UTR	G	C					90.1675	75.5391	0.367173	no	0.580645	0.580645	0.0296296	0.0296296
chr21_43053339_43053340_-_G_A	NM_000071.2(CBS):c.*540G>A	CBS	chr21	43053339	43053340	3'UTR	G	A	60.3372	136.465	0.64695	no	88.8666	79.4916	0.647034	no	0.509677	0.503226	0.037037	0.037037
chr21_46136369_46136370_-_C_A	NM_006657.2(FTCD):c.*127C>A	COL6A2;FTCD	chr21	46136369	46136370	3'UTR	C	A					84.9917	83.7021	0.94223	no	0.606452	0.6	0.0222222	0.0222222
chr21_46136429_46136430_-_C_T	NM_006657.2(FTCD):c.*67C>T	COL6A2;FTCD	chr21	46136429	46136430	3'UTR	C	T					76.8453	76.9747	0.993023	no	0.612903	0.606452	0.0296296	0.0296296
chr2_151839114_151839115_-_T_C	NM_000726.4(CACNB4):c.*4T>C	CACNB4	chr2	151839114	151839115	3'UTR	T	C					71.4153	76.3442	0.711833	no	0.412903	0.419355	0.0962963	0.0888889
chr2_214728537_214728538_-_A_AA	NM_000465.3(BARD1):c.*137dupA	BARD1	chr2	214728537	214728538	3'UTR	A	AA					65.2288	66.6279	0.889951	no	0.348387	0.346154	0.0814815	0.0808824
chr2_218163910_218163911_-_G_A	(G-A)_+248_to_termination_codon	CXCR1	chr2	218163910	218163911	3'UTR	G	A					103.768	92.3406	0.665767	no	0.522581	0.516129	0.0444444	0.0444444
chr2_218163911_218163912_-_C_T	(C-T)_+247_to_termination_codon	CXCR1	chr2	218163911	218163912	3'UTR	C	T					80.5081	76.8904	0.845183	no	0.522581	0.516129	0.0444444	0.0444444
chr2_227687388_227687389_-_G_A	NM_025243.3(SLC19A3):c.*8G>A	SLC19A3	chr2	227687388	227687389	3'UTR	G	A	12.4079	19.2084	0.38876	no	111	56.0392	0.020642	no	0.432258	0.425806	0.0518519	0.0518519
chr22_28687878_28687879_-_C_T	NM_007194.3(CHEK2):c.*18C>T	CHEK2	chr22	28687878	28687879	3'UTR	C	T	21.9093	8.31794	2.66923e-05	yes	84.5085	75.9694	0.588169	no	0.367742	0.36129	0.0666667	0.0666667
chr22_28687889_28687890_-_T_C	NM_007194.3(CHEK2):c.*7T>C	CHEK2	chr22	28687889	28687890	3'UTR	T	C	21.9093	31.8773	0.293582	no	84.5085	91.2254	0.638515	no	0.367742	0.374194	0.0666667	0.0666667
chr22_28687891_28687892_-_C_T	NM_007194.3(CHEK2):c.*5C>T	CHEK2	chr22	28687891	28687892	3'UTR	C	T					84.5085	68.9387	0.214609	no	0.367742	0.36129	0.0666667	0.0666667
chr22_50625048_50625049_-_A_G	NM_000487.5(ARSA):c.*96A>G	ARSA	chr22	50625048	50625049	3'UTR	A	G	73.7787	41.0014	0.196581	no	51.5875	86.9986	0.00882874	no	0.541935	0.548387	0.0444444	0.0444444
chr2_26458111_26458112_-_G_A	NM_194248.2(OTOF):c.*126G>A	OTOF	chr2	26458111	26458112	3'UTR	G	A					85.8208	67.9143	0.342	no	0.554839	0.548387	0.0444444	0.0518519
chr2_26458132_26458133_-_C_T	NM_194248.2(OTOF):c.*105C>T	OTOF	chr2	26458132	26458133	3'UTR	C	T	65.4296	14.0204	0.000977707	yes	72.682	56.7727	0.264522	no	0.554839	0.548387	0.037037	0.0444444
chr2_69326166_69326167_-_C_A	(C-A)_+22_to_termination_codon	GFPT1	chr2	69326166	69326167	3'UTR	C	A					161.517	82.1466	0.0169088	no	0.36129	0.354839	0.103704	0.103704
chr2_73958142_73958143_-_A_G	NM_080916.2(DGUOK):c.708-3T>C	DGUOK	chr2	73958142	73958143	3'UTR	A	G					91.7352	83.2679	0.779075	no	0.451613	0.458065	0.037037	0.0296296
chr3_123612927_123612931_-_CTTA_CTTACTTA	NM_053025.3(MYLK):c.*1174_*1177dupCTTA	MYLK	chr3	123612927	123612931	3'UTR	CTTA	CTTACTTA	19.9919	111.247	0.0166309	yes	66.3976	77.773	0.410759	no	0.35443	0.351852	0.0797101	0.084507
chr3_14145807_14145808_-_G_A	NM_004628.4(XPC):c.*133G>A	TMEM43;XPC	chr3	14145807	14145808	3'UTR	G	A					69.3883	81.2632	0.232758	no	0.63871	0.632258	0.0148148	0.0148148
chr3_169764679_169764680_-_G_A	NR_001566.1(TERC):n.381G>A	TERC	chr3	169764679	169764680	3'UTR	G	A					114.804	88.9594	0.314974	no	0.664516	0.658065	0.0148148	0.0148148
chr3_169764754_169764755_-_T_G	NR_001566.1(TERC):n.306T>G	TERC	chr3	169764754	169764755	3'UTR	T	G	78.3135	206.4	0.313242	no	93.354	72.784	0.202052	no	0.677419	0.683871	0.0148148	0.0148148
chr3_169765002_169765003_-_G_A	NR_001566.1(TERC):n.58G>A	TERC	chr3	169765002	169765003	3'UTR	G	A	48.1258	160.593	0.0014466	yes	61.5152	85.2806	0.0890901	no	0.587097	0.580645	0.037037	0.0444444
chr3_169765023_169765024_-_A_G	NR_001566.1(TERC):n.37A>G	TERC	chr3	169765023	169765024	3'UTR	A	G	48.1258	84.8797	0.0512263	no	61.5152	70.4911	0.446952	no	0.587097	0.593548	0.037037	0.037037
chr3_170997894_170997895_-_A_-	NM_000340.1(SLC2A2):c.*8delA	SLC2A2	chr3	170997894	170997895	3'UTR	A	-	54.6134	49.7787	0.910861	no	85.6548	61.5686	0.101665	no	0.354839	0.357143	0.0740741	0.0746269
chr3_180989630_180989631_-_G_T	NM_145261.3(DNAJC19):c.-29G>T	DNAJC19	chr3	180989630	180989631	3'UTR	G	T	74.6985	13.3799	0.0394231	yes					0.632258	0.625806	0.0222222	0.0222222
chr3_183015436_183015437_-_A_T	NM_020166.4(MCCC1):c.*1A>T	MCCC1	chr3	183015436	183015437	3'UTR	A	T					63.6985	40.9503	0.0355126	no	0.464516	0.464516	0.0592593	0.0592593
chr3_49422504_49422505_-_C_T	NM_000481.3(AMT):c.-55C>T	AMT	chr3	49422504	49422505	3'UTR	C	T					63.3388	97.374	0.156906	no	0.619355	0.612903	0.0222222	0.0222222
chr3_55468138_55468139_-_T_TT	NM_003392.4(WNT5A):c.*1953dupT	WNT5A	chr3	55468138	55468139	3'UTR	T	TT					72.7837	56.1717	0.336032	no	0.387097	0.384615	0.0888889	0.0882353
chr3_87259754_87259755_-_T_TT	NM_000306.3(POU1F1):c.*139dupT	CHMP2B;POU1F1	chr3	87259754	87259755	3'UTR	T	TT					91.5509	83.9793	0.609682	no	0.270968	0.269231	0.125926	0.125
chr4_110617670_110617671_-_C_T	NM_153427.2(PITX2):c.*454C>T	PITX2	chr4	110617670	110617671	3'UTR	C	T	28.2871	11.1684	0.022357	yes	86.1404	48.1726	0.00965808	no	0.387097	0.380645	0.118519	0.118519
chr4_127920837_127920838_-_A_G	NM_152778.2(MFSD8):c.1351-2A>G	MFSD8	chr4	127920837	127920838	3'UTR	A	G	33.231	20.0064	0.553491	no	79.7607	62.1281	0.336807	no	0.496774	0.503226	0.0666667	0.0666667
chr4_127920844_127920845_-_C_T	NM_152778.2(MFSD8):c.1351-9C>T	MFSD8	chr4	127920844	127920845	3'UTR	C	T	24.6616	47.7561	0.233782	no	92.3552	87.9303	0.852911	no	0.470968	0.464516	0.0666667	0.0666667
chr4_144872607_144872608_-_G_A	(G-A)_+122765_to_termination_codon	ANAPC10	chr4	144872607	144872608	3'UTR	G	A					76.8995	108.936	0.197248	no	0.425806	0.419355	0.0592593	0.0592593
chr4_55435195_55435196_-_G_T	(G-T)_+219_to_termination_codon	CLOCK	chr4	55435195	55435196	3'UTR	G	T					56.7978	81.8853	0.0902489	no	0.445161	0.43871	0.0888889	0.0888889
chr5_132638216_132638228_-_CCTGCCTTTTGT_-	NM_005732.3(RAD50):c.3612_3618+5delACAAAAGGCAGG	RAD50	chr5	132638216	132638228	3'UTR	CCTGCCTTTTGT	-					57.1651	77.9247	0.265964	no	0.524096	0.525974	0.0547945	0.0597015
chr5_132638223_132638224_-_C_T	NM_005732.3(RAD50):c.3618+1G>A	RAD50	chr5	132638223	132638224	3'UTR	C	T	72.5227	39.8263	0.309019	no	78.4553	80.8843	0.894578	no	0.529032	0.522581	0.0518519	0.0518519
chr5_173232272_173232273_-_G_C	(G-C)_+296_to_termination_codon	NKX2-5	chr5	173232272	173232273	3'UTR	G	C					77.0405	62.1049	0.319699	no	0.683871	0.683871	0.0148148	0.0148148
chr5_173233370_173233371_-_G_A	NM_004387.3(NKX2-5):c.335-162G>A	NKX2-5	chr5	173233370	173233371	3'UTR	G	A					123.051	94.0947	0.222339	no	0.6	0.593548	0.0222222	0.0222222
chr5_37107583_37107584_-_G_T	NM_023073.3(C5orf42):c.*18G>T	C5orf42	chr5	37107583	37107584	3'UTR	G	T					72.5951	87.1271	0.44549	no	0.451613	0.445161	0.0444444	0.0444444
chr5_53098280_53098281_-_A_G	NM_176806.3(MOCS2):c.*808A>G	ITGA2;MOCS2	chr5	53098280	53098281	3'UTR	A	G					118.921	81.3128	0.215322	no	0.516129	0.522581	0.0666667	0.0666667
chr5_53098430_53098431_-_G_C	NM_176806.3(MOCS2):c.*658G>C	ITGA2;MOCS2	chr5	53098430	53098431	3'UTR	G	C					78.9175	55.701	0.0164458	no	0.406452	0.406452	0.0888889	0.0888889
chr5_53098557_53098558_-_A_C	NM_176806.3(MOCS2):c.*531A>C	ITGA2;MOCS2	chr5	53098557	53098558	3'UTR	A	C					56.5389	140.682	0.0591951	no	0.36129	0.367742	0.0888889	0.0814815
chr5_53101386_53101390_-_GTCA_-	NM_176806.3(MOCS2):c.*266_*269delGTCA	MOCS2	chr5	53101386	53101390	3'UTR	GTCA	-					66.9788	75.2192	0.715098	no	0.436709	0.435065	0.0797101	0.0820896
chr5_53102096_53102097_-_G_A	NM_176806.3(MOCS2):c.*146G>A	MOCS2	chr5	53102096	53102097	3'UTR	G	A	21.347	75.3028	0.172833	no	64.7697	62.4205	0.893128	no	0.425806	0.419355	0.0740741	0.0740741
chr6_107154617_107154618_-_C_T	NM_020381.3(PDSS2):c.*1C>T	PDSS2	chr6	107154617	107154618	3'UTR	C	T					88.1007	49.8025	0.0556223	no	0.406452	0.4	0.0740741	0.0814815
chr6_158150452_158150452_-_-_CATG	NM_032861.3(SERAC1):c.265_265+1insCATG	SERAC1	chr6	158150452	158150452	3'UTR	-	CATG	22.8957	41.6975	0.0736811	no	61.8186	64.2686	0.861833	no	0.415584	0.417722	0.0746269	0.0724638
chr6_87589964_87589965_-_A_C	NM_020320.4(RARS2):c.-8A>C	RARS2	chr6	87589964	87589965	3'UTR	A	C	30.2979	236.938	0.273449	no					0.642384	0.649007	0.0458015	0.0458015
chr6_98899253_98899254_-_A_G	NM_012160.4(FBXL4):c.1317+14A>G	FBXL4	chr6	98899253	98899254	3'UTR	A	G					77.5393	68.5824	0.711615	no	0.4	0.406452	0.0888889	0.0888889
chr7_140734589_140734590_-_T_C	NM_004333.4(BRAF):c.*7T>C	BRAF	chr7	140734589	140734590	3'UTR	T	C					93.6748	93.67	0.999859	no	0.348387	0.354839	0.0814815	0.0814815
chr7_6009025_6009026_-_T_C	NM_000535.6(PMS2):c.-7T>C	PMS2	chr7	6009025	6009026	3'UTR	T	C	55.7043	15.9335	8.48652e-05	yes					0.62	0.626667	0.0153846	0.0153846
chr9_101421796_101421797_-_C_T	NM_000035.3(ALDOB):c.*12C>T	ALDOB	chr9	101421796	101421797	3'UTR	C	T	14.4262	114.286	0.117057	no	56.2777	74.4576	0.223661	no	0.503226	0.496774	0.0518519	0.0518519
chr9_135693478_135693479_-_C_T	(C-T)_+118_to_termination_codon	SOHLH1	chr9	135693478	135693479	3'UTR	C	T	48.6802	20.4292	0.205818	no					0.483871	0.477419	0.0592593	0.0592593
chr9_34635573_34635574_-_T_C	(T-C)_+58_to_termination_codon	SIGMAR1	chr9	34635573	34635574	3'UTR	T	C	91.9295	9.41261	6.44316e-06	yes	58.3125	83.9299	0.0924191	no	0.567742	0.574194	0.0444444	0.0444444
chr9_34635600_34635601_-_A_G	(A-G)_+31_to_termination_codon	SIGMAR1	chr9	34635600	34635601	3'UTR	A	G	54.3446	27.0719	0.137556	no	76.994	86.3897	0.658372	no	0.580645	0.587097	0.0444444	0.037037
chr9_34635605_34635606_-_C_T	(C-T)_+26_to_termination_codon	SIGMAR1	chr9	34635605	34635606	3'UTR	C	T	42.578	133.644	0.125927	no	89.4417	71.264	0.312408	no	0.580645	0.574194	0.0444444	0.0444444
chr9_35657823_35657824_-_T_TT	NR_003051.3(RMRP):n.195dupT	RMRP	chr9	35657823	35657824	3'UTR	T	TT	19.5924	30.8565	0.628284	no					0.63871	0.634615	0.037037	0.0367647
chr9_35657870_35657871_-_C_T	NR_003051.3(RMRP):n.148C>T	RMRP	chr9	35657870	35657871	3'UTR	C	T					85.1748	110.317	0.299345	no	0.619355	0.612903	0.037037	0.037037
chr9_95101699_95101700_-_C_T	NM_000136.2(FANCC):c.*7C>T	FANCC	chr9	95101699	95101700	3'UTR	C	T					89.3947	70.8647	0.194475	no	0.632258	0.625806	0.0222222	0.0222222
chrX_130165778_130165779_-_G_C	NM_004208.3(AIFM1):c.-123G>C	AIFM1	chrX	130165778	130165779	3'UTR	G	C	26.8781	107.667	0.0105194	yes	91.2257	85.0808	0.737376	no	0.632258	0.632258	0.0296296	0.0296296
chrX_154030274_154030275_-_C_G	(C-G)_+92_to_termination_codon	MECP2	chrX	154030274	154030275	3'UTR	C	G					64.4967	75.3281	0.483143	no	0.412903	0.412903	0.0740741	0.0740741
chrX_154837540_154837541_-_G_T	(G-T)_+56_to_termination_codon	F8	chrX	154837540	154837541	3'UTR	G	T	28.2581	32.701	0.892338	no	78.3895	68.3503	0.486525	no	0.593548	0.587097	0.037037	0.037037
chrX_22227497_22227500_-_AGA_-	NM_000444.5(PHEX):c.1966-9_1966-7delTCT	PHEX	chrX	22227497	22227500	3'UTR	AGA	-	628.265	88.6523	0.179708	no	82.2829	46.7306	0.0184171	no	0.496815	0.5	0.0364964	0.0373134
chrX_22227505_22227506_-_C_G	NM_000444.5(PHEX):c.1966-1G>C	PHEX	chrX	22227505	22227506	3'UTR	C	G	100.608	26.473	0.212503	no	85.1913	104.177	0.428144	no	0.496774	0.496774	0.037037	0.037037
chrX_22227611_22227612_-_C_T	NM_000444.5(PHEX):c.2070+1G>A	PHEX	chrX	22227611	22227612	3'UTR	C	T	37.5823	31.9436	0.666375	no	61.7861	76.6919	0.307168	no	0.509677	0.503226	0.037037	0.0444444
chrX_22227615_22227616_-_C_G	NM_000444.5(PHEX):c.2070+5G>C	PHEX	chrX	22227615	22227616	3'UTR	C	G					61.7861	93.5984	0.0972774	no	0.509677	0.509677	0.037037	0.037037
chrX_43949083_43949084_-_T_C	(T-C)_+715_to_termination_codon	NDP	chrX	43949083	43949084	3'UTR	T	C					70.1067	97.4128	0.285422	no	0.432258	0.43871	0.0814815	0.0814815
chrX_49191408_49191409_-_G_A	(G-A)_+28_to_termination_codon	SYP	chrX	49191408	49191409	3'UTR	G	A	13.4764	30.601	0.519623	no					0.574194	0.567742	0.0592593	0.0592593
chr10_44372808_44372809_-_G_A	(G-A)_+519_to_termination_codon	CXCL12	chr10	44372808	44372809	3'UTR	G	A	39.7177	26.6386	0.689829	no	146.742	85.4362	0.0501954	no	0.625806	0.619355	0.0222222	0.0222222
chr10_52766861_52766862_-_T_C	(T-C)_+1275_to_termination_codon	MBL2	chr10	52766861	52766862	3'UTR	T	C	30.3613	24.0917	0.375452	no	84.5047	74.0081	0.559146	no	0.36129	0.367742	0.103704	0.103704
chr1_109274967_109274968_-_C_A	(C-A)_+39075_to_termination_codon	SORT1	chr1	109274967	109274968	3'UTR	C	A	24.3451	22.6072	0.939491	no	49.9216	65.7949	0.27613	no	0.574194	0.567742	0.0222222	0.0222222
chr1_11790307_11790308_-_A_C	(C-A)_+372_to_termination_codon	MTHFR	chr1	11790307	11790308	3'UTR	A	C	17.6789	143.491	0.223801	no					0.580645	0.587097	0.037037	0.037037
chr11_31787521_31787522_-_G_A	(A-G)_+2412_to_termination_codon	PAX6	chr11	31787521	31787522	3'UTR	G	A	33.3896	48.0534	0.650642	no	108.275	94.5721	0.64202	no	0.548387	0.541935	0.037037	0.037037
chr1_151874040_151874041_-_G_A	(G-A)_+847_to_termination_codon	THEM4	chr1	151874040	151874041	3'UTR	G	A	11.9581	31.2557	0.00797124	yes	145.524	85.5981	0.0641881	no	0.451613	0.445161	0.0592593	0.0666667
chr1_159713300_159713301_-_C_T	(C-T)_+224_to_termination_codon	CRP	chr1	159713300	159713301	3'UTR	C	T					72.6656	69.3472	0.884301	no	0.451613	0.445161	0.0444444	0.0444444
chr11_60852183_60852184_-_A_G	(G-A)_+351_to_termination_codon	PTGDR2	chr11	60852183	60852184	3'UTR	A	G					81.7695	68.1652	0.614121	no	0.567742	0.574194	0.0444444	0.0444444
chr1_161039732_161039733_-_C_T	(C-T)_+187_to_termination_codon	USF1	chr1	161039732	161039733	3'UTR	C	T	20.3034	305.425	0.0270082	yes	71.1462	89.8172	0.344755	no	0.593548	0.587097	0.0222222	0.0222222
chr11_61801833_61801834_-_G_C	(G-C)_+577_to_termination_codon	FADS1	chr11	61801833	61801834	3'UTR	G	C	19.14	39.3194	0.160596	no					0.464516	0.464516	0.037037	0.037037
chr1_186673925_186673926_-_T_C	(T-C)_+427_to_termination_codon	PTGS2	chr1	186673925	186673926	3'UTR	T	C	42.7638	27.4193	0.580446	no	82.4748	67.8591	0.487493	no	0.329032	0.335484	0.0962963	0.0888889
chr12_102396073_102396074_-_G_C	(G-C)_+6433_to_termination_codon	IGF1	chr12	102396073	102396074	3'UTR	G	C					82.9492	65.2116	0.327949	no	0.341935	0.341935	0.103704	0.103704
chr12_25207289_25207290_-_T_G	(T-G)_+2505_to_termination_codon	KRAS	chr12	25207289	25207290	3'UTR	T	G	17.3447	64.1493	0.113032	no	73.8596	91.9247	0.38109	no	0.496774	0.503226	0.037037	0.037037
chr1_230702584_230702585_-_C_A	(C-A)_+556_to_termination_codon	AGT	chr1	230702584	230702585	3'UTR	C	A					71.7275	79.6866	0.593286	no	0.432258	0.425806	0.0666667	0.0666667
chr12_52286152_52286153_-_G_C	(G-C)_+102_to_termination_codon	KRT81	chr12	52286152	52286153	3'UTR	G	C	51.8794	101.622	0.461795	no	82.0988	98.8149	0.393469	no	0.574194	0.574194	0.0222222	0.0222222
chr12_63146695_63146696_-_G_T	(G-T)_+663_to_termination_codon	AVPR1A	chr12	63146695	63146696	3'UTR	G	T	36.6581	36.148	0.989836	no	107.44	68.4539	0.122611	no	0.445161	0.43871	0.0518519	0.0592593
chr12_91103707_91103708_-_T_C	(C-T)_+457_to_termination_codon	LUM	chr12	91103707	91103708	3'UTR	T	C					85.4252	85.8474	0.98555	no	0.367742	0.374194	0.111111	0.111111
chr12_912348_912349_-_A_C	(A-C)_+1042_to_termination_codon	RAD52	chr12	912348	912349	3'UTR	A	C	27.2617	40.0995	0.569152	no	74.2197	83.1816	0.643801	no	0.432258	0.43871	0.0740741	0.0666667
chr13_46053344_46053345_-_G_C	(C-G)_+269_to_termination_codon	CPB2	chr13	46053344	46053345	3'UTR	G	C	39.8223	8.18061	0.000864866	yes	74.964	64.7535	0.498015	no	0.432258	0.432258	0.0592593	0.0592593
chr1_39896393_39896394_-_G_T	(G-T)_+978_to_termination_codon	MYCL	chr1	39896393	39896394	3'UTR	G	T	49.6291	156.31	0.309434	no	78.8705	72.4576	0.702231	no	0.516129	0.509677	0.0296296	0.0296296
chr14_35401886_35401887_-_G_A	(A-G)_+126_to_termination_codon	NFKBIA	chr14	35401886	35401887	3'UTR	G	A	14.027	14.1238	0.988598	no	68.0207	88.0009	0.221234	no	0.425806	0.419355	0.0592593	0.0666667
chr14_54843773_54843774_-_C_T	(C-T)_+243_to_termination_codon	GCH1	chr14	54843773	54843774	3'UTR	C	T					90.0128	47.5861	0.00602568	no	0.464516	0.458065	0.0740741	0.0740741
chr14_94377117_94377118_-_G_A	(G-A)_+1331_to_termination_codon	SERPINA1	chr14	94377117	94377118	3'UTR	G	A					64.431	83.2401	0.284485	no	0.393548	0.387097	0.0814815	0.0814815
chr14_95087804_95087805_-_A_G	(A-G)_+2693_to_termination_codon	DICER1	chr14	95087804	95087805	3'UTR	A	G	61.6781	110.941	0.240001	no	74.6518	70.7162	0.807169	no	0.496774	0.503226	0.0518519	0.0518519
chr1_55067068_55067069_-_C_G	(C-G)_+1976_to_termination_codon	USP24	chr1	55067068	55067069	3'UTR	C	G					76.042	79.9659	0.882946	no	0.490323	0.490323	0.0814815	0.0814815
chr17_30197785_30197786_-_T_G	(T-G)_+670_to_termination_codon	SLC6A4	chr17	30197785	30197786	3'UTR	T	G	19.4441	14.6647	0.603763	no	84.2747	110.807	0.276075	no	0.374194	0.380645	0.103704	0.103704
chr17_37687272_37687273_-_C_A	(C-A)_+99_to_termination_codon	HNF1B	chr17	37687272	37687273	3'UTR	C	A					91.0892	78.0263	0.58676	no	0.574194	0.567742	0.0222222	0.0222222
chr17_49404180_49404181_-_C_T	(C-T)_+811_to_termination_codon	PHB	chr17	49404180	49404181	3'UTR	C	T					122.574	75.7136	0.0163364	no	0.56129	0.554839	0.0222222	0.0222222
chr18_23297599_23297600_-_A_G	(A-G)_+407_to_termination_codon	TMEM241	chr18	23297599	23297600	3'UTR	A	G	817.531	63.0179	0.186183	no	78.8388	76.4501	0.876816	no	0.445161	0.451613	0.0444444	0.0444444
chr18_63126260_63126261_-_G_A	(G-A)_+2364_to_termination_codon	BCL2	chr18	63126260	63126261	3'UTR	G	A	71.081	10.6025	7.89982e-05	yes					0.580645	0.574194	0.0296296	0.0296296
chr18_69863202_69863203_-_C_T	(T-C)_+1111_to_termination_codon	CD226	chr18	69863202	69863203	3'UTR	C	T	10.9203	13.6345	0.622761	no					0.451613	0.445161	0.0814815	0.0814815
chr19_3595523_3595524_-_C_T	(C-T)_+164_to_termination_codon	TBXA2R	chr19	3595523	3595524	3'UTR	C	T					89.9619	72.292	0.325997	no	0.574194	0.567742	0.0222222	0.0222222
chr19_4502188_4502189_-_A_G	(G-A)_+2270_to_termination_codon	PLIN4	chr19	4502188	4502189	3'UTR	A	G					77.6579	92.9532	0.599272	no	0.503226	0.509677	0.0518519	0.0518519
chr19_51964568_51964569_-_C_T	(C-T)_+285_to_termination_codon	ZNF350	chr19	51964568	51964569	3'UTR	C	T	27.9404	20.4265	0.588988	no					0.445161	0.43871	0.0592593	0.0592593
chr19_7116951_7116952_-_A_G	(G-A)_+104_to_termination_codon	INSR	chr19	7116951	7116952	3'UTR	A	G	30.0684	23.3072	0.589329	no	110.676	63.4489	0.0220717	no	0.470968	0.477419	0.0444444	0.0444444
chr20_1979292_1979293_-_C_T	(C-T)_+1030_to_termination_codon	PDYN	chr20	1979292	1979293	3'UTR	C	T	11.0363	27.4126	0.2156	no					0.529032	0.522581	0.037037	0.037037
chr20_33675817_33675818_-_C_G	(C-G)_+914_to_termination_codon	E2F1	chr20	33675817	33675818	3'UTR	C	G					77.5879	85.8051	0.728137	no	0.651613	0.651613	0.0148148	0.0148148
chr20_63346203_63346204_-_C_T	(T-C)_+534_to_termination_codon	CHRNA4	chr20	63346203	63346204	3'UTR	C	T					86.3147	68.7528	0.270066	no	0.580645	0.574194	0.0222222	0.0222222
chr21_44227537_44227538_-_A_G	(G-A)_+1496_to_termination_codon	ICOSLG	chr21	44227537	44227538	3'UTR	A	G	20.7506	44.7601	0.0272815	yes	74.0991	118.266	0.0339865	no	0.445161	0.451613	0.0592593	0.0592593
chr21_44886222_44886223_-_C_A	(C-A)_+145_to_termination_codon	ITGB2	chr21	44886222	44886223	3'UTR	C	A					88.9253	57.8287	0.0219707	no	0.567742	0.56129	0.0296296	0.0296296
chr21_46599325_46599326_-_C_T	(C-T)_+37_to_termination_codon	S100B	chr21	46599325	46599326	3'UTR	C	T	35.8515	39.0273	0.798413	no	66.6008	78.06	0.468062	no	0.503226	0.496774	0.0666667	0.0666667
chr3_158097998_158097999_-_T_C	(T-C)_+28_to_termination_codon	SHOX2	chr3	158097998	158097999	3'UTR	T	C	83.0693	66.2503	0.880606	no	106.565	101.643	0.859486	no	0.670968	0.677419	0.0222222	0.0222222
chr4_148079933_148079934_-_A_G	(G-A)_+1410_to_termination_codon	NR3C2	chr4	148079933	148079934	3'UTR	A	G	26.2805	20.5066	0.716417	no					0.470968	0.477419	0.0296296	0.0222222
chr4_156762532_156762533_-_G_A	(G-A)_+557_to_termination_codon	PDGFC	chr4	156762532	156762533	3'UTR	G	A	14.6606	33.139	0.240765	no	67.8194	98.069	0.312893	no	0.374194	0.367742	0.0962963	0.0962963
chr4_163324252_163324253_-_A_G	(A-G)_+1050_to_termination_codon	NPY1R	chr4	163324252	163324253	3'UTR	A	G					93.4641	127.252	0.44953	no	0.393548	0.4	0.111111	0.111111
chr4_175633070_175633071_-_T_C	(T-C)_+1834_to_termination_codon	GPM6A	chr4	175633070	175633071	3'UTR	T	C	19.6031	23.0543	0.716448	no	66.6696	86.8799	0.201426	no	0.4	0.406452	0.0814815	0.0814815
chr4_184627796_184627797_-_T_C	(T-C)_+1475_to_termination_codon	CASP3	chr4	184627796	184627797	3'UTR	T	C	21.7643	25.7737	0.502672	no	84.3208	85.4972	0.949347	no	0.348387	0.354839	0.0962963	0.0888889
chr4_55434517_55434518_-_G_A	(G-A)_+897_to_termination_codon	CLOCK	chr4	55434517	55434518	3'UTR	G	A	23.2292	12.9309	0.0574339	no	78.2124	75.5198	0.873435	no	0.367742	0.36129	0.0740741	0.0814815
chr4_87305078_87305079_-_A_G	(A-G)_+139_to_termination_codon	HSD17B13	chr4	87305078	87305079	3'UTR	A	G	15.4539	16.5745	0.843452	no	70.2186	80.3964	0.545084	no	0.380645	0.387097	0.0888889	0.0888889
chr5_140333292_140333293_-_C_T	(C-T)_+1383_to_termination_codon	HBEGF	chr5	140333292	140333293	3'UTR	C	T	39.5548	73.1169	0.56889	no	66.9692	84.7303	0.294479	no	0.548387	0.541935	0.037037	0.037037
chr5_151662988_151662989_-_G_C	(C-G)_+582_to_termination_codon	SPARC	chr5	151662988	151662989	3'UTR	G	C					51.4132	57.1252	0.622173	no	0.464516	0.464516	0.0592593	0.0592593
chr5_31401339_31401340_-_T_C	(T-C)_+92_to_termination_codon	DROSHA	chr5	31401339	31401340	3'UTR	T	C	37.8873	24.0822	0.626962	no	70.9986	70.3065	0.974068	no	0.406452	0.412903	0.0740741	0.0740741
chr6_111299554_111299555_-_C_T	(T-C)_+461_to_termination_codon	REV3L	chr6	111299554	111299555	3'UTR	C	T					93.5618	83.2927	0.569754	no	0.309677	0.303226	0.0962963	0.103704
chr6_77461406_77461407_-_G_A	(G-A)_+824_to_termination_codon	HTR1B	chr6	77461406	77461407	3'UTR	G	A					68.9316	70.7074	0.904983	no	0.425806	0.419355	0.0740741	0.0740741
chr6_87085540_87085541_-_T_A	(A-T)_+215_to_termination_codon	CGA	chr6	87085540	87085541	3'UTR	T	A					74.5689	87.3301	0.435205	no	0.406452	0.406452	0.0814815	0.0814815
chr7_95298182_95298183_-_C_T	(C-T)_+761_to_termination_codon	PON1	chr7	95298182	95298183	3'UTR	C	T					68.2246	51.118	0.248973	no	0.425806	0.419355	0.0518519	0.0518519
chr8_101688066_101688067_-_A_G	(A-G)_+1242_to_termination_codon	NCALD	chr8	101688066	101688067	3'UTR	A	G					69.2121	62.6913	0.729281	no	0.464516	0.470968	0.0592593	0.0518519
chr8_107250440_107250441_-_A_T	(A-T)_+1414_to_termination_codon	ANGPT1	chr8	107250440	107250441	3'UTR	A	T					70.5159	82.3486	0.385342	no	0.335484	0.335484	0.118519	0.125926
chr8_16992889_16992890_-_C_T	(C-T)_+182_to_termination_codon	FGF20	chr8	16992889	16992890	3'UTR	C	T					82.5665	67.2354	0.344453	no	0.354839	0.348387	0.0888889	0.0962963
chr8_89935040_89935041_-_G_C	(G-C)_+541_to_termination_codon	NBN	chr8	89935040	89935041	3'UTR	G	C	12.991	14.2286	0.815406	no	93.3061	95.2819	0.919935	no	0.374194	0.374194	0.0962963	0.0962963
chr9_22003223_22003224_-_G_A	(G-A)_+2763_to_termination_codon	CDKN2B	chr9	22003223	22003224	3'UTR	G	A					75.3459	73.7558	0.932013	no	0.380645	0.374194	0.0962963	0.103704
chrX_129647886_129647887_-_G_T	(T-G)_+739_to_termination_codon	APLN	chrX	129647886	129647887	3'UTR	G	T					69.3479	86.9956	0.311647	no	0.593548	0.587097	0.037037	0.037037
chr10_103089358_103089359_-_C_G	(C-G)_+313_to_termination_codon	NT5C2	chr10	103089358	103089359	3'UTR	C	G					79.0668	68.2153	0.537128	no	0.470968	0.470968	0.0592593	0.0592593
chr10_44378101_44378102_-_G_A	NM_000609.6(CXCL12):c.266+535G>A	CXCL12	chr10	44378101	44378102	3'UTR	G	A					61.136	95.9062	0.049554	no	0.612903	0.606452	0.0222222	0.0222222
chr11_119339268_119339269_-_A_T	(T-A)_+62_to_termination_codon	C1QTNF5	chr11	119339268	119339269	3'UTR	A	T	85.622	135.487	0.731823	no	64.7773	79.7469	0.338983	no	0.56129	0.56129	0.037037	0.037037
chr11_123725994_123725995_-_T_G	(T-G)_+2_to_termination_codon	ZNF202	chr11	123725994	123725995	3'UTR	T	G					77.1706	82.1977	0.816632	no	0.56129	0.567742	0.0296296	0.0222222
chr1_113812319_113812320_-_A_C	(C-A)_+2585_to_termination_codon	PTPN22	chr1	113812319	113812320	3'UTR	A	C	124.592	37.5113	0.44621	no					0.63871	0.645161	0.0222222	0.0222222
chr1_113814040_113814041_-_T_C	(C-T)_+864_to_termination_codon	PTPN22	chr1	113814040	113814041	3'UTR	T	C					55.6287	63.5033	0.505738	no	0.335484	0.341935	0.118519	0.118519
chr11_2131310_2131311_-_G_C	(C-G)_+1676_to_termination_codon	IGF2	chr11	2131310	2131311	3'UTR	G	C					57.8623	52.0326	0.769377	no	0.567742	0.567742	0.0296296	0.0296296
chr11_47239708_47239709_-_C_T	(C-T)_+407_to_termination_codon	ACP2	chr11	47239708	47239709	3'UTR	C	T	13.5927	43.6576	0.125638	no	56.4364	78.9849	0.123102	no	0.496774	0.490323	0.0592593	0.0592593
chr11_47778222_47778223_-_G_C	(G-C)_+882_to_termination_codon	NUP160	chr11	47778222	47778223	3'UTR	G	C	142.833	15.5492	0.032908	yes	79.898	78.5486	0.940691	no	0.348387	0.348387	0.103704	0.103704
chr1_156243465_156243466_-_C_T	NM_199173.5(BGLAP):c.*304G>A	BGLAP	chr1	156243465	156243466	3'UTR	C	T	36.4105	33.9641	0.879642	no	77.8641	62.0422	0.182646	no	0.464516	0.458065	0.0740741	0.0740741
chr11_60171833_60171834_-_A_C	(A-C)_+1204_to_termination_codon	MS4A6A	chr11	60171833	60171834	3'UTR	A	C					64.0906	86.0038	0.339589	no	0.419355	0.425806	0.037037	0.037037
chr11_61802357_61802358_-_G_A	(G-A)_+53_to_termination_codon	FADS1	chr11	61802357	61802358	3'UTR	G	A	27.5882	19.0376	0.57215	no					0.548387	0.541935	0.0444444	0.0444444
chr1_165401237_165401238_-_C_T	(C-T)_+25_to_termination_codon	RXRG	chr1	165401237	165401238	3'UTR	C	T					87.7581	75.7544	0.324698	no	0.632258	0.625806	0.0148148	0.0148148
chr1_169691639_169691640_-_T_C	(T-C)_+144_to_termination_codon	SELL	chr1	169691639	169691640	3'UTR	T	C	86.9627	10.2824	0.0450039	yes	101.263	61.1197	0.0675218	no	0.509677	0.516129	0.037037	0.037037
chr1_186672549_186672550_-_A_G	(A-G)_+1803_to_termination_codon	PTGS2	chr1	186672549	186672550	3'UTR	A	G					88.1201	72.3373	0.330184	no	0.309677	0.316129	0.133333	0.133333
chr12_10159689_10159690_-_C_T	(C-T)_+190_to_termination_codon	OLR1	chr12	10159689	10159690	3'UTR	C	T					83.4841	76.82	0.728981	no	0.483871	0.477419	0.0592593	0.0592593
chr12_10159691_10159692_-_T_C	(C-T)_+188_to_termination_codon	OLR1	chr12	10159691	10159692	3'UTR	T	C					77.3389	78.7941	0.943852	no	0.490323	0.496774	0.0592593	0.0518519
chr12_109555797_109555798_-_G_T	(T-G)_+1230_to_termination_codon	MMAB	chr12	109555797	109555798	3'UTR	G	T	25.6925	19.0903	0.650973	no	73.798	73.6576	0.992408	no	0.477419	0.470968	0.0592593	0.0592593
chr12_109556170_109556171_-_G_C	(C-G)_+857_to_termination_codon	MMAB	chr12	109556170	109556171	3'UTR	G	C	19.2144	28.3257	0.306372	no	70.5943	86.2755	0.46162	no	0.516129	0.516129	0.0444444	0.0444444
chr12_117215032_117215033_-_C_T	(C-T)_+276_to_termination_codon	NOS1	chr12	117215032	117215033	3'UTR	C	T	60.978	96.9973	0.491474	no	88.0568	86.2463	0.916726	no	0.548387	0.541935	0.0222222	0.0222222
chr12_121003657_121003658_-_C_A	(C-A)_+495_to_termination_codon	C12orf43	chr12	121003657	121003658	3'UTR	C	A	30.5445	112.613	0.136813	no	87.8918	83.3774	0.791044	no	0.470968	0.464516	0.037037	0.0444444
chr12_123936905_123936906_-_A_G	(G-A)_+152_to_termination_codon	CCDC92	chr12	123936905	123936906	3'UTR	A	G	56.0988	49.4263	0.841263	no	74.5197	86.0077	0.5064	no	0.483871	0.490323	0.0518519	0.0518519
chr12_25205715_25205716_-_T_A	(T-A)_+4079_to_termination_codon	KRAS	chr12	25205715	25205716	3'UTR	T	A					57.3654	50.0592	0.330501	no	0.464516	0.464516	0.0814815	0.0740741
chr12_26337221_26337222_-_G_A	(G-A)_+2175_to_termination_codon	ITPR2	chr12	26337221	26337222	3'UTR	G	A	17.7289	18.4077	0.953747	no	80.6738	76.5699	0.82382	no	0.406452	0.4	0.111111	0.118519
chr12_26338541_26338542_-_A_G	(G-A)_+855_to_termination_codon	ITPR2	chr12	26338541	26338542	3'UTR	A	G					69.9584	65.0838	0.752131	no	0.348387	0.354839	0.118519	0.118519
chr1_226360852_226360853_-_T_C	(T-C)_+607_to_termination_codon	PARP1	chr1	226360852	226360853	3'UTR	T	C	24.1281	29.23	0.784326	no	57.9992	95.3884	0.089968	no	0.393548	0.4	0.0740741	0.0666667
chr12_51095225_51095226_-_G_A	(G-A)_+15_to_termination_codon	TFCP2	chr12	51095225	51095226	3'UTR	G	A					75.6445	89.6557	0.36962	no	0.541935	0.535484	0.0222222	0.0222222
chr1_27891588_27891589_-_A_G	(G-A)_+574_to_termination_codon	RPA2	chr1	27891588	27891589	3'UTR	A	G					63.1199	97.5944	0.136127	no	0.406452	0.412903	0.0962963	0.0962963
chr1_41479018_41479019_-_G_A	(A-G)_+390_to_termination_codon	EDN2	chr1	41479018	41479019	3'UTR	G	A	25.9029	1517.78	0.0247505	yes	92.3129	75.3624	0.395097	no	0.612903	0.606452	0.0222222	0.0222222
chr15_78596057_78596058_-_C_T	(C-T)_+546_to_termination_codon	CHRNA3	chr15	78596057	78596058	3'UTR	C	T					87.2593	60.2226	0.309323	no	0.387097	0.380645	0.118519	0.125926
chr16_31090999_31091000_-_G_A	(G-A)_+134_to_termination_codon	VKORC1	chr16	31090999	31091000	3'UTR	G	A					70.3638	103.25	0.237809	no	0.548387	0.541935	0.0592593	0.0592593
chr16_3963465_3963466_-_G_A	(G-A)_+2309_to_termination_codon	ADCY9	chr16	3963465	3963466	3'UTR	G	A					83.8027	86.5329	0.925467	no	0.574194	0.567742	0.037037	0.037037
chr16_67943478_67943479_-_A_G	(A-G)_+1361_to_termination_codon	SLC12A4	chr16	67943478	67943479	3'UTR	A	G					76.7037	78.6838	0.912803	no	0.6	0.606452	0.0444444	0.0444444
chr17_48592067_48592068_-_G_A	(A-G)_+141_to_termination_codon	HOXB5	chr17	48592067	48592068	3'UTR	G	A	24.1282	8.39557	0.00444864	yes	88.552	70.7025	0.28146	no	0.522581	0.516129	0.0592593	0.0592593
chr18_2920289_2920290_-_C_T	(T-C)_+3_to_termination_codon	LPIN2	chr18	2920289	2920290	3'UTR	C	T	21.0033	29.3545	0.561747	no	82.6464	97.1761	0.382723	no	0.63871	0.632258	0.0222222	0.0222222
chr1_93150644_93150645_-_A_G	(G-A)_+4025_to_termination_codon	TMED5	chr1	93150644	93150645	3'UTR	A	G	12.7114	16.9415	0.591397	no	77.4649	92.3917	0.466722	no	0.380645	0.387097	0.0740741	0.0740741
chr19_41323700_41323701_-_C_T	(C-T)_+7351_to_termination_codon	TGFB1	chr19	41323700	41323701	3'UTR	C	T	39.9906	69.5406	0.516334	no	81.1418	95.0887	0.542315	no	0.567742	0.56129	0.0296296	0.0296296
chr19_41324700_41324701_-_A_G	(A-G)_+6351_to_termination_codon	TGFB1	chr19	41324700	41324701	3'UTR	A	G	49.0496	17.5211	0.0398386	yes	95.1834	62.5207	0.0909062	no	0.522581	0.529032	0.0518519	0.0518519
chr19_7112869_7112870_-_T_C	(C-T)_+4186_to_termination_codon	INSR	chr19	7112869	7112870	3'UTR	T	C	15.4737	34.4308	0.254866	no	93.0154	77.2316	0.343661	no	0.419355	0.425806	0.0592593	0.0592593
chr19_8521201_8521202_-_G_T	(G-T)_+326_to_termination_codon	MYO1F	chr19	8521201	8521202	3'UTR	G	T	42.3321	13.7867	0.0441904	yes	95.9354	84.929	0.600669	no	0.535484	0.529032	0.0296296	0.0296296
chr20_1629415_1629416_-_T_G	(G-T)_+808_to_termination_codon	SIRPG	chr20	1629415	1629416	3'UTR	T	G					58.8593	63.9773	0.760558	no	0.56129	0.567742	0.0296296	0.0296296
chr22_45344214_45344215_-_G_A	(A-G)_+341_to_termination_codon	SMC1B	chr22	45344214	45344215	3'UTR	G	A					112.86	76.5581	0.22467	no	0.406452	0.4	0.0666667	0.0740741
chr2_49921833_49921834_-_G_A	(G-A)_+110_to_termination_codon	NRXN1	chr2	49921833	49921834	3'UTR	G	A					87.1625	78.2717	0.681654	no	0.354839	0.348387	0.0888889	0.0888889
chr3_124763265_124763266_-_A_C	(A-C)_+357_to_termination_codon	ITGB5	chr3	124763265	124763266	3'UTR	A	C	276.786	24.3083	0.12252	no	74.8201	57.9982	0.293089	no	0.541935	0.548387	0.0296296	0.0296296
chr3_128480536_128480537_-_C_T	(C-T)_+482_to_termination_codon	GATA2	chr3	128480536	128480537	3'UTR	C	T	21.7355	672.703	0.195689	no					0.593548	0.587097	0.0222222	0.0222222
chr3_128480835_128480836_-_C_T	(C-T)_+183_to_termination_codon	GATA2	chr3	128480835	128480836	3'UTR	C	T	40.4734	11.8565	0.00661219	yes					0.612903	0.606452	0.0222222	0.0222222
chr3_165773192_165773193_-_G_A	(A-G)_+189_to_termination_codon	BCHE	chr3	165773192	165773193	3'UTR	G	A					60.2953	60.3687	0.996365	no	0.348387	0.341935	0.125926	0.125926
chr3_184372453_184372454_-_G_A	(G-A)_+59_to_termination_codon	THPO	chr3	184372453	184372454	3'UTR	G	A					65.8261	62.8782	0.858976	no	0.548387	0.541935	0.0296296	0.0296296
chr3_184372477_184372478_-_G_A	(G-A)_+35_to_termination_codon	THPO	chr3	184372477	184372478	3'UTR	G	A	76.7975	43.8051	0.767684	no	98.6871	80.0707	0.363575	no	0.541935	0.535484	0.037037	0.037037
chr3_52840271_52840272_-_A_G	(A-G)_+222_to_termination_codon	TMEM110	chr3	52840271	52840272	3'UTR	A	G					94.1495	78.1392	0.410241	no	0.554839	0.56129	0.0296296	0.0296296
chr4_119318722_119318723_-_C_T	(C-T)_+318_to_termination_codon	FABP2	chr4	119318722	119318723	3'UTR	C	T	42.255	20.546	0.102128	no	62.5125	68.1217	0.684332	no	0.425806	0.419355	0.0814815	0.0814815
chr4_174491325_174491326_-_G_A	(G-A)_+630_to_termination_codon	HPGD	chr4	174491325	174491326	3'UTR	G	A					92.6639	68.1826	0.115612	no	0.43871	0.432258	0.0518519	0.0518519
chr4_184756955_184756956_-_T_C	(C-T)_+169_to_termination_codon	ACSL1	chr4	184756955	184756956	3'UTR	T	C	43.0052	14.7091	0.0443277	yes					0.451613	0.458065	0.0592593	0.0592593
chr4_55435201_55435202_-_T_C	(T-C)_+213_to_termination_codon	CLOCK	chr4	55435201	55435202	3'UTR	T	C					74.9995	39.0784	0.00919411	no	0.451613	0.458065	0.0962963	0.0888889
chr4_68929507_68929508_-_A_T	(A-T)_+305_to_termination_codon	UGT2A3	chr4	68929507	68929508	3'UTR	A	T					67.6525	41.9865	0.0258587	no	0.406452	0.406452	0.0962963	0.0962963
chr5_157086332_157086333_-_C_T	(T-C)_+769_to_termination_codon	HAVCR2	chr5	157086332	157086333	3'UTR	C	T	29.6815	20.5547	0.50085	no	69.8106	69.2682	0.977567	no	0.470968	0.464516	0.0518519	0.0592593
chr5_159315941_159315942_-_A_C	(A-C)_+743_to_termination_codon	IL12B	chr5	159315941	159315942	3'UTR	A	C	32.5819	16.2848	0.116663	no	86.8398	100.977	0.502011	no	0.36129	0.367742	0.103704	0.0962963
chr5_180300956_180300957_-_G_A	(G-A)_+607_to_termination_codon	GFPT2	chr5	180300956	180300957	3'UTR	G	A	133.999	126.396	0.925904	no	78.6703	81.1084	0.888298	no	0.529032	0.522581	0.037037	0.037037
chr5_56922201_56922202_-_G_A	(G-A)_+926_to_termination_codon	MIER3	chr5	56922201	56922202	3'UTR	G	A	25.7747	26.5073	0.8935	no	69.258	86.2561	0.313901	no	0.458065	0.451613	0.0666667	0.0740741
chr6_159778654_159778655_-_A_G	(A-G)_+390_to_termination_codon	TCP1	chr6	159778654	159778655	3'UTR	A	G					56.0181	55.0227	0.925085	no	0.464516	0.470968	0.0740741	0.0740741
chr6_169217630_169217631_-_T_G	(T-G)_+191_to_termination_codon	THBS2	chr6	169217630	169217631	3'UTR	T	G					65.1744	69.298	0.773555	no	0.464516	0.470968	0.0666667	0.0666667
chr6_31353903_31353904_-_G_A	NM_005514.7:c.*397G>A	HLA-B	chr6	31353903	31353904	3'UTR	G	A					59.675	57.4002	0.85066	no	0.374194	0.367742	0.0740741	0.0740741
chr6_31354078_31354079_-_T_A	NM_005514.7:c.*222T>A	HLA-B	chr6	31354078	31354079	3'UTR	T	A	27.8787	50.2678	0.171412	no	88.9168	86.4457	0.903409	no	0.535484	0.535484	0.0222222	0.0222222
chr6_31354078_31354079_-_T_C	NM_005514.7:c.*222T>C	HLA-B	chr6	31354078	31354079	3'UTR	T	C	27.8787	73.1954	0.179771	no	88.9168	86.9196	0.91915	no	0.535484	0.541935	0.0222222	0.0222222
chr6_31354078_31354079_-_T_G	NM_005514.7:c.*222T>G	HLA-B	chr6	31354078	31354079	3'UTR	T	G	27.8787	61.213	0.021649	yes	88.9168	80.5425	0.647241	no	0.535484	0.541935	0.0222222	0.0222222
chr6_31354137_31354138_-_T_C	NM_005514.7:c.*163T>C	HLA-B	chr6	31354137	31354138	3'UTR	T	C	30.7158	17.8812	0.444775	no					0.541935	0.548387	0.0296296	0.0296296
chr6_31354138_31354139_-_T_C	NM_005514.7:c.*162T>C	HLA-B	chr6	31354138	31354139	3'UTR	T	C					77.0645	107.609	0.181576	no	0.541935	0.548387	0.0296296	0.0296296
chr6_31354138_31354139_-_T_G	NM_005514.7:c.*162T>G	HLA-B	chr6	31354138	31354139	3'UTR	T	G	297.874	37.9539	0.208452	no	77.0645	77.0417	0.998954	no	0.541935	0.548387	0.0296296	0.0296296
chr6_32659716_32659717_-_A_G	NM_002123.4:c.*519A>G	HLA-DQB1	chr6	32659716	32659717	3'UTR	A	G					109.078	71.5981	0.219114	no	0.451613	0.458065	0.0518519	0.0518519
chr6_32659999_32660000_-_C_G	NM_002123.4:c.*236C>G	HLA-DQB1	chr6	32659999	32660000	3'UTR	C	G	45.8314	34.5336	0.702945	no	62.7472	83.1376	0.180675	no	0.541935	0.541935	0.0296296	0.0296296
chr6_32660068_32660068_-_-_A	NM_002123.4:c.*167_*168insT	HLA-DQB1	chr6	32660068	32660068	3'UTR	-	A	49.1271	64.4728	0.575911	no	91.8791	77.2284	0.389723	no	0.603896	0.6	0.0223881	0.0222222
chr6_32660068_32660068_-_-_C	NM_002123.4:c.*167_*168insG	HLA-DQB1	chr6	32660068	32660068	3'UTR	-	C	49.1271	169.114	0.0550194	yes	91.8791	92.9451	0.95373	no	0.603896	0.606452	0.0223881	0.0222222
chr6_34589468_34589469_-_G_A	(G-A)_+1096_to_termination_codon	C6orf106	chr6	34589468	34589469	3'UTR	G	A	26.0547	61.0845	0.350167	no	61.334	91.266	0.0468592	no	0.490323	0.483871	0.0518519	0.0518519
chr6_88141461_88141462_-_A_G	(A-G)_+2394_to_termination_codon	CNR1	chr6	88141461	88141462	3'UTR	A	G					93.6598	72.5552	0.137898	no	0.393548	0.4	0.0740741	0.0740741
chr6_88142031_88142032_-_C_T	(C-T)_+1824_to_termination_codon	CNR1	chr6	88142031	88142032	3'UTR	C	T					77.3231	65.8703	0.392042	no	0.477419	0.470968	0.0592593	0.0592593
chr7_73593612_73593613_-_C_T	(C-T)_+252_to_termination_codon	MLXIPL	chr7	73593612	73593613	3'UTR	C	T					40.6245	88.4047	0.000392766	yes	0.56129	0.554839	0.0148148	0.0148148
chr7_75769679_75769680_-_T_G	(T-G)_+13_to_termination_codon	CCL26	chr7	75769679	75769680	3'UTR	T	G	185.165	46.5467	0.213108	no	77.5685	98.6449	0.291658	no	0.587097	0.593548	0.0222222	0.0222222
chr8_142611419_142611420_-_G_A	(G-A)_+1661_to_termination_codon	ARC	chr8	142611419	142611420	3'UTR	G	A					50.0197	89.7722	0.000594096	no	0.619355	0.612903	0.0296296	0.0296296
chr8_58583930_58583931_-_T_C	(T-C)_+175_to_termination_codon	NSMAF	chr8	58583930	58583931	3'UTR	T	C	20.9043	23.0006	0.855537	no	89.8033	80.9935	0.580282	no	0.4	0.406452	0.0814815	0.0740741
chr8_6870675_6870676_-_G_A	(G-A)_+5_to_termination_codon	DEFB1	chr8	6870675	6870676	3'UTR	G	A					62.7447	91.7657	0.154747	no	0.410959	0.40411	0.0634921	0.0634921
chr8_89933369_89933370_-_G_A	(G-A)_+2212_to_termination_codon	NBN	chr8	89933369	89933370	3'UTR	G	A	23.1266	29.593	0.511167	no	79.0558	73.7245	0.728235	no	0.425806	0.419355	0.0888889	0.0888889
chr9_129813780_129813781_-_G_T	(G-T)_+191_to_termination_codon	TOR1A	chr9	129813780	129813781	3'UTR	G	T	21.7651	57.3482	0.539716	no	97.7711	75.7085	0.219016	no	0.625806	0.619355	0.0148148	0.0148148
chrX_154835924_154835925_-_G_A	(A-G)_+1672_to_termination_codon	F8	chrX	154835924	154835925	3'UTR	G	A					79.7025	128.909	0.0808307	no	0.380645	0.374194	0.103704	0.111111
chr1_11845726_11845727_-_A_C	(A-C)_+282_to_termination_codon	NPPA	chr1	11845726	11845727	3'UTR	A	C	26.7337	32.4823	0.828373	no	79.2925	74.8675	0.768872	no	0.458065	0.464516	0.0518519	0.0518519
chr1_202940845_202940846_-_C_G	(C-G)_+727_to_termination_codon	ADIPOR1	chr1	202940845	202940846	3'UTR	C	G					78.2391	81.0609	0.90071	no	0.354839	0.354839	0.103704	0.103704
chr12_25209282_25209283_-_T_C	(T-C)_+512_to_termination_codon	KRAS	chr12	25209282	25209283	3'UTR	T	C					76.8347	60.254	0.406156	no	0.43871	0.445161	0.0666667	0.0666667
chr12_25209596_25209597_-_T_G	(G-T)_+198_to_termination_codon	KRAS	chr12	25209596	25209597	3'UTR	T	G					85.6704	75.4719	0.76472	no	0.387097	0.393548	0.0666667	0.0666667
chr12_25209617_25209618_-_T_G	(T-G)_+177_to_termination_codon	KRAS	chr12	25209617	25209618	3'UTR	T	G	17.6078	24.647	0.162411	no	86.0754	68.0462	0.241749	no	0.387097	0.393548	0.0740741	0.0666667
chr13_106491979_106491980_-_A_C	(A-C)_+1060_to_termination_codon	EFNB2	chr13	106491979	106491980	3'UTR	A	C	42.0725	50.2324	0.740069	no	71.2942	75.2561	0.749872	no	0.490323	0.496774	0.0740741	0.0740741
chr13_46053303_46053304_-_T_A	(A-T)_+310_to_termination_codon	CPB2	chr13	46053303	46053304	3'UTR	T	A	86.4767	53.8309	0.598406	no	85.1847	69.4329	0.278743	no	0.458065	0.458065	0.0444444	0.0444444
chr13_46053541_46053542_-_A_G	(G-A)_+72_to_termination_codon	CPB2	chr13	46053541	46053542	3'UTR	A	G					74.7122	88.7757	0.371934	no	0.354839	0.36129	0.0888889	0.0888889
chr15_51210788_51210789_-_C_T	(C-T)_+19_to_termination_codon	CYP19A1	chr15	51210788	51210789	3'UTR	C	T	23.263	58.4183	0.316742	no	100.514	87.2378	0.596124	no	0.490323	0.483871	0.0444444	0.0518519
chr16_28605735_28605736_-_C_T	(C-T)_+85_to_termination_codon	SULT1A1	chr16	28605735	28605736	3'UTR	C	T	206.486	17.8904	0.00659844	yes	81.0181	90.5055	0.686654	no	0.516129	0.509677	0.0444444	0.0444444
chr17_30197992_30197993_-_T_G	(T-G)_+463_to_termination_codon	SLC6A4	chr17	30197992	30197993	3'UTR	T	G	14.4705	27.9363	0.000464032	no	81.8472	81.6944	0.993207	no	0.445161	0.451613	0.111111	0.103704
chr17_43044391_43044392_-_C_T	(C-T)_+1286_to_termination_codon	BRCA1	chr17	43044391	43044392	3'UTR	C	T	16.6132	40.9056	0.0106691	yes	81.9978	65.5245	0.23855	no	0.477419	0.470968	0.0740741	0.0740741
chr17_43044854_43044855_-_C_T	(C-T)_+823_to_termination_codon	BRCA1	chr17	43044854	43044855	3'UTR	C	T	21.9187	10.4197	0.307807	no					0.490323	0.483871	0.0222222	0.0222222
chr17_43045298_43045299_-_G_A	(G-A)_+379_to_termination_codon	BRCA1	chr17	43045298	43045299	3'UTR	G	A					47.7078	44.0021	0.742905	no	0.509677	0.503226	0.0518519	0.0592593
chr17_43045368_43045369_-_T_C	(T-C)_+309_to_termination_codon	BRCA1	chr17	43045368	43045369	3'UTR	T	C	12.323	17.207	0.433615	no	62.6072	80.27	0.390314	no	0.470968	0.477419	0.0592593	0.0592593
chr17_43045413_43045414_-_C_T	(C-T)_+264_to_termination_codon	BRCA1	chr17	43045413	43045414	3'UTR	C	T					81.0548	72.4911	0.743708	no	0.387097	0.380645	0.0740741	0.0740741
chr1_86862841_86862842_-_G_A	(G-A)_+632_to_termination_codon	SELENOF	chr1	86862841	86862842	3'UTR	G	A	18.7566	43.4519	0.0708582	no	66.5774	88.5277	0.123775	no	0.393548	0.387097	0.0666667	0.0666667
chr19_40843591_40843592_-_C_A	(C-A)_+204_to_termination_codon	CYP2A6	chr19	40843591	40843592	3'UTR	C	A	21.5131	33.6914	0.434726	no	47.0467	77.1241	0.00971944	no	0.470968	0.464516	0.0814815	0.0814815
chr19_40843594_40843595_-_A_G	(A-G)_+201_to_termination_codon	CYP2A6	chr19	40843594	40843595	3'UTR	A	G	21.5131	88.6629	0.340866	no	47.0467	81.0329	0.00483796	no	0.470968	0.477419	0.0814815	0.0814815
chr20_35433483_35433484_-_T_C	(T-C)_+425_to_termination_codon	GDF5	chr20	35433483	35433484	3'UTR	T	C	67.3576	36.6754	0.527872	no	87.3219	84.0849	0.860727	no	0.554839	0.56129	0.0148148	0.0148148
chr2_165989450_165989451_-_C_T	(C-T)_+1794_to_termination_codon	SCN1A	chr2	165989450	165989451	3'UTR	C	T	27.169	36.8554	0.185141	no	76.5168	93.3831	0.34797	no	0.374194	0.367742	0.0814815	0.0814815
chr4_68646935_68646936_-_C_T	(C-T)_+168_to_termination_codon	UGT2B15	chr4	68646935	68646936	3'UTR	C	T					73.7269	80.7842	0.655528	no	0.367742	0.36129	0.103704	0.103704
chr4_89726126_89726127_-_C_T	(C-T)_+501_to_termination_codon	SNCA	chr4	89726126	89726127	3'UTR	C	T					71.71	97.9628	0.253275	no	0.335484	0.329032	0.118519	0.118519
chr5_80628863_80628864_-_C_T	(C-T)_+223_to_termination_codon	DHFR	chr5	80628863	80628864	3'UTR	C	T	9.74073	48.2575	2.30229e-06	yes	79.0341	59.7359	0.148711	no	0.522581	0.516129	0.0444444	0.0518519
chr6_10397882_10397883_-_A_C	(A-C)_+534_to_termination_codon	TFAP2A	chr6	10397882	10397883	3'UTR	A	C					36.6956	61.2136	0.0252236	no	0.36129	0.367742	0.0740741	0.0666667
chr6_31268861_31268862_-_C_T	(C-T)_+307_to_termination_codon	HLA-C	chr6	31268861	31268862	3'UTR	C	T					58.0216	56.3656	0.910224	no	0.387097	0.380645	0.0814815	0.0814815
chr6_33005503_33005504_-_A_G	(A-G)_+1334_to_termination_codon	HLA-DOA	chr6	33005503	33005504	3'UTR	A	G	15.9231	23.6903	0.396744	no	70.6333	91.2212	0.177895	no	0.554839	0.56129	0.0296296	0.0296296
chr7_99757164_99757165_-_G_A	(G-A)_+968_to_termination_codon	CYP3A4	chr7	99757164	99757165	3'UTR	G	A					81.7293	91.2816	0.695202	no	0.380645	0.374194	0.0888889	0.0888889
chr11_101452868_101452869_-_C_T	NM_004621.5(TRPC6):c.*86C>T	TRPC6	chr11	101452868	101452869	3'UTR	C	T					74.3824	72.8337	0.919044	no	0.419355	0.412903	0.0814815	0.0814815
chr17_19716684_19716685_-_C_T	NM_152908.3(SLC47A2):c.-130C>T	SLC47A2	chr17	19716684	19716685	3'UTR	C	T					92.4503	93.4213	0.96527	no	0.632258	0.625806	0.0444444	0.0444444
chr17_7668457_7668472_-_TATATCCCATTTTTA_GCTATCCCATTTTGC	N/A	TP53	chr17	7668457	7668472	3'UTR	TATATCCCATTTTTA	GCTATCCCATTTTGC	16.9259	69.5807	0.0065671	yes	60.9384	62.3336	0.9253	no	0.449704	0.473373	0.0671141	0.0536913
chr18_673443_673449_-_CTTTAA_-	NM_001071.2(TYMS):c.*447_*452delTTAAAG	TYMS	chr18	673443	673449	3'UTR	CTTTAA	-					73.8605	80.5054	0.701249	no	0.40625	0.415584	0.0928571	0.0895522
chr19_45409477_45409478_-_G_T	NM_001983.3(ERCC1):c.*197G>T	ERCC1	chr19	45409477	45409478	3'UTR	G	T	58.5317	15.5202	0.065261	yes	89.793	72.3927	0.398073	no	0.580645	0.574194	0.0296296	0.0296296
chr22_24429542_24429543_-_G_T	NM_000675.5(ADORA2A):c.-275+1797C>A	ADORA2A	chr22	24429542	24429543	3'UTR	G	T					51.2019	73.1388	0.267968	no	0.625806	0.619355	0.0222222	0.0222222
chr10_102830571_102830572_-_C_T	NM_000102.3(CYP17A1):c.*130C>T	CYP17A1	chr10	102830571	102830572	3'UTR	C	T	12.7488	17.9662	0.372046	no	63.2735	66.0574	0.796076	no	0.483871	0.477419	0.0444444	0.0518519
chr10_104031676_104031677_-_G_C	NM_000494.3(COL17A1):c.*558G>C	COL17A1	chr10	104031676	104031677	3'UTR	G	C	72.076	82.7821	0.908838	no	62.9833	102.677	0.0204137	no	0.4	0.4	0.0962963	0.0962963
chr10_121478454_121478455_-_T_C	NM_000141.4(FGFR2):c.*1402T>C	FGFR2	chr10	121478454	121478455	3'UTR	T	C					66.3947	74.2322	0.673365	no	0.380645	0.387097	0.0888889	0.0888889
chr10_121479359_121479360_-_T_C	NM_000141.4(FGFR2):c.*497T>C	FGFR2	chr10	121479359	121479360	3'UTR	T	C	26.1432	9.48471	0.00513589	yes	89.9472	93.045	0.882572	no	0.341935	0.348387	0.0962963	0.0962963
chr10_124397666_124397667_-_A_G	NM_000274.3(OAT):c.*275A>G	OAT	chr10	124397666	124397667	3'UTR	A	G					114.447	78.1992	0.23005	no	0.387097	0.393548	0.103704	0.103704
chr10_13278278_13278279_-_T_G	NM_006214.3(PHYH):c.*22T>G	PHYH	chr10	13278278	13278279	3'UTR	T	G					71.0265	106.157	0.217213	no	0.374194	0.380645	0.0740741	0.0740741
chr10_14907648_14907649_-_T_C	NM_001033855.2(DCLRE1C):c.*759T>C	DCLRE1C	chr10	14907648	14907649	3'UTR	T	C					31.7252	78.7515	0.00062378	yes	0.367742	0.374194	0.103704	0.103704
chr10_14907852_14907853_-_A_G	NM_001033855.2(DCLRE1C):c.*555A>G	DCLRE1C	chr10	14907852	14907853	3'UTR	A	G					63.0916	42.8999	0.0731269	no	0.36129	0.367742	0.0666667	0.0666667
chr10_16824237_16824238_-_T_C	NM_001081.3(CUBN):c.*737T>C	CUBN	chr10	16824237	16824238	3'UTR	T	C					80.2508	65.5253	0.348751	no	0.483871	0.490323	0.0444444	0.0444444
chr10_16824240_16824241_-_A_G	NM_001081.3(CUBN):c.*734A>G	CUBN	chr10	16824240	16824241	3'UTR	A	G	43.5669	47.4292	0.873073	no	55.4168	81.1383	0.0187974	no	0.490323	0.496774	0.037037	0.037037
chr10_16824410_16824411_-_G_C	NM_001081.3(CUBN):c.*564G>C	CUBN	chr10	16824410	16824411	3'UTR	G	C					66.0979	61.4007	0.816266	no	0.322581	0.322581	0.0962963	0.0962963
chr10_16824708_16824709_-_C_T	NM_001081.3(CUBN):c.*266C>T	CUBN	chr10	16824708	16824709	3'UTR	C	T	29.5171	37.5885	0.2659	no	61.686	76.6324	0.459693	no	0.503226	0.496774	0.0666667	0.0740741
chr10_52765434_52765435_-_G_A	NM_000242.2(MBL2):c.*2702G>A	MBL2	chr10	52765434	52765435	3'UTR	G	A					81.5759	70.7173	0.483478	no	0.348387	0.341935	0.118519	0.118519
chr10_52766707_52766708_-_A_C	NM_000242.2(MBL2):c.*1429A>C	MBL2	chr10	52766707	52766708	3'UTR	A	C	13.5805	10.3628	0.308165	no	97.37	68.2108	0.0978459	no	0.316129	0.322581	0.0888889	0.0888889
chr10_52767847_52767848_-_C_T	NM_000242.2(MBL2):c.*289C>T	MBL2	chr10	52767847	52767848	3'UTR	C	T					80.8097	66.1828	0.295158	no	0.367742	0.36129	0.118519	0.118519
chr10_52768037_52768038_-_T_G	NM_000242.2(MBL2):c.*99T>G	MBL2	chr10	52768037	52768038	3'UTR	T	G					72.832	64.7798	0.642742	no	0.419355	0.425806	0.0740741	0.0666667
chr10_53821299_53821300_-_T_A	NM_033056.3(PCDH15):c.*558T>A	PCDH15	chr10	53821299	53821300	3'UTR	T	A	28.7041	15.97	0.0369376	no	82.8741	69.4592	0.375701	no	0.387097	0.387097	0.103704	0.0962963
chr10_6011221_6011222_-_G_A	NM_000417.2(IL2RA):c.*1650G>A	IL2RA	chr10	6011221	6011222	3'UTR	G	A					76.8816	108.186	0.142216	no	0.458065	0.451613	0.0518519	0.0518519
chr10_6012764_6012765_-_C_T	NM_000417.2(IL2RA):c.*107C>T	IL2RA	chr10	6012764	6012765	3'UTR	C	T	21.9187	47.4298	0.0405892	yes	84.5813	85.1805	0.977428	no	0.522581	0.516129	0.0222222	0.0222222
chr10_70432455_70432456_-_G_A	NM_018055.4(NODAL):c.*480G>A	NODAL	chr10	70432455	70432456	3'UTR	G	A					84.8194	77.0412	0.740194	no	0.535484	0.529032	0.0444444	0.0444444
chr10_70597388_70597389_-_A_G	NM_001083116.2(PRF1):c.*664A>G	PRF1	chr10	70597388	70597389	3'UTR	A	G	19.5599	10.2733	0.311942	no	72.0776	74.0984	0.908746	no	0.483871	0.490323	0.0592593	0.0518519
chr10_73249090_73249091_-_A_G	NM_016065.3(MRPS16):c.*1761A>G	MRPS16	chr10	73249090	73249091	3'UTR	A	G					73.0893	99.4165	0.150311	no	0.509677	0.516129	0.0518519	0.0444444
chr10_73250209_73250210_-_T_C	NM_016065.3(MRPS16):c.*642T>C	MRPS16	chr10	73250209	73250210	3'UTR	T	C	19.7131	14.4303	0.645764	no	89.8319	71.4577	0.365099	no	0.529032	0.535484	0.0296296	0.0296296
chr10_73250218_73250219_-_T_TT	NM_016065.3(MRPS16):c.*633dupT	MRPS16	chr10	73250218	73250219	3'UTR	T	TT					55.3857	67.3457	0.23297	no	0.541935	0.538462	0.037037	0.0367647
chr10_76884940_76884941_-_T_A	NM_002247.3(KCNMA1):c.*2325T>A	KCNMA1	chr10	76884940	76884941	3'UTR	T	A					79.8811	93.6889	0.548236	no	0.425806	0.425806	0.0666667	0.0740741
chr10_76885039_76885040_-_A_G	NM_002247.3(KCNMA1):c.*2226A>G	KCNMA1	chr10	76885039	76885040	3'UTR	A	G	16.7232	20.4005	0.733668	no	76.4282	78.0847	0.923565	no	0.419355	0.425806	0.0814815	0.0814815
chr10_76886768_76886769_-_A_G	NM_002247.3(KCNMA1):c.*497A>G	KCNMA1	chr10	76886768	76886769	3'UTR	A	G					148.985	66.1183	0.0924982	no	0.393548	0.4	0.0666667	0.0666667
chr10_77975524_77975525_-_G_C	NM_007055.3(POLR3A):c.*1953G>C	POLR3A	chr10	77975524	77975525	3'UTR	G	C	84.5055	23.4736	0.257362	no	89.6623	74.047	0.530496	no	0.516129	0.516129	0.037037	0.037037
chr10_77976462_77976463_-_T_C	NM_007055.3(POLR3A):c.*1015T>C	POLR3A	chr10	77976462	77976463	3'UTR	T	C	23.7274	22.1293	0.797905	no	54.5445	71.4518	0.150526	no	0.451613	0.458065	0.0666667	0.0666667
chr10_77977341_77977342_-_C_T	NM_007055.3(POLR3A):c.*136C>T	POLR3A	chr10	77977341	77977342	3'UTR	C	T					85.5153	134.187	0.229727	no	0.593548	0.587097	0.0296296	0.037037
chr10_80271856_80271857_-_C_T	NM_000429.2(MAT1A):c.*1924C>T	MAT1A	chr10	80271856	80271857	3'UTR	C	T					59.5557	87.2394	0.192271	no	0.374194	0.367742	0.0962963	0.0962963
chr10_87051395_87051396_-_T_G	NM_005271.4(GLUD1):c.*355T>G	GLUD1	chr10	87051395	87051396	3'UTR	T	G					83.84	74.0665	0.666964	no	0.458065	0.464516	0.0592593	0.0518519
chr10_89214184_89214185_-_C_T	NM_000235.3(LIPA):c.*643C>T	LIPA	chr10	89214184	89214185	3'UTR	C	T					86.0636	87.3561	0.901621	no	0.380645	0.374194	0.0592593	0.0592593
chr10_90912238_90912239_-_A_G	NM_014391.2(ANKRD1):c.*627A>G	ANKRD1	chr10	90912238	90912239	3'UTR	A	G	18.1237	74.2989	0.103035	no	49.059	82.3496	0.00111263	no	0.458065	0.464516	0.0444444	0.0444444
chr10_90912317_90912322_-_ATTTT_-	NM_014391.2(ANKRD1):c.*544_*548delATTTT	ANKRD1	chr10	90912317	90912322	3'UTR	ATTTT	-	37.1409	141.91	0.508855	no					0.402516	0.415584	0.0503597	0.0522388
chr10_99711101_99711103_-_TT_TTTT	NM_004376.6(COX15):c.*2311_*2312dupTT	COX15	chr10	99711101	99711103	3'UTR	TT	TTTT					75.6455	99.6117	0.235675	no	0.365385	0.360759	0.125	0.123188
chr10_99711831_99711832_-_T_-	NM_004376.6(COX15):c.*1582delT	COX15	chr10	99711831	99711832	3'UTR	T	-					69.9116	91.149	0.359695	no	0.406452	0.409091	0.0740741	0.0746269
chr10_99713277_99713278_-_T_C	NM_004376.6(COX15):c.*136T>C	COX15	chr10	99713277	99713278	3'UTR	T	C					56.9679	83.2232	0.117913	no	0.354839	0.36129	0.111111	0.103704
chr1_100187702_100187702_-_-_T	NM_001918.3(DBT):c.*8552_*8553insT	DBT	chr1	100187702	100187702	3'UTR	-	T	86.0471	28.2461	0.145949	no	78.3395	74.0542	0.817093	no	0.467532	0.464516	0.0597015	0.0666667
chr1_100193067_100193068_-_C_G	NM_001918.3(DBT):c.*3187C>G	DBT	chr1	100193067	100193068	3'UTR	C	G					70.7363	117.734	0.15831	no	0.529032	0.529032	0.0444444	0.0444444
chr1_100193635_100193636_-_G_A	NM_001918.3(DBT):c.*2619G>A	DBT	chr1	100193635	100193636	3'UTR	G	A					96.3859	56.8488	0.193339	no	0.451613	0.445161	0.0814815	0.0814815
chr1_100194140_100194141_-_T_C	NM_001918.3(DBT):c.*2114T>C	DBT	chr1	100194140	100194141	3'UTR	T	C					81.7877	91.6846	0.683814	no	0.322581	0.329032	0.0888889	0.0888889
chr1_100195190_100195191_-_A_AA	NM_001918.3(DBT):c.*1064dupA	DBT	chr1	100195190	100195191	3'UTR	A	AA	23.1125	29.5953	0.418619	no	87.8036	78.0185	0.614897	no	0.36129	0.358974	0.0888889	0.0882353
chr1_102876530_102876531_-_G_C	NM_001854.3(COL11A1):c.*1488G>C	COL11A1	chr1	102876530	102876531	3'UTR	G	C					77.4522	65.7697	0.471938	no	0.335484	0.335484	0.0740741	0.0740741
chr11_101451574_101451575_-_G_A	NM_004621.5(TRPC6):c.*1380G>A	TRPC6	chr11	101451574	101451575	3'UTR	G	A					81.9744	51.7718	0.0482129	no	0.341935	0.335484	0.111111	0.111111
chr11_102943258_102943259_-_T_C	NM_002427.3(MMP13):c.*1007T>C	MMP13	chr11	102943258	102943259	3'UTR	T	C	13.0681	19.4441	0.223289	no	86.6759	77.2642	0.542847	no	0.36129	0.367742	0.0888889	0.0814815
chr11_110230577_110230581_-_GTAC_-	NM_002906.3(RDX):c.*1288_*1291delGTAC	RDX	chr11	110230577	110230581	3'UTR	GTAC	-	97.2668	48.544	0.385237	no	59.3407	77.7198	0.132487	no	0.468354	0.467532	0.0434783	0.0373134
chr11_110230623_110230627_-_GAGA_-	NM_002906.3(RDX):c.*1242_*1245delGAGA	RDX	chr11	110230623	110230627	3'UTR	GAGA	-	31.8849	50.2078	0.271151	no	66.2874	70.2976	0.758432	no	0.5	0.5	0.0507246	0.0522388
chr11_111783317_111783318_-_C_T	NM_024740.2(ALG9):c.*3079C>T	ALG9	chr11	111783317	111783318	3'UTR	C	T	99.6822	20.7317	0.00166527	yes	83.639	80.1301	0.87632	no	0.503226	0.496774	0.0666667	0.0666667
chr11_111783924_111783925_-_T_A	NM_024740.2(ALG9):c.*2472T>A	ALG9	chr11	111783924	111783925	3'UTR	T	A					80.4464	82.0565	0.919424	no	0.348387	0.348387	0.0888889	0.0888889
chr11_111784166_111784167_-_A_C	NM_024740.2(ALG9):c.*2230A>C	ALG9	chr11	111784166	111784167	3'UTR	A	C	30.4767	30.5195	0.998484	no	68.412	75.2748	0.643958	no	0.419355	0.425806	0.0740741	0.0666667
chr11_111784715_111784716_-_A_AA	NM_024740.2(ALG9):c.*1681dupA	ALG9	chr11	111784715	111784716	3'UTR	A	AA	62.9076	230.022	0.298129	no	84.7634	82.268	0.881322	no	0.451613	0.448718	0.0296296	0.0294118
chr11_117820190_117820191_-_C_T	NM_001680.4(FXYD2):c.*188C>T	FXYD2	chr11	117820190	117820191	3'UTR	C	T					85.7145	92.435	0.638355	no	0.574194	0.567742	0.037037	0.037037
chr11_118134830_118134831_-_G_A	NM_174934.3(SCN4B):c.*2196G>A	SCN4B	chr11	118134830	118134831	3'UTR	G	A	24.6553	25.5837	0.959606	no	79.294	90.2962	0.464327	no	0.445161	0.43871	0.0740741	0.0740741
chr11_118136356_118136357_-_G_T	NM_174934.3(SCN4B):c.*670G>T	SCN4B	chr11	118136356	118136357	3'UTR	G	T					86.9468	71.7156	0.244818	no	0.593548	0.587097	0.037037	0.037037
chr11_119024770_119024771_-_G_T	NM_001164277.1(SLC37A4):c.*139G>T	SLC37A4	chr11	119024770	119024771	3'UTR	G	T	187.25	74.6722	0.707029	no	153.161	86.4379	0.107253	no	0.529032	0.522581	0.0592593	0.0592593
chr11_123631432_123631433_-_G_A	NM_018400.3(SCN3B):c.*2366G>A	SCN3B	chr11	123631432	123631433	3'UTR	G	A	64.5202	23.6602	0.14581	no	74.4716	100.641	0.180397	no	0.380645	0.374194	0.0888889	0.0888889
chr11_123631839_123631843_-_TATT_-	NM_018400.3(SCN3B):c.*1956_*1959delTATT	SCN3B	chr11	123631839	123631843	3'UTR	TATT	-					81.3116	66.7844	0.423847	no	0.392405	0.402597	0.0869565	0.0820896
chr11_123632256_123632257_-_A_C	NM_018400.3(SCN3B):c.*1542A>C	SCN3B	chr11	123632256	123632257	3'UTR	A	C	21.0955	18.6958	0.695143	no	125.449	86.8223	0.187197	no	0.445161	0.451613	0.0666667	0.0666667
chr11_123632290_123632291_-_A_G	NM_018400.3(SCN3B):c.*1508A>G	SCN3B	chr11	123632290	123632291	3'UTR	A	G	159.462	84.7065	0.886826	no	62.9083	81.8459	0.412124	no	0.393548	0.4	0.0814815	0.0814815
chr11_123632868_123632869_-_A_G	NM_018400.3(SCN3B):c.*930A>G	SCN3B	chr11	123632868	123632869	3'UTR	A	G	51.5325	38.4953	0.73268	no	80.0249	86.3315	0.705198	no	0.458065	0.464516	0.0740741	0.0740741
chr11_123633695_123633696_-_C_T	NM_018400.3(SCN3B):c.*103C>T	SCN3B	chr11	123633695	123633696	3'UTR	C	T					70.6473	70.9288	0.982688	no	0.535484	0.529032	0.0222222	0.0222222
chr11_124920678_124920678_-_-_CC	NM_152722.4(HEPACAM):c.*459_*460insCC	HEPACAM	chr11	124920678	124920678	3'UTR	-	CC	25.595	104.934	0.156534	no					0.422078	0.429487	0.0373134	0.0367647
chr11_124920930_124920931_-_G_T	NM_152722.4(HEPACAM):c.*207G>T	HEPACAM	chr11	124920930	124920931	3'UTR	G	T	49.7886	28.6619	0.46158	no	83.3269	74.0108	0.484744	no	0.574194	0.567742	0.0518519	0.0518519
chr11_125959790_125959791_-_C_T	NM_016952.4(CDON):c.*1151C>T	CDON	chr11	125959790	125959791	3'UTR	C	T	11.5626	44.5311	0.00382379	yes	154.044	72.7227	0.00926398	no	0.529032	0.522581	0.037037	0.037037
chr11_125960340_125960341_-_T_A	NM_016952.4(CDON):c.*601T>A	CDON	chr11	125960340	125960341	3'UTR	T	A					53.923	61.6081	0.625508	no	0.509677	0.509677	0.0592593	0.0666667
chr11_125960572_125960573_-_G_A	NM_016952.4(CDON):c.*369G>A	CDON	chr11	125960572	125960573	3'UTR	G	A	19.8501	21.9706	0.890338	no	77.6993	80.7456	0.878954	no	0.522581	0.516129	0.037037	0.037037
chr11_128838983_128838984_-_G_A	NM_000220.4(KCNJ1):c.*141G>A	KCNJ1	chr11	128838983	128838984	3'UTR	G	A					64.0111	79.9081	0.366547	no	0.503226	0.496774	0.0592593	0.0592593
chr1_112913813_112913814_-_C_T	NM_003051.3(SLC16A1):c.*77C>T	SLC16A1	chr1	112913813	112913814	3'UTR	C	T	24.5255	25.5905	0.899582	no	70.0349	86.7849	0.352252	no	0.425806	0.419355	0.0740741	0.0740741
chr1_114705249_114705250_-_T_A	NM_002524.4(NRAS):c.*2844T>A	NRAS	chr1	114705249	114705250	3'UTR	T	A					68.8789	73.4359	0.784967	no	0.36129	0.36129	0.140741	0.140741
chr1_114705288_114705289_-_T_C	NM_002524.4(NRAS):c.*2805T>C	NRAS	chr1	114705288	114705289	3'UTR	T	C					89.2647	80.3943	0.625358	no	0.348387	0.354839	0.162963	0.162963
chr1_114707158_114707159_-_A_AA	NM_002524.4(NRAS):c.*935dupA	NRAS	chr1	114707158	114707159	3'UTR	A	AA					69.8567	86.327	0.222384	no	0.341935	0.339744	0.140741	0.139706
chr1_115700223_115700224_-_A_AA	NM_001232.3(CASQ2):c.*1017dupA	CASQ2	chr1	115700223	115700224	3'UTR	A	AA	66.331	40.8921	0.209597	no	78.5068	68.8915	0.521677	no	0.432258	0.429487	0.0592593	0.0588235
chr11_1752928_1752929_-_C_T	NM_001909.4(CTSD):c.*574C>T	CTSD	chr11	1752928	1752929	3'UTR	C	T					90.6248	95.0469	0.783213	no	0.6	0.593548	0.0222222	0.0296296
chr1_11786258_11786259_-_T_C	NM_005957.4(MTHFR):c.*4421T>C	MTHFR	chr1	11786258	11786259	3'UTR	T	C	66.8169	101.099	0.269926	no	90.3695	74.8289	0.382492	no	0.503226	0.509677	0.0444444	0.0444444
chr1_11790657_11790658_-_G_A	NM_005957.4(MTHFR):c.*22G>A	MTHFR	chr1	11790657	11790658	3'UTR	G	A					96.7982	62.8071	0.048006	no	0.625806	0.619355	0.0148148	0.0148148
chr11_22622806_22622807_-_T_C	NM_022725.3(FANCF):c.*1879T>C	FANCF	chr11	22622806	22622807	3'UTR	T	C					65.86	70.7034	0.736474	no	0.322581	0.329032	0.148148	0.148148
chr11_22623160_22623161_-_T_G	NM_022725.3(FANCF):c.*1525T>G	FANCF	chr11	22623160	22623161	3'UTR	T	G	27.9241	24.5299	0.745902	no	74.0566	88.2721	0.473838	no	0.393548	0.4	0.0740741	0.0740741
chr11_22624061_22624062_-_G_C	NM_022725.3(FANCF):c.*624G>C	FANCF	chr11	22624061	22624062	3'UTR	G	C					58.8655	63.2745	0.76846	no	0.374194	0.374194	0.103704	0.103704
chr11_31785572_31785573_-_T_C	NM_000280.4(PAX6):c.*4361T>C	PAX6	chr11	31785572	31785573	3'UTR	T	C					81.6671	82.4452	0.968664	no	0.348387	0.354839	0.0888889	0.0888889
chr11_31787382_31787383_-_C_T	NM_000280.4(PAX6):c.*2551C>T	PAX6	chr11	31787382	31787383	3'UTR	C	T	35.6927	568.845	0.00613149	yes	61.3898	68.9279	0.563211	no	0.580645	0.574194	0.0222222	0.0222222
chr11_31788539_31788540_-_A_C	NM_000280.4(PAX6):c.*1394A>C	PAX6	chr11	31788539	31788540	3'UTR	A	C	28.5463	19.7513	0.177358	no	94.2342	90.7085	0.863081	no	0.393548	0.4	0.0518519	0.0518519
chr11_31789598_31789599_-_T_C	NM_000280.4(PAX6):c.*335T>C	PAX6	chr11	31789598	31789599	3'UTR	T	C	31.3133	26.4275	0.750486	no	80.7653	62.8481	0.20427	no	0.367742	0.374194	0.0444444	0.0444444
chr11_32388788_32388789_-_G_T	NM_024426.4(WT1):c.*269G>T	WT1	chr11	32388788	32388789	3'UTR	G	T	27.1264	33.0545	0.849574	no	63.2962	78.8827	0.230086	no	0.490323	0.483871	0.0592593	0.0592593
chr11_36592448_36592449_-_A_C	NM_000536.3(RAG2):c.*136A>C	RAG2	chr11	36592448	36592449	3'UTR	A	C	12.7743	16.0386	0.63471	no	81.855	68.8088	0.438334	no	0.329032	0.335484	0.111111	0.111111
chr11_36592551_36592552_-_G_T	NM_000536.3(RAG2):c.*33G>T	RAG2	chr11	36592551	36592552	3'UTR	G	T					89.6666	81.6092	0.663067	no	0.303226	0.296774	0.0814815	0.0888889
chr11_44262384_44262385_-_T_C	NM_021926.3(ALX4):c.*2469T>C	ALX4	chr11	44262384	44262385	3'UTR	T	C					71.9528	64.5993	0.688787	no	0.529032	0.535484	0.0444444	0.0444444
chr11_46857918_46857919_-_C_G	NM_002334.3(LRP4):c.*1064C>G	LRP4	chr11	46857918	46857919	3'UTR	C	G					83.1906	67.5195	0.513599	no	0.483871	0.483871	0.037037	0.037037
chr11_46858677_46858678_-_C_T	NM_002334.3(LRP4):c.*305C>T	LRP4	chr11	46858677	46858678	3'UTR	C	T	34.2685	37.2715	0.904565	no	72.9103	72.9405	0.998785	no	0.567742	0.56129	0.037037	0.037037
chr1_151340855_151340856_-_C_T	NM_000449.3(RFX5):c.*1330C>T	RFX5	chr1	151340855	151340856	3'UTR	C	T	25.3479	21.0514	0.693545	no	83.4356	82.472	0.961337	no	0.432258	0.425806	0.0740741	0.0740741
chr1_151341491_151341492_-_G_-	NM_000449.3(RFX5):c.*694delG	RFX5	chr1	151341491	151341492	3'UTR	G	-	17.9087	29.0268	0.552751	no	103.901	83.4988	0.439703	no	0.496774	0.493506	0.0518519	0.0522388
chr1_151341821_151341822_-_A_C	NM_000449.3(RFX5):c.*364A>C	RFX5	chr1	151341821	151341822	3'UTR	A	C	18.6304	25.0292	0.569222	no	62.7977	80.4288	0.136074	no	0.412903	0.419355	0.0888889	0.0888889
chr11_5225541_5225542_-_A_T	NM_000518.4(HBB):c.*56A>T	HBB	chr11	5225541	5225542	3'UTR	A	T	15.2716	13.2851	0.590734	no	58.2805	122.176	0.0117114	no	0.445161	0.445161	0.0814815	0.0814815
chr11_5225544_5225545_-_C_A	NM_000518.4(HBB):c.*53C>A	HBB	chr11	5225544	5225545	3'UTR	C	A	15.2716	29.2769	0.206727	no	58.2805	71.3233	0.372963	no	0.445161	0.43871	0.0814815	0.0888889
chr1_154166275_154166276_-_C_T	NM_152263.3(TPM3):c.*1661C>T	TPM3	chr1	154166275	154166276	3'UTR	C	T					85.186	56.3978	0.132922	no	0.445161	0.43871	0.0740741	0.0814815
chr1_154582475_154582483_-_CATGCCCC_CATGCCCCCATGCCCC	NM_001111.4(ADAR):c.*2323_*2330dupCATGCCCC	ADAR	chr1	154582475	154582483	3'UTR	CATGCCCC	CATGCCCCCATGCCCC					81.9291	63.1428	0.348223	no	0.561728	0.570588	0.0211268	0.02
chr1_154584278_154584279_-_A_G	NM_001111.4(ADAR):c.*527A>G	ADAR	chr1	154584278	154584279	3'UTR	A	G	20.032	61.2562	0.0321037	yes	80.4393	89.289	0.568786	no	0.464516	0.470968	0.037037	0.037037
chr1_158611129_158611130_-_T_G	NM_003126.3(SPTA1):c.*134T>G	SPTA1	chr1	158611129	158611130	3'UTR	T	G	45.908	18.2723	0.0157085	yes	78.4415	64.6624	0.283741	no	0.451613	0.458065	0.0592593	0.0592593
chr1_158611131_158611133_-_TG_TGTG	NM_003126.3(SPTA1):c.*131_*132dup	SPTA1	chr1	158611131	158611133	3'UTR	TG	TGTG	23.275	22.8629	0.93974	no	50.737	45.978	0.547811	no	0.442308	0.443038	0.0588235	0.057971
chr1_160278215_160278216_-_G_T	NM_002857.3(PEX19):c.*1335G>T	PEX19	chr1	160278215	160278216	3'UTR	G	T					67.3164	87.6614	0.286732	no	0.341935	0.335484	0.133333	0.133333
chr1_160278220_160278221_-_G_A	NM_002857.3(PEX19):c.*1330G>A	PEX19	chr1	160278220	160278221	3'UTR	G	A					87.3966	84.8812	0.907203	no	0.335484	0.329032	0.133333	0.140741
chr1_160278652_160278653_-_A_G	NM_002857.3(PEX19):c.*898A>G	PEX19	chr1	160278652	160278653	3'UTR	A	G					69.9287	74.2081	0.805514	no	0.458065	0.464516	0.0666667	0.0666667
chr1_160278888_160278889_-_C_T	NM_002857.3(PEX19):c.*662C>T	PEX19	chr1	160278888	160278889	3'UTR	C	T					91.7496	85.4566	0.711663	no	0.548387	0.541935	0.0444444	0.0444444
chr1_16124424_16124425_-_C_T	NM_004431.4(EPHA2):c.*790C>T	EPHA2	chr1	16124424	16124425	3'UTR	C	T					65.4825	63.6183	0.9074	no	0.303226	0.296774	0.0962963	0.0962963
chr11_64740940_64740941_-_G_C	NM_153819.1(RASGRP2):c.371+7G>C	RASGRP2	chr11	64740940	64740941	3'UTR	G	C	100.383	41.3349	0.546432	no	95.7363	67.9299	0.364893	no	0.56129	0.56129	0.0666667	0.0666667
chr11_65718487_65718488_-_T_C	NM_032193.3(RNASEH2C):c.*1295T>C	RNASEH2C	chr11	65718487	65718488	3'UTR	T	C	102.037	28.0821	0.0108246	yes	86.1553	77.6123	0.68676	no	0.516129	0.522581	0.0518519	0.0518519
chr11_6613329_6613330_-_T_TT	NM_000391.3(TPP1):c.*1216dupT	TPP1	chr11	6613329	6613330	3'UTR	T	TT	16.4028	24.4771	0.519395	no	75.5848	46.6983	0.095595	no	0.490323	0.487179	0.0518519	0.0514706
chr1_169464949_169464951_-_AA_-	NM_006996.2(SLC19A2):c.*898_*899delAA	SLC19A2	chr1	169464949	169464951	3'UTR	AA	-					87.8869	82.619	0.777684	no	0.301282	0.305195	0.125	0.126866
chr1_169512373_169512374_-_T_C	NM_000130.4(F5):c.*1939T>C	F5	chr1	169512373	169512374	3'UTR	T	C	10.9574	22.9665	0.122864	no					0.445161	0.451613	0.0888889	0.0888889
chr1_169512532_169512533_-_G_T	NM_000130.4(F5):c.*1780G>T	F5	chr1	169512532	169512533	3'UTR	G	T					67.3476	63.0034	0.8469	no	0.470968	0.464516	0.0444444	0.0444444
chr1_169514163_169514164_-_C_G	NM_000130.4(F5):c.*149C>G	F5	chr1	169514163	169514164	3'UTR	C	G					76.9062	74.9741	0.905749	no	0.354839	0.354839	0.125926	0.125926
chr11_71435050_71435051_-_C_T	NM_001360.2(DHCR7):c.*324C>T	DHCR7	chr11	71435050	71435051	3'UTR	C	T	65.3442	10.9189	0.000589103	yes	98.1855	91.8899	0.793081	no	0.541935	0.535484	0.0666667	0.0666667
chr11_71435255_71435256_-_G_A	NM_001360.2(DHCR7):c.*119G>A	DHCR7	chr11	71435255	71435256	3'UTR	G	A					77.434	79.6543	0.893381	no	0.548387	0.541935	0.037037	0.037037
chr1_171635593_171635594_-_A_G	NM_000261.1(MYOC):c.*331A>G	MYOC	chr1	171635593	171635594	3'UTR	A	G					58.8031	86.1987	0.169011	no	0.425806	0.432258	0.0814815	0.0814815
chr11_74455043_74455044_-_G_C	NM_005472.4(KCNE3):c.*2208G>C	KCNE3	chr11	74455043	74455044	3'UTR	G	C	26.5253	29.6493	0.562463	no	78.6795	75.6584	0.874099	no	0.445161	0.445161	0.0444444	0.0444444
chr11_74455767_74455768_-_G_T	NM_005472.4(KCNE3):c.*1484G>T	KCNE3	chr11	74455767	74455768	3'UTR	G	T					46.5196	106.348	0.017801	no	0.490323	0.483871	0.0222222	0.0222222
chr11_74456329_74456332_-_TTT_TTTTTT	NM_005472.4(KCNE3):c.*920_*922dupTTT	KCNE3	chr11	74456329	74456332	3'UTR	TTT	TTTTTT	41.6247	75.5762	0.565757	no	65.0021	77.3639	0.3595	no	0.43949	0.43125	0.0218978	0.0214286
chr11_791705_791706_-_A_G	NM_024698.5(SLC25A22):c.*209A>G	SLC25A22	chr11	791705	791706	3'UTR	A	G					53.8778	89.3818	0.0845331	no	0.541935	0.548387	0.0444444	0.037037
chr1_179550832_179550833_-_C_A	NM_014625.3(NPHS2):c.*340C>A	NPHS2	chr1	179550832	179550833	3'UTR	C	A	28.0693	14.618	0.0460016	no	67.9893	74.1679	0.752684	no	0.503226	0.496774	0.0444444	0.0444444
chr1_182382039_182382040_-_G_A	NM_002065.6(GLUL):c.*2365G>A	GLUL	chr1	182382039	182382040	3'UTR	G	A	19.2645	27.3741	0.208225	no	93.6333	57.9544	0.11799	no	0.43871	0.432258	0.0962963	0.103704
chr1_182382091_182382092_-_C_T	NM_002065.6(GLUL):c.*2313C>T	GLUL	chr1	182382091	182382092	3'UTR	C	T	16.4636	15.1365	0.768035	no	79.9215	70.0695	0.560562	no	0.432258	0.425806	0.111111	0.111111
chr1_182382426_182382427_-_G_A	NM_002065.6(GLUL):c.*1978G>A	GLUL	chr1	182382426	182382427	3'UTR	G	A					60.8876	91.1682	0.054792	no	0.541935	0.535484	0.0592593	0.0666667
chr1_182382446_182382447_-_G_A	NM_002065.6(GLUL):c.*1958G>A	GLUL	chr1	182382446	182382447	3'UTR	G	A	44.3339	18.3423	0.137201	no	83.6062	68.8964	0.343984	no	0.516129	0.509677	0.0740741	0.0740741
chr1_182383047_182383048_-_T_G	NM_002065.6(GLUL):c.*1357T>G	GLUL	chr1	182383047	182383048	3'UTR	T	G					79.3107	79.3182	0.999752	no	0.432258	0.43871	0.0666667	0.0666667
chr1_182383423_182383424_-_T_G	NM_002065.6(GLUL):c.*981T>G	GLUL	chr1	182383423	182383424	3'UTR	T	G	65.5771	44.1283	0.415391	no	81.7921	71.1501	0.51769	no	0.470968	0.477419	0.0740741	0.0666667
chr11_86948099_86948100_-_A_G	NM_012193.3(FZD4):c.*3042A>G	FZD4	chr11	86948099	86948100	3'UTR	A	G					98.4634	88.5949	0.634353	no	0.490323	0.496774	0.0518519	0.0518519
chr11_86948181_86948186_-_TGGGT_AGTTAAAAGC	NM_012193.3(FZD4):c.*2956_*2960delTGGGTinsAGTTAAAAGC	FZD4	chr11	86948181	86948186	3'UTR	TGGGT	AGTTAAAAGC					56.4657	120.165	0.00739101	no	0.490566	0.47561	0.0431655	0.0486111
chr11_86948624_86948625_-_A_G	NM_012193.3(FZD4):c.*2517A>G	FZD4	chr11	86948624	86948625	3'UTR	A	G	66.9591	40.6718	0.5988	no	64.874	82.1015	0.32552	no	0.43871	0.445161	0.0296296	0.0296296
chr11_86950796_86950797_-_A_G	NM_012193.3(FZD4):c.*345A>G	FZD4	chr11	86950796	86950797	3'UTR	A	G					64.5404	45.9887	0.138946	no	0.490323	0.496774	0.0740741	0.0740741
chr11_88293752_88293753_-_T_C	NM_001814.5(CTSC):c.*253T>C	CTSC	chr11	88293752	88293753	3'UTR	T	C					65.7458	86.5266	0.170458	no	0.348387	0.354839	0.0888889	0.0888889
chr11_94417828_94417829_-_A_G	NM_005591.3(MRE11):c.*2296A>G	MRE11	chr11	94417828	94417829	3'UTR	A	G	8.80078	81.8473	0.0126049	yes	84.6178	88.4288	0.870903	no	0.374194	0.380645	0.0740741	0.0740741
chr11_94419554_94419555_-_A_C	NM_005590.3(MRE11):c.*570A>C	MRE11	chr11	94419554	94419555	3'UTR	A	C	21.4628	35.4044	0.168964	no	83.2631	70.154	0.423045	no	0.36129	0.367742	0.0962963	0.0962963
chr11_94419811_94419812_-_G_A	NM_005591.3(MRE11):c.*313G>A	MRE11	chr11	94419811	94419812	3'UTR	G	A					83.643	88.785	0.805412	no	0.348387	0.341935	0.111111	0.111111
chr11_95834139_95834140_-_C_T	NM_016156.5(MTMR2):c.*1150C>T	MTMR2	chr11	95834139	95834140	3'UTR	C	T	11.4171	68.5398	0.0150692	yes	87.4083	75.4813	0.584663	no	0.374194	0.367742	0.0962963	0.0962963
chr11_9778976_9778977_-_C_T	NM_030962.3(SBF2):c.*1441C>T	SBF2	chr11	9778976	9778977	3'UTR	C	T					76.0001	83.6611	0.662844	no	0.322581	0.316129	0.0962963	0.103704
chr11_9779542_9779543_-_G_A	NM_030962.3(SBF2):c.*875G>A	SBF2	chr11	9779542	9779543	3'UTR	G	A	80.6917	48.7912	0.254897	no	90.5784	82.4318	0.665068	no	0.503226	0.496774	0.0444444	0.0444444
chr11_9779786_9779787_-_T_C	NM_030962.3(SBF2):c.*631T>C	SBF2	chr11	9779786	9779787	3'UTR	T	C	26.6088	16.1978	0.420236	no	87.1134	75.0212	0.56206	no	0.451613	0.458065	0.0518519	0.0444444
chr1_203216159_203216160_-_T_C	NM_003465.2(CHIT1):c.*729T>C	CHIT1	chr1	203216159	203216160	3'UTR	T	C	39.3454	14.6458	0.341478	no					0.470968	0.477419	0.0518519	0.0518519
chr1_203216608_203216609_-_G_C	NM_003465.2(CHIT1):c.*280G>C	CHIT1	chr1	203216608	203216609	3'UTR	G	C	12.8514	42.2548	0.00600268	yes	101.578	102.814	0.954195	no	0.56129	0.56129	0.0296296	0.0296296
chr1_20651228_20651232_-_ACTT_ACTTACTT	NM_032409.2(PINK1):c.*538_*541dupAAGT	PINK1	chr1	20651228	20651232	3'UTR	ACTT	ACTTACTT					98.0472	49.9819	0.0203958	no	0.455696	0.450617	0.0869565	0.0915493
chr12_101747100_101747101_-_C_T	NM_024312.4(GNPTAB):c.*63C>T	GNPTAB	chr12	101747100	101747101	3'UTR	C	T	34.7097	10.6199	0.151716	no	86.3491	81.6707	0.840475	no	0.432258	0.425806	0.0518519	0.0592593
chr12_102397057_102397058_-_G_A	NM_000618.4(IGF1):c.*5449G>A	IGF1	chr12	102397057	102397058	3'UTR	G	A					75.726	76.6521	0.94684	no	0.509677	0.503226	0.0666667	0.0666667
chr12_102397427_102397428_-_T_C	NM_000618.4(IGF1):c.*5079T>C	IGF1	chr12	102397427	102397428	3'UTR	T	C					116.484	71.9828	0.112187	no	0.406452	0.412903	0.0888889	0.0888889
chr12_102397966_102397967_-_C_T	NM_000618.4(IGF1):c.*4540C>T	IGF1	chr12	102397966	102397967	3'UTR	C	T					69.9548	66.4081	0.862485	no	0.341935	0.335484	0.133333	0.133333
chr12_102398099_102398103_-_GTTT_-	NM_000618.4(IGF1):c.*4404_*4407delGTTT	IGF1	chr12	102398099	102398103	3'UTR	GTTT	-					68.377	54.2513	0.128049	no	0.310127	0.311688	0.057971	0.0597015
chr12_102400131_102400132_-_A_AA	NM_000618.4(IGF1):c.*2375dupA	IGF1	chr12	102400131	102400132	3'UTR	A	AA	15.0889	21.5686	0.485387	no	78.9399	87.9307	0.625645	no	0.470968	0.467949	0.037037	0.0367647
chr12_102400144_102400145_-_A_G	NM_000618.4(IGF1):c.*2362A>G	IGF1	chr12	102400144	102400145	3'UTR	A	G					58.6776	60.6425	0.838785	no	0.432258	0.43871	0.037037	0.037037
chr12_102400753_102400754_-_C_A	NM_000618.4(IGF1):c.*1753C>A	IGF1	chr12	102400753	102400754	3'UTR	C	A					58.4159	66.0289	0.632988	no	0.354839	0.348387	0.133333	0.133333
chr12_102400782_102400783_-_C_T	NM_000618.4(IGF1):c.*1724C>T	IGF1	chr12	102400782	102400783	3'UTR	C	T	42.8517	52.0165	0.702517	no	76.5296	81.3422	0.768833	no	0.393548	0.387097	0.111111	0.118519
chr12_109556336_109556337_-_A_C	NM_052845.3(MMAB):c.*691A>C	MMAB	chr12	109556336	109556337	3'UTR	A	C					76.4127	75.4483	0.952848	no	0.541935	0.548387	0.0296296	0.0296296
chr12_109556518_109556519_-_C_T	NM_052845.3(MMAB):c.*509C>T	MMAB	chr12	109556518	109556519	3'UTR	C	T	27.2731	17.8112	0.336596	no	66.0594	89.2177	0.377686	no	0.483871	0.477419	0.0444444	0.0444444
chr12_114355384_114355385_-_T_C	NM_000192.3(TBX5):c.*147T>C	TBX5	chr12	114355384	114355385	3'UTR	T	C	63.4227	31.1861	0.338476	no	68.8015	82.1711	0.297942	no	0.43871	0.445161	0.037037	0.037037
chr12_114670301_114670302_-_T_-	NM_005996.3(TBX3):c.*1539delT	TBX3	chr12	114670301	114670302	3'UTR	T	-	24.3337	100.945	0.045846	yes	77.0105	84.891	0.635257	no	0.341935	0.344156	0.0740741	0.0746269
chr1_211477052_211477053_-_C_T	NM_183059.2(RD3):c.*1983C>T	RD3	chr1	211477052	211477053	3'UTR	C	T					81.3613	89.6864	0.619548	no	0.43871	0.432258	0.0666667	0.0666667
chr12_13562669_13562673_-_TCTT_-	NM_000834.4(GRIN2B):c.*110_*113delTCTT	GRIN2B	chr12	13562669	13562673	3'UTR	TCTT	-	54.4603	12.9115	0.0046682	yes	72.9049	84.6632	0.590823	no	0.518987	0.525974	0.0434783	0.0447761
chr12_1792865_1792866_-_A_G	NM_172364.4(CACNA2D4):c.*789A>G	CACNA2D4	chr12	1792865	1792866	3'UTR	A	G	29.0872	17.3896	0.352201	no	90.2465	47.2152	0.0293961	no	0.43871	0.445161	0.0592593	0.0592593
chr12_1793071_1793072_-_G_C	NM_172364.4(CACNA2D4):c.*583G>C	CACNA2D4	chr12	1793071	1793072	3'UTR	G	C	311.302	20.1491	0.156401	no	66.8755	83.1942	0.330913	no	0.509677	0.509677	0.0296296	0.0296296
chr1_21822247_21822248_-_C_T	NM_005529.6(HSPG2):c.*1068C>T	HSPG2	chr1	21822247	21822248	3'UTR	C	T	7.07595	83.2501	1.84418e-07	yes	61.4004	76.2844	0.408041	no	0.567742	0.56129	0.0444444	0.0444444
chr1_220148481_220148482_-_G_T	NM_012414.3(RAB3GAP2):c.*2769G>T	RAB3GAP2	chr1	220148481	220148482	3'UTR	G	T	129.419	23.2151	0.220825	no	90.798	67.4024	0.268061	no	0.43871	0.432258	0.0814815	0.0888889
chr1_220148903_220148904_-_T_C	NM_012414.3(RAB3GAP2):c.*2347T>C	RAB3GAP2	chr1	220148903	220148904	3'UTR	T	C					77.0267	83.6422	0.696897	no	0.309677	0.316129	0.118519	0.111111
chr1_220149979_220149980_-_C_T	NM_012414.3(RAB3GAP2):c.*1271C>T	RAB3GAP2	chr1	220149979	220149980	3'UTR	C	T	28.7148	28.6606	0.994849	no	91.9776	77.3167	0.473486	no	0.380645	0.374194	0.111111	0.118519
chr1_220150451_220150453_-_AA_AAAA	NM_012414.3(RAB3GAP2):c.*798_*799dupAA	RAB3GAP2	chr1	220150451	220150453	3'UTR	AA	AAAA					50.3789	61.559	0.365958	no	0.307692	0.303797	0.102941	0.101449
chr12_21536322_21536323_-_G_-	NM_021957.3(GYS2):c.*631delG	GYS2	chr12	21536322	21536323	3'UTR	G	-	17.3229	10.0431	0.249628	no	77.1075	84.2604	0.672763	no	0.348387	0.344156	0.111111	0.11194
chr12_25208022_25208023_-_A_G	NM_004985.4(KRAS):c.*1772A>G	KRAS	chr12	25208022	25208023	3'UTR	A	G	10.3896	13.7749	0.549514	no	84.4745	107.91	0.400885	no	0.445161	0.451613	0.0666667	0.0666667
chr1_225402102_225402103_-_T_C	NM_002296.3(LBR):c.*1200T>C	LBR	chr1	225402102	225402103	3'UTR	T	C	17.8949	10.8064	0.108214	no	51.293	63.6679	0.274021	no	0.374194	0.380645	0.111111	0.103704
chr1_231364981_231364983_-_GG_-	NM_022051.2(EGLN1):c.*1428_*1429delGG	EGLN1	chr1	231364981	231364983	3'UTR	GG	-					70.8618	66.1402	0.806726	no	0.339744	0.331169	0.0808824	0.0820896
chr12_32791400_32791401_-_C_T	NM_004572.3(PKP2):c.*1023C>T	PKP2	chr12	32791400	32791401	3'UTR	C	T	33.4995	24.9857	0.809788	no	68.1201	74.3585	0.63489	no	0.464516	0.458065	0.0740741	0.0740741
chr1_235661501_235661502_-_C_T	NM_000081.3(LYST):c.*1438C>T	LYST	chr1	235661501	235661502	3'UTR	C	T	23.6987	39.6202	0.0389096	no	97.0829	81.7468	0.523024	no	0.496774	0.490323	0.0740741	0.0740741
chr1_235662032_235662033_-_G_A	NM_000081.3(LYST):c.*907G>A	LYST	chr1	235662032	235662033	3'UTR	G	A	43.87	10.5242	0.0128297	yes	77.3634	67.6009	0.608213	no	0.406452	0.4	0.0814815	0.0888889
chr1_235662066_235662067_-_G_C	NM_000081.3(LYST):c.*873G>C	LYST	chr1	235662066	235662067	3'UTR	G	C					61.0452	93.6188	0.0810462	no	0.419355	0.419355	0.0740741	0.0740741
chr1_23802172_23802173_-_T_C	NM_000191.2(HMGCL):c.*290T>C	HMGCL	chr1	23802172	23802173	3'UTR	T	C					102.564	83.7622	0.586668	no	0.567742	0.574194	0.037037	0.037037
chr1_23802268_23802269_-_C_G	NM_000191.2(HMGCL):c.*194C>G	HMGCL	chr1	23802268	23802269	3'UTR	C	G					82.231	65.11	0.301639	no	0.593548	0.593548	0.0222222	0.0222222
chr1_2404930_2404931_-_C_T	NM_153818.1(PEX10):c.*835C>T	PEX10	chr1	2404930	2404931	3'UTR	C	T					91.8459	69.8003	0.358641	no	0.567742	0.56129	0.0222222	0.0222222
chr1_2405355_2405356_-_G_A	NM_153818.1(PEX10):c.*410G>A	PEX10	chr1	2405355	2405356	3'UTR	G	A	24.7487	24.9889	0.988483	no	61.1179	73.346	0.43993	no	0.554839	0.548387	0.037037	0.037037
chr12_42458516_42458517_-_T_C	NM_153026.2(PRICKLE1):c.*1292T>C	PRICKLE1	chr12	42458516	42458517	3'UTR	T	C					63.6189	68.0541	0.726259	no	0.387097	0.393548	0.0814815	0.0740741
chr12_42458825_42458826_-_C_A	NM_153026.2(PRICKLE1):c.*983C>A	PRICKLE1	chr12	42458825	42458826	3'UTR	C	A					57.9185	71.2724	0.268843	no	0.445161	0.43871	0.0814815	0.0814815
chr12_42459213_42459215_-_AA_-	NM_153026.2(PRICKLE1):c.*594_*595delAA	PRICKLE1	chr12	42459213	42459215	3'UTR	AA	-					70.8004	95.078	0.216309	no	0.314103	0.318182	0.132353	0.126866
chr1_243500089_243500089_-_-_AAGTC	NM_006642.4(SDCCAG8):c.*304_*305insGACTT	SDCCAG8	chr1	243500089	243500089	3'UTR	-	AAGTC					73.9281	98.6269	0.280344	no	0.357143	0.358491	0.0895522	0.0863309
chr12_47842482_47842483_-_G_A	NM_001017535.1(VDR):c.*2263G>A	VDR	chr12	47842482	47842483	3'UTR	G	A	50.1987	86.9588	0.537686	no	77.9857	75.1708	0.873706	no	0.529032	0.522581	0.0296296	0.0296296
chr12_47842880_47842881_-_G_A	NM_001017535.1(VDR):c.*1865G>A	VDR	chr12	47842880	47842881	3'UTR	G	A					84.8155	150.71	0.150287	no	0.470968	0.464516	0.0444444	0.0444444
chr12_47843492_47843493_-_T_A	NM_001017535.1(VDR):c.*1253T>A	VDR	chr12	47843492	47843493	3'UTR	T	A	152.817	331.495	0.750241	no	70.0798	76.4132	0.726448	no	0.567742	0.567742	0.037037	0.037037
chr12_47843554_47843555_-_G_A	NM_001017535.1(VDR):c.*1191G>A	VDR	chr12	47843554	47843555	3'UTR	G	A	118.699	49.9587	0.494821	no	60.5412	76.9686	0.275761	no	0.554839	0.548387	0.037037	0.037037
chr12_49019392_49019393_-_C_T	NM_003482.3(KMT2D):c.*2387C>T	KMT2D	chr12	49019392	49019393	3'UTR	C	T	58.8537	10.4604	0.0118462	yes	60.7742	51.842	0.288507	no	0.483871	0.477419	0.0666667	0.0740741
chr12_49019797_49019798_-_T_-	NM_003482.3(KMT2D):c.*1982delT	KMT2D	chr12	49019797	49019798	3'UTR	T	-	37.0707	35.7399	0.971977	no	54.6368	63.1057	0.436704	no	0.432258	0.435065	0.0444444	0.0447761
chr12_50987063_50987064_-_G_A	NM_000617.2(SLC11A2):c.*1261G>A	SLC11A2	chr12	50987063	50987064	3'UTR	G	A	48.5478	63.5497	0.735789	no	118.504	98.0536	0.488911	no	0.419355	0.412903	0.0592593	0.0592593
chr12_50987909_50987910_-_G_A	NM_000617.2(SLC11A2):c.*415G>A	SLC11A2	chr12	50987909	50987910	3'UTR	G	A					81.9409	75.9813	0.733966	no	0.316129	0.309677	0.125926	0.133333
chr12_51026320_51026321_-_G_A	NM_000617.2(SLC11A2):c.-50G>A	SLC11A2	chr12	51026320	51026321	3'UTR	G	A	22.747	51.6835	0.243795	no	65.9744	65.6853	0.985372	no	0.666667	0.659864	0.0393701	0.0393701
chr12_56449502_56449503_-_G_GG	NM_012064.3(MIP):c.*1777dupG	MIP	chr12	56449502	56449503	3'UTR	G	GG					76.663	84.4934	0.5711	no	0.419355	0.423077	0.0740741	0.0735294
chr12_57762695_57762696_-_G_A	NM_000785.3(CYP27B1):c.*446G>A	CYP27B1	chr12	57762695	57762696	3'UTR	G	A	58.7231	9.233	0.00157401	yes	81.1171	90.3698	0.623391	no	0.503226	0.496774	0.0518519	0.0518519
chr12_6328917_6328918_-_A_T	NM_001065.3(TNFRSF1A):c.*394A>T	TNFRSF1A	chr12	6328917	6328918	3'UTR	A	T					52.8518	62.2579	0.422921	no	0.406452	0.406452	0.0518519	0.0518519
chr12_6347292_6347293_-_A_C	NM_001038.5(SCNN1A):c.*580A>C	SCNN1A	chr12	6347292	6347293	3'UTR	A	C	13.6504	50.3967	0.0870288	no	73.0381	85.7463	0.443717	no	0.619355	0.625806	0.0592593	0.0592593
chr12_64713897_64713898_-_C_T	NM_002076.3(GNS):c.*2843C>T	GNS	chr12	64713897	64713898	3'UTR	C	T					117.647	211.402	0.284309	no	0.574194	0.567742	0.0296296	0.0296296
chr12_64716064_64716065_-_A_G	NM_002076.3(GNS):c.*676A>G	GNS	chr12	64716064	64716065	3'UTR	A	G					112.227	51.5822	0.012527	no	0.477419	0.483871	0.0666667	0.0666667
chr12_64716588_64716589_-_G_A	NM_002076.3(GNS):c.*152G>A	GNS	chr12	64716588	64716589	3'UTR	G	A					72.9323	88.2213	0.275035	no	0.503226	0.496774	0.0296296	0.037037
chr12_66348088_66348089_-_T_A	NM_021150.3(GRIP1):c.*930T>A	GRIP1	chr12	66348088	66348089	3'UTR	T	A					61.9746	70.1412	0.702387	no	0.412903	0.412903	0.0814815	0.0814815
chr12_8603147_8603148_-_A_G	NM_020661.3(AICDA):c.*1136A>G	AICDA	chr12	8603147	8603148	3'UTR	A	G					74.4574	64.2448	0.643702	no	0.490323	0.496774	0.0296296	0.0296296
chr12_8603479_8603480_-_A_T	NM_020661.3(AICDA):c.*804A>T	AICDA	chr12	8603479	8603480	3'UTR	A	T	32.1856	36.1139	0.82358	no	81.3535	99.9468	0.406548	no	0.412903	0.412903	0.0592593	0.0666667
chr12_913070_913071_-_C_A	NM_134424.3(RAD52):c.*320C>A	RAD52	chr12	913070	913071	3'UTR	C	A					56.3217	49.9509	0.717282	no	0.445161	0.43871	0.0814815	0.0888889
chr12_95973614_95973615_-_G_A	NM_002108.3(HAL):c.*617G>A	HAL	chr12	95973614	95973615	3'UTR	G	A	21.3798	36.7136	0.0113689	no	103.854	85.9422	0.462368	no	0.412903	0.406452	0.0888889	0.0888889
chr12_95973676_95973677_-_G_A	NM_002108.3(HAL):c.*555G>A	HAL	chr12	95973676	95973677	3'UTR	G	A					79.6507	67.1994	0.463321	no	0.367742	0.36129	0.111111	0.111111
chr13_100530355_100530356_-_G_A	NM_000282.3(PCCA):c.*190C>T	PCCA	chr13	100530355	100530356	3'UTR	G	A					95.0184	66.112	0.121634	no	0.367742	0.36129	0.0814815	0.0814815
chr13_101721607_101721611_-_ATTA_ATTAATTA	NM_004115.3(FGF14):c.*1220_*1223dupATTA	FGF14	chr13	101721607	101721611	3'UTR	ATTA	ATTAATTA					60.6103	63.4876	0.784634	no	0.35443	0.345679	0.101449	0.105634
chr13_110149885_110149886_-_G_T	NM_001845.5(COL4A1):c.*477G>T	COL4A1	chr13	110149885	110149886	3'UTR	G	T	23.8999	12.6993	0.166097	no	97.2055	85.6904	0.620007	no	0.406452	0.4	0.0888889	0.0962963
chr13_20188418_20188419_-_A_G	NM_004004.5(GJB2):c.*482A>G	GJB2	chr13	20188418	20188419	3'UTR	A	G	36.8111	55.1446	0.43628	no	69.2514	83.9126	0.410545	no	0.393548	0.4	0.0666667	0.0666667
chr13_20221980_20221981_-_C_T	NM_006783.4(GJB6):c.*714C>T	GJB6	chr13	20221980	20221981	3'UTR	C	T					79.447	77.485	0.905512	no	0.458065	0.451613	0.037037	0.037037
chr13_20222135_20222136_-_C_T	NM_006783.4(GJB6):c.*559C>T	GJB6	chr13	20222135	20222136	3'UTR	C	T	16.706	22.029	0.37695	no	88.2103	80.5064	0.605377	no	0.380645	0.374194	0.0814815	0.0814815
chr13_24882286_24882287_-_T_C	NM_018451.4(CENPJ):c.*890T>C	CENPJ	chr13	24882286	24882287	3'UTR	T	C					98.0856	83.2252	0.555163	no	0.354839	0.36129	0.111111	0.111111
chr13_24882606_24882607_-_T_C	NM_018451.4(CENPJ):c.*570T>C	CENPJ	chr13	24882606	24882607	3'UTR	T	C					63.0262	73.4516	0.633236	no	0.425806	0.432258	0.0888889	0.0814815
chr13_36846754_36846755_-_C_T	NM_001127217.2(SMAD9):c.*1921C>T	SMAD9	chr13	36846754	36846755	3'UTR	C	T	25.8974	51.4831	0.170746	no	86.5926	63.4226	0.0987665	no	0.380645	0.374194	0.0666667	0.0666667
chr13_36848005_36848007_-_AG_-	NM_001127217.2(SMAD9):c.*669_*670delAG	SMAD9	chr13	36848005	36848007	3'UTR	AG	-					84.863	55.185	0.0477809	no	0.397436	0.396104	0.0661765	0.0671642
chr13_36848672_36848673_-_G_C	NM_001127217.2(SMAD9):c.*3G>C	SMAD9	chr13	36848672	36848673	3'UTR	G	C					56.2735	97.4296	0.110645	no	0.412903	0.412903	0.0888889	0.0888889
chr13_47943039_47943040_-_C_A	NM_003850.2(SUCLA2):c.*331C>A	SUCLA2	chr13	47943039	47943040	3'UTR	C	A					70.3051	75.6939	0.68845	no	0.329032	0.322581	0.155556	0.155556
chr13_51932950_51932951_-_C_T	NM_000053.3(ATP7B):c.*1805C>T	ATP7B	chr13	51932950	51932951	3'UTR	C	T	43.7784	121.037	0.0653792	yes	78.6949	79.5612	0.953666	no	0.503226	0.496774	0.0296296	0.0296296
chr13_77896686_77896687_-_G_C	NM_000115.4(EDNRB):c.*1513G>C	EDNRB	chr13	77896686	77896687	3'UTR	G	C	50.2024	106.845	0.346098	no	69.8229	85.9427	0.403047	no	0.458065	0.458065	0.0296296	0.0296296
chr1_40072906_40072907_-_T_C	NM_000310.3(PPT1):c.*1154T>C	PPT1	chr1	40072906	40072907	3'UTR	T	C					82.8311	81.5025	0.936823	no	0.458065	0.464516	0.0444444	0.0444444
chr1_40072972_40072973_-_G_A	NM_000310.3(PPT1):c.*1088G>A	PPT1	chr1	40072972	40072973	3'UTR	G	A	35.4947	80.5165	0.135287	no	91.2028	81.9231	0.644387	no	0.406452	0.4	0.0814815	0.0888889
chr1_40300498_40300499_-_G_A	NM_001852.3(COL9A2):c.*683G>A	COL9A2	chr1	40300498	40300499	3'UTR	G	A					120.743	84.9846	0.266183	no	0.496774	0.490323	0.0814815	0.0814815
chr14_24080300_24080301_-_C_T	NM_006177.3(NRL):c.*935C>T	NRL	chr14	24080300	24080301	3'UTR	C	T					79.0961	58.7603	0.215731	no	0.625806	0.619355	0.0222222	0.0296296
chr14_24081127_24081128_-_C_T	NM_006177.3(NRL):c.*108C>T	NRL	chr14	24081127	24081128	3'UTR	C	T					91.2861	97.9422	0.838576	no	0.580645	0.574194	0.0444444	0.0444444
chr1_42733657_42733658_-_A_G	NM_148960.2(CLDN19):c.*1428A>G	CLDN19	chr1	42733657	42733658	3'UTR	A	G					79.378	72.8078	0.743288	no	0.529032	0.535484	0.0518519	0.0518519
chr14_30889800_30889801_-_A_T	NM_004086.2(COCH):c.*10T>A	COCH	chr14	30889800	30889801	3'UTR	A	T	19.147	28.4551	0.424812	no	96.3274	71.3272	0.347922	no	0.412903	0.412903	0.0518519	0.0592593
chr14_53949881_53949882_-_G_-	NM_001202.5(BMP4):c.*150delG	BMP4	chr14	53949881	53949882	3'UTR	G	-	22.1756	33.6017	0.124565	no	70.5448	62.9262	0.569233	no	0.354839	0.350649	0.0814815	0.0820896
chr14_53949883_53949883_-_-_AG	NM_001202.5(BMP4):c.*148_*149insAG	BMP4	chr14	53949883	53949883	3'UTR	-	AG	37.0629	32.8251	0.80563	no	61.9595	64.8771	0.789656	no	0.363636	0.365385	0.0820896	0.0808824
chr14_53949900_53949901_-_A_T	NM_001202.5(BMP4):c.*131A>T	BMP4	chr14	53949900	53949901	3'UTR	A	T					67.6386	70.5273	0.831684	no	0.393548	0.393548	0.0740741	0.0740741
chr14_54842543_54842544_-_A_G	NM_000161.2(GCH1):c.*1473A>G	GCH1	chr14	54842543	54842544	3'UTR	A	G	38.4523	55.5475	0.118144	no	91.5861	93.114	0.937666	no	0.43871	0.445161	0.0518519	0.0444444
chr14_54842759_54842760_-_C_T	NM_000161.2(GCH1):c.*1257C>T	GCH1	chr14	54842759	54842760	3'UTR	C	T	39.7613	30.9399	0.618009	no	76.9237	65.7684	0.449623	no	0.425806	0.419355	0.0592593	0.0592593
chr14_56805587_56805591_-_TTTG_-	NM_172337.2(OTX2):c.-135_-132delTTTG	OTX2	chr14	56805587	56805591	3'UTR	TTTG	-					83.8477	97.165	0.690382	no	0.537975	0.545455	0.0289855	0.0298507
chr14_60646121_60646122_-_C_A	NM_005982.3(SIX1):c.*161C>A	SIX1	chr14	60646121	60646122	3'UTR	C	A	13.7109	37.506	0.0178157	yes	75.2144	84.1977	0.691932	no	0.419355	0.412903	0.0444444	0.0518519
chr1_46188818_46188819_-_C_T	NM_017739.3(POMGNT1):c.*451C>T	POMGNT1	chr1	46188818	46188819	3'UTR	C	T					87.7325	56.6061	0.262348	no	0.6	0.593548	0.0296296	0.0296296
chr14_65076305_65076306_-_C_T	NM_002382.4(MAX):c.*170C>T	MAX	chr14	65076305	65076306	3'UTR	C	T	27.4756	15.4312	0.040517	no	88.366	78.1134	0.515943	no	0.406452	0.4	0.0740741	0.0740741
chr14_67747221_67747222_-_C_G	NM_015346.3(ZFYVE26):c.*1214C>G	ZFYVE26	chr14	67747221	67747222	3'UTR	C	G	20.4368	65.4229	0.0125934	yes	87.3436	78.5469	0.615393	no	0.451613	0.451613	0.0518519	0.0518519
chr14_74500140_74500141_-_G_A	NM_000428.2(LTBP2):c.*743G>A	LTBP2	chr14	74500140	74500141	3'UTR	G	A	106.917	38.1887	0.532535	no	46.2076	81.0594	0.0537265	no	0.483871	0.477419	0.0666667	0.0666667
chr14_77275006_77275007_-_A_AA	NM_013382.5(POMT2):c.*2369dupA	POMT2	chr14	77275006	77275007	3'UTR	A	AA					69.3269	56.6987	0.252734	no	0.393548	0.391026	0.0666667	0.0661765
chr14_77275796_77275797_-_C_A	NM_013382.5(POMT2):c.*1579C>A	POMT2	chr14	77275796	77275797	3'UTR	C	A					62.5266	79.2339	0.512153	no	0.509677	0.503226	0.0518519	0.0592593
chr14_77276753_77276754_-_C_G	NM_013382.5(POMT2):c.*622C>G	POMT2	chr14	77276753	77276754	3'UTR	C	G					54.0372	56.335	0.887479	no	0.625806	0.625806	0.0222222	0.0222222
chr14_77508887_77508888_-_A_G	NM_004863.3(SPTLC2):c.*3396A>G	SPTLC2	chr14	77508887	77508888	3'UTR	A	G	21.3362	24.2061	0.585402	no	61.5784	68.9403	0.512834	no	0.412903	0.419355	0.0740741	0.0740741
chr14_77510347_77510348_-_A_T	NM_004863.3(SPTLC2):c.*1936A>T	SPTLC2	chr14	77510347	77510348	3'UTR	A	T	72.4235	19.3128	0.0269593	yes	92.5466	85.5266	0.72727	no	0.380645	0.380645	0.0962963	0.0962963
chr14_77511130_77511131_-_T_A	NM_004863.3(SPTLC2):c.*1153T>A	SPTLC2	chr14	77511130	77511131	3'UTR	T	A					72.8533	84.3029	0.506265	no	0.412903	0.412903	0.0962963	0.0888889
chr14_92039956_92039957_-_G_C	NM_004239.4(TRIP11):c.-272G>C	TRIP11	chr14	92039956	92039957	3'UTR	G	C	393.931	32.4038	0.201663	no	75.1466	65.3389	0.55154	no	0.535484	0.535484	0.037037	0.037037
chr14_94377161_94377162_-_G_A	NM_000295.4(SERPINA1):c.*1287G>A	SERPINA1	chr14	94377161	94377162	3'UTR	G	A	17.4943	20.219	0.715748	no					0.432258	0.425806	0.0740741	0.0814815
chr14_95089049_95089050_-_T_-	NM_177438.2(DICER1):c.*1448delT	DICER1	chr14	95089049	95089050	3'UTR	T	-	23.6644	24.3645	0.946062	no	89.282	81.4039	0.679359	no	0.36129	0.363636	0.103704	0.104478
chr14_95089500_95089501_-_C_G	NM_177438.2(DICER1):c.*997C>G	DICER1	chr14	95089500	95089501	3'UTR	C	G	26.2597	29.8045	0.565416	no	70.6549	86.145	0.356089	no	0.387097	0.387097	0.103704	0.103704
chr14_95090493_95090494_-_C_T	NM_177438.2(DICER1):c.*4C>T	DICER1	chr14	95090493	95090494	3'UTR	C	T	36.869	26.6937	0.430859	no	73.5751	75.1598	0.913298	no	0.4	0.393548	0.0518519	0.0518519
chr15_34230360_34230361_-_C_G	NM_133647.1(SLC12A6):c.*3520C>G	SLC12A6	chr15	34230360	34230361	3'UTR	C	G	16.0214	9.95968	0.251226	no	74.3731	91.2063	0.259058	no	0.445161	0.445161	0.0962963	0.0962963
chr15_34231196_34231197_-_A_G	NM_133647.1(SLC12A6):c.*2684A>G	SLC12A6	chr15	34231196	34231197	3'UTR	A	G	35.7083	59.5453	0.543278	no	84.9671	64.7683	0.264954	no	0.490323	0.496774	0.0592593	0.0518519
chr15_34233054_34233055_-_C_T	NM_133647.1(SLC12A6):c.*826C>T	SLC12A6	chr15	34233054	34233055	3'UTR	C	T					45.9871	100.437	0.0394743	no	0.412903	0.406452	0.0814815	0.0888889
chr15_34341926_34341927_-_C_CC	NM_018648.3(NOP10):c.*41dupC	NOP10	chr15	34341926	34341927	3'UTR	C	CC	248.816	30.2755	0.0250817	yes	84.0117	71.5502	0.499314	no	0.529032	0.532051	0.0444444	0.0441176
chr15_34788119_34788120_-_C_T	NM_005159.4(ACTC1):c.*2292C>T	ACTC1	chr15	34788119	34788120	3'UTR	C	T					242.469	51.3342	0.000416772	yes	0.367742	0.36129	0.125926	0.133333
chr15_42723663_42723664_-_A_G	NM_138477.3(CDAN1):c.*827A>G	CDAN1	chr15	42723663	42723664	3'UTR	A	G					96.8533	44.1665	0.0237588	no	0.522581	0.529032	0.0592593	0.0518519
chr15_44562821_44562822_-_G_T	NM_025137.3(SPG11):c.*299G>T	SPG11	chr15	44562821	44562822	3'UTR	G	T					84.4151	144.029	0.0825489	no	0.380645	0.374194	0.0888889	0.0962963
chr15_48408729_48408730_-_C_A	NM_000138.4(FBN1):c.*2260C>A	FBN1	chr15	48408729	48408730	3'UTR	C	A	47.7817	30.3549	0.25578	no	97.7529	69.8706	0.119367	no	0.380645	0.374194	0.0592593	0.0592593
chr15_48409046_48409047_-_G_T	NM_000138.4(FBN1):c.*1943G>T	FBN1	chr15	48409046	48409047	3'UTR	G	T					86.8602	105.619	0.232475	no	0.4	0.393548	0.0962963	0.0962963
chr15_48409982_48409983_-_G_T	NM_000138.4(FBN1):c.*1007G>T	FBN1	chr15	48409982	48409983	3'UTR	G	T					60.1438	97.1399	0.153987	no	0.425806	0.419355	0.103704	0.103704
chr15_48410583_48410584_-_G_T	NM_000138.4(FBN1):c.*406G>T	FBN1	chr15	48410583	48410584	3'UTR	G	T	21.0953	19.7713	0.877736	no	87.7823	54.8334	0.0623867	no	0.36129	0.354839	0.118519	0.118519
chr1_54851288_54851289_-_C_T	NM_014762.3(DHCR24):c.*944C>T	DHCR24	chr1	54851288	54851289	3'UTR	C	T	17.2246	41.9984	0.191159	no					0.580645	0.574194	0.0222222	0.0296296
chr15_48737993_48737994_-_T_C	NM_014985.3(CEP152):c.*255T>C	CEP152	chr15	48737993	48737994	3'UTR	T	C					61.8148	79.2919	0.211091	no	0.354839	0.36129	0.118519	0.111111
chr15_51208615_51208616_-_T_C	NM_031226.2(CYP19A1):c.*2192T>C	CYP19A1	chr15	51208615	51208616	3'UTR	T	C	38.6883	36.7392	0.901849	no	78.6908	74.7364	0.810595	no	0.458065	0.464516	0.0888889	0.0814815
chr15_53514048_53514049_-_A_G	NM_182758.3(WDR72):c.*3650A>G	WDR72	chr15	53514048	53514049	3'UTR	A	G					86.0391	54.1728	0.0826417	no	0.458065	0.464516	0.0740741	0.0740741
chr15_53515087_53515087_-_-_CACACA	NM_182758.3(WDR72):c.*2611_*2612insCACACA	WDR72	chr15	53515087	53515087	3'UTR	-	CACACA					77.9723	74.0975	0.809651	no	0.331169	0.3375	0.179104	0.171429
chr15_53516115_53516116_-_T_C	NM_182758.3(WDR72):c.*1583T>C	WDR72	chr15	53516115	53516116	3'UTR	T	C					81.6871	95.1962	0.552951	no	0.348387	0.354839	0.0888889	0.0814815
chr15_53516189_53516190_-_G_C	NM_182758.3(WDR72):c.*1509G>C	WDR72	chr15	53516189	53516190	3'UTR	G	C					66.2407	63.2594	0.844708	no	0.329032	0.329032	0.103704	0.103704
chr15_53516480_53516481_-_T_A	NM_182758.3(WDR72):c.*1218T>A	WDR72	chr15	53516480	53516481	3'UTR	T	A					72.4761	98.2333	0.172532	no	0.335484	0.335484	0.133333	0.133333
chr15_53517242_53517247_-_ATTTG_-	NM_182758.3(WDR72):c.*452_*456delATTTG	WDR72	chr15	53517242	53517247	3'UTR	ATTTG	-					90.6491	67.7101	0.221978	no	0.345912	0.350649	0.115108	0.119403
chr15_55204033_55204034_-_T_C	NM_004580.4(RAB27A):c.*1473T>C	RAB27A	chr15	55204033	55204034	3'UTR	T	C					68.5149	68.0845	0.977507	no	0.393548	0.4	0.111111	0.103704
chr15_68207607_68207608_-_T_A	NM_017882.2(CLN6):c.*532T>A	CLN6	chr15	68207607	68207608	3'UTR	T	A	153.313	140.886	0.963617	no	80.4965	64.9071	0.158717	no	0.548387	0.548387	0.0444444	0.0444444
chr15_68207669_68207670_-_C_T	NM_017882.2(CLN6):c.*470C>T	CLN6	chr15	68207669	68207670	3'UTR	C	T	49.9563	28.4368	0.0464928	no	78.9556	90.1027	0.512071	no	0.548387	0.541935	0.0518519	0.0518519
chr15_68207960_68207961_-_G_C	NM_017882.2(CLN6):c.*179G>C	CLN6	chr15	68207960	68207961	3'UTR	G	C	28.4364	32.622	0.806785	no	68.659	62.3547	0.652576	no	0.470968	0.470968	0.0444444	0.0444444
chr15_68207964_68207965_-_C_T	NM_017882.2(CLN6):c.*175C>T	CLN6	chr15	68207964	68207965	3'UTR	C	T	51.1265	21.3347	0.105981	no	80.1072	82.5124	0.899452	no	0.477419	0.470968	0.0444444	0.0444444
chr15_68208070_68208071_-_G_T	NM_017882.2(CLN6):c.*69G>T	CLN6	chr15	68208070	68208071	3'UTR	G	T	7.65571	238.879	0.00537377	yes	109.019	74.6354	0.338235	no	0.612903	0.606452	0.037037	0.0444444
chr15_72376112_72376113_-_G_A	NM_000520.5(HEXA):c.-141G>A	HEXA	chr15	72376112	72376113	3'UTR	G	A	117.239	82.3273	0.865814	no					0.645161	0.63871	0.0222222	0.0222222
chr15_74179870_74179871_-_G_C	NM_022369.3(STRA6):c.*209G>C	STRA6	chr15	74179870	74179871	3'UTR	G	C	69.6862	43.9942	0.762038	no	84.5996	78.9162	0.843531	no	0.593548	0.593548	0.0296296	0.0296296
chr15_76216459_76216460_-_G_A	NM_000126.3(ETFA):c.*99G>A	ETFA	chr15	76216459	76216460	3'UTR	G	A	13.3104	9.15452	0.368068	no	83.2973	71.9621	0.607937	no	0.4	0.393548	0.0740741	0.0740741
chr1_58576090_58576091_-_G_A	NM_002353.2(TACSTD2):c.*94G>A	TACSTD2	chr1	58576090	58576091	3'UTR	G	A	25.0645	30.3766	0.774463	no	59.9355	76.931	0.203874	no	0.535484	0.529032	0.0296296	0.0296296
chr15_89316720_89316721_-_G_A	NM_002693.2(POLG):c.*30G>A	POLG	chr15	89316720	89316721	3'UTR	G	A					104.972	72.675	0.0337757	no	0.56129	0.554839	0.0296296	0.0296296
chr15_99972110_99972111_-_G_A	NM_139057.3(ADAMTS17):c.*2291G>A	ADAMTS17	chr15	99972110	99972111	3'UTR	G	A	84.8947	8.22602	0.0059966	yes	103.648	90.7432	0.685501	no	0.541935	0.535484	0.0666667	0.0666667
chr15_99972801_99972802_-_C_T	NM_139057.3(ADAMTS17):c.*1600C>T	ADAMTS17	chr15	99972801	99972802	3'UTR	C	T	25.9181	23.9059	0.933245	no	53.0537	83.2068	0.0668731	no	0.496774	0.490323	0.0740741	0.0740741
chr15_99973385_99973386_-_C_T	NM_139057.3(ADAMTS17):c.*1016C>T	ADAMTS17	chr15	99973385	99973386	3'UTR	C	T	12.7913	10.8691	0.662973	no					0.56129	0.554839	0.0518519	0.0518519
chr15_99973658_99973659_-_G_A	NM_139057.3(ADAMTS17):c.*743G>A	ADAMTS17	chr15	99973658	99973659	3'UTR	G	A	27.7345	35.9343	0.507818	no	75.0888	85.3372	0.640082	no	0.496774	0.490323	0.0444444	0.0444444
chr15_99973980_99973981_-_G_C	NM_139057.3(ADAMTS17):c.*421G>C	ADAMTS17	chr15	99973980	99973981	3'UTR	G	C	9.04016	82.6864	0.014727	yes	163.718	105.181	0.093702	no	0.554839	0.554839	0.0296296	0.0296296
chr16_1445227_1445228_-_A_C	NM_001287.5(CLCN7):c.*1403A>C	CLCN7	chr16	1445227	1445228	3'UTR	A	C	68.4947	17.6099	0.142138	no	104.452	137.593	0.553943	no	0.645161	0.651613	0.0148148	0.0148148
chr16_1445486_1445488_-_GG_GGGG	NM_001287.5(CLCN7):c.*1143_*1144dupGG	CLCN7	chr16	1445486	1445488	3'UTR	GG	GGGG	31.8437	70.5084	0.235327	no	84.8307	73.7256	0.431546	no	0.660256	0.664557	0.0294118	0.0289855
chr16_20333254_20333255_-_G_A	NM_003361.3(UMOD):c.*59G>A	UMOD	chr16	20333254	20333255	3'UTR	G	A					114.094	85.9185	0.408985	no	0.574194	0.567742	0.0148148	0.0148148
chr16_23388642_23388643_-_C_-	NM_153603.3(COG7):c.*277delC	COG7	chr16	23388642	23388643	3'UTR	C	-	8.6	11.7542	0.365958	no	64.8687	85.4363	0.179026	no	0.354839	0.350649	0.0666667	0.0746269
chr16_23522468_23522469_-_A_AA	NM_001083614.1(EARS2):c.*1902dupA	EARS2	chr16	23522468	23522469	3'UTR	A	AA					60.2141	63.3632	0.839232	no	0.445161	0.442308	0.0666667	0.0661765
chr16_28477460_28477461_-_C_A	NM_001042432.1(CLN3):c.*55C>A	CLN3	chr16	28477460	28477461	3'UTR	C	A					98.6087	63.7425	0.17698	no	0.612903	0.606452	0.0222222	0.0296296
chr16_3242060_3242061_-_A_G	NM_000243.2(MEFV):c.*1080A>G	MEFV	chr16	3242060	3242061	3'UTR	A	G	395.424	7.42335	0.00016828	yes					0.490323	0.496774	0.0444444	0.0444444
chr16_3242416_3242417_-_G_A	NM_000243.2(MEFV):c.*724G>A	MEFV	chr16	3242416	3242417	3'UTR	G	A					74.2158	83.3249	0.6458	no	0.509677	0.503226	0.0296296	0.0296296
chr16_3243066_3243067_-_C_T	NM_000243.2(MEFV):c.*74C>T	MEFV	chr16	3243066	3243067	3'UTR	C	T	112.699	31.7644	0.319479	no	78.9362	78.0915	0.956346	no	0.470968	0.464516	0.0740741	0.0740741
chr16_3582213_3582214_-_A_G	NM_032444.3(SLX4):c.*128A>G	SLX4	chr16	3582213	3582214	3'UTR	A	G	81.1774	85.1961	0.968611	no	95.529	63.8435	0.0444269	no	0.612903	0.619355	0.0148148	0.0148148
chr16_46659854_46659855_-_A_G	NM_018206.5(VPS35):c.*617A>G	VPS35	chr16	46659854	46659855	3'UTR	A	G					88.3243	71.5458	0.348182	no	0.4	0.406452	0.0962963	0.0888889
chr1_6466797_6466798_-_T_-	NM_020631.4(PLEKHG5):c.*765delT	PLEKHG5	chr1	6466797	6466798	3'UTR	T	-	90.8615	134.618	0.743974	no	68.6986	66.2179	0.837105	no	0.503226	0.506494	0.037037	0.0373134
chr1_6466812_6466813_-_C_-	NM_020631.4(PLEKHG5):c.*750delC	PLEKHG5	chr1	6466812	6466813	3'UTR	C	-					70.9327	77.8642	0.592221	no	0.516129	0.512987	0.037037	0.0373134
chr16_4797189_4797190_-_T_C	NM_024589.2(ROGDI):c.*270T>C	ROGDI	chr16	4797189	4797190	3'UTR	T	C					90.3132	93.1207	0.913632	no	0.625806	0.632258	0.0148148	0.0148148
chr16_51136078_51136079_-_G_GG	NM_002968.2(SALL1):c.*1033dupG	SALL1	chr16	51136078	51136079	3'UTR	G	GG					73.2835	64.8045	0.554182	no	0.380645	0.384615	0.0814815	0.0808824
chr16_53600766_53600767_-_C_A	NM_015272.4(RPGRIP1L):c.*1309C>A	RPGRIP1L	chr16	53600766	53600767	3'UTR	C	A	22.5236	7.21404	0.000495035	yes	83.4153	54.8013	0.0236152	no	0.419355	0.412903	0.0666667	0.0666667
chr16_53601569_53601570_-_T_G	NM_015272.4(RPGRIP1L):c.*506T>G	RPGRIP1L	chr16	53601569	53601570	3'UTR	T	G					78.5685	65.3149	0.38221	no	0.335484	0.341935	0.125926	0.118519
chr16_56484669_56484670_-_C_T	NM_031885.3(BBS2):c.*91C>T	BBS2	chr16	56484669	56484670	3'UTR	C	T	25.5004	13.6616	0.258892	no	68.228	57.8552	0.518967	no	0.425806	0.419355	0.0666667	0.0666667
chr16_66510564_66510565_-_A_G	NM_004614.4(TK2):c.*1403A>G	TK2	chr16	66510564	66510565	3'UTR	A	G	16.8277	65.5271	0.260189	no	77.217	88.4763	0.534507	no	0.6	0.606452	0.037037	0.037037
chr16_66510634_66510635_-_G_T	NM_004614.4(TK2):c.*1333G>T	TK2	chr16	66510634	66510635	3'UTR	G	T					77.0636	67.7523	0.650354	no	0.548387	0.541935	0.0444444	0.0518519
chr16_71566867_71566868_-_T_-	NM_000353.2(TAT):c.*1276delT	TAT	chr16	71566867	71566868	3'UTR	T	-					76.4158	68.2698	0.583072	no	0.283871	0.285714	0.111111	0.11194
chr16_74713001_74713002_-_A_G	NM_024306.4(FA2H):c.*1188A>G	FA2H	chr16	74713001	74713002	3'UTR	A	G					76.5419	80.9348	0.773801	no	0.322581	0.329032	0.0962963	0.0888889
chr16_75473760_75473761_-_G_A	NM_021615.4(CHST6):c.*4880G>A	CHST6	chr16	75473760	75473761	3'UTR	G	A	11.8084	27.7824	0.259985	no	87.8628	70.1249	0.388917	no	0.406452	0.4	0.0888889	0.0888889
chr16_75474267_75474268_-_T_TT	NM_021615.4(CHST6):c.*4373dupT	CHST6	chr16	75474267	75474268	3'UTR	T	TT					58.1427	74.2457	0.356338	no	0.412903	0.410256	0.0740741	0.0735294
chr16_75474485_75474486_-_C_T	NM_021615.4(CHST6):c.*4155C>T	CHST6	chr16	75474485	75474486	3'UTR	C	T					61.189	96.6878	0.121585	no	0.490323	0.483871	0.0518519	0.0518519
chr16_75477166_75477167_-_C_G	NM_021615.4(CHST6):c.*1474C>G	CHST6	chr16	75477166	75477167	3'UTR	C	G					73.3835	77.5967	0.834135	no	0.412903	0.412903	0.0814815	0.0814815
chr16_75478398_75478399_-_T_C	NM_021615.4(CHST6):c.*242T>C	CHST6	chr16	75478398	75478399	3'UTR	T	C	21.2836	87.5273	0.0268931	yes	79.0374	96.3404	0.410723	no	0.554839	0.56129	0.0222222	0.0222222
chr16_75478399_75478400_-_C_T	NM_021615.4(CHST6):c.*241C>T	CHST6	chr16	75478399	75478400	3'UTR	C	T					80.3596	134.459	0.0601104	no	0.554839	0.548387	0.0222222	0.0222222
chr16_84177883_84177887_-_AGAC_-	NM_178452.5(DNAAF1):c.*43_*46delGTCT	DNAAF1	chr16	84177883	84177887	3'UTR	AGAC	-					55.2723	74.002	0.12599	no	0.443038	0.441558	0.0942029	0.0970149
chr16_88813828_88813829_-_G_T	NM_000512.4(GALNS):c.*610G>T	GALNS	chr16	88813828	88813829	3'UTR	G	T					64.2291	72.7565	0.64458	no	0.477419	0.470968	0.0740741	0.0814815
chr16_88814202_88814203_-_C_T	NM_000512.4(GALNS):c.*236C>T	GALNS	chr16	88814202	88814203	3'UTR	C	T					55.5595	77.5522	0.0749913	no	0.619355	0.612903	0.0222222	0.0222222
chr16_89738283_89738284_-_G_A	NM_000135.2(FANCA):c.*317G>A	FANCA	chr16	89738283	89738284	3'UTR	G	A	9.94497	267.519	2.96679e-05	yes	64.0969	109.805	0.105027	no	0.619355	0.612903	0.0222222	0.0222222
chr16_9753941_9753942_-_G_A	NM_000833.4(GRIN2A):c.*9207G>A	GRIN2A	chr16	9753941	9753942	3'UTR	G	A	11.822	10.1233	0.79503	no	86.9924	83.5648	0.88349	no	0.445161	0.43871	0.0666667	0.0740741
chr16_9755769_9755770_-_A_G	NM_000833.4(GRIN2A):c.*7379A>G	GRIN2A	chr16	9755769	9755770	3'UTR	A	G					79.7039	56.228	0.132458	no	0.477419	0.483871	0.0888889	0.0888889
chr16_9761716_9761717_-_T_-	NM_000833.4(GRIN2A):c.*1432delT	GRIN2A	chr16	9761716	9761717	3'UTR	T	-	20.2936	41.0925	0.0352417	yes	69.9903	79.1	0.564569	no	0.425806	0.428571	0.0814815	0.0820896
chr16_9762090_9762091_-_T_A	NM_000833.4(GRIN2A):c.*1058T>A	GRIN2A	chr16	9762090	9762091	3'UTR	T	A	41.2307	9.22424	0.00147214	yes	85.6418	72.2158	0.429063	no	0.483871	0.483871	0.0666667	0.0666667
chr16_9762880_9762881_-_G_A	NM_000833.4(GRIN2A):c.*268G>A	GRIN2A	chr16	9762880	9762881	3'UTR	G	A					81.0953	77.5136	0.861403	no	0.464516	0.458065	0.0814815	0.0814815
chr17_10390381_10390382_-_T_C	NM_002472.2(MYH8):c.*72T>C	MYH8	chr17	10390381	10390382	3'UTR	T	C					78.8626	75.3848	0.864502	no	0.374194	0.380645	0.0962963	0.0962963
chr17_10680524_10680525_-_A_G	NM_004589.3(SCO1):c.*594A>G	SCO1	chr17	10680524	10680525	3'UTR	A	G	16.0093	17.5194	0.781223	no	77.8024	88.5082	0.612471	no	0.367742	0.374194	0.0814815	0.0814815
chr17_10680833_10680834_-_C_T	NM_004589.3(SCO1):c.*285C>T	SCO1	chr17	10680833	10680834	3'UTR	C	T	20.4643	29.6115	0.673349	no	103.804	78.967	0.380401	no	0.593548	0.587097	0.0148148	0.0148148
chr17_15265341_15265342_-_C_T	NM_000304.3(PMP22):c.-223C>T	PMP22	chr17	15265341	15265342	3'UTR	C	T	96.6843	25.6159	0.220202	no	87.588	99.0743	0.582568	no	0.567742	0.56129	0.037037	0.037037
chr17_17212687_17212688_-_T_C	NM_144997.5(FLCN):c.*967T>C	FLCN	chr17	17212687	17212688	3'UTR	T	C	37.8427	29.1534	0.518531	no	63.4266	84.4395	0.347905	no	0.554839	0.56129	0.0444444	0.0444444
chr17_28396452_28396453_-_A_G	NM_080669.5(SLC46A1):c.*3203A>G	SLC46A1	chr17	28396452	28396453	3'UTR	A	G					63.3554	87.2792	0.144606	no	0.587097	0.593548	0.0296296	0.0296296
chr17_28399565_28399566_-_G_A	NM_080669.5(SLC46A1):c.*90G>A	SLC46A1	chr17	28399565	28399566	3'UTR	G	A					104.494	85.2667	0.265802	no	0.541935	0.535484	0.0296296	0.0296296
chr17_28546911_28546912_-_T_C	NM_005148.3(UNC119):c.*385T>C	UNC119	chr17	28546911	28546912	3'UTR	T	C					83.0835	68.507	0.333336	no	0.541935	0.548387	0.0518519	0.0444444
chr17_30197858_30197859_-_C_G	NM_001045.5(SLC6A4):c.*597C>G	SLC6A4	chr17	30197858	30197859	3'UTR	C	G					80.955	68.6263	0.528083	no	0.393548	0.393548	0.0962963	0.0962963
chr17_30198048_30198049_-_G_A	NM_001045.5(SLC6A4):c.*407G>A	SLC6A4	chr17	30198048	30198049	3'UTR	G	A	23.1274	18.1756	0.603259	no	77.4562	87.6334	0.60322	no	0.425806	0.419355	0.118519	0.118519
chr17_30198358_30198359_-_G_C	NM_001045.5(SLC6A4):c.*97G>C	SLC6A4	chr17	30198358	30198359	3'UTR	G	C					84.5698	103.841	0.472429	no	0.56129	0.56129	0.0222222	0.0222222
chr17_3512698_3512699_-_G_A	NM_145068.3(TRPV3):c.*1218G>A	TRPV3	chr17	3512698	3512699	3'UTR	G	A	49.6382	163.995	0.257786	no	82.4731	83.311	0.96115	no	0.509677	0.503226	0.0296296	0.0296296
chr17_41754607_41754608_-_C_T	NM_002230.2(JUP):c.*1136C>T	JUP	chr17	41754607	41754608	3'UTR	C	T					52.3576	81.0401	0.0975849	no	0.419355	0.412903	0.0814815	0.0814815
chr17_42313894_42313895_-_C_T	NM_139276.2(STAT3):c.*1850C>T	STAT3	chr17	42313894	42313895	3'UTR	C	T					59.5411	76.5251	0.384389	no	0.490323	0.483871	0.0444444	0.0444444
chr17_44248861_44248862_-_A_C	NM_000342.3(SLC4A1):c.*1596A>C	SLC4A1	chr17	44248861	44248862	3'UTR	A	C	48.8456	120.371	0.636666	no	99.2404	88.6246	0.690285	no	0.477419	0.483871	0.0148148	0.0148148
chr17_44249184_44249185_-_G_-	NM_000342.3(SLC4A1):c.*1273delG	SLC4A1	chr17	44249184	44249185	3'UTR	G	-	49.7379	87.1676	0.177978	no	74.1863	77.4242	0.835039	no	0.490323	0.487013	0.037037	0.0373134
chr17_46030125_46030126_-_A_C	NM_001193466.1(KANSL1):c.*1350A>C	KANSL1	chr17	46030125	46030126	3'UTR	A	C	20.4902	23.8036	0.618435	no	78.9263	74.2053	0.77467	no	0.341935	0.348387	0.0592593	0.0592593
chr17_46030169_46030170_-_C_G	NM_001193466.1(KANSL1):c.*1306C>G	KANSL1	chr17	46030169	46030170	3'UTR	C	G	13.8198	35.5251	0.0959774	no	71.1332	85.5992	0.257545	no	0.329032	0.329032	0.0814815	0.0814815
chr17_46030659_46030660_-_C_T	NM_001193466.1(KANSL1):c.*816C>T	KANSL1	chr17	46030659	46030660	3'UTR	C	T	22.809	46.022	0.254211	no	82.428	72.6515	0.510283	no	0.496774	0.490323	0.0666667	0.0666667
chr17_46030838_46030839_-_T_G	NM_001193466.1(KANSL1):c.*637T>G	KANSL1	chr17	46030838	46030839	3'UTR	T	G	114.935	37.4882	0.281283	no	81.2703	67.6352	0.37811	no	0.490323	0.496774	0.0296296	0.0296296
chr17_4897833_4897834_-_C_T	NM_000080.3(CHRNE):c.*902C>T	CHRNE	chr17	4897833	4897834	3'UTR	C	T	14.691	35.9785	0.0515557	yes					0.580645	0.574194	0.0296296	0.0296296
chr17_4897859_4897860_-_G_A	NM_000080.3(CHRNE):c.*876G>A	CHRNE	chr17	4897859	4897860	3'UTR	G	A	54.106	52.3627	0.918102	no	97.1138	62.4385	0.0285871	no	0.632258	0.625806	0.0222222	0.0222222
chr17_4898352_4898353_-_G_A	NM_000080.3(CHRNE):c.*383G>A	CHRNE	chr17	4898352	4898353	3'UTR	G	A					79.2769	84.3386	0.813482	no	0.541935	0.535484	0.0518519	0.0518519
chr17_49990188_49990189_-_T_G	NM_005220.2(DLX3):c.*1328T>G	DLX3	chr17	49990188	49990189	3'UTR	T	G	42.6936	150.139	0.109237	no	73.5773	81.2032	0.625857	no	0.554839	0.56129	0.0296296	0.0296296
chr17_49991257_49991258_-_C_A	NM_005220.2(DLX3):c.*259C>A	DLX3	chr17	49991257	49991258	3'UTR	C	A					97.3531	71.1441	0.109947	no	0.567742	0.56129	0.0444444	0.0444444
chr17_50184472_50184474_-_TG_-	NM_000088.3(COL1A1):c.*1028_*1029delTG	COL1A1	chr17	50184472	50184474	3'UTR	TG	-					59.6119	81.1487	0.057702	no	0.365385	0.363636	0.0588235	0.0597015
chr17_50184520_50184521_-_G_C	NM_000088.3(COL1A1):c.*981G>C	COL1A1	chr17	50184520	50184521	3'UTR	G	C					80.4147	64.4577	0.282667	no	0.4	0.4	0.0518519	0.0518519
chr17_58998754_58998755_-_T_C	NM_015294.4(TRIM37):c.*622T>C	TRIM37	chr17	58998754	58998755	3'UTR	T	C					65.8422	87.2515	0.221378	no	0.412903	0.419355	0.0740741	0.0740741
chr17_61680480_61680485_-_AAAAA_AAAAAAAAAA	NM_032043.2(BRIP1):c.*2811_*2815dupAAAAA	BRIP1	chr17	61680480	61680485	3'UTR	AAAAA	AAAAAAAAAA					73.7545	63.2414	0.439042	no	0.427673	0.414634	0.0719424	0.0694444
chr17_61680603_61680604_-_A_G	NM_032043.2(BRIP1):c.*2692A>G	BRIP1	chr17	61680603	61680604	3'UTR	A	G					95.2308	70.1788	0.280447	no	0.567742	0.574194	0.0518519	0.0518519
chr17_63938559_63938560_-_C_T	NM_000334.4(SCN4A):c.*2211C>T	SCN4A	chr17	63938559	63938560	3'UTR	C	T	12.0579	35.1565	0.166008	no	154.132	93.3454	0.219682	no	0.593548	0.587097	0.037037	0.037037
chr17_63939701_63939702_-_G_A	NM_000334.4(SCN4A):c.*1069G>A	SCN4A	chr17	63939701	63939702	3'UTR	G	A	9.64586	13.7218	0.463045	no	47.0348	69.0819	0.104341	no	0.529032	0.522581	0.0444444	0.0444444
chr17_6425309_6425309_-_-_CAA	NM_014336.4(AIPL1):c.*150_*151insCAA	AIPL1	chr17	6425309	6425309	3'UTR	-	CAA	143.486	45.5142	0.296352	no	78.7215	54.4531	0.0740104	no	0.37013	0.369427	0.0746269	0.0729927
chr17_6451884_6451886_-_CG_-	NM_031220.3(PITPNM3):c.*3452_*3453delCG	PITPNM3	chr17	6451884	6451886	3'UTR	CG	-	70.8026	51.6867	0.655356	no	78.7212	60.056	0.22245	no	0.608974	0.603896	0.0294118	0.0298507
chr17_65529599_65529600_-_A_G	NM_004655.3(AXIN2):c.*376A>G	AXIN2	chr17	65529599	65529600	3'UTR	A	G	20.2737	15.0481	0.474722	no	77.2057	86.7786	0.646134	no	0.419355	0.425806	0.103704	0.0962963
chr17_74917793_74917794_-_G_T	NM_173477.4(USH1G):c.*279G>T	USH1G	chr17	74917793	74917794	3'UTR	G	T					100.603	102.647	0.932342	no	0.593548	0.587097	0.0296296	0.0296296
chr17_75273337_75273338_-_G_C	NM_021734.4(SLC25A19):c.*113G>C	SLC25A19	chr17	75273337	75273338	3'UTR	G	C	12.3346	10.0078	0.75738	no	110.718	59.7269	0.030093	no	0.632258	0.632258	0.0222222	0.0222222
chr17_75827900_75827901_-_C_T	NM_199242.2(UNC13D):c.*64C>T	UNC13D	chr17	75827900	75827901	3'UTR	C	T	29.5281	56.8213	0.418987	no	78.2622	101.162	0.158352	no	0.651613	0.645161	0.0296296	0.0296296
chr17_75943216_75943219_-_TTT_TTTTTT	NM_004035.6(ACOX1):c.*3529_*3531dupTTT	ACOX1	chr17	75943216	75943219	3'UTR	TTT	TTTTTT					46.8907	60.4408	0.193478	no	0.464968	0.45625	0.0364964	0.0357143
chr17_75944770_75944771_-_C_T	NM_004035.6(ACOX1):c.*1977C>T	ACOX1	chr17	75944770	75944771	3'UTR	C	T	12.4906	70.6403	4.58341e-05	yes	73.5351	45.9428	0.0655259	no	0.464516	0.458065	0.0592593	0.0592593
chr17_75946027_75946028_-_C_T	NM_004035.6(ACOX1):c.*720C>T	ACOX1	chr17	75946027	75946028	3'UTR	C	T	70.3638	23.0649	0.00513655	yes	81.3394	73.9838	0.679809	no	0.458065	0.451613	0.0666667	0.0740741
chr17_75946306_75946307_-_G_A	NM_004035.6(ACOX1):c.*441G>A	ACOX1	chr17	75946306	75946307	3'UTR	G	A	88.1804	26.4413	0.174192	no	64.1906	123.457	0.00661008	no	0.509677	0.503226	0.0518519	0.0592593
chr17_7668448_7668449_-_T_G	NM_000546.5(TP53):c.*1160T>G	TP53	chr17	7668448	7668449	3'UTR	T	G	24.4752	48.5606	0.0960373	no	53.7006	63.6695	0.176117	no	0.458065	0.464516	0.0666667	0.0666667
chr17_7668631_7668632_-_G_C	NM_000546.5(TP53):c.*977G>C	TP53	chr17	7668631	7668632	3'UTR	G	C					94.5951	70.2279	0.210456	no	0.56129	0.56129	0.0222222	0.0222222
chr17_7669262_7669263_-_G_T	NM_000546.5(TP53):c.*346G>T	TP53	chr17	7669262	7669263	3'UTR	G	T					83.2928	49.2926	0.0390953	no	0.490323	0.483871	0.0666667	0.0666667
chr17_7669281_7669282_-_C_T	NM_000546.5(TP53):c.*327C>T	TP53	chr17	7669281	7669282	3'UTR	C	T					68.0651	78.7111	0.598318	no	0.490323	0.483871	0.0740741	0.0740741
chr1_77888617_77888618_-_T_C	NM_144573.3(NEXN):c.-194A>G	NEXN	chr1	77888617	77888618	3'UTR	T	C	77.332	9.46456	0.000676764	yes	81.5893	77.0277	0.858723	no	0.632258	0.63871	0.0296296	0.0296296
chr1_77888683_77888684_-_T_C	NM_144573.3(NEXN):c.-128A>G	NEXN	chr1	77888683	77888684	3'UTR	T	C					92.1466	68.3598	0.294216	no	0.632258	0.63871	0.037037	0.0296296
chr17_78992070_78992071_-_C_A	NM_138793.3(CANT1):c.*1479C>A	CANT1	chr17	78992070	78992071	3'UTR	C	A					144.625	85.9208	0.0698792	no	0.56129	0.554839	0.0222222	0.0222222
chr17_78992284_78992286_-_GG_GGGG	NM_138793.3(CANT1):c.*1264_*1265dupGG	CANT1	chr17	78992284	78992286	3'UTR	GG	GGGG	60.4516	16.6025	0.0141707	yes	93.1282	86.5241	0.779578	no	0.673077	0.677215	0.0220588	0.0217391
chr17_78992551_78992552_-_G_C	NM_138793.3(CANT1):c.*998G>C	CANT1	chr17	78992551	78992552	3'UTR	G	C	77.7343	60.929	0.469647	no	84.3539	87.4068	0.873016	no	0.503226	0.503226	0.037037	0.037037
chr17_78992673_78992674_-_G_A	NM_138793.3(CANT1):c.*876G>A	CANT1	chr17	78992673	78992674	3'UTR	G	A	14.7339	24.2573	0.346033	no	76.8083	78.1128	0.940898	no	0.464516	0.458065	0.037037	0.037037
chr17_80209353_80209354_-_G_A	NM_000199.3(SGSH):c.*1098G>A	SGSH	chr17	80209353	80209354	3'UTR	G	A	54.8335	46.7439	0.76343	no	103.194	72.9738	0.0925012	no	0.509677	0.503226	0.0888889	0.0888889
chr17_80209950_80209951_-_C_T	NM_000199.3(SGSH):c.*501C>T	SGSH	chr17	80209950	80209951	3'UTR	C	T	45.4905	52.4248	0.781777	no	100.468	75.5536	0.22681	no	0.63871	0.632258	0.037037	0.037037
chr17_8096112_8096113_-_T_G	NM_021628.2(ALOXE3):c.*514T>G	ALOXE3	chr17	8096112	8096113	3'UTR	T	G					58.2988	94.8591	0.0943265	no	0.567742	0.574194	0.0444444	0.0444444
chr17_81932736_81932737_-_C_T	NM_006907.3(PYCR1):c.*477C>T	PYCR1	chr17	81932736	81932737	3'UTR	C	T					119.618	78.8564	0.26111	no	0.593548	0.587097	0.0148148	0.0148148
chr17_8226064_8226065_-_C_G	NM_025099.5(CTC1):c.*2115C>G	CTC1	chr17	8226064	8226065	3'UTR	C	G	65.7104	70.0954	0.929292	no	91.7247	85.4169	0.747297	no	0.516129	0.516129	0.0592593	0.0592593
chr17_8226335_8226336_-_G_A	NM_025099.5(CTC1):c.*1844G>A	CTC1	chr17	8226335	8226336	3'UTR	G	A	25.4297	19.8864	0.565639	no	69.7653	79.3612	0.55972	no	0.483871	0.477419	0.0740741	0.0814815
chr17_8227049_8227050_-_G_C	NM_025099.5(CTC1):c.*1130G>C	CTC1	chr17	8227049	8227050	3'UTR	G	C	16.6455	18.3985	0.880519	no					0.522581	0.522581	0.0962963	0.0962963
chr17_8227354_8227355_-_C_T	NM_025099.5(CTC1):c.*825C>T	CTC1	chr17	8227354	8227355	3'UTR	C	T	19.055	38.4874	0.453054	no	70.3961	68.4768	0.941088	no	0.490323	0.483871	0.0666667	0.0666667
chr17_8228115_8228116_-_T_G	NM_025099.5(CTC1):c.*64T>G	CTC1	chr17	8228115	8228116	3'UTR	T	G	34.5726	205.061	0.281537	no	93.8665	80.4887	0.501104	no	0.516129	0.522581	0.037037	0.037037
chr18_13883058_13883059_-_G_T	NM_000529.2(MC2R):c.*1566G>T	MC2R	chr18	13883058	13883059	3'UTR	G	T	34.2006	53.0104	0.691583	no	74.9741	78.605	0.841791	no	0.516129	0.509677	0.0296296	0.0296296
chr18_13884154_13884155_-_G_A	NM_000529.2(MC2R):c.*470G>A	MC2R	chr18	13884154	13884155	3'UTR	G	A					151.597	61.2812	0.00116908	yes	0.496774	0.490323	0.0592593	0.0666667
chr18_23531852_23531853_-_G_A	NM_000271.4(NPC1):c.*349G>A	NPC1	chr18	23531852	23531853	3'UTR	G	A	56.2102	29.0329	0.105201	no	68.2779	88.5755	0.213688	no	0.458065	0.451613	0.0740741	0.0740741
chr18_2917399_2917403_-_TTTC_TTTCTTTC	NM_014646.2(LPIN2):c.*2890_*2893dupTTTC	LPIN2	chr18	2917399	2917403	3'UTR	TTTC	TTTCTTTC	43.5564	94.5297	0.569018	no	67.3433	80.6589	0.367212	no	0.468354	0.462963	0.0362319	0.0352113
chr18_2919166_2919167_-_G_A	NM_014646.2(LPIN2):c.*1126G>A	LPIN2	chr18	2919166	2919167	3'UTR	G	A	50.7528	30.7541	0.443396	no	78.907	80.7409	0.899749	no	0.541935	0.535484	0.0740741	0.0740741
chr18_2919266_2919267_-_C_T	NM_014646.2(LPIN2):c.*1026C>T	LPIN2	chr18	2919266	2919267	3'UTR	C	T	119.919	46.4097	0.0962756	no	70.6821	107.647	0.0570125	no	0.587097	0.580645	0.0296296	0.0296296
chr18_2919271_2919272_-_G_A	NM_014646.2(LPIN2):c.*1021G>A	LPIN2	chr18	2919271	2919272	3'UTR	G	A	57.8187	50.7547	0.844876	no	92.6588	81.8229	0.616847	no	0.56129	0.554839	0.037037	0.037037
chr18_31066386_31066387_-_T_G	NM_024422.4(DSC2):c.*1628T>G	DSC2	chr18	31066386	31066387	3'UTR	T	G					82.6329	78.5361	0.746391	no	0.316129	0.322581	0.133333	0.125926
chr18_46477398_46477399_-_A_T	NM_144612.6(LOXHD1):c.*73A>T	LOXHD1	chr18	46477398	46477399	3'UTR	A	T	12.3878	23.7679	0.0533557	no	70.4322	84.2604	0.375993	no	0.554839	0.554839	0.0296296	0.0296296
chr18_49823155_49823156_-_T_C	NM_001080467.2(MYO5B):c.*3315T>C	MYO5B	chr18	49823155	49823156	3'UTR	T	C					70.9524	76.6493	0.789267	no	0.354839	0.36129	0.0740741	0.0666667
chr18_49823470_49823471_-_C_T	NM_001080467.2(MYO5B):c.*3000C>T	MYO5B	chr18	49823470	49823471	3'UTR	C	T	10.6057	13.3975	0.353059	no	74.3001	78.3408	0.784852	no	0.36129	0.354839	0.111111	0.118519
chr18_49823496_49823497_-_A_G	NM_001080467.2(MYO5B):c.*2974A>G	MYO5B	chr18	49823496	49823497	3'UTR	A	G					71.0496	61.6226	0.546376	no	0.341935	0.348387	0.103704	0.103704
chr18_49825123_49825124_-_A_AA	NM_001080467.2(MYO5B):c.*1347dupA	MYO5B	chr18	49825123	49825124	3'UTR	A	AA	11.2869	26.6605	0.011833	yes	83.3521	74.5262	0.582761	no	0.367742	0.365385	0.0814815	0.0808824
chr18_49825328_49825329_-_A_C	NM_001080467.2(MYO5B):c.*1142A>C	MYO5B	chr18	49825328	49825329	3'UTR	A	C					94.1243	66.9619	0.0476087	no	0.341935	0.348387	0.0962963	0.0888889
chr18_49826006_49826007_-_G_A	NM_001080467.2(MYO5B):c.*464G>A	MYO5B	chr18	49826006	49826007	3'UTR	G	A	18.7397	19.2661	0.930383	no	66.8597	70.1049	0.838396	no	0.4	0.393548	0.0888889	0.0962963
chr18_55222715_55222716_-_A_G	NM_001083962.1(TCF4):c.*5319A>G	TCF4	chr18	55222715	55222716	3'UTR	A	G	31.3669	117.236	0.0472423	yes	84.3752	83.6063	0.950477	no	0.4	0.406452	0.0888889	0.0888889
chr18_55223681_55223682_-_A_-	NM_001083962.1(TCF4):c.*4353delA	TCF4	chr18	55223681	55223682	3'UTR	A	-					74.3279	67.0998	0.421781	no	0.329032	0.331169	0.0444444	0.0447761
chr18_55224052_55224053_-_A_AA	NM_001083962.1(TCF4):c.*3982dupA	TCF4	chr18	55224052	55224053	3'UTR	A	AA					92.6489	70.042	0.173	no	0.341935	0.339744	0.125926	0.125
chr18_55224278_55224279_-_A_G	NM_001083962.1(TCF4):c.*3756A>G	TCF4	chr18	55224278	55224279	3'UTR	A	G	34.2178	17.5514	0.0874458	no	88.8687	84.249	0.825827	no	0.425806	0.432258	0.0740741	0.0740741
chr18_55224505_55224506_-_T_A	NM_001083962.1(TCF4):c.*3529T>A	TCF4	chr18	55224505	55224506	3'UTR	T	A	122.56	56.8453	0.676159	no	70.1581	86.5061	0.388359	no	0.419355	0.419355	0.037037	0.037037
chr18_55226122_55226123_-_A_G	NM_001083962.1(TCF4):c.*1912A>G	TCF4	chr18	55226122	55226123	3'UTR	A	G					88.3648	79.4907	0.556364	no	0.322581	0.329032	0.133333	0.125926
chr18_55227678_55227679_-_A_G	NM_001083962.1(TCF4):c.*356A>G	TCF4	chr18	55227678	55227679	3'UTR	A	G					79.0916	65.6986	0.465551	no	0.303226	0.309677	0.0814815	0.0814815
chr18_57545362_57545363_-_C_T	NM_000140.3(FECH):c.*5349C>T	FECH	chr18	57545362	57545363	3'UTR	C	T					85.4961	72.0812	0.566367	no	0.406452	0.4	0.0962963	0.0962963
chr18_57548632_57548633_-_C_T	NM_000140.3(FECH):c.*2079C>T	FECH	chr18	57548632	57548633	3'UTR	C	T					88.2382	50.7058	0.0597556	no	0.432258	0.425806	0.0814815	0.0888889
chr18_57647841_57647842_-_G_C	NM_005603.4(ATP8B1):c.*646G>C	ATP8B1	chr18	57647841	57647842	3'UTR	G	C	12.0816	23.0714	0.0224386	no	76.9195	63.4681	0.511825	no	0.503226	0.503226	0.0444444	0.0444444
chr18_59330153_59330154_-_C_T	NM_005570.3(LMAN1):c.*939C>T	LMAN1	chr18	59330153	59330154	3'UTR	C	T	28.8338	13.8811	0.0101884	yes	84.5283	78.0268	0.714594	no	0.43871	0.432258	0.0888889	0.0962963
chr18_59431192_59431193_-_T_G	NM_133459.3(CCBE1):c.*4715T>G	CCBE1	chr18	59431192	59431193	3'UTR	T	G					126.21	88.9727	0.334606	no	0.458065	0.464516	0.0740741	0.0740741
chr18_59432764_59432765_-_T_C	NM_133459.3(CCBE1):c.*3143T>C	CCBE1	chr18	59432764	59432765	3'UTR	T	C					66.2582	86.2772	0.280654	no	0.374194	0.380645	0.111111	0.111111
chr18_59434170_59434171_-_C_T	NM_133459.3(CCBE1):c.*1737C>T	CCBE1	chr18	59434170	59434171	3'UTR	C	T	14.7653	28.7481	0.276745	no					0.548387	0.541935	0.0444444	0.0444444
chr18_59434656_59434657_-_G_A	NM_133459.3(CCBE1):c.*1251G>A	CCBE1	chr18	59434656	59434657	3'UTR	G	A	34.5702	16.6084	0.0906113	no	91.1821	88.5695	0.888507	no	0.387097	0.380645	0.0666667	0.0666667
chr18_59434746_59434747_-_A_AA	NM_133459.3(CCBE1):c.*1161dupA	CCBE1	chr18	59434746	59434747	3'UTR	A	AA	22.9671	16.971	0.314385	no	72.6062	66.0369	0.588244	no	0.36129	0.358974	0.0740741	0.0735294
chr18_59435601_59435601_-_-_AAAT	NM_133459.3(CCBE1):c.*306_*307insAAAT	CCBE1	chr18	59435601	59435601	3'UTR	-	AAAT	27.0517	24.015	0.742795	no	90.5769	89.6756	0.965835	no	0.376623	0.367089	0.0820896	0.0869565
chr19_10133648_10133649_-_C_A	NM_001130823.2(DNMT1):c.*18C>A	DNMT1	chr19	10133648	10133649	3'UTR	C	A					61.4805	69.6645	0.583864	no	0.509677	0.503226	0.0296296	0.0296296
chr19_17824990_17824991_-_A_G	NM_000215.3(JAK3):c.*1752A>G	JAK3	chr19	17824990	17824991	3'UTR	A	G					79.2895	86.2273	0.537323	no	0.496774	0.503226	0.0666667	0.0592593
chr19_17825211_17825212_-_T_C	NM_000215.3(JAK3):c.*1531T>C	JAK3	chr19	17825211	17825212	3'UTR	T	C	15.4818	20.3453	0.78392	no	72.6974	76.6605	0.86172	no	0.535484	0.541935	0.0444444	0.0444444
chr19_17826471_17826472_-_G_T	NM_000215.3(JAK3):c.*271G>T	JAK3	chr19	17826471	17826472	3'UTR	G	T	175.671	85.7838	0.497067	no	78.8231	74.6618	0.779975	no	0.529032	0.522581	0.0296296	0.0296296
chr19_18782803_18782804_-_A_G	NM_000095.2(COMP):c.*111A>G	COMP	chr19	18782803	18782804	3'UTR	A	G					78.493	90.466	0.645268	no	0.612903	0.619355	0.0222222	0.0222222
chr1_92474983_92474984_-_T_C	NM_005263.3(GFI1):c.*1045T>C	GFI1	chr1	92474983	92474984	3'UTR	T	C					75.877	71.9818	0.851062	no	0.393548	0.4	0.0888889	0.0888889
chr19_29699309_29699310_-_T_TT	NM_001031726.3(C19orf12):c.*3402dupT	C19orf12	chr19	29699309	29699310	3'UTR	T	TT					79.124	93.2633	0.52282	no	0.43871	0.435897	0.0814815	0.0808824
chr19_29699407_29699408_-_T_C	NM_001031726.3(C19orf12):c.*3304T>C	C19orf12	chr19	29699407	29699408	3'UTR	T	C					89.7138	86.4123	0.858681	no	0.593548	0.6	0.037037	0.037037
chr19_29700401_29700402_-_C_T	NM_001031726.3(C19orf12):c.*2310C>T	C19orf12	chr19	29700401	29700402	3'UTR	C	T	24.1848	51.14	0.051841	yes	72.8105	75.4063	0.871737	no	0.419355	0.412903	0.0592593	0.0592593
chr19_29701258_29701259_-_C_T	NM_001031726.3(C19orf12):c.*1453C>T	C19orf12	chr19	29701258	29701259	3'UTR	C	T					87.7277	106.012	0.488172	no	0.516129	0.509677	0.0444444	0.0444444
chr19_29702245_29702246_-_G_A	NM_001031726.3(C19orf12):c.*466G>A	C19orf12	chr19	29702245	29702246	3'UTR	G	A					78.679	128.772	0.169493	no	0.606452	0.6	0.037037	0.037037
chr19_29702274_29702275_-_C_T	NM_001031726.3(C19orf12):c.*437C>T	C19orf12	chr19	29702274	29702275	3'UTR	C	T	63.0046	91.3606	0.616385	no	71.156	95.2015	0.136928	no	0.580645	0.574194	0.0222222	0.0222222
chr19_33387004_33387008_-_TTCT_TTCTTTCT	NM_000285.3(PEPD):c.*336_*339dupTTCT	PEPD	chr19	33387004	33387008	3'UTR	TTCT	TTCTTTCT	15.6088	19.5845	0.773159	no	85.249	70.9191	0.350009	no	0.392405	0.388889	0.057971	0.056338
chr19_35825493_35825494_-_C_T	NM_004646.3(NPHS1):c.*1020C>T	NPHS1	chr19	35825493	35825494	3'UTR	C	T	35.7973	1237.3	0.105484	no	76.6714	129.963	0.0231719	no	0.445161	0.43871	0.0518519	0.0518519
chr19_3769996_3769997_-_G_A	NM_032753.3(RAX2):c.*624G>A	RAX2	chr19	3769996	3769997	3'UTR	G	A	10.2866	28.2557	0.0487395	yes	111.399	95.38	0.746282	no	0.6	0.593548	0.0444444	0.0444444
chr19_38915264_38915265_-_G_C	NM_017827.3(SARS2):c.*341G>C	SARS2	chr19	38915264	38915265	3'UTR	G	C					82.7462	99.5174	0.527839	no	0.516129	0.516129	0.0444444	0.0444444
chr19_45485407_45485408_-_G_C	NM_206900.2(RTN2):c.*300G>C	RTN2	chr19	45485407	45485408	3'UTR	G	C	24.3129	52.6652	0.170887	no	85.6701	85.2349	0.983601	no	0.619355	0.619355	0.0444444	0.0444444
chr19_45546611_45546612_-_G_A	NM_025136.3(OPA3):c.*6902G>A	OPA3	chr19	45546611	45546612	3'UTR	G	A					108.1	69.8978	0.180365	no	0.554839	0.548387	0.0444444	0.0518519
chr19_48993130_48993131_-_C_A	NM_002103.4(GYS1):c.-19C>A	GYS1	chr19	48993130	48993131	3'UTR	C	A					72.7305	55.2651	0.222185	no	0.6	0.593548	0.0444444	0.0444444
chr19_5903917_5903918_-_T_C	NM_175614.4(NDUFA11):c.-210T>C	NDUFA11	chr19	5903917	5903918	3'UTR	T	C					75.0518	73.2134	0.889824	no	0.612903	0.619355	0.0296296	0.0296296
chr1_97078014_97078015_-_A_G	NM_000110.3(DPYD):c.*961A>G	DPYD	chr1	97078014	97078015	3'UTR	A	G					66.6671	93.8869	0.16704	no	0.303226	0.309677	0.125926	0.118519
chr1_97078075_97078076_-_T_C	NM_000110.3(DPYD):c.*900T>C	DPYD	chr1	97078075	97078076	3'UTR	T	C					80.7732	88.9733	0.656725	no	0.329032	0.335484	0.111111	0.111111
chr1_97078543_97078544_-_T_A	NM_000110.3(DPYD):c.*432T>A	DPYD	chr1	97078543	97078544	3'UTR	T	A					72.977	81.5863	0.494589	no	0.322581	0.322581	0.103704	0.103704
chr19_7114046_7114048_-_TG_-	NM_000208.3(INSR):c.*3008_*3009delTG	INSR	chr19	7114046	7114048	3'UTR	TG	-					76.3816	67.5637	0.445083	no	0.403846	0.402597	0.0367647	0.0373134
chr19_7114422_7114423_-_A_-	NM_000208.3(INSR):c.*2633delA	INSR	chr19	7114422	7114423	3'UTR	A	-	23.6494	39.3612	0.171826	no	81.2231	74.0379	0.638104	no	0.406452	0.409091	0.0740741	0.0746269
chr19_7116442_7116443_-_C_T	NM_000208.3(INSR):c.*613C>T	INSR	chr19	7116442	7116443	3'UTR	C	T	49.4458	20.6765	0.0454256	yes	82.2447	72.9242	0.558378	no	0.503226	0.496774	0.0518519	0.0518519
chr19_8580481_8580482_-_C_T	NM_030957.3(ADAMTS10):c.*411C>T	ADAMTS10	chr19	8580481	8580482	3'UTR	C	T	45.9012	45.7874	0.997449	no	65.5866	83.5719	0.212825	no	0.664516	0.658065	0.037037	0.037037
chr20_10638273_10638274_-_G_A	NM_000214.2(JAG1):c.*1224G>A	JAG1	chr20	10638273	10638274	3'UTR	G	A					82.9295	66.5482	0.337918	no	0.36129	0.354839	0.111111	0.111111
chr20_25300430_25300431_-_A_-	NM_001042472.2(ABHD12):c.*414delA	ABHD12	chr20	25300430	25300431	3'UTR	A	-	262.222	99.8927	0.732679	no	81.8156	84.3658	0.882826	no	0.567742	0.571429	0.0148148	0.0149254
chr20_34280412_34280413_-_T_C	NM_000687.3(AHCY):c.*621T>C	AHCY	chr20	34280412	34280413	3'UTR	T	C					85.452	69.3007	0.569446	no	0.483871	0.490323	0.037037	0.037037
chr20_36892395_36892396_-_C_T	NM_015474.3(SAMHD1):c.*536C>T	SAMHD1	chr20	36892395	36892396	3'UTR	C	T	17.5356	17.9963	0.950184	no	64.7927	89.9786	0.141138	no	0.445161	0.43871	0.0444444	0.0518519
chr20_36892691_36892692_-_G_A	NM_015474.3(SAMHD1):c.*240G>A	SAMHD1	chr20	36892691	36892692	3'UTR	G	A					77.1216	83.1246	0.697588	no	0.335484	0.329032	0.125926	0.125926
chr20_54153680_54153681_-_C_T	NM_000782.4(CYP24A1):c.*1091C>T	CYP24A1	chr20	54153680	54153681	3'UTR	C	T					105.678	75.5616	0.158451	no	0.322581	0.316129	0.140741	0.148148
chr20_54154072_54154074_-_GT_GTGT	NM_000782.4(CYP24A1):c.*698_*699dupGT	CYP24A1	chr20	54154072	54154074	3'UTR	GT	GTGT	25.5031	138.383	0.00454608	yes	66.3543	62.8108	0.781038	no	0.442308	0.443038	0.0661765	0.0652174
chr20_6075049_6075050_-_A_AA	NM_017671.4(FERMT1):c.*2123dupA	FERMT1	chr20	6075049	6075050	3'UTR	A	AA					62.9957	57.6003	0.69865	no	0.380645	0.378205	0.0518519	0.0514706
chr20_6075099_6075100_-_A_T	NM_017671.4(FERMT1):c.*2073A>T	FERMT1	chr20	6075099	6075100	3'UTR	A	T					67.4017	73.8732	0.607814	no	0.393548	0.393548	0.037037	0.037037
chr20_6075755_6075756_-_T_C	NM_017671.4(FERMT1):c.*1417T>C	FERMT1	chr20	6075755	6075756	3'UTR	T	C					88.0708	118.371	0.487632	no	0.548387	0.554839	0.037037	0.037037
chr21_34789456_34789457_-_A_G	NM_001754.4(RUNX1):c.*2678A>G	RUNX1	chr21	34789456	34789457	3'UTR	A	G					86.3984	77.4818	0.731536	no	0.419355	0.425806	0.0888889	0.0888889
chr21_34789537_34789541_-_TATT_-	NM_001754.4(RUNX1):c.*2594_*2597delTATT	RUNX1	chr21	34789537	34789541	3'UTR	TATT	-					58.5966	78.0097	0.269048	no	0.398734	0.409091	0.0797101	0.0746269
chr21_34790196_34790197_-_C_T	NM_001754.4(RUNX1):c.*1938C>T	RUNX1	chr21	34790196	34790197	3'UTR	C	T					64.3945	58.8423	0.736388	no	0.367742	0.36129	0.118519	0.125926
chr21_34791217_34791218_-_A_-	NM_001754.4(RUNX1):c.*917delA	RUNX1	chr21	34791217	34791218	3'UTR	A	-					69.808	55.1796	0.2688	no	0.380645	0.383117	0.0888889	0.0895522
chr21_36751300_36751301_-_C_T	NM_000411.6(HLCS):c.*2945C>T	HLCS	chr21	36751300	36751301	3'UTR	C	T					63.8862	58.2003	0.651737	no	0.387097	0.380645	0.0740741	0.0740741
chr21_36752489_36752490_-_C_T	NM_000411.6(HLCS):c.*1756C>T	HLCS	chr21	36752489	36752490	3'UTR	C	T	30.994	30.9903	0.999863	no	70.2924	66.3174	0.813301	no	0.464516	0.458065	0.0666667	0.0666667
chr21_36752501_36752502_-_G_A	NM_000411.6(HLCS):c.*1744G>A	HLCS	chr21	36752501	36752502	3'UTR	G	A	40.8867	198.195	0.233579	no					0.43871	0.432258	0.0740741	0.0740741
chr21_36753755_36753756_-_C_T	NM_000411.6(HLCS):c.*490C>T	HLCS	chr21	36753755	36753756	3'UTR	C	T	421.95	27.9546	0.0205571	yes	67.6407	87.2488	0.233873	no	0.445161	0.43871	0.0666667	0.0666667
chr21_36753975_36753976_-_T_TT	NM_000411.7(HLCS):c.*270dup	HLCS	chr21	36753975	36753976	3'UTR	T	TT					75.8089	85.3012	0.614591	no	0.470968	0.467949	0.0518519	0.0514706
chr21_41740556_41740557_-_G_A	NM_020639.2(RIPK4):c.*281G>A	RIPK4	chr21	41740556	41740557	3'UTR	G	A	86.0116	2115.42	0.0626386	yes	89.6984	86.4812	0.864944	no	0.56129	0.554839	0.0222222	0.0222222
chr21_41740764_41740765_-_G_A	NM_020639.2(RIPK4):c.*73G>A	RIPK4	chr21	41740764	41740765	3'UTR	G	A	42.4165	59.2727	0.453764	no	70.907	86.9823	0.405807	no	0.574194	0.567742	0.037037	0.037037
chr21_42372364_42372365_-_C_A	NM_024022.2(TMPRSS3):c.*397C>A	TMPRSS3	chr21	42372364	42372365	3'UTR	C	A	41.2744	21.499	0.36847	no	84.2438	64.6473	0.234008	no	0.503226	0.496774	0.0444444	0.0444444
chr21_43053287_43053288_-_T_A	NM_000071.2(CBS):c.*592T>A	CBS	chr21	43053287	43053288	3'UTR	T	A	35.6928	142.729	0.162737	no	91.5992	93.6594	0.907205	no	0.509677	0.509677	0.0296296	0.0296296
chr2_144387654_144387655_-_A_AA	NM_014795.3(ZEB2):c.*1796dupA	ZEB2	chr2	144387654	144387655	3'UTR	A	AA					66.0075	92.849	0.109693	no	0.335484	0.333333	0.0962963	0.0955882
chr2_144388045_144388046_-_C_A	NM_014795.3(ZEB2):c.*1405C>A	ZEB2	chr2	144388045	144388046	3'UTR	C	A					116.164	73.4824	0.0217934	no	0.329032	0.322581	0.0888889	0.0888889
chr2_144388936_144388937_-_T_-	NM_014795.3(ZEB2):c.*514delT	ZEB2	chr2	144388936	144388937	3'UTR	T	-	26.9768	303.336	0.0373427	yes	81.8883	86.7389	0.812832	no	0.367742	0.37013	0.0666667	0.0671642
chr21_44886143_44886146_-_AGG_-	NM_000211.4(ITGB2):c.*222_*224delAGG	ITGB2	chr21	44886143	44886146	3'UTR	AGG	-	59.1954	311.044	0.196364	no	74.4771	92.1723	0.258087	no	0.566879	0.564935	0.0218978	0.0223881
chr21_44886199_44886200_-_G_T	NM_000211.4(ITGB2):c.*168G>T	ITGB2	chr21	44886199	44886200	3'UTR	G	T	48.0524	27.2504	0.364553	no	84.9212	86.7165	0.917212	no	0.587097	0.580645	0.0222222	0.0222222
chr2_151833996_151833997_-_C_T	NM_000726.4(CACNB4):c.*5122C>T	CACNB4	chr2	151833996	151833997	3'UTR	C	T	18.5938	24.7151	0.501001	no	77.2639	79.8322	0.861038	no	0.387097	0.380645	0.111111	0.111111
chr2_151836194_151836195_-_T_C	NM_000726.4(CACNB4):c.*2924T>C	CACNB4	chr2	151836194	151836195	3'UTR	T	C	25.4281	7.82072	0.000327347	yes	92.8685	85.0363	0.727232	no	0.387097	0.393548	0.0888889	0.0888889
chr2_151838526_151838527_-_T_C	NM_000726.4(CACNB4):c.*592T>C	CACNB4	chr2	151838526	151838527	3'UTR	T	C					124.286	72.0865	0.0186109	no	0.348387	0.354839	0.0888889	0.0888889
chr2_156324810_156324811_-_G_A	NM_006186.3(NR4A2):c.*933G>A	NR4A2	chr2	156324810	156324811	3'UTR	G	A	22.8594	10.1623	0.111593	no	65.7862	48.2643	0.185717	no	0.374194	0.367742	0.0962963	0.0962963
chr2_157737030_157737031_-_G_A	NM_001105.4(ACVR1):c.*500G>A	ACVR1	chr2	157737030	157737031	3'UTR	G	A	28.4708	15.3652	0.154627	no	87.4298	105.528	0.369825	no	0.412903	0.406452	0.0740741	0.0740741
chr2_165747843_165747844_-_C_T	NM_004482.3(GALNT3):c.*937C>T	GALNT3	chr2	165747843	165747844	3'UTR	C	T					113.995	74.8072	0.21789	no	0.322581	0.316129	0.0888889	0.0888889
chr2_165990123_165990124_-_T_C	NM_001165963.1(SCN1A):c.*1121T>C	SCN1A	chr2	165990123	165990124	3'UTR	T	C					64.5298	102.621	0.0846819	no	0.387097	0.393548	0.118519	0.111111
chr2_165990267_165990268_-_T_C	NM_001165963.1(SCN1A):c.*977T>C	SCN1A	chr2	165990267	165990268	3'UTR	T	C					79.5709	68.6947	0.510528	no	0.412903	0.419355	0.0962963	0.0962963
chr2_166195389_166195390_-_A_C	NM_002977.3(SCN9A):c.*3282A>C	SCN9A	chr2	166195389	166195390	3'UTR	A	C					91.0086	88.2323	0.888513	no	0.341935	0.348387	0.0962963	0.0962963
chr2_166195685_166195686_-_T_G	NM_002977.3(SCN9A):c.*2986T>G	SCN9A	chr2	166195685	166195686	3'UTR	T	G					67.6872	75.2743	0.629864	no	0.380645	0.387097	0.0666667	0.0666667
chr2_169128284_169128285_-_C_T	NM_004525.2(LRP2):c.*378C>T	LRP2	chr2	169128284	169128285	3'UTR	C	T					57.9894	53.6748	0.705897	no	0.419355	0.412903	0.0888889	0.0888889
chr2_178526388_178526389_-_G_A	NM_133378.4(TTN):c.*623G>A	TTN	chr2	178526388	178526389	3'UTR	G	A					67.8384	148.157	0.0105507	no	0.425806	0.419355	0.0740741	0.0740741
chr2_178526814_178526815_-_C_G	NM_133378.4(TTN):c.*197C>G	TTN	chr2	178526814	178526815	3'UTR	C	G					86.4795	90.2374	0.855326	no	0.341935	0.341935	0.133333	0.133333
chr2_181536766_181536770_-_ATTG_ATTGATTG	NM_201548.4(CERKL):c.*1414_*1417dupATTG	CERKL	chr2	181536766	181536770	3'UTR	ATTG	ATTGATTG					68.0677	62.7411	0.730804	no	0.28481	0.283951	0.123188	0.119718
chr2_181537138_181537139_-_G_A	NM_201548.4(CERKL):c.*1045G>A	CERKL	chr2	181537138	181537139	3'UTR	G	A					57.1751	76.1497	0.184376	no	0.341935	0.335484	0.111111	0.111111
chr2_181537139_181537140_-_C_T	NM_201548.4(CERKL):c.*1044C>T	CERKL	chr2	181537139	181537140	3'UTR	C	T					77.1293	75.3388	0.896705	no	0.348387	0.341935	0.111111	0.111111
chr2_181538069_181538070_-_A_G	NM_201548.4(CERKL):c.*114A>G	CERKL	chr2	181538069	181538070	3'UTR	A	G	74.0863	9.47078	5.58069e-06	yes	87.0617	82.66	0.828956	no	0.503226	0.509677	0.0222222	0.0222222
chr2_189032108_189032109_-_T_C	NM_000393.4(COL5A2):c.*1961T>C	COL5A2	chr2	189032108	189032109	3'UTR	T	C	14.7802	15.2828	0.939692	no	92.9505	77.8783	0.395877	no	0.354839	0.36129	0.118519	0.111111
chr2_189033668_189033669_-_A_C	NM_000393.4(COL5A2):c.*401A>C	COL5A2	chr2	189033668	189033669	3'UTR	A	C	22.2365	44.8613	0.412313	no	50.0992	60.2891	0.314964	no	0.432258	0.43871	0.0814815	0.0814815
chr2_189561568_189561569_-_G_A	NM_014585.5(SLC40A1):c.*309G>A	SLC40A1	chr2	189561568	189561569	3'UTR	G	A					57.3974	125.897	0.00234205	no	0.393548	0.387097	0.0962963	0.0962963
chr2_190056334_190056335_-_T_C	NM_005259.2(MSTN):c.*923T>C	MSTN	chr2	190056334	190056335	3'UTR	T	C					86.113	89.3461	0.878236	no	0.316129	0.322581	0.133333	0.125926
chr2_19910831_19910832_-_A_G	NM_001006657.1(WDR35):c.*2726A>G	WDR35	chr2	19910831	19910832	3'UTR	A	G	11.659	14.6446	0.458634	no	48.6799	74.6516	0.0398236	no	0.406452	0.412903	0.103704	0.103704
chr2_19910832_19910833_-_G_T	NM_001006657.1(WDR35):c.*2725G>T	WDR35	chr2	19910832	19910833	3'UTR	G	T	48.1466	37.1847	0.690453	no	76.5364	86.4094	0.557633	no	0.406452	0.4	0.0962963	0.103704
chr2_19910934_19910935_-_T_C	NM_001006657.1(WDR35):c.*2623T>C	WDR35	chr2	19910934	19910935	3'UTR	T	C	62.3719	38.4653	0.249165	no	74.4713	90.4711	0.393176	no	0.432258	0.43871	0.0888889	0.0814815
chr2_19910935_19910936_-_A_G	NM_001006657.1(WDR35):c.*2622A>G	WDR35	chr2	19910935	19910936	3'UTR	A	G	20.9674	26.1477	0.766851	no	111.179	116.804	0.843384	no	0.432258	0.43871	0.0814815	0.0814815
chr2_19912551_19912552_-_G_A	NM_001006657.1(WDR35):c.*1006G>A	WDR35	chr2	19912551	19912552	3'UTR	G	A	12.7494	16.0116	0.537229	no	88.8817	82.2091	0.750818	no	0.380645	0.374194	0.103704	0.103704
chr2_19912559_19912560_-_A_G	NM_001006657.1(WDR35):c.*998A>G	WDR35	chr2	19912559	19912560	3'UTR	A	G	12.9082	11.4625	0.774699	no	75.581	81.3987	0.687598	no	0.367742	0.374194	0.111111	0.103704
chr2_201621672_201621673_-_G_T	NM_001044385.2(TMEM237):c.*2582G>T	TMEM237	chr2	201621672	201621673	3'UTR	G	T					46.3045	65.8987	0.280134	no	0.464516	0.458065	0.0666667	0.0666667
chr2_201622651_201622652_-_T_G	NM_001044385.2(TMEM237):c.*1603T>G	TMEM237	chr2	201622651	201622652	3'UTR	T	G	51.4598	42.7229	0.704321	no	78.0276	65.9203	0.413668	no	0.445161	0.451613	0.0814815	0.0814815
chr2_201623103_201623104_-_C_T	NM_001044385.2(TMEM237):c.*1151C>T	TMEM237	chr2	201623103	201623104	3'UTR	C	T					78.9807	90.0532	0.686208	no	0.464516	0.458065	0.0592593	0.0592593
chr2_201623146_201623147_-_A_G	NM_001044385.2(TMEM237):c.*1108A>G	TMEM237	chr2	201623146	201623147	3'UTR	A	G	38.2679	29.4414	0.738464	no	91.1241	77.5092	0.3952	no	0.412903	0.419355	0.0740741	0.0740741
chr2_202206368_202206369_-_A_G	NM_001005781.1(SUMO1):c.*435A>G	SUMO1	chr2	202206368	202206369	3'UTR	A	G	22.9188	15.6277	0.395093	no	89.027	80.4287	0.615609	no	0.387097	0.393548	0.0666667	0.0592593
chr2_206123623_206123624_-_T_C	NM_005006.6(NDUFS1):c.*561T>C	NDUFS1	chr2	206123623	206123624	3'UTR	T	C	25.0517	9.03881	0.00141669	yes	84.8381	82.8762	0.918307	no	0.4	0.406452	0.111111	0.111111
chr2_214809682_214809683_-_A_G	NM_000465.3(BARD1):c.-114A>G	BARD1	chr2	214809682	214809683	3'UTR	A	G	177.808	27.9389	0.18263	no	94.6536	55.9077	0.0160199	no	0.664516	0.670968	0.0148148	0.0148148
chr2_214931823_214931824_-_A_G	NM_173076.2(ABCA12):c.*810A>G	ABCA12	chr2	214931823	214931824	3'UTR	A	G	24.8817	74.103	0.174505	no	92.272	118.04	0.344983	no	0.445161	0.451613	0.0518519	0.0444444
chr2_222201742_222201743_-_C_T	NM_181457.3(PAX3):c.*181C>T	PAX3	chr2	222201742	222201743	3'UTR	C	T					58.1011	77.9652	0.278201	no	0.425806	0.419355	0.0518519	0.0518519
chr2_224471218_224471219_-_G_A	NM_003590.4(CUL3):c.*3026G>A	CUL3	chr2	224471218	224471219	3'UTR	G	A					73.7541	71.5863	0.910627	no	0.348387	0.341935	0.133333	0.133333
chr2_224471295_224471299_-_CCTG_-	NM_003590.4(CUL3):c.*2946_*2949delCCTG	CUL3	chr2	224471295	224471299	3'UTR	CCTG	-					140.445	68.7855	0.0173197	no	0.329114	0.318182	0.144928	0.149254
chr2_224471478_224471479_-_G_C	NM_003590.4(CUL3):c.*2766G>C	CUL3	chr2	224471478	224471479	3'UTR	G	C					73.4925	58.1776	0.370915	no	0.432258	0.432258	0.0888889	0.0888889
chr2_224471660_224471661_-_T_C	NM_003590.4(CUL3):c.*2584T>C	CUL3	chr2	224471660	224471661	3'UTR	T	C	13.3897	219.191	0.0239913	yes	51.2426	79.8302	0.0971408	no	0.451613	0.458065	0.0592593	0.0592593
chr22_26452004_26452008_-_TGTG_-	NM_022081.5(HPS4):c.*1225_*1228delTGTG	HPS4	chr22	26452004	26452008	3'UTR	TGTG	-	40.581	84.8365	0.325008	no	81.2479	62.5043	0.27815	no	0.575949	0.577922	0.0362319	0.0373134
chr22_26452481_26452482_-_G_A	NM_022081.5(HPS4):c.*751G>A	HPS4	chr22	26452481	26452482	3'UTR	G	A	60.4441	31.6217	0.688663	no					0.535484	0.529032	0.0444444	0.0444444
chr2_227002790_227002791_-_T_C	NM_000092.4(COL4A4):c.*4534T>C	COL4A4	chr2	227002790	227002791	3'UTR	T	C					72.1329	85.7563	0.454932	no	0.36129	0.367742	0.118519	0.118519
chr2_227003376_227003377_-_C_T	NM_000092.4(COL4A4):c.*3948C>T	COL4A4	chr2	227003376	227003377	3'UTR	C	T					60.612	58.514	0.828079	no	0.425806	0.419355	0.0740741	0.0740741
chr2_227003863_227003864_-_A_G	NM_000092.4(COL4A4):c.*3461A>G	COL4A4	chr2	227003863	227003864	3'UTR	A	G	20.6824	20.0919	0.949905	no	81.3394	83.2535	0.903025	no	0.367742	0.374194	0.0666667	0.0592593
chr2_227004379_227004380_-_T_C	NM_000092.4(COL4A4):c.*2945T>C	COL4A4	chr2	227004379	227004380	3'UTR	T	C					69.8488	63.8801	0.700793	no	0.548387	0.554839	0.0296296	0.0296296
chr2_227005255_227005256_-_T_C	NM_000092.4(COL4A4):c.*2069T>C	COL4A4	chr2	227005255	227005256	3'UTR	T	C					59.5381	64.1368	0.789907	no	0.322581	0.329032	0.118519	0.118519
chr2_227006212_227006213_-_G_A	NM_000092.4(COL4A4):c.*1112G>A	COL4A4	chr2	227006212	227006213	3'UTR	G	A	24.4596	11.368	0.135166	no	86.0654	80.0663	0.711756	no	0.458065	0.451613	0.0814815	0.0814815
chr2_227006755_227006756_-_C_A	NM_000092.4(COL4A4):c.*569C>A	COL4A4	chr2	227006755	227006756	3'UTR	C	A	40.4254	40.6678	0.991972	no	65.2122	83.8487	0.105129	no	0.4	0.393548	0.037037	0.0444444
chr2_227006852_227006853_-_A_T	NM_000092.4(COL4A4):c.*472A>T	COL4A4	chr2	227006852	227006853	3'UTR	A	T					115.354	176.845	0.343435	no	0.341935	0.341935	0.0814815	0.0814815
chr2_227686711_227686712_-_G_A	NM_025243.3(SLC19A3):c.*685G>A	SLC19A3	chr2	227686711	227686712	3'UTR	G	A					79.7114	74.3419	0.780948	no	0.496774	0.490323	0.037037	0.0444444
chr2_227686797_227686800_-_ATT_-	NM_025243.3(SLC19A3):c.*597_*599delATT	SLC19A3	chr2	227686797	227686800	3'UTR	ATT	-					88.4742	74.4531	0.376563	no	0.350318	0.357143	0.0948905	0.0895522
chr22_28687894_28687895_-_C_T	NM_007194.3(CHEK2):c.*2C>T	CHEK2	chr22	28687894	28687895	3'UTR	C	T	21.9093	26.6427	0.593962	no	84.5085	81.1822	0.821383	no	0.367742	0.36129	0.0666667	0.0666667
chr2_232767233_232767234_-_A_G	NM_002242.4(KCNJ13):c.*957A>G	KCNJ13	chr2	232767233	232767234	3'UTR	A	G	19.9784	23.2838	0.82616	no	67.2103	79.8046	0.299219	no	0.367742	0.374194	0.0888889	0.0888889
chr2_232768088_232768089_-_T_G	NM_002242.4(KCNJ13):c.*102T>G	KCNJ13	chr2	232768088	232768089	3'UTR	T	G					80.1478	76.7463	0.857323	no	0.406452	0.412903	0.111111	0.111111
chr22_33273947_33273948_-_A_T	NM_004737.5(LARGE1):c.*479A>T	LARGE1	chr22	33273947	33273948	3'UTR	A	T	13.9185	37.3201	0.0851522	no	82.2609	69.5689	0.442999	no	0.470968	0.470968	0.0444444	0.0444444
chr2_239957560_239957561_-_G_A	NM_004544.3(NDUFA10):c.*3557G>A	NDUFA10	chr2	239957560	239957561	3'UTR	G	A					86.3998	69.8467	0.314354	no	0.296774	0.290323	0.118519	0.125926
chr2_240714409_240714410_-_G_A	NM_004321.7(KIF1A):c.*2954G>A	KIF1A	chr2	240714409	240714410	3'UTR	G	A	82.5641	544.231	0.127165	no	85.2369	102.017	0.503454	no	0.612903	0.606452	0.0222222	0.0222222
chr22_41925253_41925254_-_G_A	NM_052945.3(TNFRSF13C):c.*113G>A	TNFRSF13C	chr22	41925253	41925254	3'UTR	G	A	84.7469	70.6267	0.930587	no					0.516129	0.509677	0.0296296	0.0296296
chr22_42058979_42058980_-_C_T	NM_000262.2(NAGA):c.*1299C>T	NAGA	chr22	42058979	42058980	3'UTR	C	T					65.1051	96.9737	0.0474477	no	0.4	0.393548	0.103704	0.111111
chr22_42060010_42060011_-_G_A	NM_000262.2(NAGA):c.*268G>A	NAGA	chr22	42060010	42060011	3'UTR	G	A					99.8226	56.9869	0.0569345	no	0.587097	0.580645	0.0296296	0.0296296
chr22_50059419_50059420_-_T_G	NM_015166.3(MLC1):c.*2163T>G	MLC1	chr22	50059419	50059420	3'UTR	T	G	19.8856	50.6998	0.0279342	yes	83.6327	74.8102	0.597875	no	0.406452	0.412903	0.0740741	0.0740741
chr22_50622939_50622940_-_A_T	NM_000487.5(ARSA):c.*2205A>T	ARSA	chr22	50622939	50622940	3'UTR	A	T					45.1099	100.118	0.00230264	no	0.580645	0.580645	0.0296296	0.0296296
chr22_50623740_50623741_-_T_TT	NM_000487.5(ARSA):c.*1404dupT	ARSA	chr22	50623740	50623741	3'UTR	T	TT					72.6773	60.0381	0.398071	no	0.483871	0.480769	0.0666667	0.0661765
chr22_50624501_50624502_-_T_C	NM_000487.5(ARSA):c.*643T>C	ARSA	chr22	50624501	50624502	3'UTR	T	C					105.613	81.6165	0.497739	no	0.632258	0.63871	0.0222222	0.0222222
chr2_26457339_26457340_-_C_A	NM_194248.2(OTOF):c.*898C>A	OTOF	chr2	26457339	26457340	3'UTR	C	A					85.0529	90.3119	0.79976	no	0.651613	0.645161	0.0148148	0.0148148
chr2_27099777_27099778_-_A_G	NM_000221.2(KHK):c.*28T>C	KHK	chr2	27099777	27099778	3'UTR	A	G	32.1998	7.53512	0.00209769	yes					0.612903	0.619355	0.0222222	0.0222222
chr2_29063351_29063352_-_G_A	NM_001029883.2(C2orf71):c.*1517G>A	C2orf71	chr2	29063351	29063352	3'UTR	G	A					152.57	61.2669	0.00433005	no	0.548387	0.541935	0.0296296	0.0296296
chr2_29063590_29063591_-_C_A	NM_001029883.2(C2orf71):c.*1278C>A	C2orf71	chr2	29063590	29063591	3'UTR	C	A					68.1312	78.2208	0.58789	no	0.470968	0.464516	0.0592593	0.0592593
chr2_29063669_29063670_-_G_C	NM_001029883.2(C2orf71):c.*1199G>C	C2orf71	chr2	29063669	29063670	3'UTR	G	C	25.8763	15.6187	0.284115	no	75.6004	75.8767	0.988469	no	0.470968	0.470968	0.0518519	0.0518519
chr2_29064577_29064578_-_G_C	NM_001029883.2(C2orf71):c.*291G>C	C2orf71	chr2	29064577	29064578	3'UTR	G	C	17.8087	38.5467	0.0952037	no	112.05	72.3936	0.222506	no	0.470968	0.470968	0.0666667	0.0666667
chr2_31525936_31525937_-_T_C	NM_000348.3(SRD5A2):c.*259T>C	SRD5A2	chr2	31525936	31525937	3'UTR	T	C					79.1637	77.2187	0.949196	no	0.458065	0.464516	0.0518519	0.0518519
chr2_38982406_38982408_-_TC_-	NM_005633.3(SOS1):c.*3416_*3417delTC	SOS1	chr2	38982406	38982408	3'UTR	TC	-					68.6836	72.8938	0.79962	no	0.333333	0.331169	0.102941	0.11194
chr2_38984968_38984969_-_G_A	NM_005633.3(SOS1):c.*855G>A	SOS1	chr2	38984968	38984969	3'UTR	G	A					106.552	105.573	0.981813	no	0.483871	0.477419	0.0740741	0.0740741
chr2_38985289_38985290_-_C_T	NM_005633.3(SOS1):c.*534C>T	SOS1	chr2	38985289	38985290	3'UTR	C	T	30.7995	28.0481	0.889863	no	59.5079	86.3632	0.259131	no	0.503226	0.496774	0.0666667	0.0666667
chr2_43886558_43886559_-_C_T	NM_133259.3(LRPPRC):c.*2041C>T	LRPPRC	chr2	43886558	43886559	3'UTR	C	T	9.45399	27.7742	0.0839925	no	54.0275	80.5155	0.173104	no	0.490323	0.483871	0.0888889	0.0888889
chr2_43886618_43886619_-_A_T	NM_133259.3(LRPPRC):c.*1981A>T	LRPPRC	chr2	43886618	43886619	3'UTR	A	T					106.421	57.7023	0.0926528	no	0.503226	0.503226	0.0740741	0.0740741
chr2_43886688_43886689_-_G_A	NM_133259.3(LRPPRC):c.*1911G>A	LRPPRC	chr2	43886688	43886689	3'UTR	G	A	54.2066	58.4768	0.948362	no	69.8206	79.8542	0.6131	no	0.483871	0.477419	0.0518519	0.0518519
chr2_43886946_43886947_-_G_A	NM_133259.3(LRPPRC):c.*1653G>A	LRPPRC	chr2	43886946	43886947	3'UTR	G	A	13.6717	42.7187	0.0269923	yes	59.7688	86.0756	0.0747783	no	0.541935	0.535484	0.037037	0.037037
chr2_43887952_43887953_-_G_C	NM_133259.3(LRPPRC):c.*647G>C	LRPPRC	chr2	43887952	43887953	3'UTR	G	C	43.5578	21.9609	0.45301	no	91.1789	65.4825	0.0633627	no	0.503226	0.503226	0.037037	0.037037
chr2_46903293_46903294_-_G_A	NM_139279.5(MCFD2):c.*2169G>A	MCFD2	chr2	46903293	46903294	3'UTR	G	A	23.6858	12.4457	0.104483	no	87.574	63.5329	0.0767139	no	0.483871	0.477419	0.0592593	0.0666667
chr2_46903321_46903322_-_G_C	NM_139279.5(MCFD2):c.*2141G>C	MCFD2	chr2	46903321	46903322	3'UTR	G	C					89.1023	94.3627	0.882121	no	0.451613	0.451613	0.0814815	0.0814815
chr2_46904108_46904109_-_G_T	NM_139279.5(MCFD2):c.*1354G>T	MCFD2	chr2	46904108	46904109	3'UTR	G	T					76.4815	86.5816	0.658866	no	0.503226	0.496774	0.037037	0.037037
chr2_46904173_46904174_-_T_C	NM_139279.5(MCFD2):c.*1289T>C	MCFD2	chr2	46904173	46904174	3'UTR	T	C	18.1424	13.4589	0.650262	no	65.7006	71.9805	0.810012	no	0.522581	0.529032	0.0296296	0.0296296
chr2_48687396_48687397_-_T_A	NM_000233.3(LHCGR):c.*300T>A	LHCGR	chr2	48687396	48687397	3'UTR	T	A					73.1012	78.9323	0.703489	no	0.309677	0.309677	0.0962963	0.0888889
chr2_49920219_49920221_-_AT_-	NM_001135659.2(NRXN1):c.*1723_*1724delAT	NRXN1	chr2	49920219	49920221	3'UTR	AT	-					84.1065	75.9438	0.663664	no	0.301282	0.305195	0.139706	0.134328
chr2_55866890_55866891_-_G_C	NM_001039348.2(EFEMP1):c.*182G>C	EFEMP1	chr2	55866890	55866891	3'UTR	G	C					61.5489	167.126	0.000605737	yes	0.354839	0.354839	0.118519	0.118519
chr2_58159599_58159600_-_A_G	NM_001114636.1(FANCL):c.*165A>G	FANCL	chr2	58159599	58159600	3'UTR	A	G					84.6244	93.3207	0.727672	no	0.43871	0.445161	0.0740741	0.0740741
chr2_61825105_61825106_-_A_G	NM_032180.2(FAM161A):c.*1349A>G	FAM161A	chr2	61825105	61825106	3'UTR	A	G	24.3068	12.279	0.303485	no	65.1216	74.7654	0.483157	no	0.341935	0.348387	0.0962963	0.0888889
chr2_61825310_61825311_-_T_G	NM_032180.2(FAM161A):c.*1144T>G	FAM161A	chr2	61825310	61825311	3'UTR	T	G	12.0902	23.7322	0.122788	no	73.8145	84.0404	0.526303	no	0.425806	0.432258	0.0814815	0.0814815
chr2_61825325_61825326_-_A_C	NM_032180.2(FAM161A):c.*1129A>C	FAM161A	chr2	61825325	61825326	3'UTR	A	C					55.0517	60.5364	0.687355	no	0.412903	0.419355	0.0888889	0.0888889
chr2_69320172_69320173_-_C_T	NM_002056.3(GFPT1):c.*6016C>T	GFPT1	chr2	69320172	69320173	3'UTR	C	T	23.0054	12.249	0.0617055	no	91.54	68.8773	0.186012	no	0.393548	0.387097	0.111111	0.118519
chr2_69320756_69320757_-_G_A	NM_002056.3(GFPT1):c.*5432G>A	GFPT1	chr2	69320756	69320757	3'UTR	G	A	79.158	51.227	0.749601	no	76.2894	45.5087	0.0601205	no	0.503226	0.496774	0.0148148	0.0222222
chr2_69320927_69320928_-_G_C	NM_002056.3(GFPT1):c.*5261G>C	GFPT1	chr2	69320927	69320928	3'UTR	G	C	73.8396	23.1937	0.157094	no	94.5944	73.9018	0.263742	no	0.503226	0.503226	0.037037	0.037037
chr2_69323965_69323966_-_C_T	NM_002056.3(GFPT1):c.*2223C>T	GFPT1	chr2	69323965	69323966	3'UTR	C	T	41.2186	33.934	0.611343	no	86.8315	90.2232	0.843834	no	0.529032	0.522581	0.0296296	0.0296296
chr2_69325522_69325523_-_T_C	NM_002056.3(GFPT1):c.*666T>C	GFPT1	chr2	69325522	69325523	3'UTR	T	C	27.4491	21.991	0.70985	no	91.2955	79.9097	0.683923	no	0.393548	0.4	0.0814815	0.0740741
chr2_69326076_69326077_-_C_T	NM_002056.3(GFPT1):c.*112C>T	GFPT1	chr2	69326076	69326077	3'UTR	C	T					70.8633	93.2895	0.195917	no	0.322581	0.316129	0.125926	0.125926
chr2_69437422_69437423_-_G_A	NM_001002755.2(NFU1):c.-1G>A	NFU1	chr2	69437422	69437423	3'UTR	G	A					114.303	85.5377	0.516528	no	0.658065	0.651613	0.0296296	0.0296296
chr2_69437567_69437569_-_CG_-	NM_001002755.2(NFU1):c.-147_-146delCG	NFU1	chr2	69437567	69437569	3'UTR	CG	-					120.639	70.9598	0.220031	no	0.634615	0.62987	0.0441176	0.0447761
chr2_74361449_74361450_-_G_A	NM_004082.4(DCTN1):c.*49G>A	DCTN1	chr2	74361449	74361450	3'UTR	G	A					97.5521	86.5252	0.607607	no	0.619355	0.612903	0.0296296	0.0296296
chr2_74529604_74529605_-_C_T	NM_013247.4(HTRA2):c.-402G>A	HTRA2	chr2	74529604	74529605	3'UTR	C	T	80.2742	13.6581	0.152331	no					0.690323	0.683871	0.0222222	0.0222222
chr2_74529643_74529644_-_C_T	NM_013247.4(HTRA2):c.-363G>A	HTRA2	chr2	74529643	74529644	3'UTR	C	T	24.9316	75.2108	0.170599	no	99.0765	108.52	0.692843	no	0.677419	0.670968	0.0222222	0.0222222
chr2_85545718_85545719_-_G_A	NM_000821.6(GGCX):c.*4215G>A	GGCX	chr2	85545718	85545719	3'UTR	G	A	24.3078	9.85696	0.00411375	yes	84.0393	102.544	0.482042	no	0.412903	0.406452	0.0888889	0.0888889
chr2_85547525_85547526_-_T_C	NM_000821.6(GGCX):c.*2408T>C	GGCX	chr2	85547525	85547526	3'UTR	T	C					88.9931	356.769	0.0040788	no	0.451613	0.458065	0.0740741	0.0740741
chr2_85547649_85547650_-_C_G	NM_000821.6(GGCX):c.*2284C>G	GGCX	chr2	85547649	85547650	3'UTR	C	G					97.9798	70.8412	0.216134	no	0.425806	0.425806	0.0666667	0.0666667
chr2_85839661_85839662_-_G_A	NM_003896.3(ST3GAL5):c.*482G>A	ST3GAL5	chr2	85839661	85839662	3'UTR	G	A	32.959	173.547	0.0746212	no	86.3982	117.81	0.183953	no	0.6	0.593548	0.0296296	0.037037
chr2_88557371_88557373_-_CT_-	NM_004836.6(EIF2AK3):c.*363_*364delCT	EIF2AK3	chr2	88557371	88557373	3'UTR	CT	-					45.3038	87.1014	0.0218287	no	0.365385	0.363636	0.117647	0.119403
chr2_96251515_96251517_-_AA_-	NM_017849.3(TMEM127):c.*2291_*2292delAA	TMEM127	chr2	96251515	96251517	3'UTR	AA	-					81.8443	87.2791	0.821412	no	0.480769	0.487013	0.0294118	0.0298507
chr3_101226597_101226598_-_G_A	NM_016247.3(IMPG2):c.*371G>A	IMPG2	chr3	101226597	101226598	3'UTR	G	A	49.5016	19.3711	0.0128898	yes	81.1627	74.3222	0.654728	no	0.458065	0.451613	0.0666667	0.0740741
chr3_101226668_101226669_-_T_G	NM_016247.3(IMPG2):c.*300T>G	IMPG2	chr3	101226668	101226669	3'UTR	T	G	71.4542	17.2543	0.0149677	yes	76.8386	60.536	0.338123	no	0.477419	0.483871	0.0592593	0.0592593
chr3_121835041_121835042_-_C_T	NM_001023570.3(IQCB1):c.-178C>T	IQCB1	chr3	121835041	121835042	3'UTR	C	T					83.7289	96.2512	0.581512	no	0.662338	0.655844	0.0298507	0.0298507
chr3_123612894_123612895_-_T_C	NM_053025.3(MYLK):c.*1210T>C	MYLK	chr3	123612894	123612895	3'UTR	T	C	19.7574	23.7146	0.522957	no	90.6601	96.3165	0.752096	no	0.367742	0.374194	0.0888889	0.0814815
chr3_123613688_123613689_-_T_TT	NM_053025.3(MYLK):c.*416dupT	MYLK	chr3	123613688	123613689	3'UTR	T	TT	39.4878	77.254	0.528259	no	67.6709	83.9118	0.330019	no	0.56129	0.557692	0.0296296	0.0294118
chr3_128480321_128480322_-_C_T	NM_032638.4(GATA2):c.*697C>T	GATA2	chr3	128480321	128480322	3'UTR	C	T					113.591	59.5524	0.0298523	no	0.548387	0.541935	0.0222222	0.0222222
chr3_132681256_132681258_-_GA_-	NM_153240.4(NPHP3):c.*652_*653delGA	NPHP3	chr3	132681256	132681258	3'UTR	GA	-	221.178	94.6321	0.678271	no	81.8079	72.4271	0.488668	no	0.429487	0.428571	0.0294118	0.0298507
chr3_14145529_14145530_-_A_AA	NM_004628.4(XPC):c.*411dupA	XPC	chr3	14145529	14145530	3'UTR	A	AA	502.602	27.0177	0.0717402	no	66.9037	53.4762	0.195729	no	0.535484	0.532051	0.0296296	0.0294118
chr3_14178622_14178623_-_G_T	NM_004628.4(XPC):c.-55G>T	XPC	chr3	14178622	14178623	3'UTR	G	T					58.9046	76.4541	0.237204	no	0.651613	0.645161	0.0222222	0.0222222
chr3_146070033_146070034_-_C_T	NM_000935.2(PLOD2):c.*683C>T	PLOD2	chr3	146070033	146070034	3'UTR	C	T					70.3075	88.7109	0.321434	no	0.335484	0.329032	0.118519	0.125926
chr3_146070129_146070130_-_G_A	NM_000935.2(PLOD2):c.*587G>A	PLOD2	chr3	146070129	146070130	3'UTR	G	A	20.4547	25.6589	0.393565	no	85.3221	101.041	0.401342	no	0.374194	0.367742	0.0814815	0.0814815
chr3_149221956_149221957_-_C_T	NM_000096.3(CP):c.-165C>T	CP	chr3	149221956	149221957	3'UTR	C	T					106.708	99.7198	0.773891	no	0.387097	0.380645	0.0592593	0.0592593
chr3_15451454_15451455_-_C_T	NM_005677.3(COLQ):c.*189C>T	COLQ	chr3	15451454	15451455	3'UTR	C	T	16.5635	12.2145	0.552289	no	75.5679	100.374	0.228894	no	0.490323	0.483871	0.0518519	0.0518519
chr3_155827614_155827615_-_A_C	NM_004733.3(SLC33A1):c.*595A>C	SLC33A1	chr3	155827614	155827615	3'UTR	A	C					68.969	75.4215	0.698244	no	0.303226	0.309677	0.111111	0.111111
chr3_155827626_155827628_-_AA_-	NM_004733.3(SLC33A1):c.*582_*583delAA	SLC33A1	chr3	155827626	155827628	3'UTR	AA	-					73.659	86.8857	0.360205	no	0.307692	0.311688	0.110294	0.11194
chr3_160257680_160257681_-_G_T	NM_020800.2(IFT80):c.*844G>T	IFT80	chr3	160257680	160257681	3'UTR	G	T	54.693	17.8128	0.100175	no	100.831	54.0538	0.0377852	no	0.393548	0.387097	0.0740741	0.0740741
chr3_165773242_165773243_-_T_A	NM_000055.3(BCHE):c.*139T>A	BCHE	chr3	165773242	165773243	3'UTR	T	A	29.0317	13.052	0.124592	no	86.3184	73.8926	0.358204	no	0.367742	0.367742	0.103704	0.103704
chr3_169765040_169765041_-_T_C	NR_001566.1(TERC):n.20T>C	TERC	chr3	169765040	169765041	3'UTR	T	C	48.1258	54.0199	0.574094	no	61.5152	83.7487	0.151082	no	0.587097	0.593548	0.037037	0.037037
chr3_172443892_172443893_-_T_C	NM_198407.2(GHSR):c.*1268T>C	GHSR	chr3	172443892	172443893	3'UTR	T	C	16.0319	22.7821	0.12261	no	79.4165	74.5471	0.752837	no	0.380645	0.387097	0.0962963	0.0962963
chr3_180614129_180614130_-_C_T	NM_181426.1(CCDC39):c.*791C>T	CCDC39	chr3	180614129	180614130	3'UTR	C	T	28.2809	23.3576	0.684362	no	83.191	78.9151	0.821232	no	0.4	0.393548	0.0888889	0.0888889
chr3_180614167_180614168_-_G_A	NM_181426.1(CCDC39):c.*753G>A	CCDC39	chr3	180614167	180614168	3'UTR	G	A					63.0364	79.7123	0.29344	no	0.348387	0.341935	0.0888889	0.0962963
chr3_184372012_184372013_-_A_G	NM_000460.3(THPO):c.*500A>G	THPO	chr3	184372012	184372013	3'UTR	A	G					40.1244	68.8001	0.0134763	no	0.425806	0.432258	0.0888889	0.0888889
chr3_24118972_24118973_-_C_A	NM_000461.4(THRB):c.*3911C>A	THRB	chr3	24118972	24118973	3'UTR	C	A					74.9443	62.5326	0.5692	no	0.329032	0.322581	0.0592593	0.0592593
chr3_24119004_24119005_-_T_-	NM_000461.4(THRB):c.*3879delT	THRB	chr3	24119004	24119005	3'UTR	T	-					62.128	88.0161	0.200464	no	0.309677	0.311688	0.0518519	0.0522388
chr3_24120551_24120552_-_G_A	NM_000461.4(THRB):c.*2332G>A	THRB	chr3	24120551	24120552	3'UTR	G	A					89.5392	90.649	0.951721	no	0.541935	0.535484	0.0148148	0.0148148
chr3_24121107_24121108_-_T_-	NM_000461.4(THRB):c.*1776delT	THRB	chr3	24121107	24121108	3'UTR	T	-	19.8869	29.7641	0.353249	no	71.5621	75.8826	0.743743	no	0.348387	0.350649	0.0962963	0.0970149
chr3_24121710_24121711_-_A_C	NM_000461.4(THRB):c.*1173A>C	THRB	chr3	24121710	24121711	3'UTR	A	C	10.9002	48.5295	0.0430089	yes	55.3944	67.2207	0.268761	no	0.503226	0.509677	0.0518519	0.0518519
chr3_24121781_24121782_-_G_A	NM_000461.4(THRB):c.*1102G>A	THRB	chr3	24121781	24121782	3'UTR	G	A					70.9511	106.655	0.177091	no	0.535484	0.529032	0.0296296	0.0296296
chr3_38548718_38548719_-_G_T	NM_198056.2(SCN5A):c.*1602G>T	SCN5A	chr3	38548718	38548719	3'UTR	G	T	97.4338	78.7022	0.716941	no	98.9171	97.3231	0.933958	no	0.63871	0.632258	0.0296296	0.0296296
chr3_38548930_38548931_-_A_G	NM_198056.2(SCN5A):c.*1390A>G	SCN5A	chr3	38548930	38548931	3'UTR	A	G					62.6689	60.0439	0.883293	no	0.445161	0.451613	0.0666667	0.0666667
chr3_38549989_38549990_-_T_C	NM_198056.2(SCN5A):c.*331T>C	SCN5A	chr3	38549989	38549990	3'UTR	T	C					86.1707	83.7827	0.904371	no	0.374194	0.380645	0.0962963	0.0888889
chr3_45755569_45755570_-_A_G	NM_020208.3(SLC6A20):c.*3408A>G	SLC6A20	chr3	45755569	45755570	3'UTR	A	G	167.413	10.0903	0.00503896	yes	73.5914	57.2634	0.425651	no	0.477419	0.483871	0.0592593	0.0592593
chr3_45756801_45756802_-_T_C	NM_020208.3(SLC6A20):c.*2176T>C	SLC6A20	chr3	45756801	45756802	3'UTR	T	C	22.7272	24.7729	0.822362	no	80.5299	73.5224	0.685771	no	0.43871	0.445161	0.0666667	0.0666667
chr3_45758060_45758061_-_G_A	NM_020208.3(SLC6A20):c.*917G>A	SLC6A20	chr3	45758060	45758061	3'UTR	G	A	44.0949	23.3073	0.0558868	no	81.5843	77.4511	0.789038	no	0.470968	0.464516	0.0740741	0.0740741
chr3_45758333_45758334_-_C_T	NM_020208.3(SLC6A20):c.*644C>T	SLC6A20	chr3	45758333	45758334	3'UTR	C	T	23.8059	44.0924	0.127256	no	78.9834	96.8451	0.318673	no	0.522581	0.516129	0.037037	0.0444444
chr3_45918262_45918263_-_A_T	NM_024513.3(FYCO1):c.*3502A>T	FYCO1	chr3	45918262	45918263	3'UTR	A	T	25.6735	107.511	0.0890413	no	77.5588	91.3719	0.508627	no	0.393548	0.393548	0.0740741	0.0740741
chr3_45919069_45919069_-_-_TT	NM_024513.3(FYCO1):c.*2695_*2696insTT	FYCO1	chr3	45919069	45919069	3'UTR	-	TT					80.7917	122.32	0.203531	no	0.461039	0.455128	0.0447761	0.0514706
chr3_45920529_45920530_-_C_A	NM_024513.3(FYCO1):c.*1235C>A	FYCO1	chr3	45920529	45920530	3'UTR	C	A	13.4225	284.379	0.0149511	yes	70.0157	61.003	0.553944	no	0.490323	0.483871	0.037037	0.037037
chr3_45920954_45920955_-_G_A	NM_024513.3(FYCO1):c.*810G>A	FYCO1	chr3	45920954	45920955	3'UTR	G	A	63.7565	20.0678	0.0752702	no	77.6723	76.2726	0.94255	no	0.516129	0.509677	0.0444444	0.0518519
chr3_45921588_45921589_-_C_T	NM_024513.3(FYCO1):c.*176C>T	FYCO1	chr3	45921588	45921589	3'UTR	C	T	17.307	20.1766	0.817892	no	76.6161	76.2816	0.987197	no	0.574194	0.567742	0.037037	0.037037
chr3_50300048_50300049_-_C_T	NM_153281.1(HYAL1):c.*434C>T	HYAL1	chr3	50300048	50300049	3'UTR	C	T					96.4068	53.0359	0.0960249	no	0.516129	0.509677	0.0444444	0.0518519
chr3_52401590_52401591_-_G_A	NM_004656.3(BAP1):c.*697G>A	BAP1	chr3	52401590	52401591	3'UTR	G	A	35.0633	22.1391	0.480232	no	78.6396	61.2773	0.477537	no	0.548387	0.541935	0.0296296	0.037037
chr3_52402227_52402228_-_C_T	NM_004656.3(BAP1):c.*60C>T	BAP1	chr3	52402227	52402228	3'UTR	C	T	57.6288	45.5158	0.686136	no	89.0466	73.7991	0.466271	no	0.587097	0.580645	0.037037	0.037037
chr3_53090631_53090632_-_A_C	NM_052859.3(RFT1):c.*1271A>C	RFT1	chr3	53090631	53090632	3'UTR	A	C					84.1657	119.28	0.392809	no	0.496774	0.503226	0.0740741	0.0740741
chr3_53091103_53091104_-_T_A	NM_052859.3(RFT1):c.*799T>A	RFT1	chr3	53091103	53091104	3'UTR	T	A	25.833	55.5858	0.109266	no	109.522	86.8168	0.32475	no	0.509677	0.509677	0.0222222	0.0222222
chr3_53091293_53091294_-_C_T	NM_052859.3(RFT1):c.*609C>T	RFT1	chr3	53091293	53091294	3'UTR	C	T					95.1825	105.868	0.786859	no	0.509677	0.503226	0.0222222	0.0222222
chr3_53091749_53091750_-_C_T	NM_052859.3(RFT1):c.*153C>T	RFT1	chr3	53091749	53091750	3'UTR	C	T					84.8608	139.265	0.17684	no	0.535484	0.529032	0.0222222	0.0296296
chr3_55466152_55466154_-_CT_-	NM_003392.4(WNT5A):c.*3938_*3939delCT	WNT5A	chr3	55466152	55466154	3'UTR	CT	-					79.8269	67.8508	0.44387	no	0.339744	0.337662	0.0808824	0.0820896
chr3_55467606_55467607_-_A_G	NM_003392.4(WNT5A):c.*2485A>G	WNT5A	chr3	55467606	55467607	3'UTR	A	G	17.9394	15.6957	0.554042	no	80.5731	81.6722	0.95396	no	0.354839	0.36129	0.0962963	0.0888889
chr3_55468300_55468301_-_G_T	NM_003392.4(WNT5A):c.*1791G>T	WNT5A	chr3	55468300	55468301	3'UTR	G	T	55.8288	27.819	0.501969	no	84.7804	84.007	0.973377	no	0.419355	0.412903	0.0592593	0.0592593
chr3_55468436_55468437_-_G_A	NM_003392.4(WNT5A):c.*1655G>A	WNT5A	chr3	55468436	55468437	3'UTR	G	A	18.1588	82.2308	0.00216123	yes	83.4731	94.627	0.592958	no	0.470968	0.464516	0.0296296	0.0296296
chr3_64094595_64094596_-_A_G	NM_198859.3(PRICKLE2):c.*4455A>G	PRICKLE2	chr3	64094595	64094596	3'UTR	A	G	22.0995	97.2886	0.0155567	yes	66.051	91.5384	0.176689	no	0.393548	0.4	0.111111	0.103704
chr3_64095188_64095189_-_C_A	NM_198859.3(PRICKLE2):c.*3862C>A	PRICKLE2	chr3	64095188	64095189	3'UTR	C	A	24.5255	21.2091	0.816201	no	61.6967	133.939	0.0242904	no	0.464516	0.458065	0.0592593	0.0666667
chr3_64095295_64095296_-_A_G	NM_198859.3(PRICKLE2):c.*3755A>G	PRICKLE2	chr3	64095295	64095296	3'UTR	A	G					69.9044	65.1117	0.734614	no	0.470968	0.477419	0.0814815	0.0740741
chr3_64096194_64096195_-_C_G	NM_198859.3(PRICKLE2):c.*2856C>G	PRICKLE2	chr3	64096194	64096195	3'UTR	C	G	53.0771	47.4194	0.818301	no	72.1299	76.8094	0.786816	no	0.425806	0.425806	0.0592593	0.0592593
chr3_64097182_64097183_-_G_C	NM_198859.3(PRICKLE2):c.*1868G>C	PRICKLE2	chr3	64097182	64097183	3'UTR	G	C					66.0148	89.8735	0.283869	no	0.387097	0.387097	0.0666667	0.0666667
chr3_64098581_64098582_-_G_T	NM_198859.3(PRICKLE2):c.*469G>T	PRICKLE2	chr3	64098581	64098582	3'UTR	G	T					89.7813	65.1413	0.215914	no	0.387097	0.380645	0.0888889	0.0888889
chr3_70955822_70955823_-_G_A	NM_032682.5(FOXP1):c.*3424G>A	FOXP1	chr3	70955822	70955823	3'UTR	G	A	59.2453	15.6754	0.0471342	yes	68.618	72.6542	0.772798	no	0.470968	0.464516	0.0592593	0.0592593
chr3_70955830_70955830_-_-_TGTGTG	NM_032682.5(FOXP1):c.*3416_*3417insTGTGTG	FOXP1	chr3	70955830	70955830	3'UTR	-	TGTGTG	46.7601	30.4833	0.195814	no	72.5596	61.622	0.400168	no	0.454545	0.45625	0.0522388	0.05
chr3_70955832_70955832_-_-_TGTGCG	NM_032682.5(FOXP1):c.*3414_*3415insTGTGCG	FOXP1	chr3	70955832	70955832	3'UTR	-	TGTGCG	21.4235	17.4833	0.664325	no	75.8398	65.8846	0.569932	no	0.454545	0.4625	0.0522388	0.05
chr3_70955832_70955834_-_TG_TGTG	NM_032682.5(FOXP1):c.*3413_*3414dupTG	FOXP1	chr3	70955832	70955834	3'UTR	TG	TGTG	33.7091	50.5305	0.0176667	no	65.9844	59.386	0.539465	no	0.455128	0.455696	0.0514706	0.0507246
chr3_70956773_70956774_-_T_A	NM_032682.5(FOXP1):c.*2473T>A	FOXP1	chr3	70956773	70956774	3'UTR	T	A	88.4654	68.2616	0.853494	no	66.947	217.342	0.00339028	no	0.354839	0.354839	0.037037	0.037037
chr3_70959127_70959128_-_A_G	NM_032682.5(FOXP1):c.*119A>G	FOXP1	chr3	70959127	70959128	3'UTR	A	G	47.113	21.2487	0.204528	no	72.064	81.5693	0.655152	no	0.432258	0.43871	0.0518519	0.0444444
chr3_70959188_70959189_-_A_AA	NM_032682.5(FOXP1):c.*58dupA	FOXP1	chr3	70959188	70959189	3'UTR	A	AA	82.5456	13.6758	0.0200858	yes					0.445161	0.442308	0.037037	0.0367647
chr3_98580176_98580177_-_C_T	NM_000097.5(CPOX):c.*506C>T	CPOX	chr3	98580176	98580177	3'UTR	C	T					62.2234	83.8297	0.245678	no	0.341935	0.335484	0.125926	0.125926
chr3_98580488_98580489_-_G_T	NM_000097.5(CPOX):c.*194G>T	CPOX	chr3	98580488	98580489	3'UTR	G	T	11.3296	11.7903	0.922978	no	92.7247	76.5748	0.394173	no	0.387097	0.380645	0.0814815	0.0814815
chr4_118281105_118281106_-_C_T	NM_003619.3(PRSS12):c.*830C>T	PRSS12	chr4	118281105	118281106	3'UTR	C	T	8.99978	17.2468	0.154234	no	82.3356	76.0116	0.744999	no	0.503226	0.496774	0.0592593	0.0666667
chr4_120694956_120694957_-_A_T	NM_018699.3(PRDM5):c.*154A>T	PRDM5	chr4	120694956	120694957	3'UTR	A	T					75.7257	84.7733	0.611737	no	0.36129	0.36129	0.103704	0.111111
chr4_121824535_121824536_-_G_A	NM_176824.2(BBS7):c.*1324G>A	BBS7	chr4	121824535	121824536	3'UTR	G	A					72.1113	79.6648	0.676927	no	0.322581	0.316129	0.125926	0.125926
chr4_121824648_121824651_-_ATT_-	NM_176824.2(BBS7):c.*1209_*1211delATT	BBS7	chr4	121824648	121824651	3'UTR	ATT	-					90.6152	52.0502	0.00108859	no	0.369427	0.376623	0.0875912	0.0895522
chr4_127919114_127919115_-_T_A	NM_152778.2(MFSD8):c.*1515T>A	MFSD8	chr4	127919114	127919115	3'UTR	T	A	12.6324	44.1998	0.0148817	yes	55.9639	72.9693	0.157096	no	0.393548	0.393548	0.0888889	0.0814815
chr4_148080016_148080017_-_C_A	NM_000901.4(NR3C2):c.*1327C>A	NR3C2	chr4	148080016	148080017	3'UTR	C	A					62.3465	90.335	0.16818	no	0.458065	0.451613	0.0296296	0.037037
chr4_174490337_174490338_-_A_T	NM_000860.5(HPGD):c.*1618A>T	HPGD	chr4	174490337	174490338	3'UTR	A	T					60.9271	79.7238	0.278281	no	0.283871	0.283871	0.111111	0.118519
chr4_174491346_174491350_-_TTGA_-	NM_000860.5(HPGD):c.*606_*609delTTGA	HPGD	chr4	174491346	174491350	3'UTR	TTGA	-	31.1708	9.66663	0.0325342	yes	81.6417	70.7157	0.633056	no	0.436709	0.441558	0.0507246	0.0522388
chr4_177430855_177430856_-_C_T	NM_000027.3(AGA):c.*852C>T	AGA	chr4	177430855	177430856	3'UTR	C	T					65.8042	103.035	0.0859223	no	0.406452	0.4	0.0592593	0.0592593
chr4_177430857_177430858_-_C_T	NM_000027.3(AGA):c.*850C>T	AGA	chr4	177430857	177430858	3'UTR	C	T					74.5131	57.0088	0.302781	no	0.419355	0.412903	0.0518519	0.0518519
chr4_25120155_25120156_-_A_G	NM_016955.3(SEPSECS):c.*3775A>G	SEPSECS	chr4	25120155	25120156	3'UTR	A	G	14.1403	21.2568	0.33071	no	75.9029	66.7165	0.566272	no	0.432258	0.43871	0.0814815	0.0814815
chr4_25120796_25120797_-_C_A	NM_016955.3(SEPSECS):c.*3134C>A	SEPSECS	chr4	25120796	25120797	3'UTR	C	A					51.0603	118.366	0.0184159	no	0.393548	0.387097	0.0888889	0.0888889
chr4_25120848_25120849_-_A_G	NM_016955.3(SEPSECS):c.*3082A>G	SEPSECS	chr4	25120848	25120849	3'UTR	A	G					75.8827	89.1486	0.354436	no	0.341935	0.348387	0.118519	0.118519
chr4_25123673_25123677_-_TTAA_-	NM_016955.3(SEPSECS):c.*254_*257delTTAA	SEPSECS	chr4	25123673	25123677	3'UTR	TTAA	-					87.0469	87.2176	0.991676	no	0.329114	0.337662	0.130435	0.126866
chr4_41744105_41744106_-_A_G	NM_003924.3(PHOX2B):c.*1701A>G	PHOX2B	chr4	41744105	41744106	3'UTR	A	G					80.098	93.8095	0.258098	no	0.341935	0.348387	0.111111	0.111111
chr4_47936147_47936148_-_A_AA	NM_000087.3(CNGA1):c.*273dupA	CNGA1	chr4	47936147	47936148	3'UTR	A	AA					79.5863	100.223	0.427021	no	0.36129	0.358974	0.0962963	0.0955882
chr4_52021049_52021050_-_T_C	NM_000232.4(SGCB):c.*2907T>C	SGCB	chr4	52021049	52021050	3'UTR	T	C					77.043	75.1251	0.89087	no	0.329032	0.335484	0.0888889	0.0888889
chr4_52021145_52021146_-_G_A	NM_000232.4(SGCB):c.*2811G>A	SGCB	chr4	52021145	52021146	3'UTR	G	A					104.977	65.7303	0.218997	no	0.483871	0.477419	0.0666667	0.0740741
chr4_52021827_52021828_-_T_-	NM_000232.4(SGCB):c.*2129delT	SGCB	chr4	52021827	52021828	3'UTR	T	-					92.6865	71.7656	0.41079	no	0.406452	0.409091	0.0888889	0.0895522
chr4_67738904_67738905_-_C_-	NM_000406.2(GNRHR):c.*1575delC	GNRHR	chr4	67738904	67738905	3'UTR	C	-	23.1041	22.4548	0.944692	no	83.7471	88.5286	0.789145	no	0.4	0.396104	0.0666667	0.0746269
chr4_67739231_67739232_-_A_C	NM_000406.2(GNRHR):c.*1248A>C	GNRHR	chr4	67739231	67739232	3'UTR	A	C	8.70203	15.6124	0.202409	no	129.839	96.2816	0.41628	no	0.406452	0.412903	0.0814815	0.0814815
chr4_83263941_83263942_-_T_C	NM_015697.7(COQ2):c.*257T>C	COQ2	chr4	83263941	83263942	3'UTR	T	C	19.7945	23.117	0.729994	no	87.3937	67.1405	0.169855	no	0.425806	0.432258	0.0814815	0.0814815
chr4_89725317_89725322_-_TTTTA_TTTTATTTTA	NM_000345.3(SNCA):c.*1306_*1310dupTTTTA	SNCA	chr4	89725317	89725322	3'UTR	TTTTA	TTTTATTTTA					70.8177	61.4361	0.592757	no	0.402516	0.390244	0.0431655	0.0486111
chr5_126543962_126543963_-_T_-	NM_001182.4(ALDH7A1):c.*1002delT	ALDH7A1	chr5	126543962	126543963	3'UTR	T	-	29.8857	57.786	0.292811	no	79.5919	83.1851	0.866227	no	0.43871	0.441558	0.0592593	0.0597015
chr5_126543964_126543965_-_A_AA	NM_001182.4(ALDH7A1):c.*1000dupA	ALDH7A1	chr5	126543964	126543965	3'UTR	A	AA	40.4757	34.723	0.679678	no	57.1149	83.6554	0.0311591	no	0.425806	0.423077	0.0592593	0.0588235
chr5_126543984_126543985_-_C_-	NM_001182.4(ALDH7A1):c.*980delC	ALDH7A1	chr5	126543984	126543985	3'UTR	C	-	13.9474	17.4676	0.724249	no	64.0288	63.7573	0.983019	no	0.43871	0.435065	0.0518519	0.0522388
chr5_126544064_126544067_-_GAG_-	NM_001182.4(ALDH7A1):c.*898_*900delGAG	ALDH7A1	chr5	126544064	126544067	3'UTR	GAG	-					96.716	69.7957	0.424498	no	0.56051	0.558442	0.0510949	0.0522388
chr5_13690477_13690478_-_G_A	NM_001369.2(DNAH5):c.*1506G>A	DNAH5	chr5	13690477	13690478	3'UTR	G	A	32.6781	29.1262	0.657308	no	88.4548	79.1202	0.580636	no	0.445161	0.43871	0.0592593	0.0592593
chr5_13690481_13690482_-_C_T	NM_001369.2(DNAH5):c.*1502C>T	DNAH5	chr5	13690481	13690482	3'UTR	C	T	22.1456	29.5085	0.509709	no	71.931	90.6593	0.290236	no	0.43871	0.432258	0.0592593	0.0592593
chr5_13690827_13690828_-_C_T	NM_001369.2(DNAH5):c.*1156C>T	DNAH5	chr5	13690827	13690828	3'UTR	C	T					86.6356	82.6582	0.809873	no	0.380645	0.374194	0.0888889	0.0888889
chr5_137619929_137619930_-_T_C	NM_017415.2(KLHL3):c.*2168T>C	KLHL3	chr5	137619929	137619930	3'UTR	T	C	29.1437	25.7131	0.829467	no					0.529032	0.535484	0.037037	0.0296296
chr5_137621042_137621043_-_A_G	NM_017415.2(KLHL3):c.*1055A>G	KLHL3	chr5	137621042	137621043	3'UTR	A	G	80.7458	17.7102	0.00262942	yes	80.8988	74.6694	0.720382	no	0.496774	0.503226	0.0444444	0.0444444
chr5_137621063_137621064_-_C_T	NM_017415.2(KLHL3):c.*1034C>T	KLHL3	chr5	137621063	137621064	3'UTR	C	T					57.4747	99.3326	0.051297	no	0.458065	0.451613	0.0740741	0.0740741
chr5_138947048_138947049_-_C_-	NM_022464.4(SIL1):c.*68delC	SIL1	chr5	138947048	138947049	3'UTR	C	-	16.8748	31.5059	0.424208	no					0.587097	0.584416	0.0296296	0.0298507
chr5_141515306_141515307_-_A_G	NM_005219.4(DIAPH1):c.*1544A>G	DIAPH1	chr5	141515306	141515307	3'UTR	A	G	101.089	37.442	0.0115953	yes	75.9432	82.2645	0.694342	no	0.541935	0.548387	0.0592593	0.0518519
chr5_141516095_141516096_-_T_C	NM_005219.4(DIAPH1):c.*755T>C	DIAPH1	chr5	141516095	141516096	3'UTR	T	C	32.0733	186.733	0.013224	yes	85.9434	96.3344	0.617873	no	0.574194	0.580645	0.0296296	0.0222222
chr5_141516317_141516318_-_G_A	NM_005219.4(DIAPH1):c.*533G>A	DIAPH1	chr5	141516317	141516318	3'UTR	G	A					58.3886	74.919	0.33179	no	0.529032	0.522581	0.0592593	0.0592593
chr5_143280379_143280380_-_C_A	NM_001018077.1(NR3C1):c.*1509C>A	NR3C1	chr5	143280379	143280380	3'UTR	C	A					72.926	65.8479	0.668401	no	0.296774	0.290323	0.162963	0.162963
chr5_14708895_14708896_-_A_-	NM_054027.4(ANKH):c.*2301delA	ANKH	chr5	14708895	14708896	3'UTR	A	-	221.356	87.5931	0.607359	no	71.6751	87.7749	0.388683	no	0.483871	0.487013	0.0296296	0.0298507
chr5_148982157_148982159_-_AA_AAAA	NM_024577.3(SH3TC2):c.*22552_*22553dupAA	SH3TC2	chr5	148982157	148982159	3'UTR	AA	AAAA					80.2951	94.9543	0.47206	no	0.391026	0.386076	0.0882353	0.0869565
chr5_148982542_148982543_-_C_G	NM_024577.3(SH3TC2):c.*22168C>G	SH3TC2	chr5	148982542	148982543	3'UTR	C	G	50.8342	7.55645	7.42458e-05	yes	80.3379	69.821	0.502005	no	0.406452	0.406452	0.0888889	0.0888889
chr5_148982675_148982676_-_G_A	NM_024577.3(SH3TC2):c.*22035G>A	SH3TC2	chr5	148982675	148982676	3'UTR	G	A	26.6418	22.3597	0.699978	no	64.7936	63.9494	0.957203	no	0.380645	0.374194	0.118519	0.118519
chr5_148985304_148985305_-_A_G	NM_024577.3(SH3TC2):c.*19406A>G	SH3TC2	chr5	148985304	148985305	3'UTR	A	G	42.4298	12.3158	0.00108236	yes	67.443	82.7456	0.34265	no	0.354839	0.36129	0.0962963	0.0962963
chr5_148985460_148985461_-_T_A	NM_024577.3(SH3TC2):c.*19250T>A	SH3TC2	chr5	148985460	148985461	3'UTR	T	A					96.7704	96.4148	0.991753	no	0.387097	0.387097	0.111111	0.103704
chr5_148989030_148989031_-_T_C	NM_024577.3(SH3TC2):c.*15680T>C	SH3TC2	chr5	148989030	148989031	3'UTR	T	C	32.7979	29.1549	0.555041	no	78.6599	89.7618	0.564815	no	0.432258	0.43871	0.0518519	0.0518519
chr5_148991196_148991197_-_A_G	NM_024577.3(SH3TC2):c.*13514A>G	SH3TC2	chr5	148991196	148991197	3'UTR	A	G					94.1489	101.371	0.722365	no	0.393548	0.4	0.111111	0.111111
chr5_148993656_148993657_-_G_C	NM_024577.3(SH3TC2):c.*11054G>C	SH3TC2	chr5	148993656	148993657	3'UTR	G	C	60.5127	63.4691	0.94005	no	78.6764	68.7234	0.470847	no	0.458065	0.458065	0.0518519	0.0518519
chr5_148994533_148994534_-_T_A	NM_024577.3(SH3TC2):c.*10177T>A	SH3TC2	chr5	148994533	148994534	3'UTR	T	A					87.2047	59.1353	0.0783953	no	0.458065	0.458065	0.0592593	0.0592593
chr5_148996271_148996273_-_CT_CTCT	NM_024577.3(SH3TC2):c.*8438_*8439dupCT	SH3TC2	chr5	148996271	148996273	3'UTR	CT	CTCT	45.1635	49.1089	0.607616	no	77.5414	61.3376	0.245825	no	0.480769	0.481013	0.0441176	0.0434783
chr5_148997685_148997690_-_ATATT_-	NM_024577.3(SH3TC2):c.*7021_*7025delATATT	SH3TC2	chr5	148997685	148997690	3'UTR	ATATT	-	14.0554	16.209	0.749412	no	71.7777	82.7976	0.511344	no	0.408805	0.422078	0.0719424	0.0597015
chr5_148998318_148998319_-_C_A	NM_024577.3(SH3TC2):c.*6392C>A	SH3TC2	chr5	148998318	148998319	3'UTR	C	A	14.5257	14.7313	0.959353	no	62.6352	77.8189	0.328817	no	0.412903	0.406452	0.103704	0.103704
chr5_148998468_148998469_-_A_G	NM_024577.3(SH3TC2):c.*6242A>G	SH3TC2	chr5	148998468	148998469	3'UTR	A	G					74.6564	75.0094	0.985798	no	0.496774	0.503226	0.0444444	0.0444444
chr5_148999021_148999022_-_A_C	NM_024577.3(SH3TC2):c.*5689A>C	SH3TC2	chr5	148999021	148999022	3'UTR	A	C					60.9288	97.0345	0.0817334	no	0.464516	0.470968	0.0740741	0.0740741
chr5_148999690_148999691_-_C_T	NM_024577.3(SH3TC2):c.*5020C>T	SH3TC2	chr5	148999690	148999691	3'UTR	C	T	16.7138	56.6198	0.167662	no	62.5927	98.97	0.0575893	no	0.470968	0.464516	0.0518519	0.0592593
chr5_149000301_149000302_-_T_A	NM_024577.3(SH3TC2):c.*4409T>A	SH3TC2	chr5	149000301	149000302	3'UTR	T	A	16.7291	46.9817	0.337333	no	75.5554	87.3796	0.52762	no	0.490323	0.490323	0.037037	0.037037
chr5_149000412_149000413_-_C_T	NM_024577.3(SH3TC2):c.*4298C>T	SH3TC2	chr5	149000412	149000413	3'UTR	C	T	17.0749	30.6783	0.108269	no	95.4237	55.1524	0.0014627	no	0.432258	0.425806	0.0740741	0.0740741
chr5_149000579_149000580_-_T_C	NM_024577.3(SH3TC2):c.*4131T>C	SH3TC2	chr5	149000579	149000580	3'UTR	T	C					93.1263	54.5791	0.0061126	no	0.348387	0.354839	0.125926	0.125926
chr5_149000807_149000808_-_A_G	NM_024577.3(SH3TC2):c.*3903A>G	SH3TC2	chr5	149000807	149000808	3'UTR	A	G					68.1106	92.0263	0.32424	no	0.4	0.406452	0.111111	0.111111
chr5_149002316_149002317_-_C_T	NM_024577.3(SH3TC2):c.*2394C>T	SH3TC2	chr5	149002316	149002317	3'UTR	C	T	32.5025	42.6043	0.699912	no	68.4789	52.2924	0.136293	no	0.529032	0.522581	0.0444444	0.0444444
chr5_149858268_149858269_-_C_G	NM_000440.2(PDE6A):c.*2626C>G	PDE6A	chr5	149858268	149858269	3'UTR	C	G					65.4195	99.3779	0.0707394	no	0.393548	0.393548	0.103704	0.103704
chr5_149860716_149860717_-_T_C	NM_000440.2(PDE6A):c.*178T>C	PDE6A	chr5	149860716	149860717	3'UTR	T	C					53.1359	57.2085	0.779292	no	0.425806	0.432258	0.0666667	0.0666667
chr5_172337411_172337412_-_C_T	NM_001017995.2(SH3PXD2B):c.*957C>T	SH3PXD2B	chr5	172337411	172337412	3'UTR	C	T					51.6446	72.471	0.176115	no	0.522581	0.516129	0.0296296	0.0296296
chr5_172337525_172337526_-_G_A	NM_001017995.2(SH3PXD2B):c.*843G>A	SH3PXD2B	chr5	172337525	172337526	3'UTR	G	A	20.6126	39.5316	0.424033	no	97.4332	61.5843	0.0293005	no	0.509677	0.503226	0.0444444	0.0444444
chr5_172337797_172337798_-_C_T	NM_001017995.2(SH3PXD2B):c.*571C>T	SH3PXD2B	chr5	172337797	172337798	3'UTR	C	T	88.6381	207.497	0.750013	no	78.3138	138.621	0.144018	no	0.593548	0.587097	0.0222222	0.0222222
chr5_179111719_179111720_-_C_T	NM_014244.4(ADAMTS2):c.*2147C>T	ADAMTS2	chr5	179111719	179111720	3'UTR	C	T					78.4562	81.6987	0.898355	no	0.541935	0.535484	0.0666667	0.0666667
chr5_179113050_179113051_-_C_T	NM_014244.4(ADAMTS2):c.*816C>T	ADAMTS2	chr5	179113050	179113051	3'UTR	C	T	12.9645	57.1839	0.000921409	yes	87.7725	85.7631	0.949783	no	0.529032	0.522581	0.0444444	0.0444444
chr5_179113578_179113579_-_G_A	NM_014244.4(ADAMTS2):c.*288G>A	ADAMTS2	chr5	179113578	179113579	3'UTR	G	A					95.4869	84.7216	0.71775	no	0.529032	0.522581	0.0518519	0.0518519
chr5_33987911_33987912_-_G_A	NM_014324.5(AMACR):c.*1181G>A	AMACR	chr5	33987911	33987912	3'UTR	G	A					74.6363	76.5151	0.936404	no	0.425806	0.419355	0.0814815	0.0814815
chr5_33988552_33988553_-_T_C	NM_014324.5(AMACR):c.*540T>C	AMACR	chr5	33988552	33988553	3'UTR	T	C					93.4844	119.688	0.419001	no	0.367742	0.374194	0.0592593	0.0592593
chr5_37106940_37106941_-_T_G	NM_023073.3(C5orf42):c.*661T>G	C5orf42	chr5	37106940	37106941	3'UTR	T	G	50.2148	54.5718	0.867051	no	88.6782	72.2178	0.332732	no	0.458065	0.464516	0.0740741	0.0740741
chr5_37107136_37107137_-_G_A	NM_023073.3(C5orf42):c.*465G>A	C5orf42	chr5	37107136	37107137	3'UTR	G	A	244.534	8.47454	0.000717485	yes	72.2165	67.2628	0.73157	no	0.425806	0.419355	0.0740741	0.0740741
chr5_38477743_38477744_-_T_A	NM_002310.5(LIFR):c.*3851T>A	LIFR	chr5	38477743	38477744	3'UTR	T	A					91.1839	75.5019	0.586586	no	0.451613	0.451613	0.0518519	0.0592593
chr5_38478882_38478883_-_C_T	NM_002310.5(LIFR):c.*2712C>T	LIFR	chr5	38478882	38478883	3'UTR	C	T					59.9009	121.329	0.00124033	yes	0.458065	0.451613	0.0740741	0.0740741
chr5_38479739_38479740_-_A_T	NM_002310.5(LIFR):c.*1855A>T	LIFR	chr5	38479739	38479740	3'UTR	A	T	122.248	20.1778	0.0540203	yes	87.0733	52.1978	0.048166	no	0.522581	0.522581	0.037037	0.037037
chr5_38479740_38479741_-_C_T	NM_002310.5(LIFR):c.*1854C>T	LIFR	chr5	38479740	38479741	3'UTR	C	T					64.7602	84.1512	0.228787	no	0.529032	0.522581	0.037037	0.0444444
chr5_38480130_38480131_-_T_TT	NM_002310.5(LIFR):c.*1464dupT	LIFR	chr5	38480130	38480131	3'UTR	T	TT	26.1653	25.7055	0.959001	no	78.5186	60.5161	0.217724	no	0.329032	0.326923	0.0740741	0.0735294
chr5_38480292_38480293_-_T_G	NM_002310.5(LIFR):c.*1302T>G	LIFR	chr5	38480292	38480293	3'UTR	T	G	57.4331	60.6599	0.952222	no					0.458065	0.464516	0.0444444	0.0444444
chr5_41730687_41730688_-_G_A	NM_000436.3(OXCT1):c.*1041G>A	OXCT1	chr5	41730687	41730688	3'UTR	G	A					63.9817	57.1819	0.616036	no	0.4	0.393548	0.0814815	0.0814815
chr5_53098069_53098070_-_G_A	NM_176806.3(MOCS2):c.*1019G>A	MOCS2	chr5	53098069	53098070	3'UTR	G	A					72.3988	74.9128	0.902545	no	0.283871	0.277419	0.118519	0.118519
chr5_53098458_53098459_-_G_A	NM_176806.3(MOCS2):c.*630G>A	MOCS2	chr5	53098458	53098459	3'UTR	G	A	394.638	11.492	0.0226512	yes					0.4	0.393548	0.103704	0.103704
chr5_58972739_58972740_-_T_C	NM_001104631.1(PDE4D):c.*1924T>C	PDE4D	chr5	58972739	58972740	3'UTR	T	C	44.8142	34.1668	0.714091	no	89.0881	73.0874	0.393953	no	0.419355	0.425806	0.0962963	0.0962963
chr5_58974081_58974082_-_T_TT	NM_001104631.1(PDE4D):c.*582dupT	PDE4D	chr5	58974081	58974082	3'UTR	T	TT					77.1265	85.9406	0.689875	no	0.341935	0.339744	0.125926	0.125
chr5_58974630_58974631_-_T_TT	NM_001104631.1(PDE4D):c.*33dupT	PDE4D	chr5	58974630	58974631	3'UTR	T	TT					57.5193	53.8922	0.6834	no	0.43871	0.435897	0.0296296	0.0294118
chr5_6633167_6633168_-_C_A	NM_017755.5(NSUN2):c.-189C>A	NSUN2	chr5	6633167	6633168	3'UTR	C	A	44.2047	37.0795	0.804433	no	86.2767	77.5505	0.698822	no	0.535484	0.529032	0.0296296	0.0296296
chr5_78777349_78777350_-_T_C	NM_000046.3(ARSB):c.*3047T>C	ARSB	chr5	78777349	78777350	3'UTR	T	C					72.11	77.0319	0.789955	no	0.335484	0.341935	0.118519	0.111111
chr5_78777537_78777538_-_T_C	NM_000046.3(ARSB):c.*2859T>C	ARSB	chr5	78777537	78777538	3'UTR	T	C	29.0064	19.6693	0.35063	no	66.9565	73.8872	0.622595	no	0.445161	0.451613	0.0518519	0.0518519
chr5_78777788_78777789_-_G_A	NM_000046.3(ARSB):c.*2608G>A	ARSB	chr5	78777788	78777789	3'UTR	G	A					65.2506	77.6576	0.385312	no	0.567742	0.56129	0.037037	0.037037
chr5_78778883_78778884_-_C_T	NM_000046.3(ARSB):c.*1513C>T	ARSB	chr5	78778883	78778884	3'UTR	C	T	73.7307	34.5616	0.335091	no	73.9718	70.6125	0.847136	no	0.490323	0.483871	0.0666667	0.0666667
chr5_78779009_78779010_-_C_T	NM_000046.3(ARSB):c.*1387C>T	ARSB	chr5	78779009	78779010	3'UTR	C	T					48.5061	60.9405	0.421291	no	0.393548	0.387097	0.0888889	0.0888889
chr5_78779036_78779037_-_T_A	NM_000046.3(ARSB):c.*1360T>A	ARSB	chr5	78779036	78779037	3'UTR	T	A					54.9559	74.4693	0.308054	no	0.387097	0.387097	0.0740741	0.0740741
chr5_78779249_78779250_-_G_A	NM_000046.3(ARSB):c.*1147G>A	ARSB	chr5	78779249	78779250	3'UTR	G	A					81.1398	80.9544	0.991049	no	0.503226	0.496774	0.037037	0.037037
chr5_88718467_88718468_-_G_A	NM_002397.4(MEF2C):c.*4136G>A	MEF2C	chr5	88718467	88718468	3'UTR	G	A					61.8438	80.8265	0.0696862	no	0.432258	0.425806	0.0814815	0.0888889
chr5_88722488_88722489_-_A_-	NM_002397.4(MEF2C):c.*115delA	MEF2C	chr5	88722488	88722489	3'UTR	A	-	12.982	13.0864	0.977056	no	77.3946	88.5293	0.642268	no	0.412903	0.415584	0.0962963	0.0970149
chr5_96392738_96392739_-_A_-	NM_000439.4(PCSK1):c.*262delA	PCSK1	chr5	96392738	96392739	3'UTR	A	-					84.6066	73.6605	0.51392	no	0.425806	0.428571	0.0444444	0.0447761
chr6_100388908_100388910_-_TG_TGTG	NM_005068.2(SIM1):c.*1451_*1452dupTG	SIM1	chr6	100388908	100388910	3'UTR	TG	TGTG					72.2722	68.1182	0.777413	no	0.435897	0.436709	0.0735294	0.0724638
chr6_107154307_107154308_-_G_A	NM_020381.3(PDSS2):c.*311G>A	PDSS2	chr6	107154307	107154308	3'UTR	G	A	32.1728	51.2995	0.508924	no	82.1442	81.1504	0.961532	no	0.541935	0.535484	0.037037	0.037037
chr6_10762888_10762889_-_G_A	NM_001242957.2(MAK):c.*1563G>A	MAK	chr6	10762888	10762889	3'UTR	G	A					89.9909	103.091	0.548188	no	0.316129	0.309677	0.133333	0.140741
chr6_10763485_10763486_-_C_T	NM_001242957.2(MAK):c.*966C>T	MAK	chr6	10763485	10763486	3'UTR	C	T					124.275	75.6097	0.0205733	no	0.393548	0.387097	0.0740741	0.0740741
chr6_107869911_107869914_-_GTT_-	NM_007214.4(SEC63):c.*1790_*1792delGTT	SEC63	chr6	107869911	107869914	3'UTR	GTT	-	22.396	29.1469	0.574357	no	80.0784	80.1467	0.996702	no	0.369427	0.37013	0.0729927	0.0746269
chr6_107870360_107870361_-_G_A	NM_007214.4(SEC63):c.*1343G>A	SEC63	chr6	107870360	107870361	3'UTR	G	A					54.0718	55.1609	0.937794	no	0.387097	0.380645	0.0740741	0.0740741
chr6_10873248_10873249_-_A_G	NM_004752.3(GCM2):c.*746A>G	GCM2	chr6	10873248	10873249	3'UTR	A	G					83.4817	79.7121	0.845388	no	0.335484	0.341935	0.111111	0.103704
chr6_10873383_10873384_-_T_C	NM_004752.3(GCM2):c.*611T>C	GCM2	chr6	10873383	10873384	3'UTR	T	C	38.6749	24.9454	0.230206	no	84.265	87.3663	0.871315	no	0.354839	0.36129	0.0962963	0.0888889
chr6_123216734_123216735_-_C_T	NM_006073.3(TRDN):c.*1866C>T	TRDN	chr6	123216734	123216735	3'UTR	C	T					75.8434	97.9045	0.373028	no	0.380645	0.374194	0.111111	0.111111
chr6_123217141_123217143_-_CA_CACA	NM_006073.3(TRDN):c.*1458_*1459dupCA	TRDN	chr6	123217141	123217143	3'UTR	CA	CACA					73.7705	58.2839	0.21699	no	0.467949	0.468354	0.0294118	0.0289855
chr6_135285257_135285258_-_T_G	NM_017651.4(AHI1):c.*387T>G	AHI1	chr6	135285257	135285258	3'UTR	T	G					91.0101	66.5197	0.122043	no	0.36129	0.367742	0.125926	0.118519
chr6_137197733_137197734_-_G_A	NM_000416.2(IFNGR1):c.*297G>A	IFNGR1	chr6	137197733	137197734	3'UTR	G	A	88.2085	53.6514	0.589356	no	71.4814	88.0608	0.436845	no	0.496774	0.490323	0.0740741	0.0740741
chr6_15522822_15522824_-_AA_AAAA	NM_032122.4(DTNBP1):c.*151_*152dupAA	DTNBP1	chr6	15522822	15522824	3'UTR	AA	AAAA					73.8283	61.5102	0.601305	no	0.410256	0.405063	0.0808824	0.0797101
chr6_18121012_18121013_-_A_G	NM_198586.2(NHLRC1):c.*406A>G	NHLRC1	chr6	18121012	18121013	3'UTR	A	G	75.8487	51.5264	0.656344	no	57.4328	118.948	0.00267188	no	0.503226	0.509677	0.0444444	0.037037
chr6_18129009_18129010_-_C_A	NM_000367.4(TPMT):c.*1658C>A	TPMT	chr6	18129009	18129010	3'UTR	C	A					107.157	92.0482	0.572938	no	0.548387	0.541935	0.037037	0.0444444
chr6_18129449_18129450_-_G_A	NM_000367.4(TPMT):c.*1218G>A	TPMT	chr6	18129449	18129450	3'UTR	G	A	40.6288	19.5964	0.0324777	yes					0.464516	0.458065	0.0740741	0.0740741
chr6_18129463_18129464_-_G_A	NM_000367.4(TPMT):c.*1204G>A	TPMT	chr6	18129463	18129464	3'UTR	G	A	19.057	28.5017	0.359318	no	74.3631	66.7606	0.599812	no	0.432258	0.425806	0.0888889	0.0888889
chr6_18130144_18130145_-_G_A	NM_000367.4(TPMT):c.*523G>A	TPMT	chr6	18130144	18130145	3'UTR	G	A	35.1352	46.2438	0.534175	no	74.3331	75.6812	0.925485	no	0.516129	0.509677	0.0592593	0.0592593
chr6_18130153_18130154_-_C_T	NM_000367.4(TPMT):c.*514C>T	TPMT	chr6	18130153	18130154	3'UTR	C	T	77.64	27.517	0.179455	no	92.1062	76.1371	0.371922	no	0.509677	0.503226	0.0592593	0.0592593
chr6_31859194_31859195_-_C_T	NM_000434.3(NEU1):c.*524C>T	NEU1	chr6	31859194	31859195	3'UTR	C	T	17.5237	14.5485	0.347893	no	84.3563	80.76	0.836545	no	0.374194	0.367742	0.0740741	0.0740741
chr6_35498021_35498022_-_G_A	NM_003322.5(TULP1):c.*305G>A	TULP1	chr6	35498021	35498022	3'UTR	G	A					95.7963	59.0914	0.0872739	no	0.645161	0.63871	0.037037	0.037037
chr6_39904645_39904646_-_G_A	NM_005943.5(MOCS1):c.*2479G>A	MOCS1	chr6	39904645	39904646	3'UTR	G	A	63.7825	45.2431	0.79938	no	64.5329	50.1082	0.320165	no	0.535484	0.529032	0.0444444	0.0444444
chr6_39905353_39905354_-_G_A	NM_005943.5(MOCS1):c.*1771G>A	MOCS1	chr6	39905353	39905354	3'UTR	G	A					57.4439	56.1221	0.94084	no	0.509677	0.503226	0.0814815	0.0814815
chr6_39934416_39934417_-_A_C	NM_005943.5(MOCS1):c.-6839A>C	MOCS1	chr6	39934416	39934417	3'UTR	A	C	21.0318	37.6869	0.522835	no	106.832	90.2254	0.549839	no	0.670968	0.677419	0.0222222	0.0222222
chr6_42184363_42184364_-_A_G	NM_002098.5(GUCA1B):c.*451A>G	GUCA1B	chr6	42184363	42184364	3'UTR	A	G					73.1809	93.5218	0.21329	no	0.593548	0.6	0.0222222	0.0148148
chr6_42697287_42697288_-_C_A	NM_000322.4(PRPH2):c.*1007C>A	PRPH2	chr6	42697287	42697288	3'UTR	C	A	15.8036	29.6674	0.125115	no	67.365	78.9092	0.544592	no	0.483871	0.477419	0.0296296	0.0296296
chr6_42979228_42979229_-_C_T	NM_000287.3(PEX6):c.-79C>T	PEX6	chr6	42979228	42979229	3'UTR	C	T	37.5833	40.128	0.822901	no	97.5831	97.3708	0.990976	no	0.632258	0.625806	0.0222222	0.0222222
chr6_44298826_44298827_-_C_T	NM_020745.3(AARS2):c.*1720C>T	AARS2	chr6	44298826	44298827	3'UTR	C	T	108.228	30.6245	0.188416	no	86.635	67.2191	0.219816	no	0.522581	0.516129	0.0296296	0.0296296
chr6_44298827_44298828_-_T_C	NM_020745.3(AARS2):c.*1719T>C	AARS2	chr6	44298827	44298828	3'UTR	T	C					123.573	65.3254	0.0370204	no	0.516129	0.522581	0.0296296	0.0296296
chr6_51616527_51616529_-_AA_AAAA	NM_138694.3(PKHD1):c.*2552_*2553dupAA	PKHD1	chr6	51616527	51616529	3'UTR	AA	AAAA					55.7071	55.4568	0.98639	no	0.403846	0.398734	0.0661765	0.0652174
chr6_51617745_51617746_-_T_C	NM_138694.3(PKHD1):c.*1335T>C	PKHD1	chr6	51617745	51617746	3'UTR	T	C					112.696	81.9095	0.267916	no	0.470968	0.477419	0.0740741	0.0740741
chr6_51618860_51618861_-_A_G	NM_138694.3(PKHD1):c.*220A>G	PKHD1	chr6	51618860	51618861	3'UTR	A	G					136.235	61.0341	0.00124434	yes	0.387097	0.393548	0.103704	0.103704
chr6_51619053_51619054_-_G_A	NM_138694.3(PKHD1):c.*27G>A	PKHD1	chr6	51619053	51619054	3'UTR	G	A	65.7253	37.2366	0.302315	no	80.4609	82.6273	0.89171	no	0.503226	0.496774	0.0444444	0.0518519
chr6_56615103_56615104_-_A_C	NM_001723.5(DST):c.*413A>C	DST	chr6	56615103	56615104	3'UTR	A	C					71.4282	63.784	0.548098	no	0.432258	0.43871	0.0444444	0.0444444
chr6_57189725_57189726_-_T_G	NM_183227.2(RAB23):c.*735T>G	RAB23	chr6	57189725	57189726	3'UTR	T	G					59.6811	86.2276	0.151329	no	0.335484	0.341935	0.125926	0.125926
chr6_63720183_63720184_-_A_-	NM_001142800.1(EYS):c.*412delA	EYS	chr6	63720183	63720184	3'UTR	A	-					71.5754	78.3419	0.662769	no	0.309677	0.311688	0.111111	0.11194
chr6_73593446_73593447_-_G_T	NM_012434.4(SLC17A5):c.*1630G>T	SLC17A5	chr6	73593446	73593447	3'UTR	G	T					58.943	85.9124	0.0808204	no	0.290323	0.283871	0.118519	0.118519
chr6_73593511_73593512_-_C_T	NM_012434.4(SLC17A5):c.*1565C>T	SLC17A5	chr6	73593511	73593512	3'UTR	C	T					122.847	70.758	0.00829389	no	0.341935	0.335484	0.111111	0.111111
chr6_73594703_73594704_-_G_A	NM_012434.4(SLC17A5):c.*373G>A	SLC17A5	chr6	73594703	73594704	3'UTR	G	A					55.5073	90.8978	0.0849124	no	0.4	0.393548	0.0814815	0.0888889
chr6_79486530_79486531_-_T_C	NM_181714.3(LCA5):c.*473T>C	LCA5	chr6	79486530	79486531	3'UTR	T	C	43.1311	70.0325	0.352871	no	78.7833	81.7048	0.860817	no	0.535484	0.541935	0.0814815	0.0740741
chr6_79915054_79915059_-_ACATA_-	NM_022726.3(ELOVL4):c.*1549_*1553delACATA	ELOVL4	chr6	79915054	79915059	3'UTR	ACATA	-					85.0327	77.359	0.653425	no	0.358491	0.363636	0.107914	0.104478
chr6_96889461_96889462_-_T_G	NM_014165.3(NDUFAF4):c.*1642T>G	NDUFAF4	chr6	96889461	96889462	3'UTR	T	G	14.6524	12.7191	0.391879	no	83.2128	81.4674	0.918916	no	0.341935	0.348387	0.118519	0.118519
chr7_103374306_103374307_-_A_G	NM_198999.2(SLC26A5):c.*92A>G	SLC26A5	chr7	103374306	103374307	3'UTR	A	G					58.4064	70.8273	0.525652	no	0.412903	0.419355	0.0962963	0.0888889
chr7_107765468_107765469_-_G_A	NM_000111.2(SLC26A3):c.*386G>A	SLC26A3	chr7	107765468	107765469	3'UTR	G	A					74.1053	60.2087	0.37548	no	0.387097	0.380645	0.125926	0.133333
chr7_107765649_107765650_-_G_C	NM_000111.2(SLC26A3):c.*205G>C	SLC26A3	chr7	107765649	107765650	3'UTR	G	C					76.0542	69.649	0.693678	no	0.316129	0.316129	0.140741	0.140741
chr7_130394291_130394292_-_A_G	NM_018718.2(CEP41):c.*4599A>G	CEP41	chr7	130394291	130394292	3'UTR	A	G	94.7611	130.724	0.812667	no	82.1666	102.11	0.244751	no	0.509677	0.516129	0.0296296	0.0222222
chr7_130394925_130394926_-_A_G	NM_018718.2(CEP41):c.*3965A>G	CEP41	chr7	130394925	130394926	3'UTR	A	G	22.7197	26.5353	0.822488	no	77.4145	55.3051	0.13281	no	0.490323	0.496774	0.037037	0.0296296
chr7_130395149_130395150_-_A_T	NM_018718.2(CEP41):c.*3741A>T	CEP41	chr7	130395149	130395150	3'UTR	A	T					80.9688	71.0616	0.548104	no	0.329032	0.329032	0.125926	0.125926
chr7_130395846_130395847_-_A_G	NM_018718.2(CEP41):c.*3044A>G	CEP41	chr7	130395846	130395847	3'UTR	A	G	49.171	101.788	0.750302	no	75.5494	59.1579	0.131276	no	0.387097	0.393548	0.0814815	0.0814815
chr7_130398185_130398186_-_G_A	NM_018718.2(CEP41):c.*705G>A	CEP41	chr7	130398185	130398186	3'UTR	G	A	39.4255	56.94	0.369084	no	85.3317	76.954	0.64496	no	0.580645	0.574194	0.0444444	0.0444444
chr7_130398557_130398558_-_C_T	NM_018718.2(CEP41):c.*333C>T	CEP41	chr7	130398557	130398558	3'UTR	C	T	46.2859	50.1874	0.885561	no	90.024	70.8671	0.278656	no	0.4	0.393548	0.0666667	0.0666667
chr7_150945169_150945170_-_C_A	NM_000238.3(KCNH2):c.*195C>A	KCNH2	chr7	150945169	150945170	3'UTR	C	A					74.4427	77.2018	0.818639	no	0.63871	0.632258	0.037037	0.037037
chr7_156681304_156681305_-_G_T	NM_022458.3(LMBR1):c.*2773G>T	LMBR1	chr7	156681304	156681305	3'UTR	G	T					75.9755	56.6169	0.255986	no	0.548387	0.541935	0.0592593	0.0592593
chr7_16087888_16087889_-_C_G	NM_001101426.3(ISPD):c.*3806C>G	ISPD	chr7	16087888	16087889	3'UTR	C	G					78.3889	100.645	0.326336	no	0.322581	0.322581	0.0962963	0.0962963
chr7_16088503_16088504_-_C_A	NM_001101426.3(ISPD):c.*3191C>A	ISPD	chr7	16088503	16088504	3'UTR	C	A	16.3444	30.6249	0.285153	no	109.324	76.6575	0.203452	no	0.593548	0.587097	0.0444444	0.0444444
chr7_16088555_16088556_-_A_G	NM_001101426.3(ISPD):c.*3139A>G	ISPD	chr7	16088555	16088556	3'UTR	A	G	16.8571	17.3924	0.962728	no					0.554839	0.56129	0.0666667	0.0592593
chr7_16089230_16089231_-_G_A	NM_001101426.3(ISPD):c.*2464G>A	ISPD	chr7	16089230	16089231	3'UTR	G	A					86.9191	50.6024	0.00987571	no	0.374194	0.367742	0.237037	0.237037
chr7_16090541_16090542_-_T_TT	NM_001101426.3(ISPD):c.*1153dupT	ISPD	chr7	16090541	16090542	3'UTR	T	TT					74.4031	61.8686	0.502607	no	0.445161	0.442308	0.0518519	0.0514706
chr7_21901315_21901316_-_A_G	NM_001277115.1(DNAH11):c.*62T>C	DNAH11	chr7	21901315	21901316	3'UTR	A	G					54.9608	55.812	0.95348	no	0.464516	0.470968	0.0592593	0.0592593
chr7_21901517_21901518_-_C_T	NM_001277115.1(DNAH11):c.*264G>A	DNAH11	chr7	21901517	21901518	3'UTR	C	T	39.7958	11.3251	0.00697206	yes	74.7608	62.7857	0.428343	no	0.516129	0.509677	0.037037	0.037037
chr7_22941835_22941836_-_C_T	NM_032581.3(FAM126A):c.*3753C>T	FAM126A	chr7	22941835	22941836	3'UTR	C	T					75.5791	87.1276	0.525816	no	0.348387	0.341935	0.125926	0.125926
chr7_22943544_22943545_-_A_G	NM_032581.3(FAM126A):c.*2044A>G	FAM126A	chr7	22943544	22943545	3'UTR	A	G					54.7438	88.4832	0.0276449	no	0.43871	0.445161	0.0740741	0.0740741
chr7_22943992_22943993_-_A_G	NM_032581.3(FAM126A):c.*1596A>G	FAM126A	chr7	22943992	22943993	3'UTR	A	G	15.3642	15.7749	0.958059	no	77.7689	54.0003	0.0861803	no	0.419355	0.425806	0.0666667	0.0666667
chr7_24698798_24698802_-_TTAG_TTAGTTAG	NM_004403.2(GSDME):c.*224_*227dupTTAG	GSDME	chr7	24698798	24698802	3'UTR	TTAG	TTAGTTAG	29.6684	82.0419	0.259433	no	67.1761	101.552	0.0769426	no	0.493671	0.487654	0.057971	0.0633803
chr7_25121403_25121404_-_C_G	NM_018947.5(CYCS):c.*2297C>G	CYCS	chr7	25121403	25121404	3'UTR	C	G					74.3792	51.5726	0.238706	no	0.516129	0.516129	0.0518519	0.0518519
chr7_25121820_25121821_-_C_T	NM_018947.5(CYCS):c.*1880C>T	CYCS	chr7	25121820	25121821	3'UTR	C	T					45.5468	85.608	0.0478322	no	0.522581	0.516129	0.0518519	0.0518519
chr7_27093289_27093290_-_C_T	NM_005522.4(HOXA1):c.*1150C>T	HOXA1	chr7	27093289	27093290	3'UTR	C	T	57.4169	24.4339	0.345016	no	62.0051	74.3425	0.540565	no	0.406452	0.4	0.103704	0.103704
chr7_41961910_41961911_-_T_C	NM_000168.5(GLI3):c.*2419T>C	GLI3	chr7	41961910	41961911	3'UTR	T	C	11.0772	16.0576	0.478309	no	75.9778	72.2822	0.872615	no	0.451613	0.458065	0.037037	0.037037
chr7_41963740_41963741_-_T_C	NM_000168.5(GLI3):c.*589T>C	GLI3	chr7	41963740	41963741	3'UTR	T	C					75.7619	77.3034	0.932584	no	0.458065	0.464516	0.0592593	0.0592593
chr7_5973395_5973396_-_G_T	NM_000535.6(PMS2):c.*3G>T	PMS2	chr7	5973395	5973396	3'UTR	G	T	31.7286	10.2016	0.0016165	yes	85.849	59.7357	0.130713	no	0.367742	0.36129	0.0888889	0.0888889
chr7_6009020_6009021_-_C_T	NM_000535.6(PMS2):c.-2C>T	PMS2	chr7	6009020	6009021	3'UTR	C	T	55.7043	74.9642	0.433885	no	85.8849	69.4931	0.230949	no	0.62	0.613333	0.0153846	0.0153846
chr7_65982201_65982202_-_G_C	NM_000181.3(GUSB):c.-19G>C	GUSB	chr7	65982201	65982202	3'UTR	G	C					79.4075	53.3282	0.147198	no	0.709677	0.709677	0.0296296	0.0296296
chr8_102205007_102205008_-_T_C	NM_015713.4(RRM2B):c.*3125T>C	RRM2B	chr8	102205007	102205008	3'UTR	T	C	16.7314	49.1376	0.0680496	no	72.3456	70.1537	0.902478	no	0.419355	0.425806	0.0444444	0.0444444
chr8_102205631_102205636_-_AAGTT_-	NM_015713.4(RRM2B):c.*2497_*2501delAAGTT	RRM2B	chr8	102205631	102205636	3'UTR	AAGTT	-					76.4724	82.3555	0.737098	no	0.308176	0.311688	0.122302	0.119403
chr8_104379449_104379450_-_A_G	NM_001385.2(DPYS):c.*408A>G	DPYS	chr8	104379449	104379450	3'UTR	A	G					78.0976	87.878	0.532547	no	0.283871	0.290323	0.125926	0.125926
chr8_115412179_115412180_-_T_-	NM_014112.4(TRPS1):c.*1843delT	TRPS1	chr8	115412179	115412180	3'UTR	T	-	15.6744	11.3138	0.0653878	no	77.7542	67.2358	0.510351	no	0.348387	0.350649	0.111111	0.11194
chr8_115412521_115412522_-_A_G	NM_014112.4(TRPS1):c.*1501A>G	TRPS1	chr8	115412521	115412522	3'UTR	A	G					71.764	83.6521	0.669577	no	0.316129	0.322581	0.118519	0.118519
chr8_133238693_133238694_-_G_A	NM_006096.3(NDRG1):c.*184G>A	NDRG1	chr8	133238693	133238694	3'UTR	G	A	18.5505	94.97	0.0563051	yes					0.56129	0.554839	0.0296296	0.0296296
chr8_142872782_142872783_-_G_C	NM_000497.3(CYP11B1):c.*1590G>C	CYP11B1	chr8	142872782	142872783	3'UTR	G	C					46.3561	72.8511	0.182727	no	0.503226	0.503226	0.0592593	0.0592593
chr8_142873163_142873164_-_C_T	NM_000497.3(CYP11B1):c.*1209C>T	CYP11B1	chr8	142873163	142873164	3'UTR	C	T	94.4136	9.8684	0.000810557	yes	88.8171	66.5574	0.254669	no	0.567742	0.56129	0.037037	0.037037
chr8_142911475_142911476_-_C_T	NM_000498.3(CYP11B2):c.*504C>T	CYP11B2	chr8	142911475	142911476	3'UTR	C	T	252.144	25.5821	0.246173	no	79.5149	47.4702	0.0635482	no	0.548387	0.541935	0.037037	0.037037
chr8_22114948_22114949_-_G_C	NM_005144.4(HR):c.*751G>C	HR	chr8	22114948	22114949	3'UTR	G	C	44.024	60.5243	0.743647	no	144.235	86.1421	0.0261162	no	0.606452	0.606452	0.0296296	0.0296296
chr8_27460233_27460234_-_C_A	NM_000742.3(CHRNA2):c.*1395C>A	CHRNA2	chr8	27460233	27460234	3'UTR	C	A					104.703	79.3568	0.403789	no	0.612903	0.606452	0.0222222	0.0222222
chr8_38144156_38144157_-_T_G	NM_000349.2(STAR):c.*116T>G	STAR	chr8	38144156	38144157	3'UTR	T	G	34.7503	24.0347	0.718722	no	68.3744	71.2248	0.86054	no	0.483871	0.490323	0.0666667	0.0666667
chr8_38413613_38413614_-_G_A	NM_023110.2(FGFR1):c.*14G>A	FGFR1	chr8	38413613	38413614	3'UTR	G	A					100.972	73.0162	0.378578	no	0.658065	0.651613	0.0222222	0.0222222
chr8_41653508_41653509_-_C_T	NM_000037.3(ANK1):c.*2281C>T	ANK1	chr8	41653508	41653509	3'UTR	C	T	143.202	554.169	0.790399	no					0.651613	0.645161	0.0444444	0.0444444
chr8_56958599_56958600_-_A_G	NM_017813.4(IMPAD1):c.*5193A>G	IMPAD1	chr8	56958599	56958600	3'UTR	A	G	37.8469	25.7261	0.375324	no	71.3183	73.3837	0.899426	no	0.36129	0.367742	0.0962963	0.0962963
chr8_56963645_56963646_-_C_T	NM_017813.4(IMPAD1):c.*147C>T	IMPAD1	chr8	56963645	56963646	3'UTR	C	T					82.8154	61.3939	0.189756	no	0.412903	0.406452	0.0740741	0.0740741
chr8_67422261_67422262_-_T_C	NM_020361.4(CPA6):c.*242T>C	CPA6	chr8	67422261	67422262	3'UTR	T	C	31.7274	16.4918	0.178746	no	70.7147	74.969	0.777073	no	0.36129	0.367742	0.0740741	0.0740741
chr8_71197741_71197742_-_A_C	NM_000503.5(EYA1):c.*1598A>C	EYA1	chr8	71197741	71197742	3'UTR	A	C	11.705	17.4553	0.174073	no	98.1708	69.6353	0.180211	no	0.43871	0.445161	0.0666667	0.0666667
chr8_76980338_76980341_-_AAG_-	NM_000318.2(PEX2):c.*2920_*2922delAAG	PEX2	chr8	76980338	76980341	3'UTR	AAG	-					53.9985	76.6073	0.123684	no	0.382166	0.383117	0.080292	0.0746269
chr8_76981658_76981659_-_A_G	NM_000318.2(PEX2):c.*1602A>G	PEX2	chr8	76981658	76981659	3'UTR	A	G					84.9912	84.3881	0.973276	no	0.277419	0.283871	0.155556	0.148148
chr8_76982665_76982666_-_C_T	NM_000318.2(PEX2):c.*595C>T	PEX2	chr8	76982665	76982666	3'UTR	C	T	29.4724	68.8493	0.0713394	no	79.3633	62.2552	0.220427	no	0.522581	0.516129	0.0592593	0.0592593
chr8_86575678_86575679_-_G_C	NM_019098.4(CNGB3):c.*125G>C	CNGB3	chr8	86575678	86575679	3'UTR	G	C	83.3009	20.7143	0.0896811	no	78.6207	72.3701	0.745533	no	0.451613	0.451613	0.0666667	0.0666667
chr8_89935355_89935356_-_T_C	NM_002485.4(NBN):c.*226T>C	NBN	chr8	89935355	89935356	3'UTR	T	C	15.9534	15.0603	0.857471	no	83.9336	78.8444	0.756326	no	0.329032	0.335484	0.0888889	0.0888889
chr8_95245746_95245747_-_T_A	NM_177965.3(C8orf37):c.*1870T>A	C8orf37	chr8	95245746	95245747	3'UTR	T	A	18.1196	28.8068	0.471637	no	70.0133	70.1216	0.995191	no	0.4	0.4	0.0518519	0.0518519
chr8_95247233_95247234_-_C_T	NM_177965.3(C8orf37):c.*383C>T	C8orf37	chr8	95247233	95247234	3'UTR	C	T	31.6842	17.6953	0.441156	no	74.5838	82.7181	0.736902	no	0.458065	0.451613	0.0740741	0.0740741
chr8_96144286_96144287_-_T_C	NM_001001557.3(GDF6):c.*276T>C	GDF6	chr8	96144286	96144287	3'UTR	T	C	31.7507	74.1985	0.184254	no	73.8784	55.808	0.191568	no	0.483871	0.490323	0.0296296	0.0296296
chr8_96144291_96144291_-_-_C	NM_001001557.3(GDF6):c.*271_*272insC	GDF6	chr8	96144291	96144291	3'UTR	-	C	56.7278	33.2902	0.444335	no	69.2778	98.6317	0.100657	no	0.493506	0.496774	0.0298507	0.0296296
chr9_101360537_101360538_-_C_A	NM_001701.3(BAAT):c.*1890C>A	BAAT	chr9	101360537	101360538	3'UTR	C	A					178.82	52.5904	0.0092551	no	0.535484	0.529032	0.0296296	0.037037
chr9_101361111_101361112_-_A_C	NM_001701.3(BAAT):c.*1316A>C	BAAT	chr9	101361111	101361112	3'UTR	A	C	29.5171	42.6743	0.207396	no	93.264	78.5978	0.369582	no	0.458065	0.464516	0.0592593	0.0592593
chr9_101421540_101421541_-_T_C	NM_000035.3(ALDOB):c.*268T>C	ALDOB	chr9	101421540	101421541	3'UTR	T	C					74.8983	75.1234	0.992453	no	0.458065	0.464516	0.0518519	0.0444444
chr9_101421658_101421659_-_A_-	NM_000035.3(ALDOB):c.*150delA	ALDOB	chr9	101421658	101421659	3'UTR	A	-					63.5743	71.6575	0.450641	no	0.367742	0.37013	0.0740741	0.0746269
chr9_108867860_108867861_-_C_A	NM_003640.4(ELP1):c.*1254C>A	ELP1	chr9	108867860	108867861	3'UTR	C	A	29.9416	11.7949	0.0552538	yes	90.7614	112.793	0.468027	no	0.387097	0.380645	0.103704	0.103704
chr9_108868612_108868613_-_C_T	NM_003640.4(ELP1):c.*502C>T	ELP1	chr9	108868612	108868613	3'UTR	C	T					67.4543	53.1093	0.329111	no	0.412903	0.406452	0.0962963	0.0962963
chr9_113387623_113387624_-_A_AA	NM_000031.5(ALAD):c.*676dupA	ALAD	chr9	113387623	113387624	3'UTR	A	AA	50.5142	19.9118	0.284437	no	76.1811	91.274	0.38572	no	0.496774	0.49359	0.0518519	0.0514706
chr9_127690763_127690764_-_C_T	NM_003165.3(STXBP1):c.*17-11G>A	STXBP1	chr9	127690763	127690764	3'UTR	C	T	33.5084	30.0765	0.91448	no	162.226	100.426	0.0693432	no	0.550336	0.543624	0.0155039	0.0232558
chr9_129813071_129813074_-_ATT_-	NM_000113.2(TOR1A):c.*898_*900delATT	TOR1A	chr9	129813071	129813074	3'UTR	ATT	-					68.3826	110.649	0.0176067	no	0.401274	0.409091	0.10219	0.0970149
chr9_132262173_132262174_-_A_AA	NM_015046.6(SETX):c.*2065dup	SETX	chr9	132262173	132262174	3'UTR	A	AA	34.2347	38.4188	0.629295	no	90.0748	76.7228	0.466058	no	0.445161	0.442308	0.0444444	0.0441176
chr9_132892996_132892997_-_T_C	NM_000368.4(TSC1):c.*3238T>C	TSC1	chr9	132892996	132892997	3'UTR	T	C	17.5532	17.7427	0.9879	no	80.9659	90.4232	0.696821	no	0.516129	0.522581	0.0444444	0.0444444
chr9_132893795_132893796_-_C_A	NM_000368.4(TSC1):c.*2439C>A	TSC1	chr9	132893795	132893796	3'UTR	C	A					55.4236	66.4397	0.328165	no	0.451613	0.445161	0.0962963	0.0962963
chr9_132894715_132894716_-_C_T	NM_000368.4(TSC1):c.*1519C>T	TSC1	chr9	132894715	132894716	3'UTR	C	T	13.4387	27.8545	0.36305	no					0.419355	0.412903	0.0740741	0.0740741
chr9_136196742_136196743_-_G_A	NM_014564.4(LHX3):c.*582G>A	LHX3	chr9	136196742	136196743	3'UTR	G	A	68.7884	70.8789	0.989096	no	71.7382	81.7072	0.534801	no	0.6	0.593548	0.0296296	0.0296296
chr9_136428911_136428912_-_G_C	NM_019892.5(INPP5E):c.*763G>C	INPP5E	chr9	136428911	136428912	3'UTR	G	C	15.1514	44.7685	0.211164	no	98.976	93.8541	0.862698	no	0.509677	0.509677	0.0518519	0.0518519
chr9_14734725_14734726_-_T_A	NM_144966.5(FREM1):c.*2670T>A	FREM1	chr9	14734725	14734726	3'UTR	T	A	20.6485	10.423	0.0272768	no	100.069	71.6004	0.0594681	no	0.354839	0.354839	0.111111	0.111111
chr9_14735326_14735327_-_G_A	NM_144966.5(FREM1):c.*2069G>A	FREM1	chr9	14735326	14735327	3'UTR	G	A					82.6298	78.3024	0.881555	no	0.412903	0.406452	0.0592593	0.0592593
chr9_14736190_14736191_-_T_C	NM_144966.5(FREM1):c.*1205T>C	FREM1	chr9	14736190	14736191	3'UTR	T	C	39.5689	20.6267	0.101917	no	63.2996	80.0476	0.281139	no	0.387097	0.393548	0.0592593	0.0592593
chr9_14737385_14737386_-_A_T	NM_144966.5(FREM1):c.*10A>T	FREM1	chr9	14737385	14737386	3'UTR	A	T	47.4374	14.9622	0.0334764	yes	85.0446	73.0284	0.498239	no	0.43871	0.43871	0.0888889	0.0888889
chr9_27547658_27547659_-_G_C	NM_001256054.2(C9orf72):c.*577G>C	C9orf72	chr9	27547658	27547659	3'UTR	G	C	18.9285	37.1305	0.036218	no	88.8241	93.0574	0.838826	no	0.419355	0.419355	0.0888889	0.0888889
chr9_27548061_27548062_-_C_T	NM_001256054.2(C9orf72):c.*174C>T	C9orf72	chr9	27548061	27548062	3'UTR	C	T	33.1804	11.2895	0.0186677	yes	87.8463	94.3683	0.621635	no	0.445161	0.43871	0.0814815	0.0888889
chr9_33110735_33110736_-_G_C	NM_001497.3(B4GALT1):c.*2718G>C	B4GALT1	chr9	33110735	33110736	3'UTR	G	C	34.0224	21.0441	0.130418	no	88.478	76.1693	0.455887	no	0.406452	0.406452	0.0740741	0.0740741
chr9_33112574_33112575_-_T_C	NM_001497.3(B4GALT1):c.*879T>C	B4GALT1	chr9	33112574	33112575	3'UTR	T	C	15.1901	21.1561	0.352154	no	80.6642	86.9263	0.694601	no	0.36129	0.367742	0.111111	0.111111
chr9_33112716_33112720_-_AGAA_-	NM_001497.3(B4GALT1):c.*734_*737delAGAA	B4GALT1	chr9	33112716	33112720	3'UTR	AGAA	-	19.2408	36.8992	0.179732	no	81.6572	71.3293	0.587021	no	0.341772	0.344156	0.0942029	0.0970149
chr9_35056328_35056329_-_G_A	NM_007126.4(VCP):c.*788G>A	VCP	chr9	35056328	35056329	3'UTR	G	A	48.206	23.5653	0.389159	no	74.2281	90.1453	0.490641	no	0.529032	0.522581	0.0666667	0.0740741
chr9_35056944_35056945_-_C_G	NM_007126.4(VCP):c.*172C>G	VCP	chr9	35056944	35056945	3'UTR	C	G	52.9	32.8885	0.313064	no	74.2049	83.1142	0.569943	no	0.43871	0.43871	0.0592593	0.0592593
chr9_36214685_36214686_-_G_A	NM_005476.5(GNE):c.*2679G>A	GNE	chr9	36214685	36214686	3'UTR	G	A	27.7203	22.6513	0.670794	no	67.6693	80.0472	0.417851	no	0.43871	0.432258	0.0592593	0.0666667
chr9_36215789_36215790_-_C_T	NM_005476.5(GNE):c.*1575C>T	GNE	chr9	36215789	36215790	3'UTR	C	T	27.5367	21.0253	0.591381	no	73.4914	62.359	0.593869	no	0.419355	0.412903	0.0592593	0.0592593
chr9_37780096_37780097_-_A_C	NM_016042.3(EXOSC3):c.*582A>C	EXOSC3	chr9	37780096	37780097	3'UTR	A	C					91.9303	72.5173	0.277195	no	0.348387	0.354839	0.133333	0.125926
chr9_3824935_3824936_-_A_-	NM_001042413.1(GLIS3):c.*3336delA	GLIS3	chr9	3824935	3824936	3'UTR	A	-	32.8191	69.4862	0.403221	no	64.086	79.0327	0.129558	no	0.354839	0.357143	0.0518519	0.0447761
chr9_3826158_3826159_-_G_T	NM_001042413.1(GLIS3):c.*2113G>T	GLIS3	chr9	3826158	3826159	3'UTR	G	T	14.9615	47.1507	0.00710849	yes	70.4621	68.7165	0.915063	no	0.374194	0.367742	0.0666667	0.0666667
chr9_3826269_3826271_-_CT_-	NM_001042413.1(GLIS3):c.*2001_*2002delCT	GLIS3	chr9	3826269	3826271	3'UTR	CT	-					94.1261	64.6027	0.201839	no	0.429487	0.428571	0.0808824	0.0820896
chr9_74723726_74723727_-_C_T	NM_017662.4(TRPM6):c.*886C>T	TRPM6	chr9	74723726	74723727	3'UTR	C	T	260.399	298.848	0.944498	no	71.932	88.045	0.37786	no	0.548387	0.541935	0.037037	0.037037
chr9_91723141_91723142_-_C_T	NM_004560.3(ROR2):c.*520C>T	ROR2	chr9	91723141	91723142	3'UTR	C	T	66.4866	38.7855	0.391237	no	68.8749	99.4522	0.11996	no	0.567742	0.56129	0.0296296	0.0296296
chr9_95100881_95100882_-_C_A	NM_000136.2(FANCC):c.*825C>A	FANCC	chr9	95100881	95100882	3'UTR	C	A	29.143	68.6063	0.528278	no	75.0504	43.2317	0.0114828	no	0.574194	0.567742	0.0296296	0.0296296
chr9_95444496_95444497_-_T_C	NM_000264.4(PTCH1):c.*1896T>C	PTCH1	chr9	95444496	95444497	3'UTR	T	C	24.6576	17.6803	0.474061	no	64.2301	86.3765	0.0211586	no	0.619355	0.625806	0.0148148	0.0148148
chr9_95445769_95445770_-_C_T	NM_000264.4(PTCH1):c.*623C>T	PTCH1	chr9	95445769	95445770	3'UTR	C	T	50.5549	75.1867	0.186154	no	80.7072	88.3306	0.668923	no	0.470968	0.464516	0.037037	0.037037
chrX_120428798_120428799_-_T_C	NM_002294.2(LAMP2):c.*2524T>C	LAMP2	chrX	120428798	120428799	3'UTR	T	C					74.6502	59.3507	0.253738	no	0.4	0.406452	0.0814815	0.0814815
chrX_120430131_120430132_-_A_T	NM_002294.2(LAMP2):c.*1191A>T	LAMP2	chrX	120430131	120430132	3'UTR	A	T					75.5905	88.2794	0.536254	no	0.4	0.4	0.125926	0.118519
chrX_120430469_120430470_-_G_A	NM_002294.2(LAMP2):c.*853G>A	LAMP2	chrX	120430469	120430470	3'UTR	G	A	18.9815	16.8478	0.655633	no	94.1921	82.9378	0.54306	no	0.367742	0.36129	0.0962963	0.103704
chrX_120430601_120430602_-_A_C	NM_002294.2(LAMP2):c.*721A>C	LAMP2	chrX	120430601	120430602	3'UTR	A	C	35.8786	42.1085	0.913369	no	118.348	80.3044	0.20248	no	0.36129	0.367742	0.0814815	0.0814815
chrX_132077116_132077120_-_GTTT_-	NM_194277.2(FRMD7):c.*752_*755delGTTT	FRMD7	chrX	132077116	132077120	3'UTR	GTTT	-					90.7932	84.2389	0.741596	no	0.360759	0.363636	0.123188	0.126866
chrX_132077271_132077272_-_C_G	NM_194277.2(FRMD7):c.*600C>G	FRMD7	chrX	132077271	132077272	3'UTR	C	G	61.4135	15.95	0.0740369	no	95.6946	77.0979	0.396845	no	0.419355	0.419355	0.0814815	0.0814815
chrX_136667090_136667091_-_A_C	NM_004840.2(ARHGEF6):c.*938A>C	ARHGEF6	chrX	136667090	136667091	3'UTR	A	C	41.3845	16.2567	0.0947635	no	100.404	65.5343	0.0503179	no	0.380645	0.387097	0.111111	0.111111
chrX_136667879_136667880_-_G_A	NM_004840.2(ARHGEF6):c.*149G>A	ARHGEF6	chrX	136667879	136667880	3'UTR	G	A	73.6189	54.0593	0.344951	no	80.533	76.7409	0.795879	no	0.516129	0.509677	0.0222222	0.0222222
chrX_136667941_136667942_-_T_C	NM_004840.2(ARHGEF6):c.*87T>C	ARHGEF6	chrX	136667941	136667942	3'UTR	T	C					110.766	85.4851	0.125814	no	0.464516	0.470968	0.0148148	0.0148148
chrX_154028998_154028999_-_C_A	NM_004992.3(MECP2):c.*1368C>A	MECP2	chrX	154028998	154028999	3'UTR	C	A					152.211	76.4531	0.0277754	no	0.619355	0.612903	0.0222222	0.0222222
chrX_31120866_31120870_-_TGAT_TGATTGAT	NM_004006.2(DMD):c.*1049_*1052dupTGAT	DMD	chrX	31120866	31120870	3'UTR	TGAT	TGATTGAT					90.7216	55.7662	0.0482204	no	0.424051	0.419753	0.0724638	0.0704225
chrX_31121426_31121430_-_CACA_CACACACA	NM_004006.2(DMD):c.*489_*492dupCACA	DMD	chrX	31121426	31121430	3'UTR	CACA	CACACACA					83.0654	59.404	0.143612	no	0.411392	0.41358	0.057971	0.056338
chrX_31121441_31121442_-_T_C	NM_004006.2(DMD):c.*477T>C	DMD	chrX	31121441	31121442	3'UTR	T	C	33.0039	48.7079	0.416105	no	71.4652	53.9955	0.194807	no	0.412903	0.419355	0.0444444	0.037037
chrX_72579726_72579727_-_A_G	NM_002637.3(PHKA1):c.*1275A>G	PHKA1	chrX	72579726	72579727	3'UTR	A	G	27.6274	47.1308	0.303736	no	73.1307	55.9441	0.171145	no	0.4	0.406452	0.0888889	0.0888889
chrX_80671094_80671095_-_T_C	NM_153252.4(BRWD3):c.*5514T>C	BRWD3	chrX	80671094	80671095	3'UTR	T	C					69.8224	67.4465	0.865599	no	0.387097	0.393548	0.118519	0.111111
chr1_109608606_109608607_+_C_T	NM_005272.3(GNAT2):c.461+24G>A	GNAT2	chr1	109608606	109608607	3'UTR	C	T	16.1736	39.6898	0.141338	no	74.4776	89.5478	0.38512	no	0.496774	0.490323	0.0592593	0.0666667
chr1_11022736_11022737_+_T_C	NM_007375.3(TARDBP):c.*83T>C	TARDBP	chr1	11022736	11022737	3'UTR	T	C					73.3954	89.0036	0.358071	no	0.348387	0.354839	0.111111	0.103704
chr1_11023350_11023351_+_G_A	(G-A)_+697_to_termination_codon	TARDBP	chr1	11023350	11023351	3'UTR	G	A	22.8097	34.0776	0.181052	no					0.496774	0.490323	0.0592593	0.0592593
chr11_31664396_31664397_+_C_A	NM_019040.4(ELP4):c.1143+14176C>A	ELP4	chr11	31664396	31664397	3'UTR	C	A	106.545	24.1637	0.061379	yes	71.9254	55.3675	0.319253	no	0.445161	0.43871	0.0518519	0.0592593
chr1_145927327_145927328_+_C_G	NM_005105.4(RBM8A):c.67+32G>C	RBM8A	chr1	145927327	145927328	3'UTR	C	G	12.5608	13.8097	0.848586	no	75.248	78.9137	0.839484	no	0.529032	0.529032	0.0518519	0.0518519
chr1_145927446_145927447_+_C_T	NM_005105.4(RBM8A):c.-21G>A	RBM8A	chr1	145927446	145927447	3'UTR	C	T	26.959	18.8482	0.575441	no	87.0503	122.102	0.208382	no	0.593548	0.587097	0.037037	0.037037
chr11_46739504_46739505_+_G_A	NM_000506.4(F2):c.*97G>A	F2	chr11	46739504	46739505	3'UTR	G	A					57.3326	70.374	0.325662	no	0.471429	0.464286	0.0583333	0.0583333
chr1_156058393_156058394_+_C_A	(C-A)_+23_to_termination_codon	LAMTOR2	chr1	156058393	156058394	3'UTR	C	A	30.3613	59.1486	0.286259	no	74.923	98.3613	0.228308	no	0.522581	0.516129	0.0296296	0.037037
chr12_108567649_108567650_+_G_C	NM_213595.3(ISCU):c.418+382G>C	ISCU	chr12	108567649	108567650	3'UTR	G	C	49.7959	25.8776	0.550065	no	80.0061	84.8141	0.795642	no	0.470968	0.470968	0.0444444	0.0444444
chr1_25816824_25816825_+_T_C	(T-C)_+1107_to_termination_codon	SELENON	chr1	25816824	25816825	3'UTR	T	C	26.0499	19.8296	0.714766	no	79.5999	88.1707	0.714126	no	0.567742	0.574194	0.0296296	0.0296296
chr14_20694009_20694010_+_C_T	(C-T)_+2_to_termination_codon	ANG	chr14	20694009	20694010	3'UTR	C	T	14.674	268.278	1.40821e-07	yes	79.6411	90.054	0.654502	no	0.574194	0.567742	0.0222222	0.0296296
chr14_20694013_20694014_+_G_A	(G-A)_+6_to_termination_codon	ANG	chr14	20694013	20694014	3'UTR	G	A	14.674	14.6102	0.984119	no	79.6411	53.2709	0.114063	no	0.574194	0.567742	0.0222222	0.0222222
chr14_50913027_50913028_+_C_T	NM_002863.4(PYGL):c.1620+1G>A	PYGL	chr14	50913027	50913028	3'UTR	C	T					58.9719	73.5345	0.315535	no	0.574194	0.567742	0.0222222	0.0222222
chr15_72346525_72346526_+_C_T	NM_000520.5(HEXA):c.1330+1G>A	HEXA	chr15	72346525	72346526	3'UTR	C	T	28.2407	147.812	0.167084	no	81.3861	83.8038	0.882917	no	0.529032	0.522581	0.0518519	0.0518519
chr15_72351131_72351132_+_C_T	NM_000520.5(HEXA):c.672+1G>A	HEXA	chr15	72351131	72351132	3'UTR	C	T					58.6675	73.1058	0.307953	no	0.477419	0.470968	0.0444444	0.0444444
chr16_17138533_17138534_+_G_A	NM_022166.3(XYLT1):c.1588-3C>T	XYLT1	chr16	17138533	17138534	3'UTR	G	A	35.7183	17.7799	0.316536	no					0.6	0.593548	0.0222222	0.0296296
chr16_173646_173647_+_G_C	(G-C)_+47_to_termination_codon	HBA2	chr16	173646	173647	3'UTR	G	C	174.393	196.867	0.932324	no	86.3611	73.4367	0.436239	no	0.626667	0.626667	0.0307692	0.0307692
chr16_173691_173692_+_A_G	(A-G)_+92_to_termination_codon	HBA2	chr16	173691	173692	3'UTR	A	G	174.393	70.7609	0.370625	no	86.3611	86.3679	0.999704	no	0.626667	0.633333	0.0307692	0.0230769
chr16_173692_173694_+_AA_-	NM_000517.4(HBA2):c.*93_*94delAA	HBA2	chr16	173692	173694	3'UTR	AA	-	174.393	180.595	0.989485	no	86.3611	92.1381	0.751586	no	0.626667	0.635135	0.0307692	0.03125
chr16_173693_173694_+_A_C	(A-C)_+94_to_termination_codon	HBA2	chr16	173693	173694	3'UTR	A	C	174.393	69.7429	0.318979	no	86.3611	110.836	0.230943	no	0.626667	0.633333	0.0307692	0.0307692
chr16_173693_173694_+_A_G	(A-G)_+94_to_termination_codon	HBA2	chr16	173693	173694	3'UTR	A	G	174.393	45.1196	0.0565232	yes	86.3611	99.1194	0.512674	no	0.626667	0.633333	0.0307692	0.0307692
chr16_173703_173704_+_G_T	(G-T)_+104_to_termination_codon	HBA2	chr16	173703	173704	3'UTR	G	T	174.393	80.3172	0.209767	no	86.3611	100.428	0.465147	no	0.626667	0.62	0.0307692	0.0307692
chr16_23624007_23624008_+_C_A	NM_024675.3(PALB2):c.2834+1G>T	PALB2	chr16	23624007	23624008	3'UTR	C	A					73.2488	67.0987	0.709009	no	0.432258	0.425806	0.0518519	0.0518519
chr16_29814466_29814467_+_T_TT	ins_1_bp_non-coding_DNA_c.1012+2dupT	PRRT2	chr16	29814466	29814467	3'UTR	T	TT					112.596	109.18	0.925607	no	0.6	0.596154	0.0296296	0.0294118
chr16_31191485_31191486_+_G_A	(G-A)_+48_to_termination_codon	FUS	chr16	31191485	31191486	3'UTR	G	A	65.7286	21.5649	0.108155	no	85.4412	65.5441	0.183064	no	0.483871	0.477419	0.0592593	0.0592593
chr16_31191496_31191497_+_G_A	(G-A)_+59_to_termination_codon	FUS	chr16	31191496	31191497	3'UTR	G	A	53.4396	133.862	0.112644	no	81.7406	80.8336	0.956997	no	0.490323	0.483871	0.0592593	0.0592593
chr16_31191545_31191546_+_C_T	(C-T)_+108_to_termination_codon	FUS	chr16	31191545	31191546	3'UTR	C	T	28.5119	12.054	0.0199181	yes					0.412903	0.406452	0.0962963	0.0962963
chr16_31191547_31191548_+_G_A	(G-A)_+110_to_termination_codon	FUS	chr16	31191547	31191548	3'UTR	G	A	42.3402	21.852	0.0889995	no	73.1403	75.7279	0.8721	no	0.412903	0.406452	0.0888889	0.0888889
chr16_31191569_31191570_+_C_A	(C-A)_+132_to_termination_codon	FUS	chr16	31191569	31191570	3'UTR	C	A	26.3635	38.399	0.565202	no	57.714	70.0551	0.36895	no	0.419355	0.412903	0.0740741	0.0740741
chr16_31191627_31191628_+_C_A	(C-A)_+190_to_termination_codon	FUS	chr16	31191627	31191628	3'UTR	C	A	34.1793	42.8769	0.693361	no	75.1573	83.7209	0.584836	no	0.445161	0.43871	0.0444444	0.0518519
chr16_89739289_89739290_+_C_T	NM_000135.2(FANCA):c.4011-1G>A	FANCA	chr16	89739289	89739290	3'UTR	C	T					79.3161	69.9211	0.714564	no	0.509677	0.503226	0.0592593	0.0592593
chr17_28402321_28402322_+_C_T	NM_080669.5(SLC46A1):c.1082-1G>A	SLC46A1	chr17	28402321	28402322	3'UTR	C	T					80.8055	53.2672	0.0140965	no	0.522581	0.516129	0.037037	0.037037
chr17_32489873_32489874_+_C_G	(C-G)_+1330_to_termination_codon	CDK5R1	chr17	32489873	32489874	3'UTR	C	G					79.4819	73.1241	0.734631	no	0.56129	0.56129	0.0222222	0.0222222
chr17_4901640_4901641_+_C_T	NM_000080.3(CHRNE):c.501-16G>A	CHRNE	chr17	4901640	4901641	3'UTR	C	T	19.1661	45.0121	0.00799385	yes					0.632258	0.625806	0.0222222	0.0222222
chr17_4902215_4902216_+_C_T	NM_000080.3(CHRNE):c.344+1G>A	CHRNE	chr17	4902215	4902216	3'UTR	C	T					70.8922	90.3083	0.269019	no	0.612903	0.606452	0.0148148	0.0148148
chr18_6956767_6956780_+_AGGTAGAAACAAG_-	NM_005559.3(LAMA1):c.7965-15_7965-3del	LAMA1	chr18	6956767	6956780	3'UTR	AGGTAGAAACAAG	-					78.5826	59.5846	0.268496	no	0.461078	0.467532	0.0408163	0.0373134
chr19_11131358_11131359_+_G_A	(G-A)_+43_to_termination_codon	LDLR	chr19	11131358	11131359	3'UTR	G	A					68.1307	85.0916	0.344511	no	0.516129	0.509677	0.0444444	0.0444444
chr19_35746705_35746706_+_A_G	NM_172341.3(PSENEN):c.167-2A>G	PSENEN	chr19	35746705	35746706	3'UTR	A	G	14.3742	170.271	0.00022477	yes	79.3801	83.025	0.881391	no	0.574194	0.580645	0.0222222	0.0222222
chr19_41424830_41424831_+_T_A	(T-A)_+223_to_termination_codon	BCKDHA	chr19	41424830	41424831	3'UTR	T	A	17.8845	31.1951	0.60089	no	85.6554	80.4505	0.810459	no	0.574194	0.574194	0.0296296	0.0296296
chr2_121530886_121530887_+_C_T	NR_023343.1(RNU4ATAC):n.8C>T	RNU4ATAC	chr2	121530886	121530887	3'UTR	C	T	75.9801	31.3858	0.289434	no	66.4241	70.6232	0.750044	no	0.503226	0.496774	0.0592593	0.0592593
chr2_121530891_121530892_+_C_T	NR_023343.1(RNU4ATAC):n.13C>T	RNU4ATAC	chr2	121530891	121530892	3'UTR	C	T	75.9801	27.9853	0.314989	no	66.4241	65.1784	0.911054	no	0.503226	0.496774	0.0592593	0.0592593
chr2_121530894_121530895_+_G_A	NR_023343.1(RNU4ATAC):n.16G>A	RNU4ATAC	chr2	121530894	121530895	3'UTR	G	A	75.9801	152.047	0.611458	no	66.4241	67.7747	0.915232	no	0.503226	0.496774	0.0592593	0.0666667
chr2_121530908_121530909_+_G_A	NR_023343.1(RNU4ATAC):r.30G>A	RNU4ATAC	chr2	121530908	121530909	3'UTR	G	A					66.4241	57.5223	0.313675	no	0.503226	0.496774	0.0592593	0.0666667
chr2_121530915_121530916_+_G_A	NR_023343.1(RNU4ATAC):n.37G>A	RNU4ATAC	chr2	121530915	121530916	3'UTR	G	A	75.9801	15.6118	0.0252948	yes	66.4241	109.05	0.014653	no	0.503226	0.496774	0.0592593	0.0666667
chr2_121530926_121530927_+_G_A	NR_023343.1(RNU4ATAC):n.48G>A	RNU4ATAC	chr2	121530926	121530927	3'UTR	G	A	75.9801	57.2178	0.723435	no	66.4241	71.8657	0.662175	no	0.503226	0.496774	0.0592593	0.0666667
chr2_121530928_121530929_+_G_A	NR_023343.1(RNU4ATAC):n.50G>A	RNU4ATAC	chr2	121530928	121530929	3'UTR	G	A	75.9801	22.1027	0.0560292	yes	66.4241	61.3616	0.663721	no	0.503226	0.496774	0.0592593	0.0592593
chr2_121530928_121530929_+_G_C	NR_023343.1(RNU4ATAC):n.50G>C	RNU4ATAC	chr2	121530928	121530929	3'UTR	G	C	75.9801	45.6287	0.351814	no	66.4241	85.5217	0.165651	no	0.503226	0.503226	0.0592593	0.0592593
chr2_121530929_121530930_+_G_A	NR_023343.1(RNU4ATAC):n.51G>A	RNU4ATAC	chr2	121530929	121530930	3'UTR	G	A	75.9801	45.7296	0.441344	no	66.4241	79.0388	0.315562	no	0.503226	0.496774	0.0592593	0.0592593
chr2_121530931_121530932_+_C_G	NR_023343.1(RNU4ATAC):n.53C>G	RNU4ATAC	chr2	121530931	121530932	3'UTR	C	G	75.9801	10.7403	0.0102381	yes	66.4241	58.4094	0.545472	no	0.503226	0.503226	0.0592593	0.0592593
chr2_121530933_121530934_+_G_A	NR_023343.1(RNU4ATAC):n.55G>A	RNU4ATAC	chr2	121530933	121530934	3'UTR	G	A	75.9801	39.2023	0.274242	no					0.503226	0.496774	0.0592593	0.0592593
chr2_121530944_121530945_+_G_C	NR_023343.1(RNU4ATAC):n.66G>C	RNU4ATAC	chr2	121530944	121530945	3'UTR	G	C	27.7105	9.34721	0.0367317	yes	71.7464	69.5772	0.898476	no	0.483871	0.483871	0.0592593	0.0592593
chr2_121530989_121530990_+_G_A	NR_023343.1(RNU4ATAC):n.111G>A	RNU4ATAC	chr2	121530989	121530990	3'UTR	G	A					106.925	42.0863	5.90154e-06	yes	0.483871	0.477419	0.0592593	0.0666667
chr2_121530996_121530997_+_T_C	NR_023343.1(RNU4ATAC):n.118T>C	RNU4ATAC	chr2	121530996	121530997	3'UTR	T	C	19.9115	8.23289	0.0194323	yes	106.925	104.217	0.891181	no	0.483871	0.490323	0.0592593	0.0592593
chr2_121531002_121531003_+_G_A	NR_023343.1(RNU4ATAC):n.124G>A	RNU4ATAC	chr2	121531002	121531003	3'UTR	G	A	19.9115	14.2075	0.552036	no	106.925	96.1312	0.666697	no	0.483871	0.477419	0.0592593	0.0592593
chr2_127429018_127429019_+_C_T	(C-T)_+73_to_termination_codon	PROC	chr2	127429018	127429019	3'UTR	C	T	95.3787	66.8005	0.537119	no	62.8671	83.7547	0.117132	no	0.522581	0.516129	0.037037	0.037037
chr21_44331841_44331842_+_C_T	NM_004928.2(C21orf2):c.545+1G>A	C21orf2	chr21	44331841	44331842	3'UTR	C	T	12.8223	28.9182	0.136095	no	79.9413	83.6812	0.868552	no	0.677419	0.670968	0.0148148	0.0148148
chr2_178538944_178538945_+_C_T	NM_001256850.1(TTN):c.94066+1G>A	TTN	chr2	178538944	178538945	3'UTR	C	T					82.3695	62.4625	0.117862	no	0.458065	0.451613	0.0444444	0.0444444
chr2_178576416_178576417_+_C_A	NM_001256850.1(TTN):c.64793-1G>T	TTN	chr2	178576416	178576417	3'UTR	C	A	84.143	26.5159	0.022566	yes	81.6485	85.2839	0.86701	no	0.425806	0.419355	0.0592593	0.0666667
chr2_178580229_178580230_+_C_G	NM_001256850.1(TTN):c.62135-1G>C	TTN	chr2	178580229	178580230	3'UTR	C	G					70.2008	91.1744	0.245002	no	0.387097	0.387097	0.111111	0.111111
chr22_23834249_23834250_+_C_T	(C-T)_+70_to_termination_codon	SMARCB1	chr22	23834249	23834250	3'UTR	C	T					87.7961	91.8569	0.797835	no	0.625806	0.619355	0.0148148	0.0222222
chr22_23834261_23834262_+_C_T	(C-T)_+82_to_termination_codon	SMARCB1	chr22	23834261	23834262	3'UTR	C	T	191.415	14.3584	0.0178817	yes					0.619355	0.612903	0.0148148	0.0148148
chr22_37974199_37974200_+_T_G	NM_006941.3(SOX10):c.698-2A>C	SOX10	chr22	37974199	37974200	3'UTR	T	G	65.7837	10.9539	0.149117	no	53.9888	81.6552	0.205046	no	0.612903	0.619355	0.0296296	0.0296296
chr2_46907808_46907809_+_C_T	NM_001171507.2(MCFD2):c.309+1G>A	MCFD2	chr2	46907808	46907809	3'UTR	C	T					67.0065	78.4375	0.591258	no	0.477419	0.470968	0.0592593	0.0592593
chr3_10149971_10149972_+_C_G	(C-G)_+7_to_termination_codon	VHL	chr3	10149971	10149972	3'UTR	C	G	30.3756	50.9681	0.322094	no	81.9224	78.4819	0.850338	no	0.425806	0.425806	0.0518519	0.0518519
chr3_15645646_15645647_+_G_A	(G-A)_+159_to_termination_codon	BTD	chr3	15645646	15645647	3'UTR	G	A	8.54632	21.8946	0.137649	no	134.193	67.6698	0.0371198	no	0.516129	0.509677	0.0444444	0.0444444
chr4_54295305_54295306_+_G_A	(G-A)_+34_to_termination_codon	PDGFRA	chr4	54295305	54295306	3'UTR	G	A	57.7125	27.8255	0.471996	no	52.9146	85.8267	0.0634667	no	0.516129	0.509677	0.0296296	0.0296296
chr5_75598083_75598084_+_T_C	NM_016218.3(POLK):c.*66T>C	POLK	chr5	75598083	75598084	3'UTR	T	C					78.7006	84.4246	0.790601	no	0.322581	0.329032	0.0962963	0.0962963
chr6_1612840_1612841_+_A_T	NM_001453.2(FOXC1):c.*734A>T	FOXC1	chr6	1612840	1612841	3'UTR	A	T					64.1205	55.4701	0.684911	no	0.329032	0.329032	0.118519	0.118519
chr6_32041146_32041147_+_G_A	(G-A)_+13_to_termination_codon	CYP21A2	chr6	32041146	32041147	3'UTR	G	A					97.6484	63.9489	0.156521	no	0.587097	0.580645	0.0444444	0.0444444
chr6_7585886_7585887_+_T_A	(T-A)_+9_to_termination_codon	DSP	chr6	7585886	7585887	3'UTR	T	A					71.9341	85.771	0.426063	no	0.406452	0.406452	0.103704	0.111111
chr7_117668150_117668151_+_A_C	(A-C)_+1043_to_termination_codon	CFTR	chr7	117668150	117668151	3'UTR	A	C	17.182	20.9446	0.572771	no	71.4189	87.4509	0.365311	no	0.393548	0.4	0.0888889	0.0888889
chr7_74789338_74789339_+_G_A	NM_000265.5(NCF1):c.*154+25G>A	NCF1	chr7	74789338	74789339	3'UTR	G	A					55.4448	72.5461	0.214102	no	0.6	0.593548	0.037037	0.037037
chr8_103331528_103331529_+_C_T	(C-T)_+20_to_termination_codon	FZD6	chr8	103331528	103331529	3'UTR	C	T					69.935	79.5044	0.63852	no	0.412903	0.406452	0.0592593	0.0592593
chr8_11759326_11759327_+_G_A	NM_002052.4(GATA4):c.*852G>A	GATA4	chr8	11759326	11759327	3'UTR	G	A					72.4915	87.9038	0.45975	no	0.554839	0.548387	0.0296296	0.0296296
chr8_11759642_11759643_+_T_C	NM_002052.4(GATA4):c.*1168T>C	GATA4	chr8	11759642	11759643	3'UTR	T	C					83.8667	55.4323	0.214767	no	0.580645	0.587097	0.0222222	0.0222222
chr8_11759730_11759731_+_A_T	NM_002052.4(GATA4):c.*1256A>T	GATA4	chr8	11759730	11759731	3'UTR	A	T	81.4108	83.2571	0.969469	no	87.3842	82.3424	0.782545	no	0.548387	0.548387	0.037037	0.037037
chr8_22201443_22201444_+_T_C	NM_001199.3(BMP1):c.*241T>C	BMP1	chr8	22201443	22201444	3'UTR	T	C	9.64145	66.134	0.00119642	yes	47.4652	79.1074	0.00673229	no	0.574194	0.580645	0.0296296	0.0222222
chrM_2938_2939_+_C_A	m.2939C>A	MT-RNR2	chrM	2938	2939	3'UTR	C	A	27.0861	22.4453	0.756283	no	65.9665	111.901	0.0134579	no	0.445161	0.43871	0.103704	0.103704
chrM_2990_2991_+_T_C	m.2991T>C	MT-RNR2	chrM	2990	2991	3'UTR	T	C	30.8416	33.7137	0.942113	no					0.477419	0.483871	0.0740741	0.0740741
chrM_826_827_+_A_G	m.827A>G	MT-RNR1	chrM	826	827	3'UTR	A	G	198.33	12.7116	0.023642	yes	65.9138	106.464	0.0845347	no	0.470968	0.477419	0.0888889	0.0888889
chrX_120256560_120256561_+_T_G	(T-G)_+1127_to_termination_codon	ZBTB33	chrX	120256560	120256561	3'UTR	T	G					99.2699	80.6984	0.405363	no	0.367742	0.374194	0.111111	0.103704
chrX_139563227_139563228_+_A_G	(A-G)_+1157_to_termination_codon	F9	chrX	139563227	139563228	3'UTR	A	G					54.9064	75.0808	0.36801	no	0.503226	0.509677	0.0592593	0.0592593
chrX_139563438_139563439_+_A_G	(A-G)_+1368_to_termination_codon	F9	chrX	139563438	139563439	3'UTR	A	G	31.232	36.1117	0.819416	no	88.3294	92.5714	0.771291	no	0.406452	0.412903	0.0740741	0.0666667
chrX_147949589_147949590_+_T_C	(T-C)_+746_to_termination_codon	FMR1	chrX	147949589	147949590	3'UTR	T	C	35.7386	52.9716	0.336502	no	73.6407	79.2129	0.767868	no	0.354839	0.36129	0.0888889	0.0888889
chrX_152869244_152869245_+_C_T	(C-T)_+129_to_termination_codon	NSDHL	chrX	152869244	152869245	3'UTR	C	T					43.0115	99.4057	0.00883963	no	0.503226	0.496774	0.037037	0.037037
chrX_22247941_22247955_+_CGACTCTGGTAGCT_-	NM_000444.5(PHEX):c.2239_*2delCGACTCTGGTAGCT	PHEX	chrX	22247941	22247955	3'UTR	CGACTCTGGTAGCT	-					151.793	75.9246	0.0395017	no	0.547619	0.545455	0.0337838	0.0298507
chrX_22248183_22248184_+_A_G	(A-G)_+231_to_termination_codon	PHEX	chrX	22248183	22248184	3'UTR	A	G	12.5772	21.2284	0.275127	no	70.0114	92.2968	0.221009	no	0.341935	0.348387	0.118519	0.118519
chrX_48824893_48824894_+_A_T	(A-T)_+282_to_termination_codon	HDAC6	chrX	48824893	48824894	3'UTR	A	T	16.6404	32.087	0.193062	no	52.8582	73.4935	0.0882907	no	0.56129	0.56129	0.0444444	0.0444444
chr10_43128273_43128277_+_TCTT_AAA	del_4_bp_/_ins_3_bp_non-coding_DNA_c.*5_*8delTCTTinsAAA	RET	chr10	43128273	43128277	3'UTR	TCTT	AAA					71.3307	69.1909	0.8996	no	0.5	0.496815	0.0289855	0.0364964
chr10_70435284_70435285_+_C_T	NM_018055.4(NODAL):c.891+1G>A	NODAL	chr10	70435284	70435285	3'UTR	C	T	30.9342	15.4942	0.44167	no	74.1525	58.5362	0.195752	no	0.593548	0.587097	0.037037	0.037037
chr10_71815381_71815382_+_G_C	NM_022124.5(CDH23):c.*104G>C	CDH23;PSAP	chr10	71815381	71815382	3'UTR	G	C	72.4527	12.972	0.0264673	yes	97.5393	95.2972	0.943094	no	0.664516	0.664516	0.0148148	0.0148148
chr10_71815792_71815793_+_C_A	NM_022124.5(CDH23):c.*515C>A	CDH23;PSAP	chr10	71815792	71815793	3'UTR	C	A	157.65	37.2578	0.527557	no	82.4072	102.004	0.372974	no	0.522581	0.516129	0.0148148	0.0148148
chr10_71815865_71815866_+_A_-	NM_022124.5(CDH23):c.*588delA	CDH23;PSAP	chr10	71815865	71815866	3'UTR	A	-	35.7203	81.6771	0.0684312	no	73.0901	76.3315	0.827498	no	0.464516	0.467532	0.0296296	0.0298507
chr10_86687234_86687235_+_G_A	NM_007078.2(LDB3):c.690-4661G>A	LDB3	chr10	86687234	86687235	3'UTR	G	A	94.6972	23.6404	0.25723	no	86.5663	73.9461	0.564304	no	0.574194	0.567742	0.0296296	0.0296296
chr10_87965481_87965482_+_T_-	NM_000314.6(PTEN):c.*10delT	PTEN	chr10	87965481	87965482	3'UTR	T	-					90.4994	88.9311	0.940677	no	0.348387	0.350649	0.0814815	0.0820896
chr10_88935366_88935367_+_C_G	NM_001613.2(ACTA2):c.991-1G>C	ACTA2	chr10	88935366	88935367	3'UTR	C	G					73.3886	82.3429	0.541449	no	0.496774	0.496774	0.0444444	0.0444444
chr1_109605964_109605965_+_C_G	NM_005272.3(GNAT2):c.720+5G>C	GNAT2	chr1	109605964	109605965	3'UTR	C	G					144.083	74.4765	0.0145013	no	0.516129	0.516129	0.0444444	0.0444444
chr1_11022657_11022658_+_G_A	(G-A)_+4_to_termination_codon	TARDBP	chr1	11022657	11022658	3'UTR	G	A					80.5777	100.357	0.283247	no	0.374194	0.367742	0.0962963	0.0962963
chr11_112094875_112094876_+_T_-	NM_003002.3(SDHD):c.386delT	SDHD	chr11	112094875	112094876	3'UTR	T	-	13.6573	51.8059	0.0192118	yes	89.8141	80.9731	0.527403	no	0.490323	0.493506	0.0518519	0.0522388
chr1_15446671_15446672_+_T_C	(T-C)_+83_to_termination_codon	CTRC	chr1	15446671	15446672	3'UTR	T	C	12.7867	177.287	0.0292615	yes					0.541935	0.548387	0.0296296	0.0296296
chr1_15446674_15446675_+_A_G	(A-G)_+86_to_termination_codon	CTRC	chr1	15446674	15446675	3'UTR	A	G	187.852	76.3771	0.115877	no	67.9603	83.5614	0.348417	no	0.541935	0.548387	0.0296296	0.0296296
chr1_16057186_16057187_+_G_C	(C-G)_+271_to_termination_codon	CLCNKB	chr1	16057186	16057187	3'UTR	G	C					72.54	73.0806	0.974419	no	0.503226	0.503226	0.037037	0.037037
chr1_161362510_161362511_+_G_A	NM_003001.3(SDHC):c.*78G>A	SDHC	chr1	161362510	161362511	3'UTR	G	A	82.4988	22.2353	0.079556	no	78.2827	70.9617	0.566859	no	0.412903	0.406452	0.0666667	0.0666667
chr11_61398296_61398297_+_A_G	NM_001173991.2(TMEM216):c.*21A>G	TMEM216	chr11	61398296	61398297	3'UTR	A	G	130.286	75.361	0.778391	no	71.6114	86.4056	0.450537	no	0.516129	0.522581	0.0444444	0.0444444
chr11_6619432_6619433_+_G_C	NM_000391.3(TPP1):c.-33C>G	TPP1	chr11	6619432	6619433	3'UTR	G	C	26.2868	25.508	0.963381	no	74.2381	58.9328	0.277092	no	0.535484	0.535484	0.0592593	0.0592593
chr11_6619439_6619440_+_A_G	NM_000391.3(TPP1):c.-40T>C	TPP1	chr11	6619439	6619440	3'UTR	A	G	24.7919	38.9049	0.454147	no	72.9446	70.3073	0.863348	no	0.548387	0.554839	0.0666667	0.0666667
chr1_193250723_193250724_+_C_A	(C-A)_+12_to_termination_codon	CDC73	chr1	193250723	193250724	3'UTR	C	A	46.6522	13.7014	0.0380077	yes	78.5044	57.8713	0.0701633	no	0.367742	0.36129	0.0666667	0.0740741
chr1_197008850_197008851_+_G_T	(G-T)_+168_to_termination_codon	CFHR5	chr1	197008850	197008851	3'UTR	G	T					89.7449	52.6904	0.0839596	no	0.374194	0.367742	0.103704	0.111111
chr11_9808899_9808900_+_C_T	NM_030962.3(SBF2):c.4257+1G>A	SBF2	chr11	9808899	9808900	3'UTR	C	T					95.7696	53.5843	0.0657899	no	0.387097	0.380645	0.0814815	0.0814815
chr12_112505841_112505842_+_C_T	NM_002834.4(PTPN11):c.*50C>T	PTPN11	chr12	112505841	112505842	3'UTR	C	T					54.4805	112.563	0.0206566	no	0.43871	0.432258	0.0444444	0.0444444
chr12_123707757_123707758_+_G_A	NM_024809.4(TCTN2):c.*45G>A	ATP6V0A2;TCTN2	chr12	123707757	123707758	3'UTR	G	A	91.7395	71.6786	0.582946	no	84.5195	80.8976	0.813913	no	0.509677	0.503226	0.0222222	0.0296296
chr1_212619560_212619561_+_C_T	(C-T)_+6_to_termination_codon	ATF3	chr1	212619560	212619561	3'UTR	C	T	17.0896	45.0893	0.205149	no	61.7425	94.8162	0.0197612	no	0.477419	0.470968	0.0592593	0.0592593
chr1_215900910_215900911_+_G_A	NM_206933.2(USH2A):c.7301-6C>T	USH2A	chr1	215900910	215900911	3'UTR	G	A					69.5478	86.3147	0.622819	no	0.503226	0.496774	0.0296296	0.0296296
chr12_4662639_4662640_+_G_A	NM_005002.4(NDUFA9):c.655+5G>A	NDUFA9	chr12	4662639	4662640	3'UTR	G	A	25.9378	15.2652	0.192303	no	80.1227	100.527	0.221178	no	0.456954	0.450331	0.0687023	0.0687023
chr13_113549805_113549806_+_G_A	(G-A)_+268_to_termination_codon	TMCO3	chr13	113549805	113549806	3'UTR	G	A	30.4652	21.4634	0.345385	no	87.4663	74.8247	0.462479	no	0.432258	0.425806	0.0666667	0.0666667
chr13_99986259_99986260_+_T_A	(T-A)_+578_to_termination_codon	ZIC2	chr13	99986259	99986260	3'UTR	T	A					58.7554	66.5794	0.557856	no	0.367742	0.367742	0.0962963	0.0962963
chr13_99986517_99986518_+_C_T	(C-T)_+836_to_termination_codon	ZIC2	chr13	99986517	99986518	3'UTR	C	T	20.4546	20.9089	0.977453	no	64.2814	74.2976	0.528632	no	0.412903	0.406452	0.103704	0.103704
chr13_99986570_99986571_+_T_C	(T-C)_+889_to_termination_codon	ZIC2	chr13	99986570	99986571	3'UTR	T	C					77.4416	68.2348	0.608998	no	0.354839	0.36129	0.133333	0.125926
chr13_99986580_99986581_+_A_G	(A-G)_+899_to_termination_codon	ZIC2	chr13	99986580	99986581	3'UTR	A	G					110.487	71.393	0.112707	no	0.341935	0.348387	0.148148	0.140741
chr13_99986635_99986636_+_T_A	(T-A)_+954_to_termination_codon	ZIC2	chr13	99986635	99986636	3'UTR	T	A					91.13	73.9496	0.369383	no	0.329032	0.329032	0.125926	0.118519
chr13_99986647_99986648_+_A_G	(A-G)_+966_to_termination_codon	ZIC2	chr13	99986647	99986648	3'UTR	A	G					88.3325	84.8299	0.844887	no	0.341935	0.348387	0.103704	0.103704
chr14_20457509_20457510_+_A_T	(A-T)_+2_to_termination_codon	APEX1	chr14	20457509	20457510	3'UTR	A	T					62.6464	86.3795	0.157022	no	0.43871	0.43871	0.0740741	0.0740741
chr14_23415361_23415362_+_G_A	NM_000257.3(MYH7):c.5283+19C>T	MYH7	chr14	23415361	23415362	3'UTR	G	A	11.0917	19.538	0.350204	no					0.580645	0.574194	0.0222222	0.0222222
chr1_45015500_45015501_+_G_A	(G-A)_+3_to_termination_codon	UROD	chr1	45015500	45015501	3'UTR	G	A					74.2503	72.3029	0.917136	no	0.419355	0.412903	0.0814815	0.0888889
chr14_65093705_65093706_+_A_T	NM_002382.4(MAX):c.171+2T>A	MAX	chr14	65093705	65093706	3'UTR	A	T	47.8756	101.938	0.230337	no	81.8047	86.8552	0.717768	no	0.509677	0.509677	0.037037	0.037037
chr1_55063658_55063659_+_C_T	NM_174936.3(PCSK9):c.*75C>T	PCSK9	chr1	55063658	55063659	3'UTR	C	T	70.9873	14.7135	0.0877821	no					0.606452	0.6	0.0222222	0.0222222
chr15_89316835_89316836_+_T_C	NM_002693.2(POLG):c.3644-9A>G	FANCI;POLG	chr15	89316835	89316836	3'UTR	T	C					44.7365	87.7641	0.00509965	no	0.464516	0.470968	0.0592593	0.0518519
chr15_89316842_89316843_+_A_G	NM_001113378.1(FANCI):c.*384A>G	FANCI;POLG	chr15	89316842	89316843	3'UTR	A	G					70.8861	102.603	0.151207	no	0.458065	0.464516	0.0592593	0.0592593
chr15_98959867_98959868_+_A_-	NM_000875.4(IGF1R):c.*2426delA	IGF1R	chr15	98959867	98959868	3'UTR	A	-					63.3724	57.3108	0.602544	no	0.36129	0.363636	0.103704	0.104478
chr16_15732552_15732558_+_AAAAGC_-	NM_002474.2(MYH11):c.3651+6_3651+11delGCTTTT	MYH11	chr16	15732552	15732558	3'UTR	AAAAGC	-	28.0737	40.9584	0.32607	no	73.6741	78.4551	0.780782	no	0.49375	0.5	0.0428571	0.0447761
chr16_15732552_15732559_+_AAAAGCA_C	NM_001040113.1(MYH11):c.3672+5_3672+11delTGCTTTTinsG	MYH11	chr16	15732552	15732559	3'UTR	AAAAGCA	C					60.7832	71.1363	0.27964	no	0.490683	0.503226	0.0425532	0.0444444
chr16_173697_173698_+_T_C	NM_000517.4(HBA2):c.*98T>C	HBA2	chr16	173697	173698	3'UTR	T	C	174.393	85.2222	0.507585	no	86.3611	89.7514	0.853014	no	0.626667	0.633333	0.0307692	0.0307692
chr16_173702_173703_+_G_A	NM_000517.4(HBA2):c.*103G>A	HBA2	chr16	173702	173703	3'UTR	G	A	174.393	142.731	0.87209	no	86.3611	80.3673	0.701773	no	0.626667	0.62	0.0307692	0.0384615
chr16_2088614_2088615_+_G_A	NM_000548.4(TSC2):c.*5G>A	TSC2	chr16	2088614	2088615	3'UTR	G	A	123.446	77.097	0.758008	no	86.2605	74.0241	0.590151	no	0.553333	0.546667	0.0461538	0.0461538
chr16_23624006_23624007_+_A_C	NM_024675.3(PALB2):c.2834+2T>G	PALB2	chr16	23624006	23624007	3'UTR	A	C	11.8278	105.334	0.0334503	yes	75.4057	85.9246	0.651121	no	0.432258	0.43871	0.0518519	0.0444444
chr16_23624007_23624008_+_C_G	NM_024675.3(PALB2):c.2834+1G>C	PALB2	chr16	23624007	23624008	3'UTR	C	G					73.2488	71.795	0.941837	no	0.432258	0.432258	0.0518519	0.0518519
chr16_23624007_23624008_+_C_T	NM_024675.3(PALB2):c.2834+1G>A	PALB2	chr16	23624007	23624008	3'UTR	C	T					73.2488	83.524	0.527929	no	0.432258	0.425806	0.0518519	0.0518519
chr16_23624094_23624095_+_C_G	NM_024675.3(PALB2):c.2749-1G>C	PALB2	chr16	23624094	23624095	3'UTR	C	G					92.4502	86.2135	0.651816	no	0.419355	0.419355	0.0888889	0.0888889
chr16_23624095_23624096_+_T_G	NM_024675.3(PALB2):c.2749-2A>C	PALB2	chr16	23624095	23624096	3'UTR	T	G					92.4502	152.128	0.05922	no	0.419355	0.425806	0.0888889	0.0814815
chr16_2500959_2500960_+_G_A	NM_001199107.1(TBC1D24):c.*2G>A	TBC1D24	chr16	2500959	2500960	3'UTR	G	A	118.083	15.2671	0.0132918	yes					0.670968	0.664516	0.0222222	0.0222222
chr16_31191478_31191479_+_G_A	(G-A)_+41_to_termination_codon	FUS	chr16	31191478	31191479	3'UTR	G	A	65.7286	24.3338	0.156344	no	85.4412	72.107	0.317875	no	0.483871	0.477419	0.0592593	0.0666667
chr16_576254_576255_+_G_A	NM_004204.3(PIGQ):c.942+1G>A	PIGQ	chr16	576254	576255	3'UTR	G	A					91.5324	88.3487	0.812324	no	0.677419	0.670968	0.0148148	0.0148148
chr16_86514260_86514261_+_T_-	NM_001451.2(FOXF1):c.*1176delT	FOXF1	chr16	86514260	86514261	3'UTR	T	-					82.7604	90.149	0.647815	no	0.348387	0.350649	0.118519	0.119403
chr16_89738880_89738881_+_C_T	NM_000135.2(FANCA):c.4260+1G>A	FANCA	chr16	89738880	89738881	3'UTR	C	T	49.0368	29.78	0.484743	no	79.6817	91.928	0.677076	no	0.535484	0.529032	0.037037	0.037037
chr16_89739561_89739562_+_C_T	NM_000135.2(FANCA):c.3935-9G>A	FANCA	chr16	89739561	89739562	3'UTR	C	T	11.4016	31.4584	0.0831824	no	115.596	72.1257	0.130733	no	0.593548	0.587097	0.0296296	0.0296296
chr17_32488940_32488941_+_C_G	(C-G)_+397_to_termination_codon	CDK5R1	chr17	32488940	32488941	3'UTR	C	G	14.7157	125.714	0.079022	no	45.1656	81.3445	0.0166992	no	0.580645	0.580645	0.0296296	0.0296296
chr17_32491071_32491072_+_G_A	(G-A)_+2528_to_termination_codon	CDK5R1	chr17	32491071	32491072	3'UTR	G	A	35.2592	10.0308	0.0499052	yes	70.2253	86.237	0.313502	no	0.354839	0.348387	0.111111	0.111111
chr17_44076044_44076045_+_T_C	NM_138387.3(G6PC3):c.*2T>C	G6PC3	chr17	44076044	44076045	3'UTR	T	C					82.2407	59.1509	0.191046	no	0.567742	0.574194	0.0148148	0.0148148
chr17_46876875_46876876_+_C_T	(C-T)_+158_to_termination_codon	WNT9B	chr17	46876875	46876876	3'UTR	C	T					110.544	77.3192	0.174591	no	0.535484	0.529032	0.037037	0.037037
chr17_46938777_46938778_+_G_T	NM_004287.4(GOSR2):c.*18G>T	GOSR2	chr17	46938777	46938778	3'UTR	G	T	40.6131	13.9928	0.0404331	yes	79.7678	73.1948	0.665822	no	0.56129	0.554839	0.0148148	0.0148148
chr1_75762839_75762840_+_C_T	NM_000016.5(ACADM):c.*77C>T	ACADM	chr1	75762839	75762840	3'UTR	C	T	45.586	13.69	0.0308982	yes	65.6753	100.963	0.135831	no	0.380645	0.374194	0.0888889	0.0888889
chr17_7456740_7456741_+_C_T	NM_000747.2(CHRNB1):c.*18C>T	CHRNB1	chr17	7456740	7456741	3'UTR	C	T					93.844	78.5905	0.553065	no	0.535484	0.529032	0.0444444	0.0444444
chr18_34829078_34829079_+_A_C	NM_001390.4(DTNA):c.1094+1403A>C	DTNA	chr18	34829078	34829079	3'UTR	A	C	31.4112	29.9915	0.935117	no	75.0371	81.4326	0.700285	no	0.412903	0.419355	0.0962963	0.0962963
chr18_57731837_57731838_+_A_G	NM_005603.5(ATP8B1):c.-22-9T>C	ATP8B1	chr18	57731837	57731838	3'UTR	A	G	33.6018	19.1562	0.557267	no	55.6551	89.6107	0.00685828	no	0.445161	0.451613	0.0518519	0.0518519
chr19_11033870_11033871_+_A_-	NM_001128849.1(SMARCA4):c.3873+6delA	SMARCA4	chr19	11033870	11033871	3'UTR	A	-					94.9237	74.6054	0.255626	no	0.6	0.603896	0.0296296	0.0298507
chr19_12899705_12899706_+_A_G	NM_000159.3(GCDH):c.*165A>G	GCDH	chr19	12899705	12899706	3'UTR	A	G	22.3349	17.8988	0.260868	no	90.1739	69.7821	0.252368	no	0.412903	0.419355	0.0518519	0.0518519
chr19_12899828_12899829_+_G_T	NM_000159.3(GCDH):c.*288G>T	GCDH	chr19	12899828	12899829	3'UTR	G	T					58.4078	88.6783	0.0444682	no	0.541935	0.535484	0.0296296	0.0296296
chr19_35039866_35039867_+_G_T	(G-T)_+166_to_termination_codon	SCN1B	chr19	35039866	35039867	3'UTR	G	T					94.9014	74.6946	0.362826	no	0.651613	0.645161	0.0222222	0.0222222
chr19_48966742_48966743_+_C_T	NM_000146.3(FTL):c.*8C>T	FTL	chr19	48966742	48966743	3'UTR	C	T					59.6612	105.006	0.0726437	no	0.535484	0.529032	0.0666667	0.0666667
chr19_55159888_55159889_+_C_A	NM_001256714.1(DNAAF3):c.1364+10G>T	DNAAF3	chr19	55159888	55159889	3'UTR	C	A	106.935	75.2127	0.478384	no	91.7699	99.2163	0.719529	no	0.606452	0.6	0.037037	0.0444444
chr20_3923333_3923334_+_G_C	NM_153638.3(PANK2):c.*40G>C	PANK2	chr20	3923333	3923334	3'UTR	G	C					57.8115	69.782	0.438145	no	0.445161	0.445161	0.0518519	0.0518519
chr2_111166159_111166160_+_C_T	(C-T)_+1929_to_termination_codon	BCL2L11	chr2	111166159	111166160	3'UTR	C	T					63.9729	101.665	0.145167	no	0.554839	0.548387	0.0518519	0.0592593
chr21_31668826_31668827_+_T_C	(T-C)_+249_to_termination_codon	SOD1	chr21	31668826	31668827	3'UTR	T	C	29.9784	13.7854	0.228741	no	85.7994	85.2036	0.974622	no	0.393548	0.4	0.0592593	0.0592593
chr2_166294663_166294664_+_T_G	NM_002977.3(SCN9A):c.902-2A>C	SCN9A	chr2	166294663	166294664	3'UTR	T	G	11.2514	20.2084	0.0784274	no	74.1488	77.1127	0.827234	no	0.387097	0.393548	0.0666667	0.0666667
chr2_178461275_178461276_+_A_C	NM_001042702.3(PJVK):c.*2A>C	PJVK	chr2	178461275	178461276	3'UTR	A	C					70.5008	89.0397	0.222776	no	0.381579	0.388158	0.0681818	0.0681818
chr2_178528268_178528269_+_C_T	NM_001256850.1(TTN):c.102454+5G>A	TTN	chr2	178528268	178528269	3'UTR	C	T					75.3581	72.4755	0.877318	no	0.470968	0.464516	0.0666667	0.0666667
chr2_178528272_178528273_+_C_T	NM_001256850.1(TTN):c.102454+1G>A	TTN	chr2	178528272	178528273	3'UTR	C	T					70.7112	73.6954	0.82639	no	0.451613	0.445161	0.0740741	0.0740741
chr2_178531386_178531387_+_C_T	NM_133379.4(TTN):c.*265+213933G>A	TTN	chr2	178531386	178531387	3'UTR	C	T	155.937	24.7308	0.0454172	yes	84.5083	62.846	0.306575	no	0.464516	0.458065	0.0296296	0.0296296
chr2_178550285_178550286_+_G_A	NM_001256850.1(TTN):c.86642-13C>T	TTN	chr2	178550285	178550286	3'UTR	G	A					64.8405	80.9644	0.303701	no	0.354839	0.348387	0.133333	0.133333
chr2_178554862_178554863_+_A_C	NM_001256850.1(TTN):c.83671+2T>G	TTN	chr2	178554862	178554863	3'UTR	A	C	28.8805	12.1226	0.12149	no	86.0111	85.2431	0.96618	no	0.458065	0.464516	0.0814815	0.0740741
chr2_178554863_178554864_+_C_A	NM_001267550.2(TTN):c.88594+1G>T	TTN	chr2	178554863	178554864	3'UTR	C	A	7.88157	490.303	0.000236106	yes	65.2155	60.4746	0.70756	no	0.458065	0.451613	0.0888889	0.0888889
chr2_178556846_178556847_+_C_G	NM_133378.4(TTN):c.80602+1G>C	TTN	chr2	178556846	178556847	3'UTR	C	G					64.1634	85.7932	0.258392	no	0.432258	0.432258	0.0888889	0.0888889
chr2_178557247_178557248_+_C_T	NM_001256850.1(TTN):c.83086+5G>A	TTN	chr2	178557247	178557248	3'UTR	C	T					77.1263	76.0289	0.936295	no	0.451613	0.445161	0.0518519	0.0518519
chr2_178557558_178557559_+_C_A	NM_133379.4(TTN):c.*265+187761G>T	TTN	chr2	178557558	178557559	3'UTR	C	A					65.3128	64.3253	0.961472	no	0.419355	0.412903	0.0962963	0.0962963
chr2_178579393_178579394_+_C_G	NM_133378.4(TTN):c.59933-1G>C	TTN	chr2	178579393	178579394	3'UTR	C	G					132.815	63.0301	0.00784292	no	0.412903	0.412903	0.0962963	0.0962963
chr2_178579394_178579395_+_T_C	NM_001267550.2(TTN):c.67637-2A>G	TTN	chr2	178579394	178579395	3'UTR	T	C					104.072	63.9916	0.0505664	no	0.412903	0.419355	0.0962963	0.0962963
chr2_178579396_178579397_+_T_C	NM_133378.4(TTN):c.59933-4A>G	TTN	chr2	178579396	178579397	3'UTR	T	C	23.329	71.9425	0.148836	no	75.6992	82.8005	0.706421	no	0.412903	0.419355	0.0962963	0.0888889
chr2_178579937_178579938_+_C_T	NM_001256850.1(TTN):c.62425+1G>A	TTN	chr2	178579937	178579938	3'UTR	C	T					77.2241	93.5124	0.575096	no	0.445161	0.43871	0.0592593	0.0592593
chr2_178584667_178584668_+_C_A	NM_001256850.1(TTN):c.60049+1G>T	TTN	chr2	178584667	178584668	3'UTR	C	A	8.31148	17.3539	0.109072	no	48.3868	65.8606	0.172715	no	0.412903	0.406452	0.0518519	0.0518519
chr2_178586808_178586809_+_T_C	NM_001267550.2(TTN):c.64094-2A>G	TTN	chr2	178586808	178586809	3'UTR	T	C	21.3822	11.4401	0.256166	no	64.9328	77.2895	0.331895	no	0.470968	0.477419	0.0814815	0.0740741
chr2_178604985_178604986_+_C_T	NM_001267550.2(TTN):c.54190+1G>A	TTN	chr2	178604985	178604986	3'UTR	C	T	50.5014	15.1603	0.193688	no	82.6573	70.1008	0.487831	no	0.445161	0.43871	0.0592593	0.0592593
chr2_178614753_178614754_+_C_G	NM_001267550.2(TTN):c.48761-1G>C	TTN	chr2	178614753	178614754	3'UTR	C	G	27.2343	18.2342	0.326837	no	90.1235	82.1299	0.613939	no	0.445161	0.445161	0.0518519	0.0518519
chr2_178636623_178636624_+_G_A	NM_133379.4(TTN):c.*265+108696C>T	TTN	chr2	178636623	178636624	3'UTR	G	A					110.971	65.6793	0.0100675	no	0.451613	0.445161	0.0222222	0.0222222
chr2_178678504_178678505_+_G_A	NM_001256850.1(TTN):c.32876-8C>T	TTN	chr2	178678504	178678505	3'UTR	G	A					75.458	89.1964	0.576626	no	0.425806	0.419355	0.0740741	0.0740741
chr2_178723699_178723700_+_T_C	NM_133378.4(TTN):c.17672-4A>G	TTN	chr2	178723699	178723700	3'UTR	T	C	72.9264	101.207	0.678316	no	72.2089	88.6942	0.362464	no	0.425806	0.432258	0.0666667	0.0592593
chr2_218873873_218873874_+_G_A	(G-A)_+29_to_termination_codon	WNT6	chr2	218873873	218873874	3'UTR	G	A					100.905	69.1876	0.245869	no	0.696774	0.690323	0.0222222	0.0222222
chr2_240878861_240878862_+_C_A	NM_000030.2(AGXT):c.*41C>A	AGXT	chr2	240878861	240878862	3'UTR	C	A					95.7178	103.833	0.732023	no	0.612903	0.606452	0.0148148	0.0222222
chr2_240879109_240879110_+_A_C	NM_000030.2(AGXT):c.*289A>C	AGXT	chr2	240879109	240879110	3'UTR	A	C	20.6573	115.313	0.0654648	yes	92.0085	72.9304	0.275647	no	0.56129	0.567742	0.0296296	0.0296296
chr22_46357013_46357014_+_G_C	NM_018006.4(TRMU):c.*8G>C	TRMU	chr22	46357013	46357014	3'UTR	G	C					97.2785	80.578	0.438784	no	0.593548	0.593548	0.0222222	0.0222222
chr2_32154506_32154507_+_T_C	NM_014946.3(SPAST):c.*11T>C	SPAST	chr2	32154506	32154507	3'UTR	T	C					52.6649	94.3244	0.000469933	no	0.412903	0.419355	0.0740741	0.0740741
chr3_14141802_14141803_+_C_T	NM_024334.2(TMEM43):c.*8C>T	TMEM43	chr3	14141802	14141803	3'UTR	C	T	79.1526	16.7609	0.124763	no	66.2881	62.0731	0.80197	no	0.6	0.593548	0.0222222	0.0222222
chr3_14152416_14152417_+_C_T	NM_004628.4(XPC):c.2034-1G>A	XPC	chr3	14152416	14152417	3'UTR	C	T	13.087	49.0405	0.104078	no	49.7671	75.9415	0.0515918	no	0.522581	0.516129	0.037037	0.037037
chr4_15601425_15601426_+_T_A	NM_001080522.2(CC2D2A):c.*1T>A	CC2D2A	chr4	15601425	15601426	3'UTR	T	A					66.813	52.7939	0.279022	no	0.316129	0.316129	0.118519	0.118519
chr4_186210644_186210645_+_T_C	NM_207352.3(CYP4V2):c.*4T>C	CYP4V2	chr4	186210644	186210645	3'UTR	T	C	8.80558	9.12186	0.896054	no	67.0214	73.3936	0.678851	no	0.380645	0.387097	0.0962963	0.0888889
chr5_111126898_111126899_+_T_C	(T-C)_+16_to_termination_codon	WDR36	chr5	111126898	111126899	3'UTR	T	C					87.2508	67.4749	0.309352	no	0.348387	0.354839	0.0814815	0.0740741
chr5_112844373_112844374_+_A_G	(A-G)_+248_to_termination_codon	APC	chr5	112844373	112844374	3'UTR	A	G	15.9575	32.3563	0.167884	no	63.5419	81.5281	0.231158	no	0.36129	0.367742	0.118519	0.118519
chr5_119541999_119542000_+_A_G	NM_000414.3(HSD17B4):c.*6A>G	HSD17B4	chr5	119541999	119542000	3'UTR	A	G	1668.51	11.3513	0.00892381	yes	48.1052	62.9413	0.270481	no	0.387097	0.393548	0.0962963	0.0962963
chr5_127457321_127457322_+_C_G	NM_032446.2(MEGF10):c.*4C>G	MEGF10	chr5	127457321	127457322	3'UTR	C	G	52.3422	66.8132	0.803051	no	55.6451	83.8709	0.0599786	no	0.483871	0.483871	0.0296296	0.0296296
chr5_132867599_132867600_+_C_T	NM_014402.4(UQCRQ):c.*18C>T	UQCRQ	chr5	132867599	132867600	3'UTR	C	T					110.254	53.2162	0.00836922	no	0.490323	0.483871	0.037037	0.037037
chr5_134751053_134751054_+_C_A	(C-A)_+104_to_termination_codon	CAMLG	chr5	134751053	134751054	3'UTR	C	A					95.735	123.074	0.498478	no	0.393548	0.387097	0.111111	0.118519
chr5_1815930_1815931_+_C_T	NM_004553.4(NDUFS6):c.*15C>T	NDUFS6	chr5	1815930	1815931	3'UTR	C	T	9.56497	12.8255	0.561779	no	77.3119	103.676	0.220691	no	0.593548	0.587097	0.0296296	0.0296296
chr6_108187529_108187530_+_C_A	(C-A)_+67_to_termination_codon	NR2E1	chr6	108187529	108187530	3'UTR	C	A					63.5906	53.5817	0.257295	no	0.477419	0.470968	0.0592593	0.0592593
chr6_116632448_116632449_+_A_G	NM_001010892.2(RSPH4A):c.*8A>G	RSPH4A	chr6	116632448	116632449	3'UTR	A	G					78.6759	56.5663	0.351607	no	0.4	0.406452	0.0888889	0.0814815
chr6_1394883_1394884_+_G_A	(G-A)_+25_to_termination_codon	FOXF2	chr6	1394883	1394884	3'UTR	G	A	227.748	38.8881	0.391623	no	54.3689	69.6375	0.399711	no	0.574194	0.567742	0.037037	0.037037
chr6_144188711_144188712_+_A_AA	NM_003764.3(STX11):c.*1221dupA	STX11	chr6	144188711	144188712	3'UTR	A	AA	28.8493	15.398	0.160393	no	80.2775	86.2228	0.759487	no	0.335484	0.333333	0.0666667	0.0661765
chr6_31945660_31945661_+_A_G	NM_000063.5(C2):c.*304A>G	C2;CFB	chr6	31945660	31945661	3'UTR	A	G					83.9643	63.489	0.0897009	no	0.458065	0.464516	0.037037	0.037037
chr6_50844315_50844317_+_CA_-	NM_003221.3(TFAP2B):c.*924_*925delCA	TFAP2B	chr6	50844315	50844317	3'UTR	CA	-					71.3644	57.1999	0.34043	no	0.365385	0.363636	0.110294	0.11194
chr6_52492431_52492432_+_T_C	(T-C)_+91_to_termination_codon	EFHC1	chr6	52492431	52492432	3'UTR	T	C	28.6896	30.1547	0.867403	no	76.019	96.2255	0.344287	no	0.412903	0.419355	0.0814815	0.0814815
chr6_87511765_87511766_+_G_T	NM_006416.4(SLC35A1):c.*240G>T	RARS2;SLC35A1	chr6	87511765	87511766	3'UTR	G	T					74.9427	71.5882	0.833755	no	0.341935	0.335484	0.125926	0.125926
chr7_107715514_107715515_+_C_A	(C-A)_+69_to_termination_codon	SLC26A4	chr7	107715514	107715515	3'UTR	C	A	24.0969	7.70983	0.00235693	yes	70.8528	71.0614	0.989674	no	0.406452	0.4	0.0592593	0.0666667
chr7_151047440_151047441_+_G_T	(G-T)_+2092_to_termination_codon	ABCB8	chr7	151047440	151047441	3'UTR	G	T					64.4331	69.4296	0.802711	no	0.490323	0.483871	0.0740741	0.0740741
chr7_92491502_92491503_+_C_T	NM_000466.2(PEX1):c.3208-1G>A	PEX1	chr7	92491502	92491503	3'UTR	C	T					129.069	101.071	0.536534	no	0.4	0.393548	0.0740741	0.0740741
chr8_11564445_11564446_+_T_G	NM_001715.2(BLK):c.*338T>G	BLK	chr8	11564445	11564446	3'UTR	T	G					88.1282	55.4107	0.0640443	no	0.670968	0.677419	0.037037	0.037037
chr9_105640088_105640089_+_T_C	NM_001079802.1(FKTN):c.*4825T>C	FKTN	chr9	105640088	105640089	3'UTR	T	C	20.7844	14.4776	0.462721	no	84.1068	80.8447	0.863089	no	0.412903	0.419355	0.0666667	0.0592593
chrM_1026_1027_+_A_G	NC_012920.1:m.1027A>G	MT-RNR1	chrM	1026	1027	3'UTR	A	G					99.5484	104.083	0.885468	no	0.419355	0.425806	0.0888889	0.0888889
chrM_960_961_+_T_G	m.961T>G	MT-RNR1	chrM	960	961	3'UTR	T	G					68.1555	62.2843	0.665971	no	0.451613	0.458065	0.0740741	0.0740741
chrX_123912360_123912361_+_A_AA	NM_001167.3(XIAP):c.*5180dupA	XIAP	chrX	123912360	123912361	3'UTR	A	AA					76.0962	80.1953	0.783977	no	0.329032	0.326923	0.125926	0.125
chrX_147949603_147949604_+_C_A	(C-A)_+760_to_termination_codon	FMR1	chrX	147949603	147949604	3'UTR	C	A	24.7602	48.3862	0.258062	no	85.0237	71.8203	0.396769	no	0.374194	0.367742	0.0888889	0.0888889
chrX_17735471_17735472_+_T_A	(T-A)_+3008_to_termination_codon	NHS	chrX	17735471	17735472	3'UTR	T	A	18.5649	27.836	0.0154639	no	77.5809	82.547	0.764504	no	0.348387	0.348387	0.0888889	0.0888889
chr10_117278156_117278157_+_G_A	(G-A)_+891_to_termination_codon	SLC18A2	chr10	117278156	117278157	3'UTR	G	A	35.816	20.4269	0.098726	no	73.9493	79.7586	0.707114	no	0.4	0.393548	0.0740741	0.0814815
chr10_117279247_117279248_+_C_A	(C-A)_+1982_to_termination_codon	SLC18A2	chr10	117279247	117279248	3'UTR	C	A	12.4002	22.1082	0.252562	no	61.9893	91.8777	0.0402101	no	0.380645	0.374194	0.0814815	0.0814815
chr10_119677499_119677500_+_G_C	(G-C)_+218_to_termination_codon	BAG3	chr10	119677499	119677500	3'UTR	G	C					82.9211	84.6401	0.930443	no	0.451613	0.451613	0.0666667	0.0666667
chr10_72009233_72009234_+_C_A	(C-A)_+763_to_termination_codon	CHST3	chr10	72009233	72009234	3'UTR	C	A	19.2641	11.6401	0.319899	no	86.1105	81.1767	0.755947	no	0.516129	0.509677	0.0592593	0.0592593
chr11_116832954_116832955_+_G_T	(G-T)_+71_to_termination_codon	APOC3	chr11	116832954	116832955	3'UTR	G	T	12.438	10.5909	0.763242	no	82.016	83.2274	0.941758	no	0.554839	0.548387	0.0518519	0.0518519
chr1_111712766_111712767_+_C_A	(C-A)_+3532_to_termination_codon	RAP1A	chr1	111712766	111712767	3'UTR	C	A					90.6997	77.051	0.383876	no	0.341935	0.335484	0.125926	0.133333
chr1_12207234_12207235_+_C_T	(T-C)_+215_to_termination_codon	TNFRSF1B	chr1	12207234	12207235	3'UTR	C	T					115.05	65.7643	0.0378124	no	0.619355	0.612903	0.0148148	0.0148148
chr11_2848877_2848878_+_A_G	(A-G)_+875_to_termination_codon	KCNQ1	chr11	2848877	2848878	3'UTR	A	G	20.9685	15.6247	0.685119	no	76.2585	79.7532	0.850339	no	0.464516	0.470968	0.0518519	0.0518519
chr11_35231724_35231725_+_C_T	(C-T)_+2392_to_termination_codon	CD44	chr11	35231724	35231725	3'UTR	C	T	297.838	10.348	2.34257e-08	yes	81.5199	73.7835	0.71336	no	0.464516	0.458065	0.0592593	0.0592593
chr11_46739503_46739504_+_C_T	(C-T)_+96_to_termination_codon	F2	chr11	46739503	46739504	3'UTR	C	T					57.3326	82.8299	0.0909127	no	0.471429	0.464286	0.0583333	0.0583333
chr1_163076560_163076561_+_G_T	(T-G)_+2001_to_termination_codon	RGS4	chr1	163076560	163076561	3'UTR	G	T	62.5535	15.2129	0.0453868	yes	89.3182	95.5191	0.748928	no	0.393548	0.387097	0.0814815	0.0814815
chr1_192812041_192812042_+_C_G	(C-G)_+446_to_termination_codon	RGS2	chr1	192812041	192812042	3'UTR	C	G	16.5344	21.471	0.591367	no	81.8135	95.2056	0.399926	no	0.406452	0.406452	0.103704	0.103704
chr1_204549713_204549714_+_C_A	(A-C)_+32_to_termination_codon	MDM4	chr1	204549713	204549714	3'UTR	C	A					51.2603	67.1939	0.189936	no	0.341935	0.335484	0.118519	0.118519
chr12_123409282_123409283_+_C_T	(T-C)_+1580_to_termination_codon	KMT5A	chr12	123409282	123409283	3'UTR	C	T					74.6443	65.2327	0.657822	no	0.316129	0.309677	0.0888889	0.0962963
chr1_247448733_247448734_+_G_C	(C-G)_+230_to_termination_codon	NLRP3	chr1	247448733	247448734	3'UTR	G	C	36.3516	22.0773	0.308444	no					0.516129	0.516129	0.0444444	0.0444444
chr1_26427450_26427451_+_T_C	(T-C)_+993_to_termination_codon	LIN28A	chr1	26427450	26427451	3'UTR	T	C	44.1592	10.6438	0.00016328	yes	83.2125	53.6778	0.0369971	no	0.477419	0.483871	0.0518519	0.0444444
chr12_65964566_65964567_+_C_T	(T-C)_+1275_to_termination_codon	HMGA2	chr12	65964566	65964567	3'UTR	C	T					69.989	46.6754	0.236042	no	0.4	0.393548	0.118519	0.118519
chr13_49528673_49528674_+_G_A	(G-A)_+9_to_termination_codon	PHF11	chr13	49528673	49528674	3'UTR	G	A					76.4102	68.3028	0.616198	no	0.490323	0.483871	0.0444444	0.0444444
chr14_56647666_56647667_+_G_A	(G-A)_+170_to_termination_codon	TMEM260	chr14	56647666	56647667	3'UTR	G	A					60.9741	67.5775	0.49938	no	0.419355	0.412903	0.103704	0.103704
chr14_96241885_96241886_+_T_C	(T-C)_+382_to_termination_codon	BDKRB2	chr14	96241885	96241886	3'UTR	T	C	114.868	35.9825	0.309024	no	64.6833	98.6506	0.0514393	no	0.554839	0.56129	0.0222222	0.0222222
chr15_33866064_33866065_+_A_G	(A-G)_+839_to_termination_codon	RYR3	chr15	33866064	33866065	3'UTR	A	G					65.4045	101.048	0.119664	no	0.445161	0.451613	0.0962963	0.0962963
chr15_98962598_98962599_+_A_G	(A-G)_+5157_to_termination_codon	IGF1R	chr15	98962598	98962599	3'UTR	A	G	23.722	45.2421	0.272145	no	63.832	88.0622	0.117213	no	0.503226	0.509677	0.0296296	0.0296296
chr16_55505701_55505702_+_A_C	(A-C)_+260_to_termination_codon	MMP2	chr16	55505701	55505702	3'UTR	A	C	322.989	27.4577	0.26163	no	48.6655	76.4559	0.0563917	no	0.574194	0.580645	0.037037	0.0296296
chr16_55703778_55703779_+_C_T	(C-T)_+1433_to_termination_codon	SLC6A2	chr16	55703778	55703779	3'UTR	C	T	26.8587	82.8076	6.31544e-05	yes	83.7695	59.2355	0.17239	no	0.483871	0.477419	0.0518519	0.0518519
chr16_56983749_56983750_+_G_A	(G-A)_+84_to_termination_codon	CETP	chr16	56983749	56983750	3'UTR	G	A					75.714	88.2885	0.618809	no	0.56129	0.554839	0.0444444	0.0444444
chr16_68833552_68833553_+_C_T	(C-T)_+54_to_termination_codon	CDH1	chr16	68833552	68833553	3'UTR	C	T	222.415	86.3809	0.53874	no	99.6167	72.4371	0.0780142	no	0.535484	0.529032	0.0148148	0.0148148
chr16_85921635_85921636_+_C_T	(C-T)_+354_to_termination_codon	IRF8	chr16	85921635	85921636	3'UTR	C	T	14.5115	11.3002	0.573295	no	62.8067	61.2962	0.910647	no	0.380645	0.374194	0.0740741	0.0740741
chr17_42521702_42521703_+_T_C	(T-C)_+583_to_termination_codon	ATP6V0A1	chr17	42521702	42521703	3'UTR	T	C	26.4817	25.1117	0.921564	no	61.7427	69.5291	0.610723	no	0.580645	0.587097	0.0444444	0.0444444
chr17_44352875_44352876_+_C_T	(C-T)_+78_to_termination_codon	GRN	chr17	44352875	44352876	3'UTR	C	T					97.8694	87.0725	0.593945	no	0.625806	0.619355	0.0296296	0.0296296
chr17_78223701_78223702_+_T_C	(T-C)_+148_to_termination_codon	BIRC5	chr17	78223701	78223702	3'UTR	T	C	46.2251	37.3532	0.324753	no	88.1963	96.1269	0.699952	no	0.477419	0.483871	0.0296296	0.0296296
chr17_82727549_82727550_+_A_G	(G-A)_+379_to_termination_codon	FN3KRP	chr17	82727549	82727550	3'UTR	A	G					81.094	91.8553	0.588656	no	0.606452	0.612903	0.0296296	0.0296296
chr1_78536903_78536904_+_A_G	(A-G)_+217_to_termination_codon	PTGFR	chr1	78536903	78536904	3'UTR	A	G	47.201	61.5641	0.273653	no	83.8445	85.9361	0.911054	no	0.393548	0.4	0.0814815	0.0740741
chr19_29824108_29824109_+_C_T	(C-T)_+332_to_termination_codon	CCNE1	chr19	29824108	29824109	3'UTR	C	T	11.265	217.258	0.000175102	yes	96.3996	95.4311	0.961813	no	0.587097	0.580645	0.0222222	0.0222222
chr19_582926_582927_+_T_A	(T-A)_+350_to_termination_codon	BSG	chr19	582926	582927	3'UTR	T	A	41.9482	54.327	0.810534	no	82.6458	87.9621	0.731741	no	0.490323	0.490323	0.0296296	0.0296296
chr20_46016406_46016407_+_A_C	(A-C)_+39_to_termination_codon	MMP9	chr20	46016406	46016407	3'UTR	A	C	314.202	55.4728	0.116157	no	88.653	85.5914	0.892351	no	0.56129	0.567742	0.037037	0.037037
chr20_6779332_6779333_+_A_C	(A-C)_+244_to_termination_codon	BMP2	chr20	6779332	6779333	3'UTR	A	C					71.7516	92.8973	0.165311	no	0.341935	0.348387	0.111111	0.103704
chr20_6779553_6779554_+_T_C	(C-T)_+465_to_termination_codon	BMP2	chr20	6779553	6779554	3'UTR	T	C					90.0928	87.2066	0.888782	no	0.425806	0.432258	0.0666667	0.0666667
chr2_138014189_138014190_+_A_G	(A-G)_+60_to_termination_codon	HNMT	chr2	138014189	138014190	3'UTR	A	G					62.804	94.3204	0.0695252	no	0.329032	0.335484	0.0962963	0.0888889
chr2_202560751_202560752_+_C_T	(C-T)_+806_to_termination_codon	BMPR2	chr2	202560751	202560752	3'UTR	C	T	25.3116	67.2297	0.244677	no	67.2736	72.6582	0.796659	no	0.380645	0.374194	0.0666667	0.0666667
chr2_203873186_203873187_+_G_A	(G-A)_+375_to_termination_codon	CTLA4	chr2	203873186	203873187	3'UTR	G	A					82.5709	82.6512	0.996467	no	0.393548	0.387097	0.111111	0.111111
chr2_218136010_218136011_+_T_C	(C-T)_+127_to_termination_codon	CXCR2	chr2	218136010	218136011	3'UTR	T	C	33.0636	89.3882	0.0924411	no	68.3052	91.2892	0.195199	no	0.516129	0.522581	0.0444444	0.037037
chr3_119818443_119818444_+_T_C	(C-T)_+1232_to_termination_codon	NR1I2	chr3	119818443	119818444	3'UTR	T	C	19.1156	12.6941	0.227496	no	84.6507	92.083	0.649176	no	0.387097	0.393548	0.111111	0.111111
chr3_12583263_12583264_+_T_C	(T-C)_+1011_to_termination_codon	MKRN2	chr3	12583263	12583264	3'UTR	T	C	24.4987	9.60631	0.011127	yes	79.0483	59.8793	0.268397	no	0.419355	0.425806	0.0666667	0.0592593
chr3_138403279_138403280_+_C_T	(C-T)_+1011_to_termination_codon	MRAS	chr3	138403279	138403280	3'UTR	C	T	62.1632	39.9306	0.483535	no	83.508	84.8321	0.937412	no	0.483871	0.477419	0.0444444	0.0444444
chr3_148742200_148742201_+_A_C	(A-C)_+86_to_termination_codon	AGTR1	chr3	148742200	148742201	3'UTR	A	C					70.2848	75.2926	0.740691	no	0.432258	0.43871	0.0444444	0.0444444
chr3_184106768_184106769_+_G_A	(G-A)_+76_to_termination_codon	HTR3E	chr3	184106768	184106769	3'UTR	G	A					62.7295	71.7065	0.499591	no	0.522581	0.516129	0.0518519	0.0592593
chr3_189896846_189896847_+_C_T	(C-T)_+2345_to_termination_codon	TP63	chr3	189896846	189896847	3'UTR	C	T	23.404	27.8283	0.822378	no	76.8729	104.741	0.14126	no	0.477419	0.470968	0.0888889	0.0888889
chr4_1026602_1026603_+_C_G	(C-G)_+1256_to_termination_codon	FGFRL1	chr4	1026602	1026603	3'UTR	C	G	30.2075	21.9154	0.716656	no					0.548387	0.548387	0.0518519	0.0518519
chr4_4863418_4863419_+_A_G	(A-G)_+276_to_termination_codon	MSX1	chr4	4863418	4863419	3'UTR	A	G	19.2203	64.7179	0.0509999	yes	93.1509	84.7495	0.713865	no	0.490323	0.496774	0.0592593	0.0592593
chr4_54738773_54738774_+_G_A	(G-A)_+217_to_termination_codon	KIT	chr4	54738773	54738774	3'UTR	G	A					50.7819	74.1676	0.0705953	no	0.445161	0.43871	0.0740741	0.0740741
chr4_6302720_6302721_+_G_A	(G-A)_+253_to_termination_codon	WFS1	chr4	6302720	6302721	3'UTR	G	A					93.0011	76.0609	0.49268	no	0.522581	0.516129	0.0444444	0.0444444
chr4_95154813_95154814_+_C_T	(C-T)_+141_to_termination_codon	BMPR1B	chr4	95154813	95154814	3'UTR	C	T	133.538	39.6506	0.492866	no					0.541935	0.535484	0.0222222	0.0222222
chr5_119393692_119393693_+_A_G	(A-G)_+312_to_termination_codon	TNFAIP8	chr5	119393692	119393693	3'UTR	A	G	19.0299	11.1279	0.198426	no	78.2409	85.135	0.745933	no	0.406452	0.412903	0.0962963	0.0962963
chr5_175880252_175880253_+_T_C	(T-C)_+208_to_termination_codon	CPLX2	chr5	175880252	175880253	3'UTR	T	C					64.2354	109.374	0.180101	no	0.6	0.606452	0.0296296	0.0296296
chr6_133893386_133893387_+_C_G	(G-C)_+1585_to_termination_codon	TCF21	chr6	133893386	133893387	3'UTR	C	G	40.1336	39.3147	0.957125	no	92.8496	95.0414	0.91383	no	0.509677	0.509677	0.037037	0.037037
chr6_151101613_151101614_+_A_G	(A-G)_+9058_to_termination_codon	MTHFD1L	chr6	151101613	151101614	3'UTR	A	G	85.2297	11.5065	0.00390705	yes	78.8966	102.711	0.275578	no	0.432258	0.43871	0.0296296	0.0296296
chr6_160451619_160451620_+_G_A	(G-A)_+564_to_termination_codon	SLC22A3	chr6	160451619	160451620	3'UTR	G	A					87.2488	102.079	0.613142	no	0.554839	0.548387	0.0222222	0.0222222
chr6_29830971_29830972_+_C_G	(C-G)_+590_to_termination_codon	HLA-G	chr6	29830971	29830972	3'UTR	C	G					76.6134	57.3783	0.186411	no	0.419355	0.419355	0.0814815	0.0814815
chr6_29831016_29831017_+_A_G	(A-G)_+635_to_termination_codon	HLA-G	chr6	29831016	29831017	3'UTR	A	G					73.957	96.8074	0.282782	no	0.348387	0.354839	0.103704	0.0962963
chr6_52189450_52189451_+_G_A	(G-A)_+159_to_termination_codon	IL17A	chr6	52189450	52189451	3'UTR	G	A	24.4758	13.8011	0.387431	no	60.1184	75.4312	0.180796	no	0.432258	0.425806	0.0592593	0.0666667
chr7_112475602_112475603_+_C_T	(C-T)_+84_to_termination_codon	IFRD1	chr7	112475602	112475603	3'UTR	C	T					103.407	80.3835	0.209784	no	0.316129	0.309677	0.140741	0.140741
chr7_128949372_128949373_+_G_A	(G-A)_+555_to_termination_codon	IRF5	chr7	128949372	128949373	3'UTR	G	A					84.0758	75.5662	0.596615	no	0.393548	0.387097	0.0740741	0.0814815
chr7_30924206_30924207_+_G_C	(G-C)_+578_to_termination_codon	AQP1	chr7	30924206	30924207	3'UTR	G	C					89.7788	102.848	0.503602	no	0.6	0.6	0.0444444	0.0444444
chr7_55206390_55206391_+_T_C	(T-C)_+774_to_termination_codon	EGFR	chr7	55206390	55206391	3'UTR	T	C					76.4021	85.7827	0.618392	no	0.43871	0.445161	0.0444444	0.0444444
chr8_11759995_11759996_+_C_G	(C-G)_+1521_to_termination_codon	GATA4	chr8	11759995	11759996	3'UTR	C	G					85.1826	85.475	0.987902	no	0.425806	0.425806	0.0962963	0.0962963
chr8_19965680_19965681_+_T_C	(T-C)_+371_to_termination_codon	LPL	chr8	19965680	19965681	3'UTR	T	C	29.7881	56.34	0.38881	no	90.0182	75.9032	0.509073	no	0.451613	0.458065	0.0814815	0.0814815
chr8_19966980_19966981_+_T_C	(T-C)_+1671_to_termination_codon	LPL	chr8	19966980	19966981	3'UTR	T	C					70.6108	94.8869	0.351776	no	0.387097	0.393548	0.111111	0.111111
chr8_19967051_19967052_+_T_C	(C-T)_+1742_to_termination_codon	LPL	chr8	19967051	19967052	3'UTR	T	C	17.7027	16.8325	0.846607	no	73.0973	62.8976	0.512461	no	0.393548	0.4	0.103704	0.103704
chr9_117715654_117715655_+_G_C	(G-C)_+1007_to_termination_codon	TLR4	chr9	117715654	117715655	3'UTR	G	C	13.0952	14.6124	0.842116	no					0.432258	0.432258	0.037037	0.037037
chr9_117715852_117715853_+_G_C	(G-C)_+1205_to_termination_codon	TLR4	chr9	117715852	117715853	3'UTR	G	C					80.3059	95.1772	0.557269	no	0.43871	0.43871	0.0592593	0.0592593
chr9_137108974_137108975_+_A_G	(G-A)_+384_to_termination_codon	MAN1B1	chr9	137108974	137108975	3'UTR	A	G	20.0427	67.5955	0.118423	no	93.3381	100.721	0.821991	no	0.63871	0.645161	0.0148148	0.0148148
chr9_17796669_17796670_+_T_G	(T-G)_+927_to_termination_codon	SH3GL2	chr9	17796669	17796670	3'UTR	T	G					81.7771	95.4752	0.613093	no	0.419355	0.425806	0.0740741	0.0666667
chr9_5468256_5468257_+_G_C	(C-G)_+395_to_termination_codon	CD274	chr9	5468256	5468257	3'UTR	G	C	39.3533	30.4839	0.612375	no	75.0443	67.512	0.610608	no	0.470968	0.470968	0.037037	0.037037
chr9_99149373_99149374_+_A_G	(G-A)_+69_to_termination_codon	TGFBR1	chr9	99149373	99149374	3'UTR	A	G					72.243	84.6645	0.610242	no	0.464516	0.470968	0.0444444	0.0444444
chr9_99150188_99150189_+_A_G	(A-G)_+884_to_termination_codon	TGFBR1	chr9	99150188	99150189	3'UTR	A	G	8.91616	19.8077	2.05854e-05	yes	65.3858	82.1239	0.327259	no	0.374194	0.380645	0.0888889	0.0814815
chr10_100362845_100362846_+_T_C	(T-C)_+1913_to_termination_codon	SCD	chr10	100362845	100362846	3'UTR	T	C					64.5482	92.353	0.178303	no	0.554839	0.56129	0.0222222	0.0222222
chr10_102632822_102632823_+_C_T	(C-T)_+2668_to_termination_codon	SUFU	chr10	102632822	102632823	3'UTR	C	T	30.0538	48.0893	0.722492	no	75.7831	121.711	0.0388852	no	0.56129	0.554839	0.0444444	0.0444444
chr10_111079820_111079821_+_A_G	(G-A)_+427_to_termination_codon	ADRA2A	chr10	111079820	111079821	3'UTR	A	G					86.471	73.5531	0.598647	no	0.529032	0.535484	0.0740741	0.0666667
chr10_113729829_113729830_+_T_C	(C-T)_+290_to_termination_codon	CASP7	chr10	113729829	113729830	3'UTR	T	C	31.2317	74.5915	0.0171113	yes	81.7296	77.4674	0.814221	no	0.445161	0.451613	0.0740741	0.0740741
chr10_43129774_43129775_+_G_A	(A-G)_+1506_to_termination_codon	RET	chr10	43129774	43129775	3'UTR	G	A	238.641	10.2863	0.000687152	yes	67.2685	60.8619	0.679713	no	0.490323	0.483871	0.0444444	0.0518519
chr10_43130237_43130238_+_T_C	(T-C)_+1969_to_termination_codon	RET	chr10	43130237	43130238	3'UTR	T	C	27.4242	16.7742	0.233359	no	93.7803	81.4302	0.493883	no	0.329032	0.335484	0.133333	0.133333
chr1_109274967_109274968_+_G_T	(G-T)_+919_to_termination_codon	CELSR2	chr1	109274967	109274968	3'UTR	G	T					89.052	72.0292	0.256359	no	0.574194	0.567742	0.0222222	0.0222222
chr11_116832923_116832924_+_G_C	(C-G)_+40_to_termination_codon	APOC3	chr11	116832923	116832924	3'UTR	G	C	10.533	86.1616	0.0542961	yes	53.5571	89.1122	0.074692	no	0.554839	0.554839	0.0518519	0.0518519
chr11_18366580_18366581_+_G_C	(G-C)_+712_to_termination_codon	GTF2H1	chr11	18366580	18366581	3'UTR	G	C	28.8904	20.4783	0.606239	no	83.7598	81.3829	0.901065	no	0.393548	0.393548	0.0740741	0.0740741
chr11_35222510_35222511_+_A_G	NM_000610.3(CD44):c.2024+779A>G	CD44	chr11	35222510	35222511	3'UTR	A	G					88.15	48.156	0.00742448	no	0.451613	0.458065	0.0666667	0.0666667
chr1_147625464_147625465_+_T_C	(C-T)_+506_to_termination_codon	BCL9	chr1	147625464	147625465	3'UTR	T	C					84.1233	49.6846	0.0304583	no	0.451613	0.458065	0.0592593	0.0592593
chr1_147625833_147625834_+_T_C	(C-T)_+875_to_termination_codon	BCL9	chr1	147625833	147625834	3'UTR	T	C	45.3739	118.673	0.0485293	yes	67.1271	84.2499	0.262571	no	0.522581	0.529032	0.0444444	0.0444444
chr1_160088461_160088462_+_G_A	(A-G)_+645_to_termination_codon	KCNJ9	chr1	160088461	160088462	3'UTR	G	A					78.1096	88.7371	0.718381	no	0.580645	0.574194	0.0296296	0.0296296
chr1_171285750_171285751_+_C_T	(C-T)_+207_to_termination_codon	FMO1	chr1	171285750	171285751	3'UTR	C	T	33.7994	11.0445	0.00531859	yes	71.1088	72.5414	0.915698	no	0.43871	0.432258	0.0666667	0.0666667
chr1_201876446_201876447_+_C_A	(A-C)_+393_to_termination_codon	IPO9	chr1	201876446	201876447	3'UTR	C	A					118.171	108.566	0.771003	no	0.451613	0.445161	0.0814815	0.0814815
chr12_124015291_124015292_+_C_T	(C-T)_+2362_to_termination_codon	ZNF664	chr12	124015291	124015292	3'UTR	C	T	12.6778	9.48945	0.160809	no	77.0969	65.7518	0.414527	no	0.4	0.393548	0.118519	0.118519
chr12_130371770_130371771_+_C_T	(T-C)_+173_to_termination_codon	PIWIL1	chr12	130371770	130371771	3'UTR	C	T					74.5135	81.7959	0.730739	no	0.348387	0.341935	0.125926	0.125926
chr12_130876169_130876170_+_A_G	(A-G)_+244_to_termination_codon	RAN	chr12	130876169	130876170	3'UTR	A	G	19.9089	29.5365	0.310028	no	86.6435	73.689	0.448792	no	0.425806	0.432258	0.0666667	0.0592593
chr1_26429717_26429718_+_G_T	(T-G)_+3260_to_termination_codon	LIN28A	chr1	26429717	26429718	3'UTR	G	T	44.4342	10.4	0.0060664	yes	65.0843	69.9521	0.722132	no	0.412903	0.406452	0.0666667	0.0666667
chr1_26574216_26574217_+_G_A	(G-A)_+16_to_termination_codon	RPS6KA1	chr1	26574216	26574217	3'UTR	G	A	15.7237	113.676	0.0649018	yes					0.651613	0.645161	0.0222222	0.0222222
chr14_96242494_96242495_+_G_T	(G-T)_+991_to_termination_codon	BDKRB2	chr14	96242494	96242495	3'UTR	G	T					53.5351	125.277	0.00370042	no	0.496774	0.490323	0.0814815	0.0814815
chr15_67807104_67807105_+_C_T	(C-T)_+355_to_termination_codon	MAP2K5	chr15	67807104	67807105	3'UTR	C	T					74.5851	75.3782	0.97653	no	0.490323	0.483871	0.0592593	0.0592593
chr16_50732974_50732975_+_G_A	(G-A)_+1156_to_termination_codon	NOD2	chr16	50732974	50732975	3'UTR	G	A					52.4992	87.8376	0.00499537	no	0.354839	0.348387	0.118519	0.118519
chr16_67198780_67198781_+_A_G	(A-G)_+658_to_termination_codon	E2F4	chr16	67198780	67198781	3'UTR	A	G	13.584	12.8105	0.859833	no	96.4934	69.1748	0.203018	no	0.425806	0.432258	0.0814815	0.0814815
chr17_45835123_45835124_+_C_G	(C-G)_+360_to_termination_codon	CRHR1	chr17	45835123	45835124	3'UTR	C	G	7.28675	41.0842	0.0034587	yes	121.653	76.7137	0.0948708	no	0.632258	0.632258	0.0148148	0.0148148
chr17_47745668_47745669_+_G_A	(G-A)_+303_to_termination_codon	TBX21	chr17	47745668	47745669	3'UTR	G	A	478.057	32.1943	0.125166	no	59.2025	85.5466	0.0881528	no	0.529032	0.522581	0.0222222	0.0222222
chr17_73170962_73170963_+_T_C	(T-C)_+534_to_termination_codon	SSTR2	chr17	73170962	73170963	3'UTR	T	C	145.569	24.613	0.077545	no	90.3488	86.0353	0.829589	no	0.529032	0.535484	0.0444444	0.0444444
chr17_82727656_82727657_+_C_T	(C-T)_+486_to_termination_codon	FN3KRP	chr17	82727656	82727657	3'UTR	C	T					52.8769	57.6178	0.544795	no	0.445161	0.43871	0.0518519	0.0518519
chr17_82943143_82943144_+_G_A	(G-A)_+681_to_termination_codon	TBCD	chr17	82943143	82943144	3'UTR	G	A					111.644	75.1759	0.0591807	no	0.464516	0.458065	0.0666667	0.0740741
chr18_49591003_49591004_+_A_G	(G-A)_+482_to_termination_codon	LIPG	chr18	49591003	49591004	3'UTR	A	G	71.1805	219.277	0.160967	no	70.0574	75.1059	0.708448	no	0.554839	0.56129	0.0518519	0.0444444
chr19_11617986_11617987_+_A_G	(A-G)_+98_to_termination_codon	ZNF627	chr19	11617986	11617987	3'UTR	A	G	47.9823	16.7311	0.0257508	yes	73.3961	46.4418	0.00630375	no	0.425806	0.432258	0.0592593	0.0592593
chr19_19357127_19357128_+_T_C	(C-T)_+1346_to_termination_codon	MAU2	chr19	19357127	19357128	3'UTR	T	C	44.5954	12.3447	0.108617	no	97.9263	78.0275	0.342528	no	0.587097	0.593548	0.037037	0.037037
chr19_19357186_19357187_+_T_A	(T-A)_+1405_to_termination_codon	MAU2	chr19	19357186	19357187	3'UTR	T	A	73.2525	66.4356	0.960978	no	64.4418	84.9214	0.135487	no	0.625806	0.625806	0.0296296	0.0296296
chr19_19357900_19357901_+_C_G	(C-G)_+2119_to_termination_codon	MAU2	chr19	19357900	19357901	3'UTR	C	G					73.9499	110.224	0.14564	no	0.516129	0.516129	0.0444444	0.0444444
chr19_19505932_19505933_+_G_A	(G-A)_+459_to_termination_codon	GATAD2A	chr19	19505932	19505933	3'UTR	G	A	66.7223	115.641	0.543375	no	98.1265	69.9809	0.170127	no	0.43871	0.432258	0.0444444	0.0444444
chr19_19506143_19506144_+_T_G	(T-G)_+670_to_termination_codon	GATAD2A	chr19	19506143	19506144	3'UTR	T	G	109.378	78.9707	0.905513	no					0.664516	0.670968	0.0148148	0.0148148
chr19_7670410_7670411_+_G_A	(G-A)_+62_to_termination_codon	RETN	chr19	7670410	7670411	3'UTR	G	A	94.9126	530.716	0.22727	no	76.3647	83.2395	0.689641	no	0.62069	0.613793	0.024	0.024
chr20_34269191_34269192_+_A_G	(A-G)_+25_to_termination_codon	ASIP	chr20	34269191	34269192	3'UTR	A	G					73.9699	50.4574	0.205207	no	0.709677	0.716129	0.0222222	0.0222222
chr20_35176828_35176829_+_C_G	(C-G)_+16_to_termination_codon	PROCR	chr20	35176828	35176829	3'UTR	C	G	15.2152	282.936	0.13894	no					0.541935	0.541935	0.0222222	0.0222222
chr20_4725109_4725110_+_T_C	(T-C)_+28_to_termination_codon	PRND	chr20	4725109	4725110	3'UTR	T	C					154.027	91.6104	0.373141	no	0.6	0.606452	0.0222222	0.0222222
chr2_102178080_102178081_+_C_T	(C-T)_+1322_to_termination_codon	IL1R1	chr2	102178080	102178081	3'UTR	C	T	132.846	71.6787	0.864227	no	63.2148	66.5237	0.868366	no	0.587097	0.580645	0.0296296	0.0296296
chr2_186678499_186678500_+_G_C	(G-C)_+1208_to_termination_codon	ITGAV	chr2	186678499	186678500	3'UTR	G	C					60.0677	99.4977	0.0468917	no	0.380645	0.380645	0.103704	0.103704
chr2_201287057_201287058_+_T_C	(T-C)_+464_to_termination_codon	CASP8	chr2	201287057	201287058	3'UTR	T	C					96.1003	78.8442	0.344071	no	0.393548	0.4	0.111111	0.111111
chr22_29054934_29054935_+_A_G	(A-G)_+1313_to_termination_codon	ZNRF3	chr22	29054934	29054935	3'UTR	A	G					65.2018	111.585	0.088355	no	0.458065	0.464516	0.0740741	0.0666667
chr22_29055682_29055683_+_A_G	(A-G)_+2061_to_termination_codon	ZNRF3	chr22	29055682	29055683	3'UTR	A	G	428.518	10.9643	0.0253739	yes	49.4811	60.9193	0.329829	no	0.554839	0.56129	0.0444444	0.0444444
chr22_29057204_29057205_+_G_C	(C-G)_+3583_to_termination_codon	ZNRF3	chr22	29057204	29057205	3'UTR	G	C					103.334	85.9439	0.47098	no	0.316129	0.316129	0.133333	0.133333
chr22_35660680_35660681_+_G_A	(G-A)_+1085_to_termination_codon	APOL6	chr22	35660680	35660681	3'UTR	G	A	16.2994	47.3249	0.0118729	yes	88.8991	91.2756	0.90424	no	0.516129	0.509677	0.0222222	0.0222222
chr2_65083896_65083897_+_A_G	(A-G)_+1192_to_termination_codon	CEP68	chr2	65083896	65083897	3'UTR	A	G	28.1855	25.0267	0.875088	no	75.0079	87.868	0.459439	no	0.432258	0.43871	0.0592593	0.0592593
chr2_66572853_66572854_+_C_T	(C-T)_+3746_to_termination_codon	MEIS1	chr2	66572853	66572854	3'UTR	C	T					69.3045	98.3765	0.170963	no	0.335484	0.329032	0.133333	0.140741
chr3_119817733_119817734_+_C_T	(T-C)_+522_to_termination_codon	NR1I2	chr3	119817733	119817734	3'UTR	C	T					60.0195	85.1792	0.0800898	no	0.580645	0.574194	0.037037	0.037037
chr3_159995679_159995680_+_G_A	(G-A)_+121_to_termination_codon	IL12A	chr3	159995679	159995680	3'UTR	G	A					77.9712	66.9756	0.69098	no	0.412903	0.406452	0.0814815	0.0888889
chr3_7740806_7740807_+_A_T	(A-T)_+401_to_termination_codon	GRM7	chr3	7740806	7740807	3'UTR	A	T	42.6905	25.2629	0.0116539	no	79.6672	61.0095	0.113825	no	0.445161	0.445161	0.0444444	0.0444444
chr4_122893152_122893153_+_C_T	(C-T)_+757_to_termination_codon	FGF2	chr4	122893152	122893153	3'UTR	C	T	22.398	10.3501	0.146465	no	70.0728	77.1717	0.702143	no	0.458065	0.451613	0.0592593	0.0592593
chr4_122896929_122896930_+_C_G	(C-G)_+4534_to_termination_codon	FGF2	chr4	122896929	122896930	3'UTR	C	G	13.4764	32.4896	0.0260183	yes	66.9308	72.651	0.697628	no	0.335484	0.335484	0.0962963	0.0962963
chr4_147542687_147542688_+_G_C	(G-C)_+70_to_termination_codon	EDNRA	chr4	147542687	147542688	3'UTR	G	C	96.5243	42.7964	0.725786	no	90.5308	101.749	0.683129	no	0.490323	0.490323	0.037037	0.037037
chr4_147543839_147543840_+_C_T	(C-T)_+1222_to_termination_codon	EDNRA	chr4	147543839	147543840	3'UTR	C	T					114.064	90.4133	0.464939	no	0.470968	0.464516	0.0518519	0.0518519
chr4_4863148_4863149_+_C_T	(C-T)_+6_to_termination_codon	MSX1	chr4	4863148	4863149	3'UTR	C	T					65.5894	98.9982	0.0291283	no	0.651613	0.645161	0.0296296	0.0296296
chr4_6302514_6302515_+_T_C	(C-T)_+47_to_termination_codon	WFS1	chr4	6302514	6302515	3'UTR	T	C	51.6689	37.7006	0.614587	no	69.3298	81.757	0.506502	no	0.625806	0.632258	0.0148148	0.0148148
chr4_73455882_73455883_+_A_G	(A-G)_+603_to_termination_codon	AFP	chr4	73455882	73455883	3'UTR	A	G	13.723	12.4171	0.831998	no	74.281	59.769	0.149246	no	0.393548	0.4	0.103704	0.0962963
chr4_73743327_73743328_+_A_G	(A-G)_+864_to_termination_codon	CXCL8	chr4	73743327	73743328	3'UTR	A	G					84.9679	68.691	0.330813	no	0.296774	0.303226	0.111111	0.111111
chr4_87983033_87983034_+_A_G	(A-G)_+138_to_termination_codon	SPP1	chr4	87983033	87983034	3'UTR	A	G					56.5073	65.1478	0.480416	no	0.374194	0.380645	0.0888889	0.0814815
chr5_112844211_112844212_+_C_A	(C-A)_+86_to_termination_codon	APC	chr5	112844211	112844212	3'UTR	C	A					88.5822	96.2905	0.745007	no	0.348387	0.341935	0.0888889	0.0888889
chr5_128189251_128189252_+_T_A	(T-A)_+2621_to_termination_codon	SLC12A2	chr5	128189251	128189252	3'UTR	T	A	12.8138	14.9963	0.521509	no	81.2782	73.9885	0.685097	no	0.335484	0.335484	0.0962963	0.0962963
chr5_161701907_161701908_+_C_T	(C-T)_+135_to_termination_codon	GABRA6	chr5	161701907	161701908	3'UTR	C	T					68.677	166.973	0.023899	no	0.425806	0.419355	0.0592593	0.0592593
chr5_173957659_173957660_+_T_A	(A-T)_+1523_to_termination_codon	CPEB4	chr5	173957659	173957660	3'UTR	T	A	13.9977	21.299	0.451804	no	87.9503	81.1184	0.729235	no	0.36129	0.36129	0.103704	0.103704
chr6_131891553_131891554_+_A_G	(A-G)_+1043_to_termination_codon	ENPP1	chr6	131891553	131891554	3'UTR	A	G					68.4925	81.0963	0.521877	no	0.406452	0.412903	0.0888889	0.0814815
chr6_152758925_152758926_+_T_C	(T-C)_+1785_to_termination_codon	VIP	chr6	152758925	152758926	3'UTR	T	C					120.113	78.4446	0.179448	no	0.329032	0.335484	0.0814815	0.0814815
chr6_160451118_160451119_+_C_T	(C-T)_+63_to_termination_codon	SLC22A3	chr6	160451118	160451119	3'UTR	C	T	35.101	73.5034	0.0117964	yes	86.064	67.3977	0.262109	no	0.516129	0.509677	0.0444444	0.0444444
chr6_29945520_29945521_+_A_T	NM_001242758.1(HLA-A):c.*66A>T	HLA-A	chr6	29945520	29945521	3'UTR	A	T					73.6128	56.76	0.350576	no	0.509677	0.509677	0.0296296	0.037037
chr6_31588803_31588804_+_T_A	(A-T)_+128_to_termination_codon	LST1	chr6	31588803	31588804	3'UTR	T	A	15.2517	22.5321	0.56185	no	73.1867	75.3199	0.912335	no	0.451613	0.451613	0.037037	0.037037
chr6_32444702_32444703_+_G_A	(A-G)_+793_to_termination_codon	HLA-DRA	chr6	32444702	32444703	3'UTR	G	A	30.9542	88.5817	0.465444	no	74.6858	75.7093	0.948809	no	0.425806	0.419355	0.0518519	0.0518519
chr6_32642813_32642814_+_G_A	NM_002122.3:c.*20+30G>A	HLA-DQA1	chr6	32642813	32642814	3'UTR	G	A	36.5437	48.5707	0.576134	no	84.7933	82.4588	0.903604	no	0.503226	0.496774	0.0444444	0.0444444
chr6_32642813_32642814_+_G_C	NM_002122.3:c.*20+30G>C	HLA-DQA1	chr6	32642813	32642814	3'UTR	G	C	36.5437	41.9332	0.869867	no	84.7933	106.027	0.339823	no	0.503226	0.503226	0.0444444	0.0444444
chr6_32642813_32642814_+_G_T	NM_002122.3:c.*20+30G>T	HLA-DQA1	chr6	32642813	32642814	3'UTR	G	T	36.5437	11.2285	0.00235012	yes	84.7933	128.199	0.205858	no	0.503226	0.496774	0.0444444	0.0444444
chr6_32642842_32642843_+_G_A	NM_002122.3:c.*20+59G>A	HLA-DQA1	chr6	32642842	32642843	3'UTR	G	A	111.231	22.5759	0.0739072	no	60.7445	93.6821	0.045845	no	0.483871	0.477419	0.0444444	0.0444444
chr6_32642842_32642843_+_G_C	NM_002122.3:c.*20+59G>C	HLA-DQA1	chr6	32642842	32642843	3'UTR	G	C	111.231	17.2174	0.0129398	yes	60.7445	92.6273	0.0902463	no	0.483871	0.483871	0.0444444	0.0444444
chr6_32642842_32642843_+_G_T	NM_002122.3:c.*20+59G>T	HLA-DQA1	chr6	32642842	32642843	3'UTR	G	T	111.231	27.5856	0.173008	no	60.7445	58.9871	0.891099	no	0.483871	0.477419	0.0444444	0.0444444
chr6_32642843_32642844_+_C_G	NM_002122.3:c.*20+60C>G	HLA-DQA1	chr6	32642843	32642844	3'UTR	C	G	66.5825	35.1414	0.430731	no	69.2477	74.5806	0.792947	no	0.483871	0.483871	0.037037	0.037037
chr6_32643003_32643004_+_C_A	NM_002122.3:c.*73C>A	HLA-DQA1	chr6	32643003	32643004	3'UTR	C	A	45.353	44.1879	0.953772	no	92.1382	80.6984	0.599835	no	0.464516	0.458065	0.0666667	0.0666667
chr6_32643003_32643004_+_C_G	NM_002122.3:c.*73C>G	HLA-DQA1	chr6	32643003	32643004	3'UTR	C	G	45.353	33.2082	0.417538	no	92.1382	81.2817	0.571795	no	0.464516	0.464516	0.0666667	0.0666667
chr6_32643003_32643004_+_C_T	NM_002122.3:c.*73C>T	HLA-DQA1	chr6	32643003	32643004	3'UTR	C	T	45.353	35.8177	0.587867	no	92.1382	89.0759	0.874845	no	0.464516	0.458065	0.0666667	0.0666667
chr6_32643017_32643018_+_G_A	NM_002122.3:c.*87G>A	HLA-DQA1	chr6	32643017	32643018	3'UTR	G	A					76.7755	92.6477	0.480255	no	0.464516	0.458065	0.0666667	0.0666667
chr6_32643017_32643018_+_G_C	NM_002122.3:c.*87G>C	HLA-DQA1	chr6	32643017	32643018	3'UTR	G	C					76.7755	90.2359	0.517036	no	0.464516	0.464516	0.0666667	0.0666667
chr6_32643017_32643018_+_G_T	NM_002122.3:c.*87G>T	HLA-DQA1	chr6	32643017	32643018	3'UTR	G	T					76.7755	63.4425	0.419894	no	0.464516	0.458065	0.0666667	0.0740741
chr6_32643063_32643064_+_T_C	NM_002122.3:c.*133T>C	HLA-DQA1	chr6	32643063	32643064	3'UTR	T	C	13.7761	63.5039	8.7403e-06	yes	80.0912	84.2259	0.836975	no	0.458065	0.464516	0.0666667	0.0666667
chr6_32643073_32643074_+_A_C	NM_002122.3:c.*143A>C	HLA-DQA1	chr6	32643073	32643074	3'UTR	A	C					80.351	84.5992	0.825441	no	0.458065	0.464516	0.0666667	0.0666667
chr6_32643073_32643074_+_A_T	NM_002122.3:c.*143A>T	HLA-DQA1	chr6	32643073	32643074	3'UTR	A	T					80.351	87.0151	0.742161	no	0.458065	0.458065	0.0666667	0.0666667
chr6_32643114_32643115_+_A_G	NM_002122.3:c.*184A>G	HLA-DQA1	chr6	32643114	32643115	3'UTR	A	G					89.3549	91.4499	0.924346	no	0.432258	0.43871	0.0592593	0.0518519
chr6_32643194_32643195_+_G_A	NM_002122.3:c.*264G>A	HLA-DQA1	chr6	32643194	32643195	3'UTR	G	A	44.4539	9.50736	0.00058154	yes	83.4827	80.744	0.835886	no	0.432258	0.425806	0.0740741	0.0740741
chr6_32659999_32660000_+_G_C	NM_002123.4:c.*236C>G	HLA-DQB1	chr6	32659999	32660000	3'UTR	G	C	7.41678	19.4219	0.0119127	yes	86.2776	70.1779	0.43818	no	0.541935	0.541935	0.0296296	0.0296296
chr6_33086881_33086882_+_A_G	NM_002121.5:c.*348A>G	HLA-DPB1	chr6	33086881	33086882	3'UTR	A	G					90.9982	64.3006	0.136881	no	0.4	0.406452	0.103704	0.103704
chr6_33087083_33087084_+_A_G	(A-G)_+846_to_termination_codon	HLA-DPB1	chr6	33087083	33087084	3'UTR	A	G					70.5352	66.8489	0.805697	no	0.432258	0.43871	0.0962963	0.0962963
chr7_116560037_116560038_+_T_C	(T-C)_+751_to_termination_codon	CAV1	chr7	116560037	116560038	3'UTR	T	C					85.8407	93.4788	0.624621	no	0.483871	0.490323	0.0592593	0.0592593
chr7_128948945_128948946_+_T_C	NM_001098629.2(IRF5):c.*128T>C	IRF5	chr7	128948945	128948946	3'UTR	T	C					81.4254	78.9401	0.885453	no	0.606452	0.612903	0.0222222	0.0222222
chr7_128954670_128954671_+_C_T	(C-T)_+5853_to_termination_codon	IRF5	chr7	128954670	128954671	3'UTR	C	T					111.888	58.2474	0.101666	no	0.509677	0.503226	0.0444444	0.0444444
chr7_137016560_137016561_+_T_A	(T-A)_+295_to_termination_codon	CHRM2	chr7	137016560	137016561	3'UTR	T	A	80.6315	12.014	0.0158428	yes	67.3624	84.7738	0.247129	no	0.4	0.4	0.0740741	0.0740741
chr8_19966533_19966534_+_C_A	(C-A)_+1224_to_termination_codon	LPL	chr8	19966533	19966534	3'UTR	C	A					64.4955	87.2476	0.210761	no	0.380645	0.374194	0.111111	0.118519
chr8_26657941_26657942_+_T_C	(T-C)_+2236_to_termination_codon	DPYSL2	chr8	26657941	26657942	3'UTR	T	C					83.9008	80.2655	0.889035	no	0.432258	0.43871	0.0592593	0.0592593
chr9_134843427_134843428_+_A_T	(A-T)_+1125_to_termination_codon	COL5A1	chr9	134843427	134843428	3'UTR	A	T	36.6297	12.2912	0.0247621	yes	77.6648	61.1676	0.359239	no	0.522581	0.522581	0.0518519	0.0518519
chr9_69073007_69073008_+_C_T	(C-T)_+246_to_termination_codon	FXN	chr9	69073007	69073008	3'UTR	C	T	33.8226	29.1485	0.839289	no	86.7559	75.2141	0.508757	no	0.367742	0.36129	0.103704	0.103704
chrX_116173872_116173873_+_A_C	(C-A)_+501_to_termination_codon	AGTR2	chrX	116173872	116173873	3'UTR	A	C					69.1835	76.6077	0.653763	no	0.348387	0.354839	0.148148	0.148148
chrX_116459132_116459133_+_C_G	(C-G)_+178_to_termination_codon	SLC6A14	chrX	116459132	116459133	3'UTR	C	G	159.743	20.6867	0.151478	no	64.4533	75.1524	0.445748	no	0.354839	0.354839	0.0962963	0.0962963
chrX_147950017_147950018_+_C_T	(C-T)_+1174_to_termination_codon	FMR1	chrX	147950017	147950018	3'UTR	C	T	22.9008	17.2246	0.377992	no	92.456	89.6143	0.868835	no	0.341935	0.335484	0.0666667	0.0740741
chr12_14841154_14841155_+_T_C	NM_021071.3(ART4):c.145-2A>G	ART4	chr12	14841154	14841155	3'UTR	T	C					87.3707	82.5446	0.817834	no	0.4	0.406452	0.0444444	0.0444444
chr14_20892184_20892185_+_G_C	(G-C)_+16_to_termination_codon	RNASE3	chr14	20892184	20892185	3'UTR	G	C					125.698	76.6897	0.276295	no	0.509677	0.509677	0.0518519	0.0518519
chr14_72562469_72562470_+_G_A	(G-A)_+3_to_termination_codon	RGS6	chr14	72562469	72562470	3'UTR	G	A	94.7492	12.2211	0.00158201	yes					0.625806	0.619355	0.0296296	0.0296296
chr1_53910027_53910028_+_C_T	(C-T)_+29_to_termination_codon	DIO1	chr1	53910027	53910028	3'UTR	C	T	27.4961	51.7281	0.173357	no	84.1891	69.0712	0.443147	no	0.522581	0.516129	0.0518519	0.0518519
chr16_23690216_23690217_+_A_G	(G-A)_+154_to_termination_codon	PLK1	chr16	23690216	23690217	3'UTR	A	G	57.3705	21.2292	0.222718	no	70.9539	60.104	0.588082	no	0.574194	0.580645	0.0518519	0.0444444
chr2_100996105_100996106_+_C_T	(C-T)_+524_to_termination_codon	NPAS2	chr2	100996105	100996106	3'UTR	C	T	18.1958	18.9676	0.874996	no	92.5629	86.4023	0.720828	no	0.36129	0.354839	0.0814815	0.0888889
chr21_36073014_36073015_+_G_A	(G-A)_+133_to_termination_codon	CBR1	chr21	36073014	36073015	3'UTR	G	A					86.4847	77.6504	0.625546	no	0.380645	0.374194	0.118519	0.125926
chr2_203960622_203960623_+_C_T	(C-T)_+1024_to_termination_codon	ICOS	chr2	203960622	203960623	3'UTR	C	T	12.5868	13.5812	0.873506	no	66.2776	81.0036	0.290475	no	0.406452	0.4	0.0888889	0.0962963
chr3_160434907_160434908_+_A_G	(A-G)_+1099_to_termination_codon	SMC4	chr3	160434907	160434908	3'UTR	A	G					88.409	80.4749	0.761925	no	0.316129	0.322581	0.111111	0.111111
chr3_42536842_42536843_+_T_C	(T-C)_+562_to_termination_codon	VIPR1	chr3	42536842	42536843	3'UTR	T	C	22.6963	17.7572	0.504148	no	73.9259	69.4801	0.764385	no	0.451613	0.458065	0.0814815	0.0740741
chr3_42537369_42537370_+_C_T	(T-C)_+1089_to_termination_codon	VIPR1	chr3	42537369	42537370	3'UTR	C	T	14.915	17.951	0.797226	no	90.2039	77.7558	0.560611	no	0.503226	0.496774	0.0666667	0.0666667
chr6_152099061_152099062_+_C_T	(C-T)_+96_to_termination_codon	ESR1	chr6	152099061	152099062	3'UTR	C	T	36.2024	91.7795	0.17319	no	85.275	95.4848	0.67541	no	0.483871	0.477419	0.0444444	0.0444444
chr6_43785313_43785314_+_C_T	(C-T)_+752_to_termination_codon	VEGFA	chr6	43785313	43785314	3'UTR	C	T					87.9158	87.3181	0.97892	no	0.554839	0.548387	0.0296296	0.0296296
chr7_101058169_101058170_+_T_C	(T-C)_+126_to_termination_codon	MUC17	chr7	101058169	101058170	3'UTR	T	C					77.0196	93.0422	0.421697	no	0.470968	0.477419	0.0518519	0.0518519
chr7_150743625_150743626_+_A_G	(A-G)_+563_to_termination_codon	GIMAP5	chr7	150743625	150743626	3'UTR	A	G					85.0935	72.7561	0.470683	no	0.4	0.406452	0.0962963	0.0962963
chr9_134843035_134843036_+_C_A	(C-A)_+733_to_termination_codon	COL5A1	chr9	134843035	134843036	3'UTR	C	A	15.5198	311.589	0.00079312	yes	84.3705	65.6375	0.295659	no	0.522581	0.516129	0.0518519	0.0518519
chrX_148993669_148993670_+_T_C	(T-C)_+2338_to_termination_codon	AFF2	chrX	148993669	148993670	3'UTR	T	C	18.4462	25.1528	0.476914	no	84.1254	86.4247	0.894871	no	0.432258	0.43871	0.0814815	0.0740741
chrX_148994537_148994538_+_C_T	(C-T)_+3206_to_termination_codon	AFF2	chrX	148994537	148994538	3'UTR	C	T	19.562	12.0441	0.439194	no	46.1357	105.957	0.000399186	yes	0.406452	0.4	0.0666667	0.0666667
chr1_154576403_154576404_+_G_A	NM_000748.2(CHRNB2):c.*472G>A	CHRNB2	chr1	154576403	154576404	3'UTR	G	A	62.4356	691.304	0.424325	no	84.0159	104.119	0.313863	no	0.619355	0.612903	0.0222222	0.0296296
chr16_31094031_31094032_+_G_A	NM_024006.5(VKORC1):c.173+525C>T	VKORC1	chr16	31094031	31094032	3'UTR	G	A					81.5362	103.605	0.372247	no	0.522581	0.516129	0.0666667	0.0740741
chr16_31094232_31094233_+_A_C	NM_024006.5(VKORC1):c.173+324T>G	VKORC1	chr16	31094232	31094233	3'UTR	A	C					64.1516	66.8108	0.891464	no	0.63871	0.645161	0.0222222	0.0222222
chr18_673443_673449_+_TTAAAG_-	NM_001071.2(TYMS):c.*447_*452delTTAAAG	TYMS	chr18	673443	673449	3'UTR	TTAAAG	-	11.628	12.5705	0.850215	no	76.7456	63.1521	0.430129	no	0.40625	0.415584	0.0928571	0.0895522
chrM_1554_1555_+_A_G	m.1555A>G	MT-CO1;MT-RNR1	chrM	1554	1555	3'UTR	A	G	36.0059	10.9392	0.0419029	yes	74.9447	45.4121	0.0671522	no	0.458065	0.464516	0.0962963	0.0962963
chr10_102631605_102631606_+_C_T	NM_016169.3(SUFU):c.*1451C>T	SUFU	chr10	102631605	102631606	3'UTR	C	T					47.2798	75.347	0.0608248	no	0.567742	0.56129	0.0222222	0.0222222
chr10_103077232_103077233_+_G_A	NM_017649.4(CNNM2):c.*53G>A	CNNM2	chr10	103077232	103077233	3'UTR	G	A					76.3973	81.5501	0.754696	no	0.664516	0.658065	0.0222222	0.0222222
chr10_110836461_110836462_+_C_G	NM_001134363.2(RBM20):c.*484C>G	RBM20	chr10	110836461	110836462	3'UTR	C	G	56.3056	51.6942	0.842324	no	75.3471	83.4776	0.656285	no	0.56129	0.56129	0.037037	0.037037
chr10_110836962_110836963_+_G_C	NM_001134363.2(RBM20):c.*985G>C	RBM20	chr10	110836962	110836963	3'UTR	G	C	363.398	36.2054	0.089868	no	68.3346	78.387	0.529492	no	0.490323	0.490323	0.037037	0.037037
chr10_110838928_110838929_+_T_C	NM_001134363.2(RBM20):c.*2951T>C	RBM20	chr10	110838928	110838929	3'UTR	T	C	27.1472	7.42986	5.72231e-05	yes	74.6836	51.1283	0.080364	no	0.406452	0.412903	0.0814815	0.0814815
chr10_111012221_111012222_+_A_G	NM_007373.3(SHOC2):c.*404A>G	SHOC2	chr10	111012221	111012222	3'UTR	A	G	22.2035	20.6492	0.861437	no	79.9694	87.0659	0.693452	no	0.335484	0.341935	0.103704	0.0962963
chr10_111013303_111013304_+_T_TT	NM_007373.3(SHOC2):c.*1486dupT	SHOC2	chr10	111013303	111013304	3'UTR	T	TT					111.42	74.7073	0.09328	no	0.329032	0.326923	0.0962963	0.0955882
chr10_113588786_113588787_+_C_T	NM_004132.4(HABP2):c.*418C>T	HABP2	chr10	113588786	113588787	3'UTR	C	T					66.5964	94.4938	0.212731	no	0.477419	0.470968	0.0518519	0.0518519
chr10_113588835_113588836_+_C_T	NM_004132.4(HABP2):c.*467C>T	HABP2	chr10	113588835	113588836	3'UTR	C	T	14.0891	37.5255	0.0114435	yes	78.4464	74.5684	0.809679	no	0.470968	0.464516	0.0666667	0.0740741
chr10_113589407_113589408_+_T_C	NM_004132.4(HABP2):c.*1039T>C	HABP2	chr10	113589407	113589408	3'UTR	T	C					67.0994	83.3959	0.253993	no	0.548387	0.554839	0.0444444	0.0444444
chr10_123055101_123055102_+_A_G	NM_001609.3(ACADSB):c.*1337A>G	ACADSB	chr10	123055101	123055102	3'UTR	A	G	22.7524	24.5396	0.878037	no	89.4319	80.907	0.663578	no	0.36129	0.367742	0.118519	0.118519
chr10_123055684_123055685_+_G_T	NM_001609.3(ACADSB):c.*1920G>T	ACADSB	chr10	123055684	123055685	3'UTR	G	T					91.8385	81.9776	0.638533	no	0.419355	0.412903	0.0962963	0.0962963
chr10_123056103_123056104_+_G_A	NM_001609.3(ACADSB):c.*2339G>A	ACADSB	chr10	123056103	123056104	3'UTR	G	A	29.2819	11.7733	0.0164858	yes	76.8427	71.5322	0.796283	no	0.470968	0.464516	0.037037	0.0444444
chr10_123057941_123057942_+_G_A	NM_001609.3(ACADSB):c.*4177G>A	ACADSB	chr10	123057941	123057942	3'UTR	G	A	19.2129	17.187	0.721111	no	88.3487	75.2725	0.427244	no	0.367742	0.36129	0.0814815	0.0888889
chr10_13137803_13137804_+_C_G	NM_021980.4(OPTN):c.*938C>G	OPTN	chr10	13137803	13137804	3'UTR	C	G	39.8814	35.4821	0.598317	no	89.7282	73.5379	0.324035	no	0.445161	0.445161	0.0592593	0.0592593
chr10_18540345_18540345_+_-_CA	NM_201590.2(CACNB2):c.*621_*622insCA	CACNB2	chr10	18540345	18540345	3'UTR	-	CA					52.5003	76.1378	0.172632	no	0.331169	0.333333	0.149254	0.139706
chr10_26212361_26212362_+_T_-	NM_017433.4(MYO3A):c.*399delT	MYO3A	chr10	26212361	26212362	3'UTR	T	-	49.9501	45.2065	0.730569	no	77.6087	76.083	0.894198	no	0.464516	0.467532	0.037037	0.0373134
chr10_26212361_26212362_+_T_TT	NM_017433.4(MYO3A):c.*399dupT	MYO3A	chr10	26212361	26212362	3'UTR	T	TT	49.9501	38.6113	0.429988	no	77.6087	74.115	0.786537	no	0.464516	0.461538	0.037037	0.0367647
chr10_26212397_26212398_+_G_T	NM_017433.4(MYO3A):c.*435G>T	MYO3A	chr10	26212397	26212398	3'UTR	G	T	61.5863	48.949	0.601383	no	73.888	62.9919	0.437776	no	0.451613	0.445161	0.037037	0.037037
chr10_27186738_27186739_+_T_A	NM_032844.4(MASTL):c.*203T>A	MASTL	chr10	27186738	27186739	3'UTR	T	A					58.8509	74.4776	0.324853	no	0.322581	0.322581	0.111111	0.103704
chr10_27540912_27540913_+_T_C	NM_021252.4(RAB18):c.*2862T>C	RAB18	chr10	27540912	27540913	3'UTR	T	C					101.732	110.839	0.802266	no	0.464516	0.470968	0.0962963	0.0962963
chr10_43129377_43129378_+_T_C	NM_020975.5(RET):c.*1109T>C	RET	chr10	43129377	43129378	3'UTR	T	C	37.6192	28.2298	0.374088	no	85.0133	83.7957	0.942883	no	0.458065	0.464516	0.0592593	0.0518519
chr10_71363164_71363165_+_A_C	NM_018344.5(SLC29A3):c.*557A>C	SLC29A3	chr10	71363164	71363165	3'UTR	A	C					74.5275	72.9565	0.903193	no	0.548387	0.554839	0.0222222	0.0222222
chr10_72008536_72008537_+_G_T	NM_004273.4(CHST3):c.*66G>T	CHST3	chr10	72008536	72008537	3'UTR	G	T					81.3597	118.362	0.233997	no	0.670968	0.664516	0.037037	0.037037
chr10_72009321_72009322_+_T_C	NM_004273.4(CHST3):c.*851T>C	CHST3	chr10	72009321	72009322	3'UTR	T	C	663.645	91.2062	0.501768	no	76.0799	70.9561	0.691667	no	0.548387	0.554839	0.0296296	0.0296296
chr10_72009326_72009327_+_C_G	NM_004273.4(CHST3):c.*856C>G	CHST3	chr10	72009326	72009327	3'UTR	C	G	75.3974	23.9403	0.371107	no	95.7028	68.2618	0.126785	no	0.535484	0.535484	0.0296296	0.0296296
chr10_72012968_72012969_+_A_G	NM_004273.4(CHST3):c.*4498A>G	CHST3	chr10	72012968	72012969	3'UTR	A	G	10.3135	19.2199	0.300853	no	82.6725	93.7999	0.641051	no	0.541935	0.548387	0.0444444	0.0444444
chr10_74118866_74118867_+_C_A	NM_014000.2(VCL):c.*698C>A	VCL	chr10	74118866	74118867	3'UTR	C	A					61.4216	92.4066	0.208547	no	0.477419	0.470968	0.0592593	0.0592593
chr10_74119311_74119312_+_A_G	NM_014000.2(VCL):c.*1143A>G	VCL	chr10	74119311	74119312	3'UTR	A	G	38.4714	89.1383	0.301436	no	85.7632	84.4424	0.947648	no	0.483871	0.490323	0.0592593	0.0592593
chr10_74119929_74119930_+_A_G	NM_014000.2(VCL):c.*1761A>G	VCL	chr10	74119929	74119930	3'UTR	A	G	28.6335	10.1233	0.000877067	yes	71.9205	75.2554	0.845436	no	0.425806	0.432258	0.0592593	0.0592593
chr10_74120029_74120031_+_AA_AAAA	NM_014000.2(VCL):c.*1861_*1862dupAA	VCL	chr10	74120029	74120031	3'UTR	AA	AAAA					46.4617	61.1665	0.129174	no	0.371795	0.367089	0.0735294	0.0724638
chr10_74708601_74708602_+_G_A	NM_001123.3(ADK):c.*157G>A	ADK	chr10	74708601	74708602	3'UTR	G	A					80.5721	77.3699	0.848138	no	0.348387	0.341935	0.133333	0.140741
chr10_86924464_86924465_+_A_G	NM_004329.2(BMPR1A):c.*746A>G	BMPR1A	chr10	86924464	86924465	3'UTR	A	G					84.075	96.4797	0.651091	no	0.412903	0.419355	0.0518519	0.0518519
chr10_87966644_87966645_+_G_A	NM_000314.6(PTEN):c.*1173G>A	PTEN	chr10	87966644	87966645	3'UTR	G	A	42.4013	17.1242	0.0963443	no	92.201	69.6977	0.228263	no	0.393548	0.387097	0.0666667	0.0666667
chr10_87967000_87967001_+_C_T	NM_000314.6(PTEN):c.*1529C>T	PTEN	chr10	87967000	87967001	3'UTR	C	T					57.3079	53.4259	0.71456	no	0.425806	0.419355	0.0740741	0.0740741
chr10_87968376_87968377_+_G_C	NM_000314.6(PTEN):c.*2905G>C	PTEN	chr10	87968376	87968377	3'UTR	G	C	27.5141	25.9885	0.914576	no	82.2029	65.7926	0.284835	no	0.451613	0.451613	0.0666667	0.0666667
chr10_89014623_89014624_+_A_G	NM_000043.5(FAS):c.*174A>G	FAS	chr10	89014623	89014624	3'UTR	A	G	28.0956	20.531	0.253511	no	85.8392	84.1056	0.917625	no	0.412903	0.419355	0.0666667	0.0666667
chr10_93665664_93665665_+_A_C	NM_006204.3(PDE6C):c.*247A>C	PDE6C	chr10	93665664	93665665	3'UTR	A	C					103.546	64.8979	0.0253732	no	0.36129	0.367742	0.0814815	0.0814815
chr10_97612012_97612013_+_T_TT	NM_138413.3(HOGA1):c.*354dupT	HOGA1	chr10	97612012	97612013	3'UTR	T	TT	22.1562	45.4114	0.199121	no	68.9018	75.6155	0.656491	no	0.470968	0.467949	0.0296296	0.0294118
chr10_97612041_97612043_+_AG_-	NM_138413.3(HOGA1):c.*383_*384delAG	HOGA1	chr10	97612041	97612043	3'UTR	AG	-					81.6021	92.3106	0.532076	no	0.474359	0.474026	0.0294118	0.0298507
chr10_99709596_99709597_+_T_C	NM_004376.5(COX15):c.*3817A>G	COX15	chr10	99709596	99709597	3'UTR	T	C					94.7275	83.9703	0.599297	no	0.374194	0.380645	0.103704	0.103704
chr10_99710571_99710572_+_A_G	NM_004376.6(COX15):c.*2842T>C	COX15	chr10	99710571	99710572	3'UTR	A	G	47.0896	28.2351	0.26881	no	84.6132	70.7711	0.446718	no	0.374194	0.380645	0.0592593	0.0592593
chr1_10379329_10379330_+_G_A	NM_015074.3(KIF1B):c.*2743G>A	KIF1B	chr1	10379329	10379330	3'UTR	G	A	38.4282	337.174	0.058543	yes	66.8519	85.5662	0.196462	no	0.535484	0.529032	0.0444444	0.0518519
chr1_10380004_10380005_+_C_T	NM_015074.3(KIF1B):c.*3418C>T	KIF1B	chr1	10380004	10380005	3'UTR	C	T	18.5567	36.5562	0.0636964	no	75.0862	88.3649	0.392865	no	0.412903	0.406452	0.0740741	0.0740741
chr1_11023319_11023320_+_G_A	NM_007375.3(TARDBP):c.*666G>A	TARDBP	chr1	11023319	11023320	3'UTR	G	A	30.6932	34.7809	0.612442	no	77.0227	89.7457	0.42212	no	0.470968	0.464516	0.0592593	0.0592593
chr1_11024658_11024659_+_T_C	NM_007375.3(TARDBP):c.*2005T>C	TARDBP	chr1	11024658	11024659	3'UTR	T	C	78.9065	29.7865	0.0495902	yes	69.302	58.2531	0.379355	no	0.496774	0.503226	0.0592593	0.0592593
chr1_11025426_11025427_+_A_G	NM_007375.3(TARDBP):c.*2773A>G	TARDBP	chr1	11025426	11025427	3'UTR	A	G					77.8925	78.8682	0.949076	no	0.290323	0.296774	0.0888889	0.0888889
chr1_11025482_11025483_+_T_TT	NM_007375.3(TARDBP):c.*2829dupT	TARDBP	chr1	11025482	11025483	3'UTR	T	TT					80.2927	88.3804	0.704014	no	0.309677	0.307692	0.0814815	0.0808824
chr11_108367078_108367079_+_C_T	NM_000051.3(ATM):c.*1571C>T	ATM	chr11	108367078	108367079	3'UTR	C	T					75.6333	114.927	0.100228	no	0.574194	0.567742	0.0296296	0.0296296
chr11_108368643_108368644_+_A_G	NM_000051.3(ATM):c.*3136A>G	ATM	chr11	108368643	108368644	3'UTR	A	G	53.9802	13.2215	0.00648085	yes					0.419355	0.425806	0.0592593	0.0592593
chr11_112062702_112062703_+_G_A	NM_001931.4(DLAT):c.*168G>A	DLAT	chr11	112062702	112062703	3'UTR	G	A	59.1599	11.0164	0.00700419	yes	55.3666	85.5055	0.0522866	no	0.374194	0.367742	0.103704	0.103704
chr11_112062754_112062755_+_T_C	NM_001931.4(DLAT):c.*220T>C	DLAT	chr11	112062754	112062755	3'UTR	T	C					98.9291	71.981	0.153371	no	0.43871	0.445161	0.0962963	0.0962963
chr11_118000698_118000699_+_A_G	NM_001558.3(IL10RA):c.*1058A>G	IL10RA	chr11	118000698	118000699	3'UTR	A	G	111.037	26.6607	0.0722851	no	68.2607	83.589	0.375459	no	0.509677	0.516129	0.0518519	0.0518519
chr11_119301745_119301746_+_G_A	NM_005188.3(CBL):c.*1965G>A	CBL	chr11	119301745	119301746	3'UTR	G	A					77.6723	72.1382	0.81451	no	0.535484	0.529032	0.0592593	0.0592593
chr11_119301917_119301918_+_C_T	NM_005188.3(CBL):c.*2137C>T	CBL	chr11	119301917	119301918	3'UTR	C	T	21.4588	15.5303	0.370475	no	86.1684	83.2159	0.912425	no	0.387097	0.380645	0.0888889	0.0888889
chr11_119304643_119304644_+_T_TT	NM_005188.3(CBL):c.*4863dupT	CBL	chr11	119304643	119304644	3'UTR	T	TT	90.5925	42.4708	0.382475	no	77.2824	67.8741	0.505697	no	0.470968	0.467949	0.0296296	0.0294118
chr11_119305551_119305552_+_T_A	NM_005188.3(CBL):c.*5771T>A	CBL	chr11	119305551	119305552	3'UTR	T	A					69.9565	73.2215	0.782952	no	0.541935	0.541935	0.0518519	0.0592593
chr11_119305955_119305956_+_A_G	NM_005188.3(CBL):c.*6175A>G	CBL	chr11	119305955	119305956	3'UTR	A	G					99.7059	90.2785	0.645364	no	0.490323	0.496774	0.0592593	0.0592593
chr11_119306760_119306761_+_T_C	NM_005188.3(CBL):c.*6980T>C	CBL	chr11	119306760	119306761	3'UTR	T	C					81.2113	54.9692	0.0915641	no	0.522581	0.529032	0.037037	0.037037
chr11_119306861_119306862_+_T_G	NM_005188.3(CBL):c.*7081T>G	CBL	chr11	119306861	119306862	3'UTR	T	G					104.341	80.5513	0.375398	no	0.470968	0.477419	0.0740741	0.0740741
chr11_121309371_121309372_+_A_G	NM_006918.4(SC5D):c.*1860A>G	SC5D	chr11	121309371	121309372	3'UTR	A	G					139.234	94.2314	0.133112	no	0.548387	0.554839	0.0296296	0.0296296
chr11_121309694_121309695_+_C_G	NM_006918.4(SC5D):c.*2183C>G	SC5D	chr11	121309694	121309695	3'UTR	C	G					76.7822	75.33	0.949406	no	0.464516	0.464516	0.0740741	0.0740741
chr11_121311176_121311177_+_C_T	NM_006918.4(SC5D):c.*3665C>T	SC5D	chr11	121311176	121311177	3'UTR	C	T					112.229	76.8019	0.291666	no	0.36129	0.354839	0.0888889	0.0962963
chr11_121311466_121311467_+_C_T	NM_006918.4(SC5D):c.*3955C>T	SC5D	chr11	121311466	121311467	3'UTR	C	T	38.9727	20.4023	0.34971	no	83.4678	71.4492	0.610923	no	0.432258	0.425806	0.0740741	0.0814815
chr11_121312840_121312841_+_G_C	NM_006918.4(SC5D):c.*5329G>C	SC5D	chr11	121312840	121312841	3'UTR	G	C					97.547	68.3956	0.141002	no	0.367742	0.367742	0.118519	0.118519
chr11_121313045_121313046_+_C_G	NM_006918.4(SC5D):c.*5534C>G	SC5D	chr11	121313045	121313046	3'UTR	C	G	36.726	19.634	0.293595	no	75.9344	71.8404	0.78343	no	0.425806	0.425806	0.0666667	0.0666667
chr11_121313345_121313346_+_A_G	NM_006918.4(SC5D):c.*5834A>G	SC5D	chr11	121313345	121313346	3'UTR	A	G	29.6199	22.2079	0.316677	no	81.7271	100.54	0.332326	no	0.36129	0.367742	0.111111	0.111111
chr11_124881360_124881361_+_C_T	NM_022370.3(ROBO3):c.*111C>T	ROBO3	chr11	124881360	124881361	3'UTR	C	T					63.3453	56.8247	0.702089	no	0.516129	0.509677	0.0296296	0.0296296
chr11_124920194_124920195_+_C_T	NM_152722.4(HEPACAM):c.*943G>A	HEPACAM	chr11	124920194	124920195	3'UTR	C	T					162.309	66.3355	0.00262791	no	0.483871	0.477419	0.037037	0.037037
chr11_125958565_125958567_+_TG_-	NM_016952.4(CDON):c.*2375_*2376delCA	CDON	chr11	125958565	125958567	3'UTR	TG	-					55.6937	57.1663	0.919348	no	0.333333	0.331169	0.198529	0.201493
chr11_126277847_126277848_+_C_T	NM_017547.3(FOXRED1):c.*159C>T	FOXRED1	chr11	126277847	126277848	3'UTR	C	T					70.8022	87.5963	0.348568	no	0.6	0.593548	0.037037	0.0444444
chr1_11287556_11287557_+_C_T	NM_013319.2(UBIAD1):c.*1426C>T	UBIAD1	chr1	11287556	11287557	3'UTR	C	T	11.4703	25.2427	0.0237994	yes	70.8833	85.5672	0.359429	no	0.412903	0.406452	0.0814815	0.0814815
chr11_128917397_128917398_+_C_T	NM_000890.3(KCNJ5):c.*667C>T	KCNJ5	chr11	128917397	128917398	3'UTR	C	T	22.4277	29.3346	0.753547	no	66.6856	73.3096	0.57155	no	0.522581	0.516129	0.0592593	0.0592593
chr11_128917754_128917755_+_A_G	NM_000890.3(KCNJ5):c.*1024A>G	KCNJ5	chr11	128917754	128917755	3'UTR	A	G					79.3919	54.8244	0.138357	no	0.529032	0.535484	0.0222222	0.0222222
chr11_128918053_128918054_+_C_-	NM_000890.4(KCNJ5):c.*1323delC	KCNJ5	chr11	128918053	128918054	3'UTR	C	-	25.2953	34.8149	0.802306	no					0.522581	0.519481	0.0148148	0.0223881
chr1_115692834_115692835_+_T_C	NM_138959.2(VANGL1):c.*1456T>C	VANGL1	chr1	115692834	115692835	3'UTR	T	C					59.522	79.7146	0.140684	no	0.470968	0.477419	0.0518519	0.0518519
chr1_115693838_115693839_+_C_T	NM_138959.2(VANGL1):c.*2460C>T	VANGL1	chr1	115693838	115693839	3'UTR	C	T	16.9955	40.9564	0.0688542	no	92.0954	82.0611	0.593474	no	0.432258	0.425806	0.0740741	0.0740741
chr1_115695841_115695842_+_A_G	NM_138959.2(VANGL1):c.*4463A>G	VANGL1	chr1	115695841	115695842	3'UTR	A	G					86.3142	104.975	0.556557	no	0.451613	0.458065	0.0592593	0.0518519
chr1_119744205_119744205_+_-_GTAG	NM_006623.3(PHGDH):c.*165_*166insGTAG	PHGDH	chr1	119744205	119744205	3'UTR	-	GTAG					73.3516	57.9862	0.266591	no	0.512987	0.512658	0.0671642	0.0724638
chr1_11974955_11974956_+_C_G	NM_000302.3(PLOD1):c.*148C>G	PLOD1	chr1	11974955	11974956	3'UTR	C	G	373.007	32.2639	0.148299	no	114.55	106.937	0.80099	no	0.548387	0.548387	0.0222222	0.0222222
chr1_12012499_12012500_+_G_T	NM_014874.3(MFN2):c.*935G>T	MFN2	chr1	12012499	12012500	3'UTR	G	T					105.607	124.95	0.578779	no	0.619355	0.612903	0.0222222	0.0222222
chr11_22279878_22279880_+_CT_-	NM_213599.2(ANO5):c.*114_*115delCT	ANO5	chr11	22279878	22279880	3'UTR	CT	-	21.6151	18.8418	0.690086	no	71.3512	63.0228	0.574431	no	0.371795	0.37013	0.0661765	0.0671642
chr11_22281731_22281732_+_G_A	NM_213599.2(ANO5):c.*1967G>A	ANO5	chr11	22281731	22281732	3'UTR	G	A					88.7784	76.0133	0.569274	no	0.322581	0.316129	0.125926	0.133333
chr11_22282332_22282333_+_T_A	NM_213599.2(ANO5):c.*2568T>A	ANO5	chr11	22282332	22282333	3'UTR	T	A					73.624	61.658	0.353559	no	0.406452	0.406452	0.0592593	0.0592593
chr11_2848899_2848900_+_G_T	NM_000218.2(KCNQ1):c.*897G>T	KCNQ1	chr11	2848899	2848900	3'UTR	G	T	13.4629	17.7416	0.451624	no	87.031	95.7012	0.749703	no	0.412903	0.406452	0.0666667	0.0666667
chr11_2849057_2849058_+_C_T	NM_000218.2(KCNQ1):c.*1055C>T	KCNQ1	chr11	2849057	2849058	3'UTR	C	T	248.368	216.836	0.958474	no	96.4925	122.706	0.266861	no	0.6	0.593548	0.0296296	0.0296296
chr11_31787540_31787541_+_A_G	NM_000280.4(PAX6):c.*2393T>C	PAX6	chr11	31787540	31787541	3'UTR	A	G	8082.95	136.969	0.610644	no	73.3058	62.0772	0.440373	no	0.554839	0.56129	0.037037	0.037037
chr11_31789750_31789751_+_T_TT	NM_000280.4(PAX6):c.*183dupA	PAX6	chr11	31789750	31789751	3'UTR	T	TT					69.2336	65.5054	0.759458	no	0.425806	0.423077	0.0666667	0.0661765
chr11_34995914_34995915_+_G_A	NM_003477.2(PDHX):c.*743G>A	PDHX	chr11	34995914	34995915	3'UTR	G	A	11.5654	18.0031	0.257712	no	93.0834	82.166	0.496938	no	0.36129	0.354839	0.103704	0.103704
chr11_44244654_44244655_+_C_T	NM_207122.1(EXT2):c.*368C>T	EXT2	chr11	44244654	44244655	3'UTR	C	T					91.5335	86.6168	0.802784	no	0.496774	0.490323	0.0444444	0.0444444
chr11_46739451_46739452_+_G_T	NM_000506.4(F2):c.*44G>T	F2	chr11	46739451	46739452	3'UTR	G	T					57.3326	78.8726	0.167428	no	0.471429	0.464286	0.0583333	0.0666667
chr1_151340665_151340665_+_-_AAT	NM_000449.3(RFX5):c.*1520_*1521insATT	RFX5	chr1	151340665	151340665	3'UTR	-	AAT					82.1127	101.723	0.395791	no	0.311688	0.305732	0.171642	0.167883
chr1_156177175_156177176_+_C_T	NM_022367.3(SEMA4A):c.*179C>T	SEMA4A	chr1	156177175	156177176	3'UTR	C	T	24.4543	126.981	0.244026	no	62.285	82.7772	0.159426	no	0.554839	0.548387	0.0518519	0.0518519
chr1_158611131_158611133_+_CA_-	NM_003126.3(SPTA1):c.*131_*132delTG	SPTA1	chr1	158611131	158611133	3'UTR	CA	-	45.9135	37.81	0.627833	no	64.3108	54.5367	0.445639	no	0.442308	0.441558	0.0588235	0.0597015
chr1_158611166_158611166_+_-_ACACAT	NM_003126.3(SPTA1):c.*97_*98insATGTGT	SPTA1	chr1	158611166	158611166	3'UTR	-	ACACAT					57.4467	100.785	0.024449	no	0.487013	0.48125	0.0522388	0.05
chr1_161214300_161214301_+_A_T	NM_004550.4(NDUFS2):c.*108A>T	NDUFS2	chr1	161214300	161214301	3'UTR	A	T					89.5033	49.3143	0.0344823	no	0.470968	0.470968	0.0444444	0.037037
chr1_161364131_161364132_+_A_G	NM_003001.3(SDHC):c.*1699A>G	SDHC	chr1	161364131	161364132	3'UTR	A	G	35.1084	10.3658	0.00847168	yes	67.2669	85.602	0.28585	no	0.445161	0.451613	0.0666667	0.0666667
chr1_161364216_161364217_+_G_C	NM_003001.3(SDHC):c.*1784G>C	SDHC	chr1	161364216	161364217	3'UTR	G	C	29.7802	449.355	0.00512515	yes	63.0103	52.5076	0.455082	no	0.477419	0.477419	0.0518519	0.0518519
chr1_161364321_161364322_+_T_C	NM_003001.3(SDHC):c.*1889T>C	SDHC	chr1	161364321	161364322	3'UTR	T	C					89.4313	69.4314	0.231062	no	0.367742	0.374194	0.103704	0.103704
chr11_61398522_61398523_+_C_T	NM_001173990.2(TMEM216):c.*247C>T	TMEM216	chr11	61398522	61398523	3'UTR	C	T	29.6821	102.661	0.277334	no	45.2603	85.3767	0.0021343	no	0.541935	0.535484	0.0444444	0.0444444
chr11_61446242_61446243_+_A_-	NM_017841.2(SDHAF2):c.*172delA	SDHAF2	chr11	61446242	61446243	3'UTR	A	-					77.8324	82.1197	0.850227	no	0.458065	0.461039	0.0518519	0.0522388
chr11_61964076_61964077_+_T_C	NM_004183.3(BEST1):c.1740-27T>C	BEST1	chr11	61964076	61964077	3'UTR	T	C	18.7834	41.3001	0.0650253	yes	79.9851	73.0178	0.65817	no	0.43871	0.445161	0.0814815	0.0814815
chr11_61964210_61964211_+_G_GG	NM_004183.3(BEST1):c.*88_*89insG	BEST1	chr11	61964210	61964211	3'UTR	G	GG					91.3047	77.8426	0.565794	no	0.490323	0.49359	0.0592593	0.0588235
chr11_64602166_64602167_+_T_C	NM_144585.3(SLC22A12):c.*616T>C	SLC22A12	chr11	64602166	64602167	3'UTR	T	C					78.6808	147.995	0.0466262	no	0.612903	0.619355	0.037037	0.037037
chr11_66003948_66003949_+_G_A	NM_001143985.1(BANF1):c.*177G>A	BANF1	chr11	66003948	66003949	3'UTR	G	A	90.4559	61.5781	0.471175	no	77.4773	58.5012	0.0645907	no	0.509677	0.503226	0.0296296	0.0296296
chr11_66532509_66532510_+_C_T	NM_024649.4(BBS1):c.*473C>T	BBS1	chr11	66532509	66532510	3'UTR	C	T	62.0915	29.3807	0.282487	no	107.272	68.7998	0.116772	no	0.574194	0.567742	0.0222222	0.0222222
chr11_67461701_67461702_+_C_T	NM_145200.3(CABP4):c.*3043C>T	CABP4	chr11	67461701	67461702	3'UTR	C	T					92.9721	72.2002	0.361114	no	0.4	0.393548	0.0740741	0.0814815
chr1_170553279_170553280_+_A_G	NM_152281.2(GORAB):c.*818A>G	GORAB	chr1	170553279	170553280	3'UTR	A	G	13.8685	23.2636	0.0930245	no	83.9751	87.4894	0.839831	no	0.341935	0.348387	0.103704	0.0962963
chr1_170553524_170553525_+_T_A	NM_152281.2(GORAB):c.*1063T>A	GORAB	chr1	170553524	170553525	3'UTR	T	A					53.9998	63.8473	0.527385	no	0.296774	0.296774	0.111111	0.118519
chr11_72110109_72110110_+_G_A	NM_001145308.4(LRTOMT):c.*1185G>A	LRTOMT	chr11	72110109	72110110	3'UTR	G	A	65.0099	9.24747	0.00465843	yes	50.9467	74.6715	0.0504129	no	0.529032	0.522581	0.0444444	0.0444444
chr1_172666644_172666648_+_GTGT_-	NM_000639.2(FASLG):c.*629_*632delGTGT	FASLG	chr1	172666644	172666648	3'UTR	GTGT	-					52.9936	52.8814	0.991472	no	0.436709	0.435065	0.0869565	0.0895522
chr1_173858135_173858136_+_G_A	NM_018122.4(DARS2):c.*431G>A	DARS2	chr1	173858135	173858136	3'UTR	G	A					69.8016	64.3005	0.720083	no	0.4	0.393548	0.0888889	0.0888889
chr11_74455741_74455742_+_T_G	NM_005472.4(KCNE3):c.*1510A>C	KCNE3	chr11	74455741	74455742	3'UTR	T	G					70.7637	65.008	0.716884	no	0.387097	0.393548	0.0814815	0.0814815
chr11_75572638_75572639_+_G_A	NM_001235.3(SERPINH1):c.*556G>A	SERPINH1	chr11	75572638	75572639	3'UTR	G	A	131.015	112.991	0.776439	no	69.3856	75.4466	0.7252	no	0.496774	0.490323	0.0296296	0.0296296
chr1_183244029_183244030_+_C_G	NM_005562.2(LAMC2):c.*630C>G	LAMC2	chr1	183244029	183244030	3'UTR	C	G	198.651	21.4534	0.140458	no	81.4036	59.2689	0.16804	no	0.522581	0.522581	0.037037	0.037037
chr1_183244247_183244248_+_C_T	NM_005562.2(LAMC2):c.*848C>T	LAMC2	chr1	183244247	183244248	3'UTR	C	T	17.283	8.30905	0.0719302	no	78.4902	94.2477	0.462659	no	0.380645	0.374194	0.0814815	0.0814815
chr1_183244723_183244724_+_C_T	NM_005562.2(LAMC2):c.*1324C>T	LAMC2	chr1	183244723	183244724	3'UTR	C	T	24.2186	61.2887	0.447761	no	51.6496	103.389	0.00600166	no	0.483871	0.477419	0.037037	0.037037
chr1_183245046_183245047_+_A_G	NM_005562.2(LAMC2):c.*1647A>G	LAMC2	chr1	183245046	183245047	3'UTR	A	G	63.957	73.1608	0.699708	no	83.002	92.46	0.629694	no	0.451613	0.458065	0.0592593	0.0592593
chr1_193252544_193252545_+_A_G	NM_024529.4(CDC73):c.*1833A>G	CDC73	chr1	193252544	193252545	3'UTR	A	G					70.8777	68.4542	0.825381	no	0.348387	0.354839	0.103704	0.0962963
chr1_193253166_193253167_+_C_T	NM_024529.4(CDC73):c.*2455C>T	CDC73	chr1	193253166	193253167	3'UTR	C	T	32.0259	51.4061	0.18478	no	67.0265	87.6481	0.228894	no	0.406452	0.4	0.0592593	0.0592593
chr1_193254502_193254503_+_T_C	NM_024529.4(CDC73):c.*3791T>C	CDC73	chr1	193254502	193254503	3'UTR	T	C	23.4865	17.602	0.39672	no	77.9212	67.9527	0.566869	no	0.4	0.406452	0.0740741	0.0666667
chr1_197009427_197009428_+_C_A	NM_030787.3(CFHR5):c.*745C>A	CFHR5	chr1	197009427	197009428	3'UTR	C	A	30.4158	55.7856	0.395743	no	84.3272	62.4293	0.209501	no	0.374194	0.367742	0.0888889	0.0962963
chr1_197478036_197478037_+_G_T	NM_201253.2(CRB1):c.*158G>T	CRB1	chr1	197478036	197478037	3'UTR	G	T	20.6162	9.74862	0.0960152	no	83.4358	65.1447	0.350399	no	0.412903	0.406452	0.0740741	0.0740741
chr1_201330096_201330097_+_C_A	NM_001005337.2(PKP1):c.*56C>A	PKP1	chr1	201330096	201330097	3'UTR	C	A	9.90626	60.3274	0.00136881	yes	76.0139	91.6101	0.497889	no	0.490323	0.483871	0.0444444	0.0444444
chr1_201330758_201330759_+_T_C	NM_001005337.2(PKP1):c.*718T>C	PKP1	chr1	201330758	201330759	3'UTR	T	C	72.6127	34.4988	0.586183	no	69.8955	88.3619	0.353881	no	0.56129	0.567742	0.037037	0.037037
chr1_201331605_201331606_+_C_T	NM_001005337.2(PKP1):c.*1565C>T	PKP1	chr1	201331605	201331606	3'UTR	C	T					103.347	72.8064	0.227781	no	0.541935	0.535484	0.0444444	0.0444444
chr12_100421464_100421465_+_C_T	NM_139319.2(SLC17A8):c.*1306C>T	SLC17A8	chr12	100421464	100421465	3'UTR	C	T					98.829	81.1155	0.421476	no	0.348387	0.341935	0.111111	0.111111
chr12_100421745_100421746_+_A_G	NM_139319.2(SLC17A8):c.*1587A>G	SLC17A8	chr12	100421745	100421746	3'UTR	A	G					110.805	92.8699	0.544621	no	0.387097	0.393548	0.103704	0.103704
chr12_101685807_101685808_+_A_AA	NM_002465.3(MYBPC1):c.*246dupA	MYBPC1	chr12	101685807	101685808	3'UTR	A	AA	68.8025	13.0598	0.0884584	no					0.393548	0.391026	0.037037	0.0367647
chr12_102397966_102397967_+_G_A	NM_000618.4(IGF1):c.*4540C>T	IGF1	chr12	102397966	102397967	3'UTR	G	A	80.1056	8.98335	6.76018e-06	yes	91.8475	87.0984	0.814634	no	0.341935	0.335484	0.133333	0.133333
chr12_102400129_102400130_+_T_TT	NM_000618.4(IGF1):c.*2377dupA	IGF1	chr12	102400129	102400130	3'UTR	T	TT	85.0009	85.0847	0.999363	no	66.7821	72.3648	0.739934	no	0.464516	0.461538	0.037037	0.0367647
chr12_102400131_102400132_+_T_-	NM_000618.4(IGF1):c.*2375delA	IGF1	chr12	102400131	102400132	3'UTR	T	-	24.6201	38.518	0.571293	no	64.7463	49.5417	0.0736385	no	0.470968	0.474026	0.037037	0.0373134
chr12_102401187_102401188_+_T_C	NM_000618.4(IGF1):c.*1319A>G	IGF1	chr12	102401187	102401188	3'UTR	T	C	33.7506	28.0929	0.734211	no	87.2183	88.9674	0.945239	no	0.445161	0.451613	0.0740741	0.0740741
chr12_106509786_106509787_+_T_C	NM_018082.5(POLR3B):c.*238T>C	POLR3B	chr12	106509786	106509787	3'UTR	T	C					85.4621	60.1491	0.121204	no	0.477419	0.483871	0.0592593	0.0592593
chr12_109110468_109110469_+_C_G	NM_080911.2(UNG):c.*500C>G	UNG	chr12	109110468	109110469	3'UTR	C	G	77.2358	23.7847	0.205102	no	70.6946	109.748	0.0707281	no	0.529032	0.529032	0.0296296	0.0296296
chr12_109110505_109110506_+_G_A	NM_080911.2(UNG):c.*537G>A	UNG	chr12	109110505	109110506	3'UTR	G	A	66.7684	37.3182	0.285976	no	80.3805	80.8733	0.975372	no	0.490323	0.483871	0.0518519	0.0518519
chr12_109110513_109110514_+_A_G	NM_080911.2(UNG):c.*545A>G	UNG	chr12	109110513	109110514	3'UTR	A	G	28.1015	20.4818	0.492056	no	86.404	101.754	0.459968	no	0.477419	0.483871	0.0592593	0.0592593
chr12_109110579_109110580_+_C_T	NM_080911.2(UNG):c.*611C>T	UNG	chr12	109110579	109110580	3'UTR	C	T	39.9202	19.2666	0.0913899	no	49.3263	93.0574	0.00454127	no	0.451613	0.445161	0.0740741	0.0740741
chr12_110351068_110351069_+_G_A	NM_001681.3(ATP2A2):c.*764G>A	ATP2A2	chr12	110351068	110351069	3'UTR	G	A					106.891	65.5649	0.0641954	no	0.412903	0.406452	0.0814815	0.0814815
chr12_112507327_112507328_+_T_C	NM_002834.4(PTPN11):c.*1536T>C	PTPN11	chr12	112507327	112507328	3'UTR	T	C	17.7305	15.9978	0.870646	no	77.1653	71.8922	0.668716	no	0.509677	0.516129	0.037037	0.037037
chr12_112509035_112509036_+_A_G	NM_002834.4(PTPN11):c.*3244A>G	PTPN11	chr12	112509035	112509036	3'UTR	A	G	18.231	44.7509	0.312122	no	94.3121	54.2359	0.0309113	no	0.432258	0.43871	0.0814815	0.0814815
chr12_112509511_112509512_+_T_C	NM_002834.4(PTPN11):c.*3720T>C	PTPN11	chr12	112509511	112509512	3'UTR	T	C					97.3871	86.2681	0.646509	no	0.36129	0.367742	0.133333	0.125926
chr12_112509810_112509811_+_C_T	NM_002834.4(PTPN11):c.*4019C>T	PTPN11	chr12	112509810	112509811	3'UTR	C	T					97.1021	67.8089	0.186685	no	0.412903	0.406452	0.111111	0.111111
chr12_119194505_119194506_+_A_G	NM_014365.2(HSPB8):c.*648A>G	HSPB8	chr12	119194505	119194506	3'UTR	A	G	44.0929	35.7416	0.5318	no	71.7597	76.4516	0.751302	no	0.516129	0.522581	0.0592593	0.0518519
chr12_120739647_120739648_+_C_T	NM_000017.3(ACADS):c.*200C>T	ACADS	chr12	120739647	120739648	3'UTR	C	T	32.1776	81.9831	0.183615	no	100.845	103.869	0.893221	no	0.619355	0.612903	0.0222222	0.0222222
chr12_121001361_121001362_+_C_T	NM_000545.6(HNF1A):c.*170C>T	HNF1A	chr12	121001361	121001362	3'UTR	C	T	27.6655	31.0506	0.823347	no	81.8766	100.107	0.325805	no	0.632258	0.625806	0.0222222	0.0222222
chr12_123759630_123759631_+_C_T	NM_012463.3(ATP6V0A2):c.*1599C>T	ATP6V0A2	chr12	123759630	123759631	3'UTR	C	T	56.2301	40.0808	0.590112	no	77.5897	80.7206	0.816779	no	0.464516	0.458065	0.0592593	0.0592593
chr12_123760192_123760193_+_C_G	NM_012463.3(ATP6V0A2):c.*2161C>G	ATP6V0A2	chr12	123760192	123760193	3'UTR	C	G					93.5657	92.8812	0.969084	no	0.445161	0.445161	0.0888889	0.0888889
chr12_123761696_123761697_+_T_G	NM_012463.3(ATP6V0A2):c.*3665T>G	ATP6V0A2	chr12	123761696	123761697	3'UTR	T	G					65.3465	79.4875	0.305424	no	0.354839	0.36129	0.103704	0.103704
chr12_12722099_12722100_+_C_T	NM_004064.4(CDKN1B):c.*1073C>T	CDKN1B	chr12	12722099	12722100	3'UTR	C	T					89.1025	70.1123	0.212054	no	0.335484	0.329032	0.111111	0.118519
chr1_212898887_212898888_+_G_C	NM_014053.3(FLVCR1):c.*3598G>C	FLVCR1	chr1	212898887	212898888	3'UTR	G	C					77.2228	63.6678	0.470877	no	0.406452	0.406452	0.125926	0.125926
chr12_20916465_20916466_+_G_A	NM_019844.3(SLCO1B3):c.*219G>A	SLCO1B3	chr12	20916465	20916466	3'UTR	G	A					88.3892	85.3222	0.918758	no	0.36129	0.354839	0.118519	0.125926
chr12_20916856_20916857_+_A_G	NM_019844.3(SLCO1B3):c.*610A>G	SLCO1B3	chr12	20916856	20916857	3'UTR	A	G	22.5358	28.6247	0.7591	no	58.0082	138.63	0.00765818	no	0.387097	0.393548	0.0962963	0.0888889
chr12_2692175_2692176_+_A_G	NM_000719.6(CACNA1C):c.*977A>G	CACNA1C	chr12	2692175	2692176	3'UTR	A	G	38.4544	38.0432	0.959906	no	82.2259	81.5141	0.971154	no	0.43871	0.445161	0.0814815	0.0814815
chr12_2692767_2692768_+_G_A	NM_000719.6(CACNA1C):c.*1569G>A	CACNA1C	chr12	2692767	2692768	3'UTR	G	A					61.6357	82.7484	0.230961	no	0.329032	0.322581	0.0888889	0.0888889
chr12_2693123_2693124_+_C_T	NM_000719.6(CACNA1C):c.*1925C>T	CACNA1C	chr12	2693123	2693124	3'UTR	C	T	12.5728	194.432	0.127654	no	69.4315	77.2309	0.308636	no	0.425806	0.419355	0.0666667	0.0666667
chr12_2694015_2694016_+_G_A	NM_000719.6(CACNA1C):c.*2817G>A	CACNA1C	chr12	2694015	2694016	3'UTR	G	A					66.6195	153.579	0.0103285	no	0.445161	0.43871	0.0592593	0.0592593
chr12_2694229_2694230_+_T_A	NM_000719.6(CACNA1C):c.*3031T>A	CACNA1C	chr12	2694229	2694230	3'UTR	T	A					65.5872	79.3026	0.520906	no	0.470968	0.470968	0.0592593	0.0518519
chr12_2695638_2695639_+_C_G	NM_000719.6(CACNA1C):c.*4440C>G	CACNA1C	chr12	2695638	2695639	3'UTR	C	G	10.9004	17.2174	0.475894	no	71.6328	110.15	0.131825	no	0.567742	0.567742	0.037037	0.037037
chr1_226987085_226987086_+_G_A	NM_020247.4(COQ8A):c.*349G>A	COQ8A	chr1	226987085	226987086	3'UTR	G	A	68.9287	53.611	0.84612	no	59.7578	83.0278	0.111293	no	0.451613	0.445161	0.0592593	0.0666667
chr1_231277664_231277665_+_A_G	NM_014236.3(GNPAT):c.*123A>G	GNPAT	chr1	231277664	231277665	3'UTR	A	G	184.203	1463.88	0.541111	no	75.6881	120.995	0.0095187	no	0.490323	0.496774	0.037037	0.037037
chr12_32641600_32641601_+_A_G	NM_139241.3(FGD4):c.*1068A>G	FGD4	chr12	32641600	32641601	3'UTR	A	G	39.3661	8.53554	0.00463668	yes	76.0822	71.9213	0.822033	no	0.4	0.406452	0.0888889	0.0888889
chr12_32645304_32645305_+_T_TT	NM_139241.3(FGD4):c.*4772dupT	FGD4	chr12	32645304	32645305	3'UTR	T	TT	34.7547	26.9793	0.380552	no	61.2103	75.6344	0.288475	no	0.36129	0.358974	0.0814815	0.0808824
chr1_236482748_236482749_+_C_T	NM_145861.2(EDARADD):c.*100C>T	EDARADD	chr1	236482748	236482749	3'UTR	C	T	30.4929	34.1602	0.773328	no	76.719	61.31	0.364447	no	0.477419	0.470968	0.0444444	0.0444444
chr1_236482933_236482934_+_G_A	NM_145861.2(EDARADD):c.*285G>A	EDARADD	chr1	236482933	236482934	3'UTR	G	A	15.6161	12.5318	0.429452	no	79.8916	83.7287	0.807124	no	0.406452	0.4	0.0962963	0.103704
chr1_236483615_236483616_+_A_G	NM_145861.2(EDARADD):c.*967A>G	EDARADD	chr1	236483615	236483616	3'UTR	A	G	30.5006	17.2336	0.528679	no	69.3245	63.8832	0.680492	no	0.529032	0.535484	0.0148148	0.0148148
chr1_236763715_236763716_+_G_A	NM_001103.3(ACTN2):c.*1097G>A	ACTN2	chr1	236763715	236763716	3'UTR	G	A	18.7783	22.8448	0.54063	no	67.37	79.8842	0.452654	no	0.458065	0.451613	0.0962963	0.0962963
chr1_236763871_236763872_+_G_T	NM_001103.3(ACTN2):c.*1253G>T	ACTN2	chr1	236763871	236763872	3'UTR	G	T	39.8379	336.489	0.00968059	yes	84.0286	80.1704	0.794922	no	0.432258	0.425806	0.0666667	0.0666667
chr1_236763892_236763894_+_CT_-	NM_001103.3(ACTN2):c.*1274_*1275delCT	ACTN2	chr1	236763892	236763894	3'UTR	CT	-					90.3326	79.4582	0.537837	no	0.403846	0.402597	0.0735294	0.0746269
chr1_236898463_236898464_+_A_G	NM_000254.2(MTR):c.*820A>G	MTR	chr1	236898463	236898464	3'UTR	A	G	62.7268	16.4703	0.0890351	no	87.4523	68.3712	0.120161	no	0.56129	0.567742	0.0222222	0.0222222
chr1_236898665_236898666_+_G_T	NM_000254.2(MTR):c.*1022G>T	MTR	chr1	236898665	236898666	3'UTR	G	T					54.4535	85.9409	0.0972724	no	0.56129	0.554839	0.037037	0.037037
chr1_236899507_236899508_+_T_C	NM_000254.2(MTR):c.*1864T>C	MTR	chr1	236899507	236899508	3'UTR	T	C	61.2566	82.0657	0.606094	no	75.3922	75.4084	0.999166	no	0.374194	0.380645	0.0740741	0.0740741
chr1_236899555_236899556_+_G_T	NM_000254.2(MTR):c.*1912G>T	MTR	chr1	236899555	236899556	3'UTR	G	T					67.1691	68.1934	0.953731	no	0.4	0.393548	0.0740741	0.0740741
chr1_236899919_236899920_+_G_A	NM_000254.2(MTR):c.*2276G>A	MTR	chr1	236899919	236899920	3'UTR	G	A					235.363	71.5964	0.00506	no	0.419355	0.412903	0.0814815	0.0814815
chr1_236900416_236900418_+_AA_AAAA	NM_000254.2(MTR):c.*2773_*2774dupAA	MTR	chr1	236900416	236900418	3'UTR	AA	AAAA	10.9071	23.3654	0.14623	no	65.9188	101.546	0.219087	no	0.371795	0.367089	0.125	0.123188
chr1_236901553_236901554_+_G_A	NM_000254.2(MTR):c.*3910G>A	MTR	chr1	236901553	236901554	3'UTR	G	A					94.0134	94.0706	0.998391	no	0.470968	0.464516	0.0814815	0.0888889
chr1_236901990_236901991_+_A_T	NM_000254.2(MTR):c.*4347A>T	MTR	chr1	236901990	236901991	3'UTR	A	T	130.219	26.7598	0.00948507	yes	79.4374	73.1048	0.797913	no	0.522581	0.522581	0.0592593	0.0592593
chr1_236902466_236902467_+_G_A	NM_000254.2(MTR):c.*4823G>A	MTR	chr1	236902466	236902467	3'UTR	G	A					82.1331	90.2851	0.606142	no	0.432258	0.425806	0.0962963	0.0962963
chr1_236902898_236902899_+_T_C	NM_000254.2(MTR):c.*5255T>C	MTR	chr1	236902898	236902899	3'UTR	T	C	23.2919	14.6173	0.153106	no	81.7416	84.1127	0.893834	no	0.380645	0.387097	0.103704	0.103704
chr1_236903620_236903621_+_A_T	NM_000254.2(MTR):c.*5977A>T	MTR	chr1	236903620	236903621	3'UTR	A	T	23.8453	41.0639	0.149797	no	81.3695	81.3827	0.99945	no	0.412903	0.412903	0.0592593	0.0592593
chr1_237832725_237832726_+_C_A	NM_001035.2(RYR2):c.*79C>A	RYR2	chr1	237832725	237832726	3'UTR	C	A	95.5943	77.9935	0.877098	no	87.566	67.7257	0.259365	no	0.477419	0.470968	0.0222222	0.0222222
chr1_237833754_237833755_+_A_G	NM_001035.2(RYR2):c.*1108A>G	RYR2	chr1	237833754	237833755	3'UTR	A	G					43.2287	73.7462	0.0197947	no	0.4	0.406452	0.0666667	0.0666667
chr12_40368735_40368736_+_C_A	NM_198578.3(LRRK2):c.*971C>A	LRRK2	chr12	40368735	40368736	3'UTR	C	A	38.7396	72.55	0.423331	no	52.8817	60.4357	0.488324	no	0.393548	0.387097	0.0814815	0.0814815
chr12_42459666_42459667_+_C_T	NM_153026.2(PRICKLE1):c.*142G>A	PRICKLE1	chr12	42459666	42459667	3'UTR	C	T					71.2295	72.2994	0.954299	no	0.412903	0.406452	0.0592593	0.0592593
chr12_42459738_42459739_+_C_T	NM_153026.2(PRICKLE1):c.*70G>A	PRICKLE1	chr12	42459738	42459739	3'UTR	C	T					124.874	66.9525	0.0375805	no	0.412903	0.406452	0.0666667	0.0666667
chr12_48145710_48145711_+_C_T	NM_000289.5(PFKM):c.*3C>T	PFKM	chr12	48145710	48145711	3'UTR	C	T	28.1102	28.9043	0.961347	no	89.8924	62.4767	0.211645	no	0.43871	0.432258	0.0666667	0.0666667
chr12_4913457_4913458_+_C_A	NM_000217.2(KCNA1):c.*592C>A	KCNA1	chr12	4913457	4913458	3'UTR	C	A	8.21804	12.3807	0.235276	no	72.0041	85.8052	0.488649	no	0.458065	0.451613	0.0740741	0.0740741
chr12_4915623_4915624_+_G_A	NM_000217.2(KCNA1):c.*2758G>A	KCNA1	chr12	4915623	4915624	3'UTR	G	A					92.843	86.1909	0.750884	no	0.464516	0.458065	0.0518519	0.0518519
chr12_4916065_4916066_+_A_G	NM_000217.2(KCNA1):c.*3200A>G	KCNA1	chr12	4916065	4916066	3'UTR	A	G					52.6105	60.65	0.503728	no	0.445161	0.451613	0.0740741	0.0740741
chr12_4917583_4917584_+_C_T	NM_000217.2(KCNA1):c.*4718C>T	KCNA1	chr12	4917583	4917584	3'UTR	C	T	24.8625	44.9334	0.520385	no	80.6839	82.3675	0.922211	no	0.509677	0.503226	0.0518519	0.0518519
chr12_4918004_4918005_+_A_AA	NM_000217.2(KCNA1):c.*5139dupA	KCNA1	chr12	4918004	4918005	3'UTR	A	AA					69.6111	88.1098	0.145955	no	0.412903	0.410256	0.0740741	0.0735294
chr12_49957206_49957207_+_A_G	NM_000486.5(AQP2):c.*1599A>G	AQP2	chr12	49957206	49957207	3'UTR	A	G	47.8428	274.399	0.636921	no	70.9629	90.8212	0.402301	no	0.567742	0.574194	0.0296296	0.0296296
chr12_51807434_51807435_+_A_T	NM_014191.3(SCN8A):c.*6A>T	SCN8A	chr12	51807434	51807435	3'UTR	A	T					89.2711	72.3696	0.284259	no	0.4	0.4	0.0740741	0.0814815
chr12_51807987_51807988_+_T_C	NM_014191.3(SCN8A):c.*559T>C	SCN8A	chr12	51807987	51807988	3'UTR	T	C					79.1717	75.5292	0.85277	no	0.509677	0.516129	0.0222222	0.0222222
chr12_51809829_51809830_+_T_G	NM_014191.3(SCN8A):c.*2401T>G	SCN8A	chr12	51809829	51809830	3'UTR	T	G	19.4247	18.1472	0.920458	no	104.802	90.8598	0.587563	no	0.4	0.406452	0.0740741	0.0740741
chr12_51921092_51921093_+_A_G	NM_000020.2(ACVRL1):c.*200A>G	ACVRL1	chr12	51921092	51921093	3'UTR	A	G					90.5684	94.2109	0.872573	no	0.606452	0.612903	0.0296296	0.0296296
chr12_57584497_57584498_+_C_T	NM_004984.3(KIF5A):c.*317C>T	KIF5A	chr12	57584497	57584498	3'UTR	C	T					82.1824	38.9196	0.000117256	yes	0.477419	0.470968	0.0666667	0.0740741
chr12_57748221_57748222_+_A_-	NM_000075.3(CDK4):c.*303delT	CDK4	chr12	57748221	57748222	3'UTR	A	-					82.578	65.2891	0.342311	no	0.406452	0.409091	0.0444444	0.0447761
chr12_57796792_57796793_+_G_A	NM_001172696.1(TSFM):c.*210G>A	TSFM	chr12	57796792	57796793	3'UTR	G	A					109.067	84.4649	0.592038	no	0.451613	0.445161	0.0666667	0.0666667
chr12_57797540_57797541_+_C_G	NM_001172696.1(TSFM):c.*958C>G	TSFM	chr12	57797540	57797541	3'UTR	C	G					70.8822	84.9065	0.531652	no	0.309677	0.309677	0.125926	0.125926
chr1_25817924_25817925_+_G_A	NM_020451.2(SELENON):c.*2207G>A	SELENON	chr1	25817924	25817925	3'UTR	G	A					87.3996	79.8426	0.723084	no	0.632258	0.625806	0.0222222	0.0222222
chr1_25817945_25817946_+_T_-	NM_020451.2(SELENON):c.*2228delT	SELENON	chr1	25817945	25817946	3'UTR	T	-					68.8775	72.9911	0.801312	no	0.63871	0.642857	0.0222222	0.0223881
chr1_26470561_26470562_+_C_T	NM_024887.3(DHDDS):c.*1431C>T	DHDDS	chr1	26470561	26470562	3'UTR	C	T	32.8451	10.6652	0.124992	no	86.7923	56.2622	0.0840639	no	0.529032	0.522581	0.0592593	0.0592593
chr1_26471234_26471235_+_A_T	NM_024887.3(DHDDS):c.*2104A>T	DHDDS	chr1	26471234	26471235	3'UTR	A	T					63.252	69.4068	0.760065	no	0.458065	0.458065	0.0518519	0.0518519
chr12_6870621_6870622_+_C_T	NM_000365.5(TPI1):c.*239C>T	TPI1	chr12	6870621	6870622	3'UTR	C	T	29.0643	59.9936	0.00767107	yes	55.45	59.1984	0.711497	no	0.522581	0.516129	0.0592593	0.0592593
chr12_6870923_6870924_+_A_AA	NM_000365.5(TPI1):c.*541dupA	TPI1	chr12	6870923	6870924	3'UTR	A	AA	20.2202	14.142	0.517995	no					0.4	0.397436	0.0592593	0.0588235
chr12_72032118_72032119_+_C_T	NM_173353.3(TPH2):c.*424C>T	TPH2	chr12	72032118	72032119	3'UTR	C	T	16.3302	44.8758	0.0499887	yes	79.1495	90.8755	0.495015	no	0.380645	0.374194	0.0666667	0.0666667
chr12_7210354_7210355_+_C_G	NM_001131025.1(PEX5):c.*132C>G	PEX5	chr12	7210354	7210355	3'UTR	C	G	34.5285	37.5583	0.816484	no	61.7561	80.197	0.253059	no	0.541935	0.541935	0.0814815	0.0814815
chr12_7211213_7211215_+_CC_CCCC	NM_001131025.1(PEX5):c.*991_*992dupCC	PEX5	chr12	7211213	7211215	3'UTR	CC	CCCC					55.6055	96.3322	0.0114273	no	0.5	0.506329	0.0367647	0.0362319
chr12_909169_909170_+_A_G	NM_018979.3(WNK1):c.*378A>G	WNK1	chr12	909169	909170	3'UTR	A	G	21.4194	536.057	0.0887432	no	193.596	73.9201	0.0242247	no	0.477419	0.483871	0.0444444	0.0444444
chr12_909557_909558_+_G_A	NM_018979.3(WNK1):c.*766G>A	WNK1	chr12	909557	909558	3'UTR	G	A	27.5849	12.3487	0.00892552	yes	84.2446	79.8423	0.801232	no	0.341935	0.335484	0.111111	0.118519
chr12_910095_910096_+_C_T	NM_018979.3(WNK1):c.*1304C>T	WNK1	chr12	910095	910096	3'UTR	C	T					55.5762	79.7457	0.315247	no	0.470968	0.464516	0.0666667	0.0666667
chr12_910781_910782_+_G_A	NM_018979.3(WNK1):c.*1990G>A	WNK1	chr12	910781	910782	3'UTR	G	A	25.951	12.0942	0.189535	no	96.5887	84.2872	0.594619	no	0.483871	0.477419	0.0888889	0.0888889
chr12_911169_911173_+_GTTT_GTTTGTTT	NM_018979.3(WNK1):c.*2378_*2381dupGTTT	WNK1	chr12	911169	911173	3'UTR	GTTT	GTTTGTTT					55.1637	68.0247	0.264978	no	0.367089	0.364198	0.101449	0.0985915
chr12_98534622_98534623_+_C_T	NM_003276.2(TMPO):c.*281C>T	TMPO	chr12	98534622	98534623	3'UTR	C	T					69.8416	91.4171	0.262825	no	0.341935	0.335484	0.118519	0.125926
chr13_100530324_100530325_+_T_G	NM_000282.3(PCCA):c.*159T>G	PCCA	chr13	100530324	100530325	3'UTR	T	G					87.5532	91.6313	0.834983	no	0.387097	0.393548	0.0888889	0.0888889
chr13_110513020_110513021_+_T_C	NM_001846.3(COL4A2):c.*830T>C	COL4A2	chr13	110513020	110513021	3'UTR	T	C	20.8173	17.0404	0.622245	no	81.7814	65.1944	0.217616	no	0.483871	0.490323	0.0666667	0.0666667
chr13_113119612_113119613_+_G_A	NM_000131.4(F7):c.*605G>A	F7	chr13	113119612	113119613	3'UTR	G	A					41.6389	72.0906	0.167643	no	0.509677	0.503226	0.0518519	0.0518519
chr13_21701700_21701701_+_G_A	NM_002010.2(FGF9):c.*266G>A	FGF9	chr13	21701700	21701701	3'UTR	G	A	36.8637	29.287	0.640114	no	56.4257	61.3347	0.660836	no	0.496774	0.490323	0.0518519	0.0518519
chr13_21702147_21702148_+_T_C	NM_002010.2(FGF9):c.*713T>C	FGF9	chr13	21702147	21702148	3'UTR	T	C	44.607	38.8258	0.816791	no	67.9966	78.7746	0.532481	no	0.419355	0.425806	0.0888889	0.0888889
chr13_21703797_21703798_+_A_G	NM_002010.2(FGF9):c.*2363A>G	FGF9	chr13	21703797	21703798	3'UTR	A	G	44.0388	62.1029	0.587787	no					0.387097	0.393548	0.0888889	0.0888889
chr13_32399129_32399130_+_C_CC	NM_000059.3(BRCA2):c.*360dupC	BRCA2	chr13	32399129	32399130	3'UTR	C	CC					70.5402	98.9253	0.334911	no	0.458065	0.461538	0.037037	0.0367647
chr13_36827833_36827834_+_G_A	NM_000538.3(RFXAP):c.*81G>A	RFXAP	chr13	36827833	36827834	3'UTR	G	A	20.3234	15.7857	0.569641	no	87.6114	69.4572	0.285873	no	0.354839	0.348387	0.118519	0.118519
chr13_38883880_38883881_+_T_C	NM_207361.5(FREM2):c.*3094T>C	FREM2	chr13	38883880	38883881	3'UTR	T	C	25.5927	9.17325	0.0480194	yes	70.8305	73.699	0.882112	no	0.419355	0.425806	0.0740741	0.0666667
chr13_38886350_38886352_+_CA_-	NM_207361.5(FREM2):c.*5564_*5565delCA	FREM2	chr13	38886350	38886352	3'UTR	CA	-					85.7319	75.9277	0.628877	no	0.358974	0.357143	0.132353	0.134328
chr13_38886969_38886970_+_C_T	NM_207361.5(FREM2):c.*6183C>T	FREM2	chr13	38886969	38886970	3'UTR	C	T	27.7706	14.3437	0.103838	no	84.6787	77.3196	0.708965	no	0.380645	0.374194	0.103704	0.103704
chr13_39751239_39751240_+_T_TT	NM_020751.2(COG6):c.*147dupT	COG6	chr13	39751239	39751240	3'UTR	T	TT	33.3815	20.8153	0.127101	no	61.2548	69.8753	0.527946	no	0.380645	0.378205	0.103704	0.102941
chr13_39751681_39751682_+_C_G	NM_020751.2(COG6):c.*589C>G	COG6	chr13	39751681	39751682	3'UTR	C	G					68.9112	82.1325	0.359101	no	0.387097	0.387097	0.125926	0.125926
chr13_42607471_42607472_+_A_G	NM_003701.3(TNFSF11):c.*554A>G	TNFSF11	chr13	42607471	42607472	3'UTR	A	G					78.0167	81.8189	0.869059	no	0.296774	0.303226	0.125926	0.118519
chr1_34785880_34785881_+_C_T	NM_024009.2(GJB3):c.*306C>T	GJB3	chr1	34785880	34785881	3'UTR	C	T	15.3924	21.6214	0.466555	no	68.6457	83.4318	0.317794	no	0.554839	0.548387	0.0444444	0.0444444
chr1_34786106_34786107_+_G_-	NM_024009.2(GJB3):c.*532delG	GJB3	chr1	34786106	34786107	3'UTR	G	-					145.078	84.9797	0.0770853	no	0.587097	0.584416	0.0296296	0.0298507
chr13_48480483_48480484_+_T_G	NM_000321.2(RB1):c.*413T>G	RB1	chr13	48480483	48480484	3'UTR	T	G					86.1505	75.9292	0.579847	no	0.335484	0.341935	0.111111	0.111111
chr13_48480674_48480675_+_A_T	NM_000321.2(RB1):c.*604A>T	RB1	chr13	48480674	48480675	3'UTR	A	T					65.8578	67.7441	0.920383	no	0.316129	0.316129	0.133333	0.125926
chr13_48481068_48481069_+_G_A	NM_000321.2(RB1):c.*998G>A	RB1	chr13	48481068	48481069	3'UTR	G	A	24.8847	63.9437	0.00262687	yes	92.0093	96.0413	0.835912	no	0.374194	0.367742	0.0740741	0.0814815
chr13_48481705_48481706_+_T_A	NM_000321.2(RB1):c.*1635T>A	RB1	chr13	48481705	48481706	3'UTR	T	A	17.0309	14.9601	0.832106	no	63.2306	55.1012	0.468763	no	0.393548	0.393548	0.0962963	0.0962963
chr13_77001689_77001690_+_G_A	NM_006493.2(CLN5):c.*721G>A	CLN5	chr13	77001689	77001690	3'UTR	G	A					59.2338	79.9532	0.169491	no	0.406452	0.4	0.0740741	0.0814815
chr13_94403342_94403343_+_G_C	NM_005708.4(GPC6):c.*126G>C	GPC6	chr13	94403342	94403343	3'UTR	G	C	108.464	13294.8	0.522296	no	75.4637	118.238	0.0413536	no	0.477419	0.477419	0.0444444	0.0444444
chr13_94404404_94404405_+_T_C	NM_005708.4(GPC6):c.*1188T>C	GPC6	chr13	94404404	94404405	3'UTR	T	C					86.5372	78.6403	0.667872	no	0.335484	0.341935	0.118519	0.118519
chr13_94405016_94405017_+_T_G	NM_005708.4(GPC6):c.*1800T>G	GPC6	chr13	94405016	94405017	3'UTR	T	G					115.607	57.1482	0.0204702	no	0.354839	0.36129	0.0962963	0.0962963
chr13_94405515_94405516_+_A_G	NM_005708.4(GPC6):c.*2299A>G	GPC6	chr13	94405515	94405516	3'UTR	A	G	30.3672	25.7453	0.579785	no	83.2323	82.7948	0.979421	no	0.374194	0.380645	0.0814815	0.0814815
chr13_94407085_94407086_+_A_G	NM_005708.4(GPC6):c.*3869A>G	GPC6	chr13	94407085	94407086	3'UTR	A	G					81.9828	73.8074	0.604024	no	0.419355	0.425806	0.0814815	0.0740741
chr1_40292964_40292965_+_T_C	NM_005857.4(ZMPSTE24):c.*296T>C	ZMPSTE24	chr1	40292964	40292965	3'UTR	T	C					56.1024	84.203	0.168567	no	0.393548	0.4	0.0888889	0.0814815
chr1_40293370_40293371_+_C_T	NM_005857.4(ZMPSTE24):c.*702C>T	ZMPSTE24	chr1	40293370	40293371	3'UTR	C	T	46.44	43.8214	0.807724	no	84.5498	78.7716	0.739688	no	0.387097	0.380645	0.0518519	0.0518519
chr1_40293808_40293809_+_T_C	NM_005857.4(ZMPSTE24):c.*1140T>C	ZMPSTE24	chr1	40293808	40293809	3'UTR	T	C	12.9755	33.8359	0.104376	no	85.0731	87.6133	0.888487	no	0.4	0.406452	0.0592593	0.0592593
chr14_31859536_31859537_+_C_G	NM_025152.2(NUBPL):c.*357C>G	NUBPL	chr14	31859536	31859537	3'UTR	C	G					72.0294	107.438	0.193289	no	0.425806	0.425806	0.0962963	0.0962963
chr14_31860301_31860304_+_CAA_-	NM_025152.2(NUBPL):c.*1122_*1124delCAA	NUBPL	chr14	31860301	31860304	3'UTR	CAA	-					55.6634	58.6537	0.835651	no	0.43949	0.441558	0.0364964	0.0447761
chr1_43353642_43353643_+_G_A	NM_005373.2(MPL):c.*871G>A	MPL	chr1	43353642	43353643	3'UTR	G	A	38.0289	94.9669	0.289767	no	70.9585	87.6141	0.333067	no	0.522581	0.516129	0.0518519	0.0518519
chr14_49623277_49623281_+_TTTT_-	NM_002408.3(MGAT2):c.*666_*669delTTTT	MGAT2	chr14	49623277	49623281	3'UTR	TTTT	-	78.603	26.7218	0.107357	no	60.3888	69.7411	0.403642	no	0.335443	0.344156	0.0724638	0.0746269
chr14_50632866_50632867_+_A_C	NM_015915.4(ATL1):c.*528A>C	ATL1	chr14	50632866	50632867	3'UTR	A	C	13.8107	8.73214	0.0881703	no	79.3682	98.0764	0.409098	no	0.335484	0.341935	0.111111	0.111111
chr1_45509296_45509297_+_A_G	NM_015506.2(MMACHC):c.*82A>G	MMACHC	chr1	45509296	45509297	3'UTR	A	G					85.3153	94.5639	0.768608	no	0.4	0.406452	0.103704	0.103704
chr14_64226014_64226015_+_C_A	NM_182914.2(SYNE2):c.*489C>A	SYNE2	chr14	64226014	64226015	3'UTR	C	A	33.6375	13.2276	0.0826686	no	83.014	69.3154	0.272707	no	0.425806	0.419355	0.0814815	0.0814815
chr14_73221159_73221163_+_ACAG_-	NM_000021.3(PSEN1):c.*1871_*1874delACAG	PSEN1	chr14	73221159	73221163	3'UTR	ACAG	-					90.5922	85.5115	0.753734	no	0.405063	0.402597	0.101449	0.104478
chr14_73221246_73221247_+_T_C	NM_000021.3(PSEN1):c.*1958T>C	PSEN1	chr14	73221246	73221247	3'UTR	T	C	206.06	25.7078	0.100792	no	77.941	73.0489	0.726686	no	0.419355	0.425806	0.0666667	0.0666667
chr14_73696441_73696442_+_G_A	NM_031427.3(DNAL1):c.*500G>A	DNAL1	chr14	73696441	73696442	3'UTR	G	A	37.3886	22.1184	0.625002	no					0.458065	0.451613	0.0518519	0.0518519
chr14_73697764_73697765_+_A_-	NM_031427.3(DNAL1):c.*1823delA	DNAL1	chr14	73697764	73697765	3'UTR	A	-	40.2976	30.5423	0.635701	no	65.5385	53.8945	0.276224	no	0.387097	0.38961	0.0518519	0.0522388
chr14_73697909_73697910_+_C_T	NM_031427.3(DNAL1):c.*1968C>T	DNAL1	chr14	73697909	73697910	3'UTR	C	T					73.3904	43.5082	0.030912	no	0.412903	0.406452	0.0592593	0.0666667
chr14_73697943_73697944_+_T_C	NM_031427.3(DNAL1):c.*2002T>C	DNAL1	chr14	73697943	73697944	3'UTR	T	C					63.8319	79.0678	0.370974	no	0.445161	0.451613	0.0518519	0.0518519
chr14_73698677_73698678_+_A_G	NM_031427.3(DNAL1):c.*2736A>G	DNAL1	chr14	73698677	73698678	3'UTR	A	G	36.135	36.0134	0.997985	no	67.8745	80.248	0.350441	no	0.529032	0.535484	0.0444444	0.0444444
chr14_73700167_73700168_+_G_A	NM_031427.3(DNAL1):c.*4226G>A	DNAL1	chr14	73700167	73700168	3'UTR	G	A	11.6536	8.99853	0.507015	no	67.5603	78.4444	0.693036	no	0.56129	0.554839	0.0444444	0.0444444
chr14_73702079_73702080_+_T_G	NM_031427.3(DNAL1):c.*6138T>G	DNAL1	chr14	73702079	73702080	3'UTR	T	G	62.6104	74.5549	0.798566	no	67.718	71.3838	0.795534	no	0.470968	0.477419	0.037037	0.037037
chr14_73702085_73702086_+_T_G	NM_031427.3(DNAL1):c.*6144T>G	DNAL1	chr14	73702085	73702086	3'UTR	T	G	82.8046	43.4719	0.212649	no	65.9526	69.7304	0.773799	no	0.470968	0.477419	0.0296296	0.0296296
chr14_73702103_73702104_+_T_C	NM_031427.3(DNAL1):c.*6162T>C	DNAL1	chr14	73702103	73702104	3'UTR	T	C	27.7348	30.5499	0.689962	no	70.4511	51.6079	0.14669	no	0.451613	0.458065	0.0296296	0.0296296
chr14_73702157_73702158_+_T_TT	NM_031427.3(DNAL1):c.*6216dupT	DNAL1	chr14	73702157	73702158	3'UTR	T	TT	121.966	127.188	0.977039	no	78.5711	66.1467	0.398551	no	0.496774	0.49359	0.0222222	0.0220588
chr14_73703519_73703520_+_C_T	NM_031427.3(DNAL1):c.*7578C>T	DNAL1	chr14	73703519	73703520	3'UTR	C	T	11.7378	72.1591	5.15939e-07	yes	72.2065	84.2386	0.526977	no	0.464516	0.458065	0.0592593	0.0592593
chr14_74261773_74261774_+_G_A	NM_182894.2(VSX2):c.*855G>A	VSX2	chr14	74261773	74261774	3'UTR	G	A					118.639	76.2694	0.33783	no	0.548387	0.541935	0.0296296	0.0296296
chr14_75647882_75647884_+_AT_-	NM_017791.2(FLVCR2):c.*1411_*1412delAT	FLVCR2	chr14	75647882	75647884	3'UTR	AT	-	67.6646	35.3754	0.584832	no	56.627	64.9934	0.513159	no	0.50641	0.512987	0.0367647	0.0373134
chr14_81145669_81145670_+_C_A	NM_000369.2(TSHR):c.*1317C>A	TSHR	chr14	81145669	81145670	3'UTR	C	A	63.6912	57.0714	0.86851	no	83.2194	70.6937	0.55652	no	0.464516	0.458065	0.0444444	0.0444444
chr14_81146298_81146299_+_C_T	NM_000369.2(TSHR):c.*1946C>T	TSHR	chr14	81146298	81146299	3'UTR	C	T	38.5252	19.9219	0.0691117	no	81.5213	61.7552	0.109279	no	0.380645	0.374194	0.0740741	0.0740741
chr15_22824295_22824296_+_G_A	NM_144599.4(NIPA1):c.*57G>A	NIPA1	chr15	22824295	22824296	3'UTR	G	A					94.3914	82.6526	0.576081	no	0.483871	0.477419	0.0518519	0.0518519
chr15_22825018_22825019_+_G_A	NM_144599.4(NIPA1):c.*780G>A	NIPA1	chr15	22825018	22825019	3'UTR	G	A					65.3492	66.9735	0.921578	no	0.354839	0.348387	0.111111	0.111111
chr15_22827246_22827247_+_C_T	NM_144599.4(NIPA1):c.*3008C>T	NIPA1	chr15	22827246	22827247	3'UTR	C	T	29.0481	18.0492	0.0584776	no	85.922	87.9399	0.900751	no	0.419355	0.412903	0.0666667	0.0666667
chr15_22828061_22828062_+_G_A	NM_144599.4(NIPA1):c.*3823G>A	NIPA1	chr15	22828061	22828062	3'UTR	G	A	45.3988	11.1939	7.96891e-09	yes	87.5428	64.503	0.189353	no	0.477419	0.470968	0.0444444	0.0518519
chr15_22828394_22828395_+_A_G	NM_144599.4(NIPA1):c.*4156A>G	NIPA1	chr15	22828394	22828395	3'UTR	A	G					86.7495	75.3255	0.494315	no	0.387097	0.393548	0.0888889	0.0888889
chr15_40418552_40418553_+_T_TT	NM_002225.3(IVD):c.*290dupT	IVD	chr15	40418552	40418553	3'UTR	T	TT	19.6982	25.8276	0.595502	no	66.6491	76.4454	0.580415	no	0.574194	0.570513	0.037037	0.0367647
chr15_40419071_40419072_+_G_A	NM_002225.3(IVD):c.*809G>A	IVD	chr15	40419071	40419072	3'UTR	G	A	32.9973	292.589	0.16542	no	133.308	89.9594	0.157467	no	0.56129	0.554839	0.0296296	0.0296296
chr15_40420756_40420757_+_C_G	NM_002225.3(IVD):c.*2494C>G	IVD	chr15	40420756	40420757	3'UTR	C	G	23.8097	29.4874	0.75485	no	88.393	91.0247	0.838517	no	0.43871	0.43871	0.0296296	0.0296296
chr15_40420821_40420822_+_G_A	NM_002225.3(IVD):c.*2559G>A	IVD	chr15	40420821	40420822	3'UTR	G	A	97.5338	28.7626	0.140559	no	82.8029	85.9943	0.862596	no	0.509677	0.503226	0.0296296	0.0296296
chr15_42724141_42724142_+_T_C	NM_138477.3(CDAN1):c.*349A>G	CDAN1	chr15	42724141	42724142	3'UTR	T	C					56.3095	122.974	0.0132752	no	0.451613	0.458065	0.0444444	0.037037
chr15_48303037_48303038_+_T_C	NM_000338.2(SLC12A1):c.*153T>C	SLC12A1	chr15	48303037	48303038	3'UTR	T	C	30.0979	16.0538	0.142883	no	83.417	56.7064	0.174466	no	0.425806	0.432258	0.0740741	0.0666667
chr15_48811082_48811083_+_G_A	NM_014985.3(CEP152):c.-130C>T	CEP152	chr15	48811082	48811083	3'UTR	G	A					60.5965	66.7535	0.585962	no	0.580645	0.574194	0.0592593	0.0592593
chr1_55063815_55063816_+_C_T	NM_174936.3(PCSK9):c.*232C>T	PCSK9	chr1	55063815	55063816	3'UTR	C	T	23.5844	40.3203	0.352	no	102.354	90.6551	0.631322	no	0.6	0.593548	0.0148148	0.0148148
chr1_55063857_55063858_+_C_A	NM_174936.3(PCSK9):c.*274C>A	PCSK9	chr1	55063857	55063858	3'UTR	C	A					85.522	77.3194	0.696129	no	0.56129	0.554839	0.0222222	0.0222222
chr15_63065974_63065975_+_A_G	NM_001018005.1(TPM1):c.*76A>G	TPM1	chr15	63065974	63065975	3'UTR	A	G					63.9897	59.8783	0.787062	no	0.548387	0.554839	0.037037	0.0296296
chr15_65079303_65079304_+_C_T	NM_001101362.2(KBTBD13):c.*1112C>T	KBTBD13	chr15	65079303	65079304	3'UTR	C	T	55.2883	58.9708	0.937019	no	110.683	93.2484	0.474442	no	0.535484	0.529032	0.037037	0.037037
chr15_65079467_65079468_+_G_T	NM_001101362.2(KBTBD13):c.*1276G>T	KBTBD13	chr15	65079467	65079468	3'UTR	G	T	16.6992	15.5288	0.891527	no	151.078	95.0558	0.0814725	no	0.509677	0.503226	0.0444444	0.0518519
chr15_65654118_65654119_+_C_A	NM_004727.2(SLC24A1):c.*40C>A	SLC24A1	chr15	65654118	65654119	3'UTR	C	A	204.769	41.8961	0.367304	no	66.1847	103.606	0.0803109	no	0.464516	0.458065	0.0518519	0.0518519
chr15_65654427_65654428_+_C_T	NM_004727.2(SLC24A1):c.*349C>T	SLC24A1	chr15	65654427	65654428	3'UTR	C	T	60.4398	44.0135	0.787164	no	84.3442	99.4069	0.502402	no	0.529032	0.522581	0.0518519	0.0518519
chr15_65655300_65655301_+_G_C	NM_004727.2(SLC24A1):c.*1222G>C	SLC24A1	chr15	65655300	65655301	3'UTR	G	C	53.6794	17.1799	0.11278	no	76.86	73.9396	0.859721	no	0.4	0.4	0.103704	0.103704
chr15_65655552_65655553_+_A_G	NM_004727.2(SLC24A1):c.*1474A>G	SLC24A1	chr15	65655552	65655553	3'UTR	A	G	15.7489	37.9548	0.204132	no	76.1841	71.9704	0.768421	no	0.419355	0.425806	0.0962963	0.0962963
chr15_65655686_65655687_+_C_T	NM_004727.2(SLC24A1):c.*1608C>T	SLC24A1	chr15	65655686	65655687	3'UTR	C	T					78.3121	91.5729	0.500899	no	0.393548	0.387097	0.0592593	0.0592593
chr15_65656105_65656106_+_G_A	NM_004727.2(SLC24A1):c.*2027G>A	SLC24A1	chr15	65656105	65656106	3'UTR	G	A	96.2336	56.2135	0.500667	no	87.9229	80.6419	0.717184	no	0.574194	0.567742	0.037037	0.037037
chr15_66491229_66491230_+_G_T	NM_002755.3(MAP2K1):c.*615G>T	MAP2K1	chr15	66491229	66491230	3'UTR	G	T					84.4723	53.601	0.0716256	no	0.470968	0.464516	0.0888889	0.0888889
chr15_67191191_67191192_+_C_A	NM_005902.3(SMAD3):c.*656C>A	SMAD3	chr15	67191191	67191192	3'UTR	C	A	552.951	16.1635	0.00984655	yes	88.9441	85.8036	0.87385	no	0.490323	0.483871	0.037037	0.037037
chr15_67192176_67192177_+_T_G	NM_005902.3(SMAD3):c.*1641T>G	SMAD3	chr15	67192176	67192177	3'UTR	T	G	51.8524	29.0721	0.0157697	no	86.1237	76.0213	0.584127	no	0.470968	0.477419	0.0518519	0.0518519
chr15_67192179_67192180_+_T_G	NM_005902.3(SMAD3):c.*1644T>G	SMAD3	chr15	67192179	67192180	3'UTR	T	G	18.6529	22.2711	0.191156	no	73.6272	58.0246	0.267238	no	0.483871	0.490323	0.0518519	0.0518519
chr15_67192573_67192574_+_G_T	NM_005902.3(SMAD3):c.*2038G>T	SMAD3	chr15	67192573	67192574	3'UTR	G	T					87.0603	63.0732	0.191565	no	0.535484	0.529032	0.037037	0.037037
chr15_67193709_67193710_+_T_-	NM_005902.3(SMAD3):c.*3171delT	SMAD3	chr15	67193709	67193710	3'UTR	T	-					66.6199	97.5109	0.150335	no	0.393548	0.396104	0.0888889	0.0895522
chr15_71817784_71817785_+_T_C	NM_014249.3(NR2E3):c.*101T>C	NR2E3	chr15	71817784	71817785	3'UTR	T	C					72.284	91.8038	0.466331	no	0.458065	0.464516	0.0814815	0.0740741
chr15_71817827_71817828_+_A_T	NM_014249.3(NR2E3):c.*144A>T	NR2E3	chr15	71817827	71817828	3'UTR	A	T	27.9259	25.8414	0.840521	no	73.8137	81.1208	0.728084	no	0.425806	0.425806	0.111111	0.111111
chr15_72346220_72346221_+_C_G	NM_000520.5(HEXA):c.1421+14G>C	HEXA	chr15	72346220	72346221	3'UTR	C	G					60.0547	77.3369	0.354063	no	0.574194	0.574194	0.037037	0.037037
chr15_72738229_72738230_+_A_C	NM_033028.4(BBS4):c.*643A>C	BBS4	chr15	72738229	72738230	3'UTR	A	C					80.7655	143.743	0.151133	no	0.503226	0.509677	0.0518519	0.0444444
[truncated: 3,073 more rows]
