# Supplementary material for: Multiplexed Assays of Human Disease-relevant Mutations Reveal UTR Dinucleotide Composition as a Major Determinant of RNA Stability
Source: bioRxiv preprint, doi:10.1101/2024.04.10.588845, version 2 (2024-10-17)
Supplement: Supplemental Table S5 [file 588845_file07.xlsx]

## Sheet: SH.U5
Gene

## Sheet: SH.U3
Gene

## Sheet: HEK.U5
Gene

## Sheet: HEK.U3
Gene
