# Supplementary material for: Multiplexed Assays of Human Disease-relevant Mutations Reveal UTR Dinucleotide Composition as a Major Determinant of RNA Stability
Source: bioRxiv preprint, doi:10.1101/2024.04.10.588845, version 2 (2024-10-17)
Supplement: Supplemental Table S7 [file 588845_file09.xlsx]

## Sheet: sT7_GDC_BLCA_RNAseq
Proj	type	chr	start	end	WT	mt	GeneSymbol	pVal(donor_W.vsWO)
BLCA	RNAseq	chr10	94402613	94402613	G	A	TBC1D12	0.609457728292336
BLCA	RNAseq	chr10	94402611	94402611	C	T	TBC1D12	0.815894678564187
BLCA	RNAseq	chr14	23567374	23567374	C	T	AP1G2	0.331811426877985
BLCA	RNAseq	chr3	153162653	153162653	G	A	RAP2B	0.846482590986283

## Sheet: sT7_GDC_CESC_RNAseq
Proj	type	chr	start	end	WT	mt	GeneSymbol	pVal(donor_W.vsWO)
CESC	RNAseq	chr2	80648490	80648490	T	-	CTNNA2	3.85926846036e-11
CESC	RNAseq	chr1	185100707	185100707	T	-	RNF2	0.617744396479518
CESC	RNAseq	chr10	62807817	62807817	T	-	ADO	0.403411672513732
CESC	RNAseq	chr18	57486697	57486697	T	-	ONECUT2	0.634851479034121
CESC	RNAseq	chr5	151504751	151504751	G	A	FAT2	0.776394909000793
CESC	RNAseq	chr8	37843743	37843743	A	-	ADGRA2	0.765482629298806

## Sheet: sT7_GDC_COAD_RNAseq
Proj	type	chr	start	end	WT	mt	GeneSymbol	pVal(donor_W.vsWO)
COAD	RNAseq	chr3	46375666	46375666	G	-	CCR5	2.04147965199297e-09
COAD	RNAseq	chr1	26864366	26864366	C	T	SFN	0.154875886452097
COAD	RNAseq	chr17	9898001	9898001	C	T	RCVRN	0.78575789678434
COAD	RNAseq	chr2	20251481	20251481	A	-	PUM2	0.738648891341238
COAD	RNAseq	chrX	49881931	49881931	G	-	USP27X	0.0796361814589048
COAD	RNAseq	chr1	100540788	100540788	T	-	GPR88	0.865818485203627
COAD	RNAseq	chr13	25098168	25098168	A	-	PABPC3	0.315987256468245
COAD	RNAseq	chr18	70326559	70326559	C	-	SOCS6	5.49877188227299e-09
COAD	RNAseq	chr5	134856972	134856972	T	-	C5orf24	0.00271121910652949
COAD	RNAseq	chr1	244056272	244056272	A	-	ZBTB18	0.657876553310504
COAD	RNAseq	chr13	50014171	50014171	A	-	TRIM13	0.571355928450801
COAD	RNAseq	chr14	39399452	39399452	A	-	FBXO33	0.000455661788554274
COAD	RNAseq	chr17	70178658	70178658	G	-	KCNJ2	3.08273315896557e-06
COAD	RNAseq	chr2	27444218	27444218	T	-	KRTCAP3	0.480837651081583
COAD	RNAseq	chr1	235168467	235168467	A	-	ARID4B	0.55019469169613
COAD	RNAseq	chr15	52757502	52757502	A	T	ONECUT1	0.464137154381891
COAD	RNAseq	chr19	51367101	51367101	A	-	CLDND2	0.467113946133985
COAD	RNAseq	chr2	68464197	68464197	T	-	FBXO48	0.953937783506721
COAD	RNAseq	chr2	124915217	124915217	C	T	CNTNAP5	0.479667528287405
COAD	RNAseq	chr2	124915231	124915231	C	T	CNTNAP5	0.454144500497627
COAD	RNAseq	chr4	13484184	13484184	G	-	RAB28	0.812362438883858
COAD	RNAseq	chr5	80321750	80321750	T	-	SPZ1	0.501395099138927
COAD	RNAseq	chr6	96206768	96206768	T	-	FUT9	0.720916283646336
COAD	RNAseq	chr7	20786861	20786861	T	-	SP8	0.591364842552133
COAD	RNAseq	chr9	88994233	88994233	C	-	C9orf47	0.735628236325576
COAD	RNAseq	chr1	109479553	109479553	C	-	SYPL2	0.0741011916378451
COAD	RNAseq	chr11	36578381	36578381	T	-	RAG1	0.183682987737487
COAD	RNAseq	chr12	34027041	34027041	T	-	ALG10	0.00372341968635359
COAD	RNAseq	chr15	89201084	89201084	A	-	ABHD2	0.524089957333403
COAD	RNAseq	chr16	11678760	11678760	T	-	SNN	0.164571767973733
COAD	RNAseq	chr17	43400345	43400345	C	-	ARL4D	0.0821783878851501
COAD	RNAseq	chr19	57134896	57134896	T	-	ZIM3	0.816957038786022
COAD	RNAseq	chr3	20152526	20152526	T	-	KAT2B	0.69692616218631
COAD	RNAseq	chr3	179334472	179334472	T	-	ZNF639	0.193741091722281
COAD	RNAseq	chr6	18222076	18222076	A	-	KDM1B	0.000935785957160151
COAD	RNAseq	chr6	31797625	31797625	A	-	LSM2	0.0323923303181353
COAD	RNAseq	chr6	96206458	96206458	T	-	FUT9	0.79053585037742
COAD	RNAseq	chr6	98836345	98836345	A	-	POU3F2	0.636180616854682
COAD	RNAseq	chr8	2004005	2004005	A	-	KBTBD11	0.381706681276349
COAD	RNAseq	chr8	13026458	13026458	G	-	KIAA1456	0.309177133208577
COAD	RNAseq	chr8	100573746	100573746	A	-	SNX31	0.491549928252186
COAD	RNAseq	chr9	99915230	99915230	T	-	STX17	0.670574765808545
COAD	RNAseq	chr1	9582553	9582553	T	-	SLC25A33	0.606625541329956
COAD	RNAseq	chr1	16922012	16922012	C	-	CROCC	0.863364358877062
COAD	RNAseq	chr1	26574432	26574432	T	-	RPS6KA1	0.409783194038243
COAD	RNAseq	chr1	90916736	90916736	A	-	ZNF644	0.000604854606825578
COAD	RNAseq	chr1	158849431	158849431	T	-	MNDA	0.660012582012333
COAD	RNAseq	chr1	159054953	159054953	A	-	IFI16	5.24351083086572e-06
COAD	RNAseq	chr1	159714547	159714547	C	T	CRP	0.981249550592698
COAD	RNAseq	chr1	244056658	244056658	C	-	ZBTB18	0.642352821477314
COAD	RNAseq	chr10	72893711	72893711	A	-	OIT3	0.282282426991521
COAD	RNAseq	chr10	76884893	76884893	T	-	KCNMA1	0.635545012155269
COAD	RNAseq	chr10	76887161	76887161	A	G	KCNMA1	0.668334036868722
COAD	RNAseq	chr10	111080753	111080753	T	-	ADRA2A	0.808841804092309
COAD	RNAseq	chr10	112427453	112427453	T	-	ACSL5	0.0059046338764976
COAD	RNAseq	chr11	36576816	36576816	T	-	RAG1	0.358289092492655
COAD	RNAseq	chr11	63311104	63311104	A	-	SLC22A10	0.766263616192023
COAD	RNAseq	chr11	124881313	124881313	C	-	ROBO3	0.234132159144741
COAD	RNAseq	chr12	55028503	55028503	T	-	NEUROD4	0.927847950373898
COAD	RNAseq	chr12	67312941	67312941	T	-	CAND1	2.32209806938499e-11
COAD	RNAseq	chr12	118255628	118255628	T	-	TAOK3	0.639077192144097
COAD	RNAseq	chr15	66703228	66703228	C	-	SMAD6	0.113126355396101
COAD	RNAseq	chr15	74135478	74135478	T	-	ISLR2	0.0555326990974637
COAD	RNAseq	chr16	57737164	57737164	G	-	KATNB1	0.234998695644322
COAD	RNAseq	chr17	1649830	1649830	C	-	RILP	0.193945165451995
COAD	RNAseq	chr17	2324062	2324062	A	-	TSR1	0.54327113362636
COAD	RNAseq	chr19	19110944	19110944	G	-	SLC25A42	0.0771151993460461
COAD	RNAseq	chr19	54636934	54636934	C	-	LILRB1	0.00437796098866516
COAD	RNAseq	chr19	55157638	55157638	G	A	TNNI3	0.911332025554134
COAD	RNAseq	chr2	5700924	5700924	G	-	SOX11	0.55838486929663
COAD	RNAseq	chr2	20251532	20251532	A	-	PUM2	0.326095263742236
COAD	RNAseq	chr2	31138133	31138133	C	-	GALNT14	0.923458320221436
COAD	RNAseq	chr2	136114845	136114845	A	-	CXCR4	0.00757347226132876
COAD	RNAseq	chr2	177616647	177616647	A	-	TTC30A	0.037235377820227
COAD	RNAseq	chr2	188734534	188734534	A	-	DIRC1	0.896222287324191
COAD	RNAseq	chr20	298859	298859	T	-	ZCCHC3	0.687010633357755
COAD	RNAseq	chr20	31644998	31644998	A	-	COX4I2	0.238305090489211
COAD	RNAseq	chr21	29054251	29054251	A	-	USP16	0.752890682357079
COAD	RNAseq	chr22	49889463	49889463	T	-	ZBED4	0.441212722764044
COAD	RNAseq	chr3	43366832	43366832	C	-	ANO10	0.00388414222317696
COAD	RNAseq	chr3	132676582	132676582	A	-	UBA5	0.064791852868832
COAD	RNAseq	chr4	44678557	44678557	A	-	GUF1	0.36032946132777
COAD	RNAseq	chr5	77433031	77433031	A	-	WDR41	0.106254726899132
COAD	RNAseq	chr5	135334913	135334913	T	-	H2AFY	0.50789674542215
COAD	RNAseq	chr5	141152906	141152907	CA	-	PCDHB6	0.723934863954866
COAD	RNAseq	chr5	141216890	141216890	T	-	PCDHB13	0.949674328426287
COAD	RNAseq	chr6	21596610	21596610	T	-	SOX4	0.85777277682095
COAD	RNAseq	chr6	165332943	165332943	C	-	PDE10A	0.824331280127658
COAD	RNAseq	chr7	64691907	64691907	A	-	ZNF107	0.374853223442586
COAD	RNAseq	chr7	93358501	93358501	T	-	CCDC132	0.951536105505426
COAD	RNAseq	chr7	96688838	96688838	T	-	SHFM1	0.708309964089941
COAD	RNAseq	chr7	116524963	116524963	T	-	CAV1	0.491846290145286
COAD	RNAseq	chr8	13568072	13568072	T	-	C8orf48	0.816526247549591
COAD	RNAseq	chr8	70574792	70574792	A	-	TRAM1	0.816516032726921
COAD	RNAseq	chr9	15171912	15171912	T	-	TTC39B	0.353156041873086
COAD	RNAseq	chrX	48962468	48962469	-	G	KCND1	0.800511206159867
COAD	RNAseq	chrX	49882359	49882359	A	G	USP27X	0.0282633834357402
COAD	RNAseq	chrX	49882365	49882365	A	G	USP27X	0.371185994674908
COAD	RNAseq	chr1	25498542	25498542	A	-	TMEM57	0.733654558286906
COAD	RNAseq	chr1	31652558	31652559	AC	-	COL16A1	0.190747360219022
COAD	RNAseq	chr1	87344819	87344819	C	T	LMO4	0.374746787417906
COAD	RNAseq	chr1	101240198	101240198	A	-	S1PR1	0.555455599128141
COAD	RNAseq	chr1	114673108	114673108	T	-	AMPD1	0.408450630933702
COAD	RNAseq	chr1	117625613	117625613	T	-	FAM46C	0.438225966880945
COAD	RNAseq	chr1	153944377	153944377	C	-	DENND4B	0.946538455904438
COAD	RNAseq	chr1	160372048	160372048	C	-	NHLH1	0.742116616746455
COAD	RNAseq	chr10	23442067	23442067	T	-	OTUD1	0.526818180939275
COAD	RNAseq	chr10	69507664	69507664	T	G	TSPAN15	0.417343491426303
COAD	RNAseq	chr10	79386312	79386312	G	-	ZCCHC24	0.314257267773328
COAD	RNAseq	chr10	114045803	114045803	T	C	ADRB1	0.727730309697558
COAD	RNAseq	chr10	114046474	114046474	A	-	ADRB1	0.522964150222005
COAD	RNAseq	chr10	114046741	114046741	T	-	ADRB1	0.779205478586162
COAD	RNAseq	chr11	66068764	66068764	T	-	SF3B2	0.666132598866963
COAD	RNAseq	chr11	118176520	118176520	A	-	SCN2B	0.587483614374547
COAD	RNAseq	chr12	1946096	1946096	T	-	DCP1B	0.984647605648234
COAD	RNAseq	chr12	4613836	4613836	T	-	DYRK4	0.201037122658803
COAD	RNAseq	chr12	8513675	8513675	A	-	CLEC4D	0.0449105402789673
COAD	RNAseq	chr12	18683201	18683201	C	T	PLCZ1	0.829617890960603
COAD	RNAseq	chr12	56712516	56712516	A	-	NACA	0.226425058624215
COAD	RNAseq	chr12	57128897	57128897	G	-	LRP1	0.874542917083177
COAD	RNAseq	chr12	124014399	124014399	T	-	ZNF664	0.679438184598478
COAD	RNAseq	chr12	124014582	124014583	-	G	ZNF664	0.556391641760716
COAD	RNAseq	chr13	27945509	27945509	A	G	ATP5EP2	0.832533102882796
COAD	RNAseq	chr13	36827811	36827811	T	-	RFXAP	0.7904960382649
COAD	RNAseq	chr13	37563179	37563179	A	-	POSTN	0.77283314419808
COAD	RNAseq	chr13	49631423	49631423	A	G	ARL11	0.304223762568223
COAD	RNAseq	chr13	83881637	83881637	G	-	SLITRK1	0.864552213876568
COAD	RNAseq	chr13	83881669	83881669	C	-	SLITRK1	0.924439321991114
COAD	RNAseq	chr13	108232110	108232110	A	-	ABHD13	0.60443814657558
COAD	RNAseq	chr14	35081263	35081263	T	G	FAM177A1	0.621133919952058
COAD	RNAseq	chr14	46651765	46651765	G	A	RPL10L	0.406156819811028
COAD	RNAseq	chr14	49896085	49896085	A	-	ARF6	0.804503404236137
COAD	RNAseq	chr14	88468080	88468080	T	-	PTPN21	0.0675035739717166
COAD	RNAseq	chr14	90404785	90404786	-	A	CALM1	0.769958117943075
COAD	RNAseq	chr14	101563276	101563276	G	-	DIO3	0.692597541862999
COAD	RNAseq	chr15	24681944	24681944	T	C	NPAP1	0.727592844302049
COAD	RNAseq	chr15	40771256	40771256	G	-	C15orf62	0.546612654324895
COAD	RNAseq	chr15	74136738	74136738	C	-	ISLR2	0.405038588570774
COAD	RNAseq	chr16	15408143	15408143	T	-	MPV17L	0.43153360542962
COAD	RNAseq	chr16	55846332	55846332	G	A	CES5A	0.709203222059659
COAD	RNAseq	chr16	71853250	71853250	C	-	ATXN1L	0.106140390267787
COAD	RNAseq	chr17	13601200	13601200	C	-	HS3ST3A1	0.000569993264878388
COAD	RNAseq	chr17	30784104	30784104	T	-	CRLF3	0.00167338008733808
COAD	RNAseq	chr17	46024226	46024226	A	-	MAPT	0.473692655860109
COAD	RNAseq	chr17	78675940	78675940	A	-	CYTH1	0.320320257307181
COAD	RNAseq	chr17	79090833	79090834	-	T	RBFOX3	0.866962614912194
COAD	RNAseq	chr17	82442422	82442422	G	-	HEXDC	0.462936958779844
COAD	RNAseq	chr18	23531717	23531717	T	-	NPC1	0.568144039164069
COAD	RNAseq	chr18	23601126	23601126	T	-	ANKRD29	0.515043622802213
COAD	RNAseq	chr18	31067962	31067962	T	-	DSC2	0.728625121138224
COAD	RNAseq	chr19	4653007	4653007	A	-	TNFAIP8L1	0.532435730390744
COAD	RNAseq	chr19	16101534	16101534	T	-	TPM4	0.613021355288255
COAD	RNAseq	chr19	40765176	40765176	C	-	SNRPA	0.363942999851376
COAD	RNAseq	chr19	47521130	47521130	G	-	ZNF541	0.468178398091855
COAD	RNAseq	chr19	48287012	48287012	A	-	ZNF114	0.0802088849416087
COAD	RNAseq	chr19	57546844	57546844	A	-	ZNF550	0.640496724250521
COAD	RNAseq	chr2	5697845	5697845	G	A	SOX11	0.713857872197957
COAD	RNAseq	chr2	19896817	19896817	A	-	TTC32	0.156295509335222
COAD	RNAseq	chr2	24169496	24169496	A	-	FAM228B	0.692591567326724
COAD	RNAseq	chr2	29064853	29064853	C	-	C2orf71	0.877572927941038
COAD	RNAseq	chr2	38017246	38017246	G	A	RMDN2	0.603054715917462
COAD	RNAseq	chr2	43224218	43224218	C	-	ZFP36L2	0.638443571888164
COAD	RNAseq	chr2	65129940	65129940	A	G	RAB1A	0.705425041950237
COAD	RNAseq	chr2	98625493	98625493	A	-	MGAT4A	0.332887899732709
COAD	RNAseq	chr2	106093959	106093959	A	-	UXS1	0.272917683024989
COAD	RNAseq	chr2	107890786	107890786	C	T	RGPD4	0.66030252317841
COAD	RNAseq	chr2	118108473	118108473	C	T	INSIG2	0.243684420175549
COAD	RNAseq	chr2	130181854	130181854	C	-	SMPD4	0.831130937235066
COAD	RNAseq	chr2	161179654	161179654	C	T	TANK	0.728995709276692
COAD	RNAseq	chr2	206115991	206115991	T	-	NDUFS1	0.25813517354074
COAD	RNAseq	chr2	218137112	218137112	A	-	CXCR2	0.297962412809358
COAD	RNAseq	chr2	227981594	227981594	T	-	SPHKAP	0.870784732646807
COAD	RNAseq	chr20	31606477	31606477	T	-	ID1	0.186400298838037
COAD	RNAseq	chr21	21538007	21538007	C	T	NCAM2	0.143328782016726
COAD	RNAseq	chr21	34104024	34104025	-	C	SLC5A3	0.93663102864649
COAD	RNAseq	chr21	40012966	40012966	A	-	DSCAM	0.44265613546096
COAD	RNAseq	chr22	39491058	39491058	C	-	MGAT3	0.462594475547792
COAD	RNAseq	chr22	41436242	41436242	T	-	TOB2	0.658749736436432
COAD	RNAseq	chr3	74264350	74264350	T	-	CNTN3	0.363542167120274
COAD	RNAseq	chr3	126343667	126343667	A	-	KLF15	0.756400935903778
COAD	RNAseq	chr3	128463874	128463874	T	-	DNAJB8	0.879435082075068
COAD	RNAseq	chr3	148742885	148742885	A	-	AGTR1	0.568451957383612
COAD	RNAseq	chr3	160677306	160677306	A	G	ARL14	0.854796175205163
COAD	RNAseq	chr4	42086237	42086237	T	-	SLC30A9	0.518136621979521
COAD	RNAseq	chr4	145137362	145137362	T	-	OTUD4	0.674314484523821
COAD	RNAseq	chr4	165497672	165497672	T	-	CPE	0.255326902944827
COAD	RNAseq	chr4	184629245	184629245	A	-	CASP3	0.357629639411897
COAD	RNAseq	chr5	24487550	24487550	A	-	CDH10	0.463663514596625
COAD	RNAseq	chr5	32791578	32791578	G	A	NPR3	0.817075699276362
COAD	RNAseq	chr5	82276060	82276060	T	-	RPS23	0.791931522013163
COAD	RNAseq	chr5	86617977	86617977	A	-	COX7C	0.195022017499428
COAD	RNAseq	chr5	103276800	103276800	A	-	C5orf30	0.589351451321595
COAD	RNAseq	chr5	130185815	130185815	T	-	CHSY3	0.023251971718578
COAD	RNAseq	chr5	134960777	134960777	T	-	PCBD2	0.299175342660957
COAD	RNAseq	chr5	139307374	139307374	T	A	MATR3	0.522338095733689
COAD	RNAseq	chr5	141152906	141152907	-	A	PCDHB6	0.728782588234331
COAD	RNAseq	chr5	173889668	173889668	A	-	CPEB4	0.0506987041865694
COAD	RNAseq	chr6	13287197	13287197	T	A	PHACTR1	0.68133350903899
COAD	RNAseq	chr6	21596484	21596484	C	-	SOX4	0.795248101030622
COAD	RNAseq	chr6	21598062	21598062	T	-	SOX4	0.239629368038114
COAD	RNAseq	chr6	44253710	44253710	T	-	HSP90AB1	0.422948871097604
COAD	RNAseq	chr6	46223067	46223067	T	-	RCAN2	0.37643877580917
COAD	RNAseq	chr6	96209882	96209882	C	-	FUT9	0.79057928309437
COAD	RNAseq	chr6	98837442	98837442	A	-	POU3F2	0.731020896229553
COAD	RNAseq	chr6	127970081	127970081	A	-	PTPRK	0.0205536216374141
COAD	RNAseq	chr6	155276438	155276438	A	-	CLDN20	0.28800181969614
COAD	RNAseq	chr7	76285867	76285867	C	-	SRRM3	0.715812036677986
COAD	RNAseq	chr7	92200682	92200682	A	-	KRIT1	0.183081079450565
COAD	RNAseq	chr7	117363451	117363451	A	-	ASZ1	0.883806540197007
COAD	RNAseq	chr7	120950764	120950764	T	C	ING3	0.724750594051816
COAD	RNAseq	chr7	134442667	134442667	A	-	AKR1B1	0.340118789019187
COAD	RNAseq	chr8	13028751	13028751	T	-	KIAA1456	0.428864027191556
COAD	RNAseq	chr8	26291737	26291737	C	-	PPP2R2A	0.481725461703592
COAD	RNAseq	chr8	103819491	103819491	A	G	RIMS2	0.860803770417456
COAD	RNAseq	chr8	143652451	143652451	T	-	ZNF623	0.896296415029006
COAD	RNAseq	chr9	14088142	14088142	T	-	NFIB	0.640944998630116
COAD	RNAseq	chr9	68781493	68781493	A	-	FAM122A	0.218110507080906
COAD	RNAseq	chr9	71685161	71685161	T	-	TMEM2	0.196919397075298
COAD	RNAseq	chr9	84003926	84003926	A	T	RMI1	0.487501994925369
COAD	RNAseq	chr9	126835433	126835433	T	-	ZBTB43	0.831948863460401
COAD	RNAseq	chrX	49882360	49882360	A	G	USP27X	0.897114774688997
COAD	RNAseq	chrX	53078020	53078020	C	G	GPR173	0.616226992764248
COAD	RNAseq	chrX	57594804	57594804	T	-	ZXDB	0.45641977256657
COAD	RNAseq	chrX	93711184	93711185	-	T	FAM133A	0.83587750346812
COAD	RNAseq	chrX	153183523	153183523	T	-	MAGEA1	0.830438439545716
COAD	RNAseq	chrX	155780502	155780502	T	-	SPRY3	0.301175801595231

## Sheet: sT7_GDC_COAD_RPPA
Proj	type	chr	start	end	WT	mt	GeneSymbol	pVal(donor_W.vsWO)
COAD	RPPA	chr1	26574432	26574432	T	-	RPS6KA1	1.00116e-06
COAD	RPPA	chr1	26574432	26574432	T	-	RPS6KA1	0.811315
COAD	RPPA	chr7	116524963	116524963	T	-	CAV1	0.366138
COAD	RPPA	chr4	184629245	184629245	A	-	CASP3	0.967503

## Sheet: sT7_GDC_ESCA_RNAseq
Proj	type	chr	start	end	WT	mt	GeneSymbol	pVal(donor_W.vsWO)
ESCA	RNAseq	chr2	80648490	80648490	T	-	CTNNA2	0.803431525276908
ESCA	RNAseq	chr18	57486697	57486697	T	-	ONECUT2	0.737441517681449
ESCA	RNAseq	chr13	66303113	66303113	T	-	PCDH9	0.734759402060075
ESCA	RNAseq	chr19	2038032	2038032	C	-	MKNK2	0.0640585625959746
ESCA	RNAseq	chr19	55519061	55519061	C	-	SSC5D	0.313118467444838
ESCA	RNAseq	chr2	120294679	120294679	T	-	RALB	0.59307838928805
ESCA	RNAseq	chr3	46375666	46375666	G	-	CCR5	0.917602653016479

## Sheet: sT7_GDC_LIHC_RNAseq
Proj	type	chr	start	end	WT	mt	GeneSymbol	pVal(donor_W.vsWO)
LIHC	RNAseq	chr5	1295046	1295046	T	G	TERT	0.729933156485587

## Sheet: sT7_GDC_LUSC_RNAseq
Proj	type	chr	start	end	WT	mt	GeneSymbol	pVal(donor_W.vsWO)
LUSC	RNAseq	chr12	49018833	49018833	C	T	PRKAG1	0.909397963493832
LUSC	RNAseq	chr10	94402613	94402613	G	A	TBC1D12	0.845467820171494

## Sheet: sT7_GDC_SARC_RNAseq
Proj	type	chr	start	end	WT	mt	GeneSymbol	pVal(donor_W.vsWO)
SARC	RNAseq	chr16	23062383	23062383	A	T	USP31	0.87075846685522
SARC	RNAseq	chr9	39072840	39072840	G	C	CNTNAP3	0.506118178444745

## Sheet: sT7_GDC_SKCM_RNAseq
Proj	type	chr	start	end	WT	mt	GeneSymbol	pVal(donor_W.vsWO)
SKCM	RNAseq	chr7	56106490	56106490	G	A	CHCHD2	0.536737458453331
SKCM	RNAseq	chr8	124539103	124539103	C	T	NDUFB9	0.814059667491875
SKCM	RNAseq	chr17	59210028	59210028	G	A	SMG8	0.692032055941657
SKCM	RNAseq	chr8	124539104	124539104	C	T	NDUFB9	0.446001801865038
SKCM	RNAseq	chr3	124730387	124730387	G	A	UMPS	0.177065425926034
SKCM	RNAseq	chr9	127937878	127937878	C	T	DPM2	0.590402434897171
SKCM	RNAseq	chr17	6651614	6651614	C	T	MED31	0.895454163945418
SKCM	RNAseq	chr2	74472680	74472680	G	A	MRPL53	0.556123205016683
SKCM	RNAseq	chr20	35411982	35411982	C	T	UQCC1	0.0143699607566956
SKCM	RNAseq	chr6	31959111	31959111	C	T	SKIV2L	0.769440724257947
SKCM	RNAseq	chr19	3762667	3762667	G	A	MRPL54	0.427691055799134
SKCM	RNAseq	chr22	41468688	41468688	G	A	PHF5A	0.819994575974406
SKCM	RNAseq	chr9	137205690	137205690	G	A	NDOR1	0.808837932102181
SKCM	RNAseq	chr14	23469698	23469698	G	A	NGDN	0.681412562449361
SKCM	RNAseq	chr19	45691983	45691983	C	T	SNRPD2	0.237129037629873
SKCM	RNAseq	chr22	37849419	37849419	C	T	EIF3L	0.0533975526931133
SKCM	RNAseq	chr5	65624999	65624999	C	T	TRAPPC13	0.955705413051893
SKCM	RNAseq	chr1	32222399	32222399	C	T	EIF3I	0.689656261957082
SKCM	RNAseq	chr1	197039236	197039236	G	A	F13B	0.417102759130525
SKCM	RNAseq	chr15	34343159	34343159	C	T	NOP10	0.100058952154486
SKCM	RNAseq	chr15	64163030	64163030	G	A	PPIB	0.00548395086941911
SKCM	RNAseq	chr16	70523553	70523553	C	T	COG4	0.0943026388255968
SKCM	RNAseq	chr17	59210029	59210029	G	A	SMG8	0.872313740125163
SKCM	RNAseq	chr19	9960327	9960327	G	A	COL5A3	0.593698560309498
SKCM	RNAseq	chr20	35542046	35542046	G	A	ERGIC3	0.0467171200816536
SKCM	RNAseq	chr7	126439046	126439046	G	A	GRM8	0.844104758686951
SKCM	RNAseq	chr7	141836304	141836304	C	T	PRSS37	0.0707168708588093
SKCM	RNAseq	chr1	13053671	13053671	G	A	WI2-3308P17.2	0.876375476585332
SKCM	RNAseq	chr11	61792599	61792599	G	A	TMEM258	0.421563078066175
SKCM	RNAseq	chr11	64270132	64270132	G	A	BAD	0.231987586127767
SKCM	RNAseq	chr12	6663125	6663125	C	T	ING4	0.786130545161031
SKCM	RNAseq	chr12	49018865	49018865	G	A	PRKAG1	0.575187145435129
SKCM	RNAseq	chr14	23469699	23469699	G	A	NGDN	0.787063472286905
SKCM	RNAseq	chr14	75985762	75985762	G	A	IFT43	0.523139394295148
SKCM	RNAseq	chr19	49496381	49496381	C	T	RPS11	0.0174654035305035
SKCM	RNAseq	chr2	37231652	37231652	G	A	CEBPZ	0.290491704301275
SKCM	RNAseq	chr22	38681951	38681951	C	T	TOMM22	0.376467526846222
SKCM	RNAseq	chr3	26709584	26709584	G	A	LRRC3B	0.709045823072405
SKCM	RNAseq	chr3	50292517	50292517	G	A	IFRD2	0.00522257329194264
SKCM	RNAseq	chr4	15935810	15935810	C	T	FGFBP1	0.768463949524847
SKCM	RNAseq	chr5	69369558	69369558	G	A	TAF9	0.220262311342714
SKCM	RNAseq	chr5	140869096	140869096	C	T	PCDHA11	0.645528807383004
SKCM	RNAseq	chr5	144474132	144474132	G	A	KCTD16	0.719013647152016
SKCM	RNAseq	chr6	31959095	31959095	G	A	SKIV2L	0.549061446450217
SKCM	RNAseq	chr7	144074217	144074217	G	A	OR2A25	0.563190265820139
SKCM	RNAseq	chr8	39935156	39935156	G	A	IDO2	0.69158892252048
SKCM	RNAseq	chr1	13318396	13318396	C	T	PRAMEF15	0.995932423609176
SKCM	RNAseq	chr1	153990764	153990764	T	A	RPS27	0.0503617716607812
SKCM	RNAseq	chr1	197039280	197039280	G	A	F13B	0.713025530037052
SKCM	RNAseq	chr1	209788400	209788400	G	A	IRF6	0.858973185811736
SKCM	RNAseq	chr11	62839602	62839602	C	T	WDR74	0.480124880070494
SKCM	RNAseq	chr12	13562687	13562687	G	A	GRIN2B	0.534682367717998
SKCM	RNAseq	chr12	34022470	34022470	C	T	ALG10	0.487716572091944
SKCM	RNAseq	chr12	68248726	68248726	C	T	IL22	0.68727694694017
SKCM	RNAseq	chr14	19434332	19434332	C	T	POTEG	0.490084593927833
SKCM	RNAseq	chr14	21723844	21723844	G	A	TRAV3	0.960720232654971
SKCM	RNAseq	chr14	38254548	38254548	C	T	CLEC14A	0.80480195554854
SKCM	RNAseq	chr14	70600663	70600663	C	T	MED6	0.90387185962877
SKCM	RNAseq	chr16	13920158	13920158	G	A	ERCC4	0.503129144679712
SKCM	RNAseq	chr16	69339621	69339621	G	A	COG8	0.490187768656184
SKCM	RNAseq	chr17	4901861	4901861	C	T	C17orf107	0.44346712178246
SKCM	RNAseq	chr17	10521217	10521217	G	A	MYH2	0.977648596317584
SKCM	RNAseq	chr17	50373189	50373189	C	T	MRPL27	0.516184818601285
SKCM	RNAseq	chr19	19516205	19516205	C	T	NDUFA13	0.246039179002749
SKCM	RNAseq	chr19	19516218	19516218	G	A	NDUFA13	0.75853394380697
SKCM	RNAseq	chr19	22756298	22756298	C	T	ZNF99	0.994517832053751
SKCM	RNAseq	chr19	22756991	22756991	C	T	ZNF99	0.0322884750844494
SKCM	RNAseq	chr19	22757256	22757256	G	A	ZNF99	0.889715112710488
SKCM	RNAseq	chr19	45691963	45691963	C	T	SNRPD2	0.276215997428064
SKCM	RNAseq	chr19	57978284	57978284	G	A	ZNF606	0.776286526357422
SKCM	RNAseq	chr20	1476104	1476104	G	A	SIRPB2	0.27375346041302
SKCM	RNAseq	chr20	9539397	9539397	C	T	PAK7	0.873954192354315
SKCM	RNAseq	chr22	15690035	15690035	G	A	POTEH	0.697835269965408
SKCM	RNAseq	chr22	15721421	15721421	G	A	POTEH	0.569654999535426
SKCM	RNAseq	chr4	43030558	43030558	G	A	GRXCR1	0.910949044593443
SKCM	RNAseq	chr4	80963631	80963631	C	T	C4orf22	0.679098948083954
SKCM	RNAseq	chr4	103589673	103589673	G	A	TACR3	0.886479952934911
SKCM	RNAseq	chr4	137532152	137532152	C	T	PCDH18	0.801757772812722
SKCM	RNAseq	chr5	26881053	26881053	C	T	CDH9	0.784559178790504
SKCM	RNAseq	chr5	69369559	69369559	G	A	TAF9	0.388300377954516
SKCM	RNAseq	chr5	119629763	119629763	G	A	FAM170A	0.22907224752278
SKCM	RNAseq	chr6	4995059	4995059	G	A	RPP40	0.241192172708571
SKCM	RNAseq	chr6	6145562	6145562	C	T	F13A1	0.413932478298836
SKCM	RNAseq	chr7	56106487	56106487	G	A	CHCHD2	0.234266346891665
SKCM	RNAseq	chr7	97117635	97117635	C	T	SDHAF3	0.345819474938983
SKCM	RNAseq	chr8	49075264	49075264	C	T	C8orf22	0.846492324125297
SKCM	RNAseq	chr8	78733684	78733684	C	T	IL7	0.79001780441851
SKCM	RNAseq	chr9	33265003	33265003	G	A	CHMP5	0.306728902651587
SKCM	RNAseq	chr9	127937881	127937881	C	T	DPM2	0.00481161795369722
SKCM	RNAseq	chr9	137205691	137205691	G	A	NDOR1	0.247025574892622
SKCM	RNAseq	chrX	151176706	151176706	G	A	GPR50	0.0813986285544259
SKCM	RNAseq	chrX	152653351	152653351	C	T	GABRQ	0.835824090248551
SKCM	RNAseq	chr1	15472056	15472056	G	A	CELA2A	0.763711496968724
SKCM	RNAseq	chr1	15784726	15784726	C	T	FBLIM1	0.281489183113116
SKCM	RNAseq	chr1	32222378	32222378	G	A	EIF3I	0.2331015401311
SKCM	RNAseq	chr1	109479573	109479573	G	A	SYPL2	0.944542200180853
SKCM	RNAseq	chr1	119794173	119794173	G	A	REG4	0.923707200423416
SKCM	RNAseq	chr1	152911628	152911628	C	T	IVL	0.792140736215763
SKCM	RNAseq	chr1	153093502	153093502	C	T	SPRR2E	0.941566228817964
SKCM	RNAseq	chr1	157552405	157552405	C	T	FCRL5	0.75092057232305
SKCM	RNAseq	chr1	159588817	159588817	C	T	APCS	0.880126232565506
SKCM	RNAseq	chr1	160343286	160343286	G	A	COPA	0.535549932983103
SKCM	RNAseq	chr1	160343292	160343292	C	T	COPA	0.308396807133674
SKCM	RNAseq	chr1	160827918	160827918	C	T	LY9	0.923256438843895
SKCM	RNAseq	chr1	176556318	176556318	G	A	PAPPA2	0.897492405337749
SKCM	RNAseq	chr1	196959122	196959122	G	A	CFHR2	0.837658265361983
SKCM	RNAseq	chr1	202892465	202892465	G	A	KLHL12	0.341848237370002
SKCM	RNAseq	chr1	216506895	216506895	C	T	ESRRG	0.821238920117613
SKCM	RNAseq	chr1	231241165	231241165	C	T	C1orf131	0.659171227977363
SKCM	RNAseq	chr10	49708639	49708639	G	A	C10orf53	0.64352799410927
SKCM	RNAseq	chr10	59652723	59652723	C	T	SLC16A9	0.811520926107775
SKCM	RNAseq	chr10	93612650	93612650	C	T	PDE6C	0.85290423801766
SKCM	RNAseq	chr10	96345830	96345830	G	A	OPALIN	0.338686468697676
SKCM	RNAseq	chr10	97401330	97401330	C	T	RRP12	0.385568339970546
SKCM	RNAseq	chr10	97401351	97401351	C	T	RRP12	0.631962382623925
SKCM	RNAseq	chr10	102152296	102152296	C	T	NOLC1	0.969512780028833
SKCM	RNAseq	chr11	8682709	8682709	G	A	RPL27A	0.88741657219877
SKCM	RNAseq	chr11	45649582	45649582	G	A	CHST1	0.580980548728249
SKCM	RNAseq	chr11	49146684	49146684	C	T	FOLH1	0.631556311919621
SKCM	RNAseq	chr11	55270663	55270663	G	A	TRIM48	0.792748004508255
SKCM	RNAseq	chr11	63311095	63311095	G	A	SLC22A10	0.929587720396092
SKCM	RNAseq	chr11	63311118	63311118	G	A	SLC22A10	0.771227664966676
SKCM	RNAseq	chr11	63516407	63516407	G	A	LGALS12	0.75239102345181
SKCM	RNAseq	chr11	72434552	72434552	G	A	CLPB	0.358156201451181
SKCM	RNAseq	chr12	8513621	8513621	G	A	CLEC4D	0.588050580802563
SKCM	RNAseq	chr12	38316764	38316764	C	T	ALG10B	0.817634102152951
SKCM	RNAseq	chr12	48483255	48483255	C	T	C12orf54	0.704510837545384
SKCM	RNAseq	chr12	51324119	51324119	G	A	BIN2	0.374453736329601
SKCM	RNAseq	chr12	52768592	52768592	C	T	KRT76	0.693467914674636
SKCM	RNAseq	chr12	57488005	57488005	C	T	MARS	0.299765035784926
SKCM	RNAseq	chr12	57694127	57694127	G	A	OS9	4.41755943469957e-05
SKCM	RNAseq	chr12	68686963	68686963	G	A	NUP107	0.888088250586023
SKCM	RNAseq	chr12	70639091	70639091	C	T	PTPRR	0.0113924928623574
SKCM	RNAseq	chr12	101486788	101486788	C	T	SPIC	0.0841754758934297
SKCM	RNAseq	chr12	101921391	101921391	C	T	DRAM1	0.390497231434092
SKCM	RNAseq	chr14	78645206	78645206	G	A	NRXN3	0.657058107644592
SKCM	RNAseq	chr14	94378416	94378416	G	A	SERPINA1	0.747193734975877
SKCM	RNAseq	chr14	98717324	98717324	C	T	C14orf177	0.662226639800643
SKCM	RNAseq	chr14	102362876	102362876	G	A	CINP	0.186631340272547
SKCM	RNAseq	chr15	70832009	70832009	G	A	LARP6	0.213368464520917
SKCM	RNAseq	chr15	83618317	83618317	C	T	SH3GL3	0.932247029850684
SKCM	RNAseq	chr15	96785185	96785185	G	A	SPATA8	0.841816475860952
SKCM	RNAseq	chr16	20537152	20537152	C	T	ACSM2B	0.443721109297187
SKCM	RNAseq	chr16	23757687	23757687	C	T	CHP2	0.722556376608583
SKCM	RNAseq	chr16	30992809	30992809	G	A	STX1B	0.876649441731618
SKCM	RNAseq	chr16	31490063	31490063	G	A	C16orf58	0.166753237283648
SKCM	RNAseq	chr16	67227119	67227119	C	T	TMEM208	0.829974489305646
SKCM	RNAseq	chr17	41382378	41382378	C	T	KRT34	0.907385992349064
SKCM	RNAseq	chr17	55159919	55159919	C	T	STXBP4	0.426432351780257
SKCM	RNAseq	chr17	81683840	81683840	C	T	ARL16	0.848958689316791
SKCM	RNAseq	chr17	81683876	81683876	C	T	ARL16	0.39462777400129
SKCM	RNAseq	chr17	81918152	81918152	C	T	SIRT7	0.851832789595915
SKCM	RNAseq	chr18	31376845	31376845	C	T	DSG4	0.909042612777691
SKCM	RNAseq	chr18	61815838	61815838	C	T	RNF152	0.798188830300983
SKCM	RNAseq	chr18	61816502	61816502	G	A	RNF152	0.699895064417658
SKCM	RNAseq	chr18	63655630	63655630	C	T	SERPINB3	0.743698019720123
SKCM	RNAseq	chr18	74148650	74148650	C	T	TIMM21	0.916926913884631
SKCM	RNAseq	chr19	7740536	7740536	G	A	CD209	0.923029583487046
SKCM	RNAseq	chr19	11804606	11804606	C	T	ZNF491	0.098570579846865
SKCM	RNAseq	chr19	18444744	18444744	G	A	ELL	0.800709404557619
SKCM	RNAseq	chr19	20005954	20005954	G	A	ZNF682	0.244670957976626
SKCM	RNAseq	chr19	22756598	22756598	G	A	ZNF99	0.542541948000278
SKCM	RNAseq	chr19	22757043	22757043	G	A	ZNF99	0.769204591784333
SKCM	RNAseq	chr19	22757311	22757311	G	A	ZNF99	0.716932256530372
SKCM	RNAseq	chr19	41095983	41095983	G	A	CYP2A13	0.708041614399268
SKCM	RNAseq	chr19	42867019	42867019	C	T	PSG1	0.820188127038782
SKCM	RNAseq	chr19	45691966	45691966	C	T	SNRPD2	0.756668329220655
SKCM	RNAseq	chr19	46850865	46850865	C	T	AP2S1	0.839512349178649
SKCM	RNAseq	chr19	51643238	51643238	G	A	SIGLEC14	0.769067289628559
SKCM	RNAseq	chr19	51745863	51745863	G	A	FPR1	0.329669317136607
SKCM	RNAseq	chr19	55785623	55785623	G	A	NLRP11	0.535304952710888
SKCM	RNAseq	chr19	55987954	55987954	C	T	NLRP8	0.792976771005608
SKCM	RNAseq	chr2	68395832	68395832	C	T	PLEK	0.252288413212562
SKCM	RNAseq	chr2	79157216	79157216	C	T	REG3A	0.898596036213722
SKCM	RNAseq	chr2	134954671	134954671	C	T	CCNT2	0.419256292660508
SKCM	RNAseq	chr2	184939042	184939042	G	A	ZNF804A	0.708128433245729
SKCM	RNAseq	chr2	218164124	218164124	C	T	CXCR1	0.622446439389767
SKCM	RNAseq	chr2	229025591	229025591	C	T	PID1	0.68299257191191
SKCM	RNAseq	chr2	232480113	232480113	C	T	ECEL1	0.00660653193788763
SKCM	RNAseq	chr20	4724551	4724551	G	A	PRND	0.757908463239637
SKCM	RNAseq	chr20	9539451	9539451	G	A	PAK7	0.938035508132941
SKCM	RNAseq	chr20	19721189	19721189	G	A	SLC24A3	0.731453416444253
SKCM	RNAseq	chr20	35411983	35411983	C	T	UQCC1	0.40332984677921
SKCM	RNAseq	chr22	21666010	21666010	G	A	PPIL2	0.0390967783525282
SKCM	RNAseq	chr22	37849375	37849375	G	A	EIF3L	0.35516023943213
SKCM	RNAseq	chr22	44496691	44496691	G	A	LDOC1L	0.953808035915719
SKCM	RNAseq	chr3	2571481	2571481	C	T	CNTN4	0.618039326581389
SKCM	RNAseq	chr3	30728211	30728211	G	A	GADL1	0.690868144007486
SKCM	RNAseq	chr3	50292526	50292526	G	A	IFRD2	0.0926555090607879
SKCM	RNAseq	chr3	68544527	68544527	G	A	FAM19A1	0.83021504220615
SKCM	RNAseq	chr3	68733140	68733140	C	T	FAM19A4	0.895385122791125
SKCM	RNAseq	chr3	108822868	108822868	G	A	TRAT1	0.505520582092249
SKCM	RNAseq	chr3	111845843	111845843	C	T	PLCXD2	0.497215589419719
SKCM	RNAseq	chr3	121988297	121988297	G	A	ILDR1	0.432527007802529
SKCM	RNAseq	chr3	164979332	164979332	C	T	SI	0.857046739519915
SKCM	RNAseq	chr3	169143703	169143703	C	T	MECOM	0.021159811348642
SKCM	RNAseq	chr3	192143957	192143957	G	A	FGF12	0.639104656420564
SKCM	RNAseq	chr3	194672235	194672235	G	A	LSG1	0.397405959949032
SKCM	RNAseq	chr4	40425887	40425887	C	T	RBM47	0.744232174531835
SKCM	RNAseq	chr4	69495887	69495887	C	T	UGT2B4	0.0238346282552433
SKCM	RNAseq	chr4	70389932	70389932	C	T	SMR3B	0.946950666317437
SKCM	RNAseq	chr4	97558948	97558948	G	A	STPG2	0.303578840513309
SKCM	RNAseq	chr4	176683887	176683887	C	T	VEGFC	0.553874024081679
SKCM	RNAseq	chr5	40835217	40835217	G	A	RPL37	0.901935922093316
SKCM	RNAseq	chr5	40835220	40835220	G	A	RPL37	0.871516749396258
SKCM	RNAseq	chr5	40998023	40998023	G	A	MROH2B	0.852743499906928
SKCM	RNAseq	chr5	119629685	119629685	C	T	FAM170A	1.56119339678185e-10
SKCM	RNAseq	chr5	141097199	141097199	G	A	PCDHB2	0.308256048882722
SKCM	RNAseq	chr5	150701105	150701105	C	T	RBM22	0.643387713131164
SKCM	RNAseq	chr5	152392114	152392114	C	T	NMUR2	0.853494506635768
SKCM	RNAseq	chr6	7880415	7880415	G	A	BMP6	0.609633506040923
SKCM	RNAseq	chr6	31959161	31959161	C	T	SKIV2L	0.683064721238038
SKCM	RNAseq	chr6	33314081	33314081	C	T	TAPBP	0.0915100571710154
SKCM	RNAseq	chr6	33314082	33314082	C	T	TAPBP	0.985702072178536
SKCM	RNAseq	chr6	33322966	33322966	G	A	DAXX	0.684729447606098
SKCM	RNAseq	chr6	130441943	130441943	G	A	TMEM200A	5.13589171191597e-13
SKCM	RNAseq	chr7	6009250	6009250	C	T	AIMP2	0.224222570481752
SKCM	RNAseq	chr7	86864477	86864477	G	A	GRM3	0.962853136568699
SKCM	RNAseq	chr7	100586591	100586591	C	T	FBXO24	0.420501015913993
SKCM	RNAseq	chr7	100586598	100586598	C	T	FBXO24	0.777594298651162
SKCM	RNAseq	chr7	101218118	101218118	G	A	ZNHIT1	0.323399096943714
SKCM	RNAseq	chr7	130018595	130018595	G	A	ZC3HC1	0.889941015828683
SKCM	RNAseq	chr7	130668748	130668748	G	A	COPG2	0.152639292958789
SKCM	RNAseq	chr7	141972677	141972677	C	T	TAS2R38	0.811638242062822
SKCM	RNAseq	chr7	142252179	142252179	G	A	PRSS58	0.702128940159028
SKCM	RNAseq	chr8	7015904	7015904	G	A	DEFA3	0.0769451567324362
SKCM	RNAseq	chr8	103415436	103415436	G	A	DCAF13	0.813337284700899
SKCM	RNAseq	chr8	116755817	116755817	G	A	EIF3H	0.475747666087177
SKCM	RNAseq	chr8	117172765	117172765	G	A	SLC30A8	0.141467870100758
SKCM	RNAseq	chr8	123241370	123241370	G	A	C8orf76	0.284062705492422
SKCM	RNAseq	chr9	116721	116721	G	A	FOXD4	0.476153614081751
SKCM	RNAseq	chr9	71911615	71911615	G	A	C9orf85	0.227587365460992
SKCM	RNAseq	chr9	119313376	119313376	C	T	BRINP1	0.821132233930624
SKCM	RNAseq	chr9	127908351	127908351	G	A	ST6GALNAC4	0.452797441337434
SKCM	RNAseq	chrX	26195090	26195090	C	T	MAGEB6	0.598646127162864
SKCM	RNAseq	chrX	43958683	43958683	G	A	NDP	0.805102573126011
SKCM	RNAseq	chrX	106033426	106033426	C	T	SERPINA7	0.835643681629676
SKCM	RNAseq	chrX	116173466	116173466	C	T	AGTR2	0.827795677892533
SKCM	RNAseq	chrX	131088794	131088794	C	T	ARHGAP36	0.891862818477613
SKCM	RNAseq	chrX	141003684	141003684	G	A	SPANXB1	0.932140369831409
SKCM	RNAseq	chrX	151722814	151722814	C	T	FATE1	0.602548501082642

## Sheet: sT7_GDC_SKCM_RPPA
Proj	type	chr	start	end	WT	mt	GeneSymbol	pVal(donor_W.vsWO)
SKCM	RPPA	chr11	64270132	64270132	G	A	BAD	0.479046

[truncated: 5 more sheets: sT7_GDC_STAD_RNAseq, sT7_GDC_STAD_RPPA, sT7_GDC_THCA_RNAseq, sT7_GDC_UCEC_RNAseq, sT7_GDC_UCEC_RPPA]
